# Supplementary material for: Bird Communities and Environmental Correlates in Southern Oregon and Northern California, USA
Source: PLoS One. 2016 Oct 12;11(10):e0163906. doi: 10.1371/journal.pone.0163906 (PMC5061419; doi:10.1371/journal.pone.0163906)
Supplement: S2 Spreadsheet — Environmental variables associated with 1,990 Klamath Ecoregion bird monitoring sites included in the final analyses. See S2 Table for data source, definitions, and scale. (XLSX) [file pone.0163906.s002.xlsx]

## Sheet: Sheet1
	km to Any Stream	km to Coast	km to lakes or streams	km to Major Road	km to Any road	Annual Precipitation	Temp Range (4 to 7)	Breeding Season avg Temp (4 to 7)	Canopy Cover	Tree height	FPAR	Slope	Elevation	Heat Load Index		SimProf	Categorical Aspect	CBD_Code	CBD_Define	SCl_Define	VDist_Code	VDist_Type	VDist_Svry	ESP_Define	BPS_CODE	BPS_NAME	BPS_GrupID	BPS_GrpNme	BPS_GrpVeg	EVC_Code	EVC_Define	MZ	ZONE_NAME	ESP2	ESP_NAME	ESP_Code	EVT_PHYS	EVT_GP_N	SAF_SRM	EVT_ORDER	EVT_CLASS	EVH_Define	EVT_FUEL_N	EVT_LF	EVT_SBCLS	CC_Define	Park	Break Down Group
BORG FORA_4	3459.03	160.105	1716.87	56.4317	54.6659	621.99	27.63	21.0875	0	0	21	0	74	0.7556		ah	Flat	0	Non-Forested	Succession Class B	0	No Disturbance	NA	Upland Shrub	11050	Northern and Central California Dry-Mesic Chaparral	208	Chamise-Manzanita-4	Shrubland	114	Shrub Cover >= 40 and < 50%	5	California Central Valley	1100	California Lower Montane Blue Oak-Foothill Pine Woodland and Savanna	3	Shrubland	Chaparral	SRM 206: Chamise Chaparral	Shrub-dominated	Shrubland	Non-Forested	Sh Northern and Central California Dry-Mesic Chaparral	Shrub	Evergreen shrubland	Non-Forested	No	Shrubland
BORG VIPL_2	4930.95	156.945	1536.1	53.369	51.7886	597.43	27.52	21.0425	15	75	21	0	66	0.757518		ah	SE	5	5 <= CBD < 6	Uncharacteristic Native Vegetation Cover / Struct*	113	Fire	Low	Upland Woodland	11140	California Lower Montane Blue Oak-Foothill Pine Woodland and Savanna	211	Blue Oak-California Foothill Pine-1	Hardwood	101	Tree Cover >= 10 and < 20%	5	California Central Valley	1100	California Lower Montane Blue Oak-Foothill Pine Woodland and Savanna	4	Riparian	Western Riparian Woodland and Shrubland	SRM 203: Riparian Woodland	Tree-dominated	Open tree canopy	50 <= CH < 100	Tr California Montane Riparian Systems	Tree	Mixed evergreen-deciduous open tree canopy	10 <= CC < 20	No	Shrubland
CLCR OLMI_3	1152.39	140.04	60.549	3.0625	2.96432	1033.74	28.87	21.6325	0	0	52	1	166	0.779573		v	S	0	Non-Forested	Non-burnable Urban	0	No Disturbance	NA	Upland Herb	11510	California Central Valley Riparian Woodland and Shrubland	248	Fremont Cottonwood-Boxelder-California Wild Grape*	Riparian	32	Quarries-Strip Mines-Gravel Pits	5	California Central Valley	1200	California Central Valley Riparian Woodland and Shrubland	2	Quarries-Strip Mines-Gravel Pits	Quarries-Strip Mines-Gravel Pits	Non-vegetated	Non-vegetated	Non-vegetated	Non-Forested	Bab Quarries-Strip Mines-Gravel Pits	Barren	Developed	Non-Forested	No	Agriculture
CLCR OLMI_8	1254.93	140.115	0	3.45013	3.34341	1032.47	29	21.6625	0	0	49	2	159	0.757483		y	NW	0	Non-Forested	Non-burnable Urban	0	No Disturbance	NA	Upland Woodland	11050	Northern and Central California Dry-Mesic Chaparral	208	Chamise-Manzanita-4	Shrubland	32	Quarries-Strip Mines-Gravel Pits	5	California Central Valley	1100	California Lower Montane Blue Oak-Foothill Pine Woodland and Savanna	4	Quarries-Strip Mines-Gravel Pits	Quarries-Strip Mines-Gravel Pits	Non-vegetated	Non-vegetated	Non-vegetated	Non-Forested	Bab Quarries-Strip Mines-Gravel Pits	Barren	Developed	Non-Forested	No	Conifer
CLCR PRAR_2	832.292	138.062	808.811	2.22506	1.51983	1019.82	28.94	21.5675	0	0	51	8	189	0.858401		v	SW	0	Non-Forested	Succession Class B	0	No Disturbance	NA	Upland Shrub	11140	California Lower Montane Blue Oak-Foothill Pine Woodland and Savanna	211	Blue Oak-California Foothill Pine-1	Hardwood	113	Shrub Cover >= 30 and < 40%	3	Northern California Coastal Range	1100	California Lower Montane Blue Oak-Foothill Pine Woodland and Savanna	3	Shrubland	Chaparral	SRM 207: Scrub Oak Mixed Chaparral	Shrub-dominated	Shrubland	Non-Forested	Sh California Mesic Chaparral	Shrub	Evergreen shrubland	Non-Forested	No	Agriculture
CLCR PRAR_7	832.292	138.062	808.811	2.22506	1.51983	1019.82	28.94	21.5675	0	0	51	8	189	0.858401		v	SW	0	Non-Forested	Succession Class B	0	No Disturbance	NA	Upland Shrub	11140	California Lower Montane Blue Oak-Foothill Pine Woodland and Savanna	211	Blue Oak-California Foothill Pine-1	Hardwood	113	Shrub Cover >= 30 and < 40%	3	Northern California Coastal Range	1100	California Lower Montane Blue Oak-Foothill Pine Woodland and Savanna	3	Shrubland	Chaparral	SRM 207: Scrub Oak Mixed Chaparral	Shrub-dominated	Shrubland	Non-Forested	Sh California Mesic Chaparral	Shrub	Evergreen shrubland	Non-Forested	No	Agriculture
CLCR REBA_1	2089	136.746	995.205	0.924175	0.939257	1023.58	28.92	21.54	35	25	46	1	180	0.770063		z	SW	9	9 <= CBD < 10	Succession Class B	0	No Disturbance	NA	Upland Forest	11520	California Montane Riparian Systems	249	Black Cottonwood-Arroyo Willow-Madrone-3	Riparian	103	Tree Cover >= 30 and < 40%	3	Northern California Coastal Range	1200	California Montane Riparian Systems	5	Riparian	Western Riparian Woodland and Shrubland	SRM 203: Riparian Woodland	Tree-dominated	Open tree canopy	0 < CH < 50	Tr California Montane Riparian Systems	Tree	Mixed evergreen-deciduous open tree canopy	30 <= CC < 40	No	Mixed
CLCR SACC_7	719.446	147.199	316.812	9.24867	9.23224	917.77	29.34	21.64	0	0	47	0	132	0.757518		z	SE	0	Non-Forested	Burnable Urban	0	No Disturbance	NA	Undetermined	11510	California Central Valley Riparian Woodland and Shrubland	248	Fremont Cottonwood-Boxelder-California Wild Grape*	Riparian	123	Herb Cover >= 30 and < 40%	5	California Central Valley	1200	California Central Valley Riparian Woodland and Shrubland	0	Developed	Developed-Upland Herbaceous	LF 20: Developed	Herbaceous / Nonvascular-dominated	Herbaceous - grassland	Non-Forested	Dgr Developed Ruderal Grassland	Herb	Herbaceous - grassland	Non-Forested	No	Mixed
CLCR WHDA_2	191.011	133.137	225.799	3.55016	0.201027	1576.71	29.28	20.6825	55	175	69	3	323	0.799004		y	S	1	1 <= CBD < 2	Succession Class D	0	No Disturbance	NA	Upland Forest	11140	California Lower Montane Blue Oak-Foothill Pine Woodland and Savanna	211	Blue Oak-California Foothill Pine-1	Hardwood	105	Tree Cover >= 50 and < 60%	3	Northern California Coastal Range	1100	California Lower Montane Blue Oak-Foothill Pine Woodland and Savanna	5	Conifer-Hardwood	Conifer-Oak Forest and Woodland	SAF 250: Blue Oak-Digger Pine	Tree-dominated	Sparse tree canopy	100 <= CH < 250	Tr California Lower Montane Blue Oak-Foothill Pine Forest and Woodland	Tree	Mixed evergreen-deciduous closed tree canopy	50 <= CC < 60	WHIS	Conifer
KBOFUELRASHLAND HOGU_07	254.896	121.517	2704.26	5.80025	0.5381	970.93	24.27	11.9125	45	375	88	22	1303	0.989935		m	W	6	6 <= CBD < 7	Succession Class D	0	No Disturbance	NA	Upland Forest	10280	Mediterranean California Mesic Mixed Conifer Forest and Woodland	117	Douglas Fir-White Fir-Sugar Pine-1	Conifer	104	Tree Cover >= 40 and < 50%	2	Oregon Coastal Range	1000	Mediterranean California Mesic Mixed Conifer Forest and Woodland	5	Conifer	Douglas-fir-Ponderosa Pine-Lodgepole Pine Forest and Woodland	SAF 243: Sierra Nevada Mixed Conifer	Tree-dominated	Open tree canopy	250 <= CH < 500	Tr Mediterranean California Dry-Mesic Mixed Conifer Forest and Woodland	Tree	Evergreen open tree canopy	40 <= CC < 50	No	Conifer
KBOFUELRASHLAND HORN_01	16.873	119.085	3884.22	7.31114	0.553466	817.38	25.33	13.595	75	375	85	23	1077	0.88544		m	NW	16	16 <= CBD < 17	Succession Class E	0	No Disturbance	NA	Upland Forest	10270	Mediterranean California Dry-Mesic Mixed Conifer Forest and Woodland	116	Ponderosa Pine-Incense Cedar-1	Conifer	107	Tree Cover >= 70 and < 80%	2	Oregon Coastal Range	1000	Mediterranean California Dry-Mesic Mixed Conifer Forest and Woodland	5	Conifer	California Mixed Evergreen Forest and Woodland	SAF 234: Douglas-Fir-Tanoak-Pacific Madrone	Tree-dominated	Closed tree canopy	250 <= CH < 500	Tr Mediterranean California Mixed Evergreen Forest	Tree	Evergreen closed tree canopy	70 <= CC < 80	No	Conifer
KBOFUELRASHLAND HORN_10	387.693	119.684	3131.17	7.15945	0.399938	1003.94	24.24	11.6675	45	375	85	17	1421	0.927356		m	W	6	6 <= CBD < 7	Succession Class D	0	No Disturbance	NA	Upland Forest	10280	Mediterranean California Mesic Mixed Conifer Forest and Woodland	117	Douglas Fir-White Fir-Sugar Pine-1	Conifer	104	Tree Cover >= 40 and < 50%	2	Oregon Coastal Range	1000	Mediterranean California Mesic Mixed Conifer Forest and Woodland	5	Conifer	Douglas-fir-Ponderosa Pine-Lodgepole Pine Forest and Woodland	SAF 243: Sierra Nevada Mixed Conifer	Tree-dominated	Open tree canopy	250 <= CH < 500	Tr Mediterranean California Dry-Mesic Mixed Conifer Forest and Woodland	Tree	Evergreen open tree canopy	40 <= CC < 50	No	Conifer
KBOFUELRASHLAND LEFO_04	86.15	125.76	1612.74	4.51248	0.464044	784.06	25.66	13.6025	75	375	90	36	1114	0.629818		ac	SE	16	16 <= CBD < 17	Succession Class E	0	No Disturbance	NA	Upland Forest	10370	North Pacific Maritime Dry-Mesic Douglas-fir-Western Hemlock Forest	127	Douglas Fir-Western Hemlock-3	Conifer	107	Tree Cover >= 70 and < 80%	2	Oregon Coastal Range	1000	North Pacific Maritime Dry-Mesic Douglas-fir-Western Hemlock Forest	5	Conifer	Douglas-fir Forest and Woodland	SAF 229: Pacific Douglas-Fir	Tree-dominated	Closed tree canopy	250 <= CH < 500	Tr North Pacific Dry Douglas-fir(-Madrone) Forest and Woodland	Tree	Evergreen closed tree canopy	70 <= CC < 80	No	Conifer
KBOFUELRASHLAND LEFO_10	27.938	125.583	876.368	4.03854	0.357612	703.48	25.62	13.2575	75	375	82	25	988	1.02799		ac	W	16	16 <= CBD < 17	Succession Class B	0	No Disturbance	NA	Upland Forest	10370	North Pacific Maritime Dry-Mesic Douglas-fir-Western Hemlock Forest	127	Douglas Fir-Western Hemlock-3	Conifer	107	Tree Cover >= 70 and < 80%	7	Cascade Mountain Range	1000	North Pacific Maritime Dry-Mesic Douglas-fir-Western Hemlock Forest	5	Conifer	Douglas-fir-Ponderosa Pine-Lodgepole Pine Forest and Woodland	SAF 243: Sierra Nevada Mixed Conifer	Tree-dominated	Open tree canopy	250 <= CH < 500	Tr Mediterranean California Dry-Mesic Mixed Conifer Forest and Woodland	Tree	Evergreen open tree canopy	70 <= CC < 80	No	Conifer
KBOFUELRASHLAND PAPE_09	307.709	121.834	2760.71	4.26675	0.292499	816.03	24.02	13.1125	75	375	92	18	1122	0.944539		m	SW	16	16 <= CBD < 17	Succession Class C	0	No Disturbance	NA	Upland Forest	10430	Mediterranean California Mixed Evergreen Forest	133	Douglas Fir-Tanoak-Pacific Madrone-1	Conifer	107	Tree Cover >= 70 and < 80%	2	Oregon Coastal Range	1000	North Pacific Maritime Dry-Mesic Douglas-fir-Western Hemlock Forest	5	Conifer	California Mixed Evergreen Forest and Woodland	SAF 234: Douglas-Fir-Tanoak-Pacific Madrone	Tree-dominated	Closed tree canopy	250 <= CH < 500	Tr Mediterranean California Mixed Evergreen Forest	Tree	Evergreen closed tree canopy	70 <= CC < 80	No	Conifer
KBOFUELRASHLAND REED_04	175.919	124.283	798.019	3.3783	0.023563	712.07	26.4	14.0225	45	375	92	25	939	0.413925		m	NE	6	6 <= CBD < 7	Succession Class C	0	No Disturbance	NA	Upland Forest	10300	Mediterranean California Lower Montane Black Oak-Conifer Forest and Woodland	119	Ponderosa Pine-California Black Oak-1	Conifer	104	Tree Cover >= 40 and < 50%	2	Oregon Coastal Range	1000	Mediterranean California Dry-Mesic Mixed Conifer Forest and Woodland	5	Conifer	California Mixed Evergreen Forest and Woodland	SAF 234: Douglas-Fir-Tanoak-Pacific Madrone	Tree-dominated	Closed tree canopy	250 <= CH < 500	Tr Mediterranean California Mixed Evergreen Forest	Tree	Evergreen closed tree canopy	40 <= CC < 50	No	Conifer
KBOFUELRASHLAND REED_12	123.209	123.065	1789.17	3.85801	0.025923	750.53	24.25	13.125	75	375	88	27	1210	0.499084		ac	E	16	16 <= CBD < 17	Succession Class E	0	No Disturbance	NA	Upland Forest	10270	Mediterranean California Dry-Mesic Mixed Conifer Forest and Woodland	116	Ponderosa Pine-Incense Cedar-1	Conifer	107	Tree Cover >= 70 and < 80%	2	Oregon Coastal Range	1000	Mediterranean California Dry-Mesic Mixed Conifer Forest and Woodland	5	Conifer	Douglas-fir-Ponderosa Pine-Lodgepole Pine Forest and Woodland	SAF 243: Sierra Nevada Mixed Conifer	Tree-dominated	Open tree canopy	250 <= CH < 500	Tr Mediterranean California Dry-Mesic Mixed Conifer Forest and Woodland	Tree	Evergreen open tree canopy	70 <= CC < 80	No	Conifer
KBOFUELRASHLAND TOL1_03	269.184	125.948	972.686	2.14767	0.025177	635.1	26.78	14.2125	25	175	87	14	960	0.930083		m	W	4	4 <= CBD < 5	Succession Class C	113	Fire	Low	Upland Forest	10300	Mediterranean California Lower Montane Black Oak-Conifer Forest and Woodland	119	Ponderosa Pine-California Black Oak-1	Conifer	102	Tree Cover >= 20 and < 30%	7	Cascade Mountain Range	1000	Mediterranean California Dry-Mesic Mixed Conifer Forest and Woodland	5	Conifer	Douglas-fir Forest and Woodland	SAF 229: Pacific Douglas-Fir	Tree-dominated	Closed tree canopy	100 <= CH < 250	Tr North Pacific Dry Douglas-fir(-Madrone) Forest and Woodland	Tree	Evergreen closed tree canopy	20 <= CC < 30	No	Conifer
KBOFUELRASHLAND TOL1_10	414.285	125.78	800.017	1.88905	0.014491	620.96	27.89	14.3075	65	375	81	15	932	0.555144		m	NE	12	12 <= CBD < 13	Succession Class E	0	No Disturbance	NA	Upland Forest	10270	Mediterranean California Dry-Mesic Mixed Conifer Forest and Woodland	116	Ponderosa Pine-Incense Cedar-1	Conifer	106	Tree Cover >= 60 and < 70%	7	Cascade Mountain Range	1000	Mediterranean California Dry-Mesic Mixed Conifer Forest and Woodland	5	Conifer	Douglas-fir Forest and Woodland	SAF 229: Pacific Douglas-Fir	Tree-dominated	Closed tree canopy	250 <= CH < 500	Tr North Pacific Dry Douglas-fir(-Madrone) Forest and Woodland	Tree	Evergreen closed tree canopy	60 <= CC < 70	No	Conifer
KBOFUELRASHLAND TOL2_10	51.637	127.488	1685.64	3.21994	0.014589	674.98	26.08	13.735	75	375	91	28	1161	0.619737		m	E	16	16 <= CBD < 17	Succession Class E	0	No Disturbance	NA	Upland Forest	10270	Mediterranean California Dry-Mesic Mixed Conifer Forest and Woodland	116	Ponderosa Pine-Incense Cedar-1	Conifer	107	Tree Cover >= 70 and < 80%	7	Cascade Mountain Range	1000	North Pacific Maritime Dry-Mesic Douglas-fir-Western Hemlock Forest	5	Conifer	California Mixed Evergreen Forest and Woodland	SAF 234: Douglas-Fir-Tanoak-Pacific Madrone	Tree-dominated	Closed tree canopy	250 <= CH < 500	Tr Mediterranean California Mixed Evergreen Forest	Tree	Evergreen closed tree canopy	70 <= CC < 80	No	Conifer
KBOFUELRASHLAND TOL3_11	243.382	128.39	1723.86	2.5314	0.084994	713.11	25.49	13.0075	75	175	94	16	1214	0.638071		ac	E	22	22 <= CBD < 23	Succession Class B	0	No Disturbance	NA	Upland Forest	10270	Mediterranean California Dry-Mesic Mixed Conifer Forest and Woodland	116	Ponderosa Pine-Incense Cedar-1	Conifer	107	Tree Cover >= 70 and < 80%	7	Cascade Mountain Range	1000	Mediterranean California Dry-Mesic Mixed Conifer Forest and Woodland	5	Conifer	California Mixed Evergreen Forest and Woodland	SAF 234: Douglas-Fir-Tanoak-Pacific Madrone	Tree-dominated	Closed tree canopy	100 <= CH < 250	Tr Mediterranean California Mixed Evergreen Forest	Tree	Evergreen closed tree canopy	70 <= CC < 80	No	Conifer
KBOFUELRASHLAND UEFO_02	151.227	125.569	1939.11	5.34842	0.438208	830.07	24.36	12.6625	45	375	78	18	1316	0.623067		ac	N	6	6 <= CBD < 7	Succession Class D	0	No Disturbance	NA	Upland Forest	10280	Mediterranean California Mesic Mixed Conifer Forest and Woodland	117	Douglas Fir-White Fir-Sugar Pine-1	Conifer	104	Tree Cover >= 40 and < 50%	2	Oregon Coastal Range	1000	Mediterranean California Mesic Mixed Conifer Forest and Woodland	5	Conifer	Douglas-fir-Grand Fir-White Fir Forest and Woodland	SAF 211: White Fir	Tree-dominated	Closed tree canopy	250 <= CH < 500	Tr Mediterranean California Mesic Mixed Conifer Forest and Woodland	Tree	Evergreen closed tree canopy	40 <= CC < 50	No	Conifer
KBOFUELRASHLAND UEFO_07	78.834	125.72	1446.23	5.28	0.401989	830.07	24.36	12.6625	65	375	81	24	1258	0.588034		ac	E	12	12 <= CBD < 13	Succession Class E	0	No Disturbance	NA	Upland Forest	10280	Mediterranean California Mesic Mixed Conifer Forest and Woodland	117	Douglas Fir-White Fir-Sugar Pine-1	Conifer	106	Tree Cover >= 60 and < 70%	2	Oregon Coastal Range	1000	Mediterranean California Mesic Mixed Conifer Forest and Woodland	5	Conifer	Douglas-fir-Ponderosa Pine-Lodgepole Pine Forest and Woodland	SAF 243: Sierra Nevada Mixed Conifer	Tree-dominated	Open tree canopy	250 <= CH < 500	Tr Mediterranean California Dry-Mesic Mixed Conifer Forest and Woodland	Tree	Evergreen open tree canopy	60 <= CC < 70	No	Conifer
KBOFUELRASHLAND WECR_02	272.515	122.258	2001.13	6.66817	0.077836	899.45	24.65	12.6125	45	375	87	19	1305	0.55243		m	E	6	6 <= CBD < 7	Succession Class D	0	No Disturbance	NA	Upland Forest	10270	Mediterranean California Dry-Mesic Mixed Conifer Forest and Woodland	116	Ponderosa Pine-Incense Cedar-1	Conifer	104	Tree Cover >= 40 and < 50%	2	Oregon Coastal Range	1000	Mediterranean California Dry-Mesic Mixed Conifer Forest and Woodland	5	Conifer	Douglas-fir-Ponderosa Pine-Lodgepole Pine Forest and Woodland	SAF 243: Sierra Nevada Mixed Conifer	Tree-dominated	Open tree canopy	250 <= CH < 500	Tr Mediterranean California Dry-Mesic Mixed Conifer Forest and Woodland	Tree	Evergreen open tree canopy	40 <= CC < 50	No	Conifer
KBOFUELRASHLAND WECR_07	120.358	122.439	1895.93	6.93617	0.259042	957.17	24.67	12.515	45	375	95	32	1270	0.437843		m	E	6	6 <= CBD < 7	Succession Class C	0	No Disturbance	NA	Upland Forest	10300	Mediterranean California Lower Montane Black Oak-Conifer Forest and Woodland	119	Ponderosa Pine-California Black Oak-1	Conifer	104	Tree Cover >= 40 and < 50%	2	Oregon Coastal Range	1000	Mediterranean California Dry-Mesic Mixed Conifer Forest and Woodland	5	Conifer	Douglas-fir Forest and Woodland	SAF 229: Pacific Douglas-Fir	Tree-dominated	Closed tree canopy	250 <= CH < 500	Tr North Pacific Dry Douglas-fir(-Madrone) Forest and Woodland	Tree	Evergreen closed tree canopy	40 <= CC < 50	No	Conifer
KBOFUELRASHLAND WFAC_10	35.5	124.4	473.477	4.71105	0.007533	713.55	27.19	13.91	75	375	86	32	934	0.422247		ac	E	16	16 <= CBD < 17	Succession Class E	0	No Disturbance	NA	Upland Forest	10270	Mediterranean California Dry-Mesic Mixed Conifer Forest and Woodland	116	Ponderosa Pine-Incense Cedar-1	Conifer	107	Tree Cover >= 70 and < 80%	2	Oregon Coastal Range	1000	Mediterranean California Dry-Mesic Mixed Conifer Forest and Woodland	5	Conifer	California Mixed Evergreen Forest and Woodland	SAF 234: Douglas-Fir-Tanoak-Pacific Madrone	Tree-dominated	Closed tree canopy	250 <= CH < 500	Tr Mediterranean California Mixed Evergreen Forest	Tree	Evergreen closed tree canopy	70 <= CC < 80	No	Conifer
KBOFUELRASHLAND WINR_11	171.257	124.111	2442.56	6.37301	0.446611	801.8	24.52	12.5325	0	0	79	29	1322	1.05156		m	W	0	Non-Forested	Succession Class A	112	Fire	Low	Upland Forest	10270	Mediterranean California Dry-Mesic Mixed Conifer Forest and Woodland	116	Ponderosa Pine-Incense Cedar-1	Conifer	102	Tree Cover >= 20 and < 30%	2	Oregon Coastal Range	1000	Mediterranean California Dry-Mesic Mixed Conifer Forest and Woodland	5	Conifer	Douglas-fir Forest and Woodland	SAF 229: Pacific Douglas-Fir	Tree-dominated	Closed tree canopy	Non-Forested	Tr North Pacific Dry Douglas-fir(-Madrone) Forest and Woodland	Tree	Evergreen closed tree canopy	Non-Forested	No	Conifer
KBOFUELRKLAMATHMARSHKIT2_01	879.598	223.261	184.614	17.1429	14.823	518.23	31	10.365	25	175	53	0	1379	0.7556		x	Flat	4	4 <= CBD < 5	Succession Class C	0	No Disturbance	NA	Wetland Herb	11670	Rocky Mountain Poor-Site Lodgepole Pine Forest	266	Lodgepole Pine-Kinnikinnick-4	Conifer	102	Tree Cover >= 20 and < 30%	7	Cascade Mountain Range	1000	Northern Rocky Mountain Dry-Mesic Montane Mixed Conifer Forest	9	Conifer	Douglas-fir-Ponderosa Pine-Lodgepole Pine Forest and Woodland	SAF 218: Lodgepole Pine	Tree-dominated	Open tree canopy	100 <= CH < 250	Tr North Pacific Wooded Volcanic Flowage	Tree	Evergreen open tree canopy	20 <= CC < 30	No	Conifer
KBOFUELRKLAMATHMARSHLWCZ_04	330.39	220.115	0	10.696	10.6718	589.16	30.61	10.5275	0	0	57	0	1376	0.757518		m	NW	0	Non-Forested	Uncharacteristic Exotic Vegetation	112	Fire	Low	Wetland Herb	11540	Inter-Mountain Basins Montane Riparian Systems	259	Black Cottonwood-Narrowleaf Willow-3	Riparian	125	Herb Cover >= 50 and < 60%	7	Cascade Mountain Range	1200	Inter-Mountain Basins Montane Riparian Systems	9	Exotic Herbaceous	Introduced Perennial Grassland and Forbland	LF 54: Introduced Upland Vegetation - Herbaceous	Herbaceous / Nonvascular-dominated	Herbaceous - grassland	Non-Forested	He Introduced Upland Vegetation-Perennial Grassland and Forbland	Herb	Perennial graminoid grassland	Non-Forested	No	Conifer
KBOFUELRKLAMATHMARSHLWEL_02	423.749	220.505	145.074	17.6003	15.7603	586.02	31.02	10.3375	55	175	55	0	1378	0.7556		ah	Flat	11	11 <= CBD < 12	Succession Class C	0	No Disturbance	NA	Upland Forest	11540	Inter-Mountain Basins Montane Riparian Systems	259	Black Cottonwood-Narrowleaf Willow-3	Riparian	105	Tree Cover >= 50 and < 60%	7	Cascade Mountain Range	1200	Inter-Mountain Basins Montane Riparian Systems	5	Riparian	Western Riparian Woodland and Shrubland	SAF 235: Cottonwood-Willow	Tree-dominated	Open tree canopy	100 <= CH < 250	Tr Inter-Mountain Basins Montane Riparian Systems	Tree	Mixed evergreen-deciduous open tree canopy	50 <= CC < 60	No	Shrubland
KBOFUELRKLAMATHMARSHLWEZ_02	1200.9	220.011	177.639	17.5425	16.0232	597.3	31.05	10.38	45	175	46	0	1379	0.7556		n	Flat	8	8 <= CBD < 9	Succession Class C	0	No Disturbance	NA	Wetland Forest	11540	Inter-Mountain Basins Montane Riparian Systems	259	Black Cottonwood-Narrowleaf Willow-3	Riparian	104	Tree Cover >= 40 and < 50%	7	Cascade Mountain Range	1200	Inter-Mountain Basins Montane Riparian Systems	7	Riparian	Western Riparian Woodland and Shrubland	SAF 235: Cottonwood-Willow	Tree-dominated	Open tree canopy	100 <= CH < 250	Tr Inter-Mountain Basins Montane Riparian Systems	Tree	Mixed evergreen-deciduous open tree canopy	40 <= CC < 50	No	Conifer
KBOFUELRKLAMATHMARSHNWKM_02	3520.49	216.934	157.628	14.9247	13.9579	671.05	30.75	10.0975	25	175	58	1	1383	0.777427		m	S	4	4 <= CBD < 5	Succession Class C	0	No Disturbance	NA	Upland Woodland	11540	Inter-Mountain Basins Montane Riparian Systems	259	Black Cottonwood-Narrowleaf Willow-3	Riparian	102	Tree Cover >= 20 and < 30%	7	Cascade Mountain Range	1200	Inter-Mountain Basins Montane Riparian Systems	4	Riparian	Western Riparian Woodland and Shrubland	SAF 235: Cottonwood-Willow	Tree-dominated	Open tree canopy	100 <= CH < 250	Tr Inter-Mountain Basins Montane Riparian Systems	Tree	Mixed evergreen-deciduous open tree canopy	20 <= CC < 30	No	Conifer
KBOFUELRKLAMATHMARSHTCRI_02	1561.79	217.214	48.791	14.1348	12.3132	610.77	30.93	10.295	65	375	43	1	1378	0.763111		ah	SE	12	12 <= CBD < 13	Succession Class C	0	No Disturbance	NA	Upland Forest	11540	Inter-Mountain Basins Montane Riparian Systems	259	Black Cottonwood-Narrowleaf Willow-3	Riparian	106	Tree Cover >= 60 and < 70%	7	Cascade Mountain Range	1200	Inter-Mountain Basins Montane Riparian Systems	5	Riparian	Western Riparian Woodland and Shrubland	SAF 235: Cottonwood-Willow	Tree-dominated	Open tree canopy	250 <= CH < 500	Tr Inter-Mountain Basins Montane Riparian Systems	Tree	Mixed evergreen-deciduous open tree canopy	60 <= CC < 70	No	Shrubland
KBOFUELRKLAMATHMARSHWPTZ_08	1343.35	218.357	560.776	13.9656	11.5481	577.24	30.97	10.3225	15	175	59	0	1377	0.7556		x	Flat	3	3 <= CBD < 4	Succession Class B	0	No Disturbance	NA	Wetland Herb	11582	North Pacific Montane Riparian Woodland and Shrubland - Dry	258	White Alder-Devils Club-5	Riparian	101	Tree Cover >= 10 and < 20%	7	Cascade Mountain Range	1200	Inter-Mountain Basins Montane Riparian Systems	9	Riparian	Western Riparian Woodland and Shrubland	SAF 222: Black Cottonwood-Willow	Tree-dominated	Open tree canopy	100 <= CH < 250	Tr North Pacific Montane Riparian Woodland and Shrubland	Tree	Mixed evergreen-deciduous open tree canopy	10 <= CC < 20	No	Conifer
KBOFUELRKLAMATHNF 2NDV_02	178.631	81.984	1593.46	0.674166	0.055191	587.17	30.15	15.8975	65	375	79	44	868	0.817545		m	NW	12	12 <= CBD < 13	Succession Class E	0	No Disturbance	NA	Upland Forest	10270	Mediterranean California Dry-Mesic Mixed Conifer Forest and Woodland	116	Ponderosa Pine-Incense Cedar-1	Conifer	106	Tree Cover >= 60 and < 70%	3	Northern California Coastal Range	1000	Mediterranean California Dry-Mesic Mixed Conifer Forest and Woodland	5	Conifer	Douglas-fir-Ponderosa Pine-Lodgepole Pine Forest and Woodland	SAF 243: Sierra Nevada Mixed Conifer	Tree-dominated	Open tree canopy	250 <= CH < 500	Tr Mediterranean California Dry-Mesic Mixed Conifer Forest and Woodland	Tree	Evergreen open tree canopy	60 <= CC < 70	No	Conifer
KBOFUELRKLAMATHNF 2NDV_11	462.742	81.2532	3128.31	2.18836	0.362096	634.18	29.22	15.4975	55	375	79	32	1165	1.04786		m	W	9	9 <= CBD < 10	Succession Class D	0	No Disturbance	NA	Upland Forest	10270	Mediterranean California Dry-Mesic Mixed Conifer Forest and Woodland	116	Ponderosa Pine-Incense Cedar-1	Conifer	105	Tree Cover >= 50 and < 60%	3	Northern California Coastal Range	1000	Mediterranean California Mesic Mixed Conifer Forest and Woodland	5	Conifer	Douglas-fir-Ponderosa Pine-Lodgepole Pine Forest and Woodland	SAF 243: Sierra Nevada Mixed Conifer	Tree-dominated	Open tree canopy	250 <= CH < 500	Tr Mediterranean California Dry-Mesic Mixed Conifer Forest and Woodland	Tree	Evergreen open tree canopy	50 <= CC < 60	No	Conifer
KBOFUELRKLAMATHNF ANT1_PC03	128.838	177.368	1573.68	10.5372	0.807572	1225.23	28.09	11.985	55	375	65	2	1658	0.791427		l	S	9	9 <= CBD < 10	Succession Class E	0	No Disturbance	NA	Wetland Forest	10280	Mediterranean California Mesic Mixed Conifer Forest and Woodland	117	Douglas Fir-White Fir-Sugar Pine-1	Conifer	105	Tree Cover >= 50 and < 60%	7	Cascade Mountain Range	1000	Mediterranean California Mesic Mixed Conifer Forest and Woodland	7	Conifer	Douglas-fir-Grand Fir-White Fir Forest and Woodland	SAF 211: White Fir	Tree-dominated	Closed tree canopy	250 <= CH < 500	Tr Mediterranean California Mesic Mixed Conifer Forest and Woodland	Tree	Evergreen closed tree canopy	50 <= CC < 60	No	Conifer
KBOFUELRKLAMATHNF BEAR_16	272.002	110.183	4555.77	9.31566	0.17118	708.27	29.09	15.185	75	375	92	13	951	0.599093		m	N	16	16 <= CBD < 17	Succession Class E	0	No Disturbance	NA	Upland Forest	10270	Mediterranean California Dry-Mesic Mixed Conifer Forest and Woodland	116	Ponderosa Pine-Incense Cedar-1	Conifer	107	Tree Cover >= 70 and < 80%	3	Northern California Coastal Range	1000	Mediterranean California Dry-Mesic Mixed Conifer Forest and Woodland	5	Conifer	Douglas-fir-Ponderosa Pine-Lodgepole Pine Forest and Woodland	SAF 243: Sierra Nevada Mixed Conifer	Tree-dominated	Open tree canopy	250 <= CH < 500	Tr Mediterranean California Dry-Mesic Mixed Conifer Forest and Woodland	Tree	Evergreen open tree canopy	70 <= CC < 80	No	Conifer
KBOFUELRKLAMATHNF BLUE_07	952.755	101.701	1297.81	1.68107	0.039153	1061.76	26.48	11.165	35	175	57	12	1820	0.759202		i	NW	6	6 <= CBD < 7	Succession Class C	0	No Disturbance	NA	Upland Woodland	10280	Mediterranean California Mesic Mixed Conifer Forest and Woodland	117	Douglas Fir-White Fir-Sugar Pine-1	Conifer	103	Tree Cover >= 30 and < 40%	3	Northern California Coastal Range	1000	Mediterranean California Red Fir Forest	4	Conifer	Douglas-fir-Grand Fir-White Fir Forest and Woodland	SAF 211: White Fir	Tree-dominated	Closed tree canopy	100 <= CH < 250	Tr Mediterranean California Mesic Mixed Conifer Forest and Woodland	Tree	Evergreen closed tree canopy	30 <= CC < 40	No	Conifer
KBOFUELRKLAMATHNF BLUE_09	1218.44	102.5	1874.13	2.38533	0.0674	1513.21	25.69	9.555	55	175	58	10	1854	0.691484		n	N	11	11 <= CBD < 12	Succession Class B	0	No Disturbance	NA	Upland Forest	10320	Mediterranean California Red Fir Forest	121	Red Fir-1	Conifer	105	Tree Cover >= 50 and < 60%	3	Northern California Coastal Range	1000	Mediterranean California Red Fir Forest	5	Conifer	Red Fir Forest and Woodland	SAF 207: Red Fir	Tree-dominated	Open tree canopy	100 <= CH < 250	Tr Mediterranean California Red Fir Forest	Tree	Evergreen open tree canopy	50 <= CC < 60	No	Conifer
KBOFUELRKLAMATHNF BLUE_15	906.918	101.795	1076.52	1.64754	0.140607	1789.94	25.6	9.25	45	175	68	18	1970	0.802051		m	NW	8	8 <= CBD < 9	Succession Class B	0	No Disturbance	NA	Upland Forest	10320	Mediterranean California Red Fir Forest	121	Red Fir-1	Conifer	104	Tree Cover >= 40 and < 50%	3	Northern California Coastal Range	1000	Mediterranean California Red Fir Forest	5	Conifer	Red Fir Forest and Woodland	SAF 207: Red Fir	Tree-dominated	Open tree canopy	100 <= CH < 250	Tr Mediterranean California Red Fir Forest	Tree	Evergreen open tree canopy	40 <= CC < 50	No	Conifer
KBOFUELRKLAMATHNF BOCR_03	52.777	83.0965	2988.49	2.20045	0.010287	807.91	29.81	14.7375	55	175	87	23	1174	0.455629		r	NE	11	11 <= CBD < 12	Succession Class C	211	Mechanical Add	Low	Upland Forest	10280	Mediterranean California Mesic Mixed Conifer Forest and Woodland	117	Douglas Fir-White Fir-Sugar Pine-1	Conifer	105	Tree Cover >= 50 and < 60%	3	Northern California Coastal Range	1000	Mediterranean California Mesic Mixed Conifer Forest and Woodland	5	Conifer	Douglas-fir-Grand Fir-White Fir Forest and Woodland	SAF 211: White Fir	Tree-dominated	Closed tree canopy	100 <= CH < 250	Tr Mediterranean California Mesic Mixed Conifer Forest and Woodland	Tree	Evergreen closed tree canopy	50 <= CC < 60	No	Conifer
KBOFUELRKLAMATHNF BOCR_18	148.738	82.7545	2784.01	2.55494	0.388411	923.38	27.21	13.1575	55	375	94	27	1400	0.401103		m	NE	9	9 <= CBD < 10	Succession Class D	0	No Disturbance	NA	Upland Forest	10280	Mediterranean California Mesic Mixed Conifer Forest and Woodland	117	Douglas Fir-White Fir-Sugar Pine-1	Conifer	105	Tree Cover >= 50 and < 60%	3	Northern California Coastal Range	1000	Mediterranean California Mesic Mixed Conifer Forest and Woodland	5	Conifer	Douglas-fir-Grand Fir-White Fir Forest and Woodland	SAF 211: White Fir	Tree-dominated	Closed tree canopy	250 <= CH < 500	Tr Mediterranean California Mesic Mixed Conifer Forest and Woodland	Tree	Evergreen closed tree canopy	50 <= CC < 60	No	Conifer
KBOFUELRKLAMATHNF BUG1_10	193.963	119.803	2932.8	3.04555	0.157785	478.05	30.88	15.8275	0	0	59	34	749	0.98845		s	S	0	Non-Forested	Succession Class A	0	No Disturbance	NA	Upland Shrub	10990	California Xeric Serpentine Chaparral	200	Chamise-Scrub Oak-4	Shrubland	113	Shrub Cover >= 30 and < 40%	3	Northern California Coastal Range	1100	California Xeric Serpentine Chaparral	3	Shrubland	Chaparral	SRM 209: Montane Shrubland	Shrub-dominated	Shrubland	Non-Forested	Sh California Xeric Serpentine Chaparral	Shrub	Evergreen shrubland	Non-Forested	No	Mixed
KBOFUELRKLAMATHNF BUG1_13	237.469	119.332	3793.21	3.8359	0.131872	490.83	29.59	15.77	0	0	62	29	808	0.81989		e	SE	0	Non-Forested	Succession Class A	0	No Disturbance	NA	Upland Shrub	10990	California Xeric Serpentine Chaparral	200	Chamise-Scrub Oak-4	Shrubland	112	Shrub Cover >= 20 and < 30%	3	Northern California Coastal Range	1100	California Xeric Serpentine Chaparral	3	Shrubland	Chaparral	SRM 209: Montane Shrubland	Shrub-dominated	Shrubland	Non-Forested	Sh California Xeric Serpentine Chaparral	Shrub	Evergreen shrubland	Non-Forested	No	Mixed
KBOFUELRKLAMATHNF BUG1_20	223.44	117.493	5775.25	6.28441	0.000294	501.74	30.5	15.8575	0	0	62	21	849	0.737935		s	SE	0	Non-Forested	Succession Class A	0	No Disturbance	NA	Upland Shrub	11050	Northern and Central California Dry-Mesic Chaparral	208	Chamise-Manzanita-4	Shrubland	111	Shrub Cover >= 10 and < 20%	3	Northern California Coastal Range	1000	Mediterranean California Dry-Mesic Mixed Conifer Forest and Woodland	3	Shrubland	Chaparral	SRM 206: Chamise Chaparral	Shrub-dominated	Shrubland	Non-Forested	Sh Northern and Central California Dry-Mesic Chaparral	Shrub	Evergreen shrubland	Non-Forested	No	Mixed
KBOFUELRKLAMATHNF BUG3_12	924.797	120.068	3457.09	4.992	0.099962	514.23	29.33	15.32	75	375	68	20	1003	0.472351		r	NE	16	16 <= CBD < 17	Succession Class E	0	No Disturbance	NA	Upland Forest	10270	Mediterranean California Dry-Mesic Mixed Conifer Forest and Woodland	116	Ponderosa Pine-Incense Cedar-1	Conifer	107	Tree Cover >= 70 and < 80%	7	Cascade Mountain Range	1000	Mediterranean California Dry-Mesic Mixed Conifer Forest and Woodland	5	Conifer	Douglas-fir-Ponderosa Pine-Lodgepole Pine Forest and Woodland	SAF 243: Sierra Nevada Mixed Conifer	Tree-dominated	Open tree canopy	250 <= CH < 500	Tr Mediterranean California Dry-Mesic Mixed Conifer Forest and Woodland	Tree	Evergreen open tree canopy	70 <= CC < 80	No	Conifer
KBOFUELRKLAMATHNF BUMB_04	1397.18	113.705	2926.58	9.43146	0.345011	759.1	26.23	13.0075	65	175	83	18	1291	0.778817		s	SE	16	16 <= CBD < 17	Succession Class B	0	No Disturbance	NA	Upland Forest	10270	Mediterranean California Dry-Mesic Mixed Conifer Forest and Woodland	116	Ponderosa Pine-Incense Cedar-1	Conifer	106	Tree Cover >= 60 and < 70%	3	Northern California Coastal Range	1000	Mediterranean California Dry-Mesic Mixed Conifer Forest and Woodland	5	Conifer	Douglas-fir-Ponderosa Pine-Lodgepole Pine Forest and Woodland	SAF 243: Sierra Nevada Mixed Conifer	Tree-dominated	Open tree canopy	100 <= CH < 250	Tr Mediterranean California Dry-Mesic Mixed Conifer Forest and Woodland	Tree	Evergreen open tree canopy	60 <= CC < 70	No	Mixed
KBOFUELRKLAMATHNF BUMB_07	854.485	113.941	3086.11	10.1993	0.644564	731.38	26.15	13.245	75	375	82	20	1286	0.547328		m	N	16	16 <= CBD < 17	Succession Class E	0	No Disturbance	NA	Upland Forest	10280	Mediterranean California Mesic Mixed Conifer Forest and Woodland	117	Douglas Fir-White Fir-Sugar Pine-1	Conifer	107	Tree Cover >= 70 and < 80%	3	Northern California Coastal Range	1000	Mediterranean California Mesic Mixed Conifer Forest and Woodland	5	Conifer	Douglas-fir-Grand Fir-White Fir Forest and Woodland	SAF 211: White Fir	Tree-dominated	Closed tree canopy	250 <= CH < 500	Tr Mediterranean California Mesic Mixed Conifer Forest and Woodland	Tree	Evergreen closed tree canopy	70 <= CC < 80	No	Conifer
KBOFUELRKLAMATHNF BVR1_03	39.354	110.756	2312.86	0.42	0.01716	605.8	30.11	15.845	45	175	61	2	542	0.763907		m	SE	8	8 <= CBD < 9	Succession Class C	0	No Disturbance	NA	Upland Forest	10270	Mediterranean California Dry-Mesic Mixed Conifer Forest and Woodland	116	Ponderosa Pine-Incense Cedar-1	Conifer	104	Tree Cover >= 40 and < 50%	3	Northern California Coastal Range	1000	Mediterranean California Dry-Mesic Mixed Conifer Forest and Woodland	5	Conifer	Douglas-fir-Ponderosa Pine-Lodgepole Pine Forest and Woodland	SAF 243: Sierra Nevada Mixed Conifer	Tree-dominated	Open tree canopy	100 <= CH < 250	Tr Mediterranean California Dry-Mesic Mixed Conifer Forest and Woodland	Tree	Evergreen open tree canopy	40 <= CC < 50	No	Conifer
KBOFUELRKLAMATHNF BVR1_13	235.496	110.761	5502.02	3.69	0.009022	649.88	29.72	15.815	0	0	82	22	683	0.586849		s	E	0	Non-Forested	Succession Class D	0	No Disturbance	NA	Upland Shrub	10270	Mediterranean California Dry-Mesic Mixed Conifer Forest and Woodland	116	Ponderosa Pine-Incense Cedar-1	Conifer	111	Shrub Cover >= 10 and < 20%	3	Northern California Coastal Range	1000	Mediterranean California Dry-Mesic Mixed Conifer Forest and Woodland	3	Shrubland	Chaparral	SRM 209: Montane Shrubland	Shrub-dominated	Shrubland	Non-Forested	Sh California Montane Woodland and Chaparral	Shrub	Evergreen shrubland	Non-Forested	No	Mixed
KBOFUELRKLAMATHNF BVR1_20	243.174	111.062	5499.99	6.18182	0.007308	664.68	29.98	15.49	0	0	84	19	748	0.806874		y	SE	0	Non-Forested	Succession Class A	0	No Disturbance	NA	Upland Shrub	10270	Mediterranean California Dry-Mesic Mixed Conifer Forest and Woodland	116	Ponderosa Pine-Incense Cedar-1	Conifer	125	Herb Cover >= 50 and < 60%	3	Northern California Coastal Range	1000	Mediterranean California Dry-Mesic Mixed Conifer Forest and Woodland	3	Grassland	Grassland	SRM 102: Idaho Fescue	Herbaceous / Nonvascular-dominated	Herbaceous - grassland	Non-Forested	He North Pacific Montane Grassland	Herb	Perennial graminoid grassland	Non-Forested	No	Conifer
KBOFUELRKLAMATHNF BVR2_05	95.269	111.168	5174.23	9.27485	0.067225	701.21	29.03	15.21	0	0	83	34	889	1.04344		e	SW	0	Non-Forested	Succession Class D	0	No Disturbance	NA	Upland Shrub	10270	Mediterranean California Dry-Mesic Mixed Conifer Forest and Woodland	116	Ponderosa Pine-Incense Cedar-1	Conifer	111	Shrub Cover >= 10 and < 20%	3	Northern California Coastal Range	1000	Mediterranean California Dry-Mesic Mixed Conifer Forest and Woodland	3	Shrubland	Chaparral	SRM 209: Montane Shrubland	Shrub-dominated	Shrubland	Non-Forested	Sh California Montane Woodland and Chaparral	Shrub	Evergreen shrubland	Non-Forested	No	Mixed
KBOFUELRKLAMATHNF BVR2_11	46.397	112.669	3722.56	8.05029	0.017069	677.34	29.76	15.285	55	375	80	32	758	1.06746		m	W	9	9 <= CBD < 10	Succession Class D	0	No Disturbance	NA	Upland Forest	10270	Mediterranean California Dry-Mesic Mixed Conifer Forest and Woodland	116	Ponderosa Pine-Incense Cedar-1	Conifer	105	Tree Cover >= 50 and < 60%	3	Northern California Coastal Range	1000	Mediterranean California Dry-Mesic Mixed Conifer Forest and Woodland	5	Conifer	Douglas-fir-Ponderosa Pine-Lodgepole Pine Forest and Woodland	SAF 243: Sierra Nevada Mixed Conifer	Tree-dominated	Open tree canopy	250 <= CH < 500	Tr Mediterranean California Dry-Mesic Mixed Conifer Forest and Woodland	Tree	Evergreen open tree canopy	50 <= CC < 60	No	Conifer
KBOFUELRKLAMATHNF BVR2_20	228.038	114.898	1632.26	9.34292	0.182314	697.35	28.99	15.08	55	175	73	15	916	0.744938		r	SE	11	11 <= CBD < 12	Succession Class C	0	No Disturbance	NA	Upland Forest	11520	California Montane Riparian Systems	249	Black Cottonwood-Arroyo Willow-Madrone-3	Riparian	105	Tree Cover >= 50 and < 60%	3	Northern California Coastal Range	1200	California Montane Riparian Systems	5	Conifer	Douglas-fir-Ponderosa Pine-Lodgepole Pine Forest and Woodland	SAF 243: Sierra Nevada Mixed Conifer	Tree-dominated	Open tree canopy	100 <= CH < 250	Tr Mediterranean California Dry-Mesic Mixed Conifer Forest and Woodland	Tree	Evergreen open tree canopy	50 <= CC < 60	No	Conifer
KBOFUELRKLAMATHNF CRT1_10	101.593	98.1537	1189.19	0.708025	0.019164	1668.18	26.6	10.82	45	375	61	12	1697	0.895239		m	W	6	6 <= CBD < 7	Succession Class D	0	No Disturbance	NA	Upland Forest	10280	Mediterranean California Mesic Mixed Conifer Forest and Woodland	117	Douglas Fir-White Fir-Sugar Pine-1	Conifer	104	Tree Cover >= 40 and < 50%	3	Northern California Coastal Range	1000	Mediterranean California Mesic Mixed Conifer Forest and Woodland	5	Conifer	Douglas-fir-Grand Fir-White Fir Forest and Woodland	SAF 211: White Fir	Tree-dominated	Closed tree canopy	250 <= CH < 500	Tr Mediterranean California Mesic Mixed Conifer Forest and Woodland	Tree	Evergreen closed tree canopy	40 <= CC < 50	No	Conifer
KBOFUELRKLAMATHNF CRT1_17	16.472	96.7308	2134.32	0.305941	0.182563	1621.35	26.52	12.155	55	375	85	8	1607	0.852034		l	SW	9	9 <= CBD < 10	Succession Class D	0	No Disturbance	NA	Upland Forest	10280	Mediterranean California Mesic Mixed Conifer Forest and Woodland	117	Douglas Fir-White Fir-Sugar Pine-1	Conifer	105	Tree Cover >= 50 and < 60%	3	Northern California Coastal Range	1000	Mediterranean California Mesic Mixed Conifer Forest and Woodland	5	Conifer	Douglas-fir-Grand Fir-White Fir Forest and Woodland	SAF 211: White Fir	Tree-dominated	Closed tree canopy	250 <= CH < 500	Tr Mediterranean California Mesic Mixed Conifer Forest and Woodland	Tree	Evergreen closed tree canopy	50 <= CC < 60	No	Conifer
KBOFUELRKLAMATHNF DED1_10	16.558	108.13	4982.86	9.59297	0.025883	794.53	27.99	13.8825	35	175	82	14	1159	0.690056		p	E	1	1 <= CBD < 2	Burnable Urban	0	No Disturbance	NA	Upland Woodland	11520	California Montane Riparian Systems	249	Black Cottonwood-Arroyo Willow-Madrone-3	Riparian	13	Developed-Upland Deciduous Forest	3	Northern California Coastal Range	1200	California Montane Riparian Systems	4	Developed	Developed-Upland Deciduous Forest	LF 20: Developed	Tree-dominated	Open tree canopy	100 <= CH < 250	Dtd Urban Deciduous Forest	Tree	Deciduous open tree canopy	30 <= CC < 40	No	Mixed
KBOFUELRKLAMATHNF DED1_15	61.771	108.067	3976.59	8.00725	0.081053	654.83	28.79	15.1825	0	0	68	29	1059	0.736647		r	SE	0	Non-Forested	Succession Class A	0	No Disturbance	NA	Upland Shrub	10970	California Mesic Chaparral	200	Chamise-Scrub Oak-4	Shrubland	111	Shrub Cover >= 10 and < 20%	3	Northern California Coastal Range	1100	California Mesic Chaparral	3	Shrubland	Chaparral	SRM 207: Scrub Oak Mixed Chaparral	Shrub-dominated	Shrubland	Non-Forested	Sh California Mesic Chaparral	Shrub	Evergreen shrubland	Non-Forested	No	Conifer
KBOFUELRKLAMATHNF ELK1_15	12.158	62.6151	251.276	6.2021	0.034482	1488.1	30.98	16.69	75	375	92	6	522	0.747796		s	E	16	16 <= CBD < 17	Succession Class C	112	Fire	Low	Upland Forest	11520	California Montane Riparian Systems	249	Black Cottonwood-Arroyo Willow-Madrone-3	Riparian	107	Tree Cover >= 70 and < 80%	3	Northern California Coastal Range	1200	California Montane Riparian Systems	5	Riparian	Western Riparian Woodland and Shrubland	SRM 203: Riparian Woodland	Tree-dominated	Open tree canopy	250 <= CH < 500	Tr California Montane Riparian Systems	Tree	Mixed evergreen-deciduous open tree canopy	70 <= CC < 80	No	Mixed
KBOFUELRKLAMATHNF FRNK_09	243.324	92.8702	1168.29	1.56978	1.31957	576.04	29.13	15.9925	0	0	84	13	949	0.898032		r	SW	0	Non-Forested	Succession Class A	0	No Disturbance	NA	Upland Forest	10270	Mediterranean California Dry-Mesic Mixed Conifer Forest and Woodland	116	Ponderosa Pine-Incense Cedar-1	Conifer	103	Tree Cover >= 30 and < 40%	3	Northern California Coastal Range	1000	Mediterranean California Dry-Mesic Mixed Conifer Forest and Woodland	5	Conifer	Douglas-fir-Ponderosa Pine-Lodgepole Pine Forest and Woodland	SAF 243: Sierra Nevada Mixed Conifer	Tree-dominated	Open tree canopy	Non-Forested	Tr Mediterranean California Dry-Mesic Mixed Conifer Forest and Woodland	Tree	Evergreen open tree canopy	Non-Forested	No	Conifer
KBOFUELRKLAMATHNF FRNK_16	79.653	92.7604	1547.67	1.31898	1.32218	576.04	29.13	15.9925	0	0	82	30	826	1.0068		r	SW	0	Non-Forested	Succession Class A	0	No Disturbance	NA	Upland Forest	10270	Mediterranean California Dry-Mesic Mixed Conifer Forest and Woodland	116	Ponderosa Pine-Incense Cedar-1	Conifer	103	Tree Cover >= 30 and < 40%	3	Northern California Coastal Range	1000	Mediterranean California Dry-Mesic Mixed Conifer Forest and Woodland	5	Conifer	Douglas-fir-Ponderosa Pine-Lodgepole Pine Forest and Woodland	SAF 243: Sierra Nevada Mixed Conifer	Tree-dominated	Open tree canopy	Non-Forested	Tr Mediterranean California Dry-Mesic Mixed Conifer Forest and Woodland	Tree	Evergreen open tree canopy	Non-Forested	No	Conifer
KBOFUELRKLAMATHNF GNA_08	1064.53	161.846	1497.09	10.3868	9.56197	851.08	29.25	10.85	25	175	63	12	1791	0.768002		m	SE	4	4 <= CBD < 5	Succession Class C	0	No Disturbance	NA	Upland Woodland	10320	Mediterranean California Red Fir Forest	121	Red Fir-1	Conifer	102	Tree Cover >= 20 and < 30%	7	Cascade Mountain Range	1000	Mediterranean California Red Fir Forest	4	Conifer	Red Fir Forest and Woodland	SAF 207: Red Fir	Tree-dominated	Open tree canopy	100 <= CH < 250	Tr Mediterranean California Red Fir Forest	Tree	Evergreen open tree canopy	20 <= CC < 30	No	Conifer
KBOFUELRKLAMATHNF GNA_12	1708.41	162.198	3968.45	13.0293	10.8153	732.49	28.5	11.105	0	0	72	11	1823	0.68906		m	N	0	Non-Forested	Succession Class B	0	No Disturbance	NA	Upland Forest	11720	Sierran-Intermontane Desert Western White Pine-White Fir Woodland	270	Western White Pine-White Fir-1	Conifer	104	Tree Cover >= 40 and < 50%	7	Cascade Mountain Range	1000	Mediterranean California Red Fir Forest	5	Conifer	Douglas-fir-Grand Fir-White Fir Forest and Woodland	SAF 211: White Fir	Tree-dominated	Open tree canopy	Non-Forested	Tr Sierran-Intermontane Desert Western White Pine-White Fir Woodland	Tree	Evergreen open tree canopy	Non-Forested	No	Conifer
KBOFUELRKLAMATHNF GNA_27	1303.36	160.153	2568.21	7.44635	6.88064	969.39	27.83	9.9825	35	175	77	10	1949	0.877925		m	W	6	6 <= CBD < 7	Succession Class C	0	No Disturbance	NA	Upland Forest	11720	Sierran-Intermontane Desert Western White Pine-White Fir Woodland	270	Western White Pine-White Fir-1	Conifer	103	Tree Cover >= 30 and < 40%	7	Cascade Mountain Range	1000	Mediterranean California Red Fir Forest	5	Conifer	Douglas-fir-Grand Fir-White Fir Forest and Woodland	SAF 211: White Fir	Tree-dominated	Open tree canopy	100 <= CH < 250	Tr Sierran-Intermontane Desert Western White Pine-White Fir Woodland	Tree	Evergreen open tree canopy	30 <= CC < 40	No	Conifer
KBOFUELRKLAMATHNF GNB_13	4543.83	180.959	1760.69	24.33	23.7294	357.16	30.01	12.325	0	0	17	0	1293	0.7556		ah	Flat	0	Non-Forested	Burnable Agriculture	0	No Disturbance	NA	Upland Shrub	11230	Columbia Plateau Steppe and Grassland	218	Indian Ricegrass-Squirreltail-4	Grassland	123	Herb Cover >= 30 and < 40%	7	Cascade Mountain Range	1100	Inter-Mountain Basins Big Sagebrush Shrubland	3	Agricultural	Agricultural-Fallow/Idle Cropland	LF 80: Agriculture	Herbaceous / Nonvascular-dominated	Herbaceous - grassland	Non-Forested	Dab Fallow/Idle Cropland	Herb	Annual Graminoid/Forb	Non-Forested	No	Shrubland
KBOFUELRKLAMATHNF GNB_16	3836.74	181.506	444.542	24.2959	23.265	367.92	29.93	12.335	0	0	48	0	1293	0.7556		ah	Flat	0	Non-Forested	Succession Class B	0	No Disturbance	NA	Upland Shrub	11250	Inter-Mountain Basins Big Sagebrush Steppe	220	Wyoming Big Sage-Wheatgrass-3	Shrubland	111	Shrub Cover >= 10 and < 20%	7	Cascade Mountain Range	1100	Inter-Mountain Basins Big Sagebrush Shrubland	3	Shrubland	Big Sagebrush Shrubland and Steppe	SRM 403: Wyoming Big Sagebrush	Shrub-dominated	Shrubland	Non-Forested	Sh Inter-Mountain Basins Big Sagebrush Shrubland	Shrub	Evergreen shrubland	Non-Forested	No	Shrubland
KBOFUELRKLAMATHNF GNB_30	9248.01	177.216	2574.65	17.3421	17.1745	323.47	30.69	12.375	0	0	15	0	1293	0.7556		ah	Flat	0	Non-Forested	Succession Class B	0	No Disturbance	NA	Upland Shrub	11240	Columbia Plateau Low Sagebrush Steppe	219	Low Sage-Idaho Fescue-3	Shrubland	111	Shrub Cover >= 10 and < 20%	7	Cascade Mountain Range	1100	Inter-Mountain Basins Big Sagebrush Shrubland	3	Shrubland	Big Sagebrush Shrubland and Steppe	SRM 403: Wyoming Big Sagebrush	Shrub-dominated	Shrubland	Non-Forested	Sh Inter-Mountain Basins Big Sagebrush Shrubland	Shrub	Evergreen shrubland	Non-Forested	No	Shrubland
KBOFUELRKLAMATHNF GNC_05	7728.68	185.547	1443.26	3.2184	3.0441	370.26	29.35	12.535	25	175	41	3	1396	0.799121		n	S	4	4 <= CBD < 5	Succession Class C	0	No Disturbance	NA	Upland Woodland	10270	Mediterranean California Dry-Mesic Mixed Conifer Forest and Woodland	116	Ponderosa Pine-Incense Cedar-1	Conifer	102	Tree Cover >= 20 and < 30%	7	Cascade Mountain Range	1000	Mediterranean California Dry-Mesic Mixed Conifer Forest and Woodland	4	Conifer	Ponderosa Pine Forest, Woodland and Savanna	SAF 237: Interior Ponderosa Pine	Tree-dominated	Open tree canopy	100 <= CH < 250	Tr Northern Rocky Mountain Ponderosa Pine Woodland and Savanna	Tree	Evergreen open tree canopy	20 <= CC < 30	No	Conifer
KBOFUELRKLAMATHNF GNC_11	11513.7	189.127	1140.47	6.97085	6.50108	327.88	29.53	12.54	0	0	40	1	1347	0.732262		i	NE	0	Non-Forested	Succession Class B	0	No Disturbance	NA	Upland Woodland	10170	Columbia Plateau Western Juniper Woodland and Savanna	108	Western Juniper-Low Sage-3	Conifer	112	Shrub Cover >= 20 and < 30%	7	Cascade Mountain Range	1000	Columbia Plateau Western Juniper Woodland and Savanna	4	Shrubland	Big Sagebrush Shrubland and Steppe	SRM 403: Wyoming Big Sagebrush	Shrub-dominated	Shrubland	Non-Forested	Sh Inter-Mountain Basins Big Sagebrush Shrubland	Shrub	Evergreen shrubland	Non-Forested	No	Conifer
KBOFUELRKLAMATHNF GNC_25	8800.92	192.243	1140.16	10.7013	10.283	320.68	29.53	12.5675	0	0	53	0	1341	0.7556		ag	Flat	0	Non-Forested	Burnable Agriculture	0	No Disturbance	NA	Upland Shrub	11250	Inter-Mountain Basins Big Sagebrush Steppe	220	Wyoming Big Sage-Wheatgrass-3	Shrubland	123	Herb Cover >= 30 and < 40%	7	Cascade Mountain Range	1100	Inter-Mountain Basins Big Sagebrush Shrubland	3	Agricultural	Agricultural-Fallow/Idle Cropland	LF 80: Agriculture	Herbaceous / Nonvascular-dominated	Herbaceous - grassland	Non-Forested	Dab Fallow/Idle Cropland	Herb	Annual Graminoid/Forb	Non-Forested	No	Shrubland
KBOFUELRKLAMATHNF GND_08	10442.3	196.279	1957.68	10.0491	8.05574	613.86	27.84	12.26	45	375	75	4	1649	0.736926		m	E	6	6 <= CBD < 7	Succession Class D	0	No Disturbance	NA	Upland Forest	10280	Mediterranean California Mesic Mixed Conifer Forest and Woodland	117	Douglas Fir-White Fir-Sugar Pine-1	Conifer	104	Tree Cover >= 40 and < 50%	7	Cascade Mountain Range	1000	Mediterranean California Mesic Mixed Conifer Forest and Woodland	5	Conifer	Ponderosa Pine Forest, Woodland and Savanna	SAF 237: Interior Ponderosa Pine	Tree-dominated	Open tree canopy	250 <= CH < 500	Tr Northern Rocky Mountain Ponderosa Pine Woodland and Savanna	Tree	Evergreen open tree canopy	40 <= CC < 50	No	Conifer
KBOFUELRKLAMATHNF GND_11	9766.59	199.235	1910.72	12.7379	11.4871	639.29	27.97	12.035	35	175	65	2	1638	0.737886		m	Flat	6	6 <= CBD < 7	Succession Class C	112	Fire	Low	Upland Forest	10280	Mediterranean California Mesic Mixed Conifer Forest and Woodland	117	Douglas Fir-White Fir-Sugar Pine-1	Conifer	103	Tree Cover >= 30 and < 40%	7	Cascade Mountain Range	1000	Mediterranean California Mesic Mixed Conifer Forest and Woodland	5	Conifer	Ponderosa Pine Forest, Woodland and Savanna	SAF 237: Interior Ponderosa Pine	Tree-dominated	Open tree canopy	100 <= CH < 250	Tr Northern Rocky Mountain Ponderosa Pine Woodland and Savanna	Tree	Evergreen open tree canopy	30 <= CC < 40	No	Conifer
KBOFUELRKLAMATHNF GND_21	13175.7	196.642	1824.97	10.8112	10.7122	431.36	28.65	12.7225	25	175	42	1	1459	0.740061		z	NE	4	4 <= CBD < 5	Succession Class C	0	No Disturbance	NA	Upland Woodland	10310	California Montane Jeffrey Pine(-Ponderosa Pine) Woodland	120	Jeffrey Pine-1	Conifer	102	Tree Cover >= 20 and < 30%	7	Cascade Mountain Range	1100	Northern Rocky Mountain Ponderosa Pine Woodland and Savanna	4	Conifer	Ponderosa Pine Forest, Woodland and Savanna	SAF 237: Interior Ponderosa Pine	Tree-dominated	Open tree canopy	100 <= CH < 250	Tr Northern Rocky Mountain Ponderosa Pine Woodland and Savanna	Tree	Evergreen open tree canopy	20 <= CC < 30	No	Mixed
KBOFUELRKLAMATHNF GND_26	12749	194.293	88.766	9.03483	9.02359	430.39	28.71	12.73	35	175	37	0	1457	0.7556		n	Flat	6	6 <= CBD < 7	Succession Class B	0	No Disturbance	NA	Upland Woodland	10310	California Montane Jeffrey Pine(-Ponderosa Pine) Woodland	120	Jeffrey Pine-1	Conifer	103	Tree Cover >= 30 and < 40%	7	Cascade Mountain Range	1100	Northern Rocky Mountain Ponderosa Pine Woodland and Savanna	4	Conifer	Ponderosa Pine Forest, Woodland and Savanna	SAF 237: Interior Ponderosa Pine	Tree-dominated	Open tree canopy	100 <= CH < 250	Tr Northern Rocky Mountain Ponderosa Pine Woodland and Savanna	Tree	Evergreen open tree canopy	30 <= CC < 40	No	Conifer
KBOFUELRKLAMATHNF GNE_06	6795.11	187.875	3661.27	5.17759	0.50518	984.36	28.72	10.0525	65	375	60	14	1852	0.66379		m	N	12	12 <= CBD < 13	Succession Class E	0	No Disturbance	NA	Upland Forest	10280	Mediterranean California Mesic Mixed Conifer Forest and Woodland	117	Douglas Fir-White Fir-Sugar Pine-1	Conifer	106	Tree Cover >= 60 and < 70%	7	Cascade Mountain Range	1000	Mediterranean California Mesic Mixed Conifer Forest and Woodland	5	Conifer	Douglas-fir-Grand Fir-White Fir Forest and Woodland	SAF 211: White Fir	Tree-dominated	Closed tree canopy	250 <= CH < 500	Tr Mediterranean California Mesic Mixed Conifer Forest and Woodland	Tree	Evergreen closed tree canopy	60 <= CC < 70	No	Conifer
KBOFUELRKLAMATHNF GNE_12	8901.36	189.096	3413.91	6.97498	0.49392	1148.55	28.64	10.3825	45	375	86	7	1846	0.826215		m	S	6	6 <= CBD < 7	Succession Class D	0	No Disturbance	NA	Upland Forest	10280	Mediterranean California Mesic Mixed Conifer Forest and Woodland	117	Douglas Fir-White Fir-Sugar Pine-1	Conifer	104	Tree Cover >= 40 and < 50%	7	Cascade Mountain Range	1000	Mediterranean California Mesic Mixed Conifer Forest and Woodland	5	Conifer	Douglas-fir-Grand Fir-White Fir Forest and Woodland	SAF 211: White Fir	Tree-dominated	Closed tree canopy	250 <= CH < 500	Tr Mediterranean California Mesic Mixed Conifer Forest and Woodland	Tree	Evergreen closed tree canopy	40 <= CC < 50	No	Conifer
KBOFUELRKLAMATHNF GNE_30	10029.6	191.166	756.373	5.48631	3.09375	629.22	27.94	12.455	35	175	59	4	1613	0.711379		m	N	1	1 <= CBD < 2	Succession Class D	312	Mechanical Remove	Low	Upland Forest	10110	Rocky Mountain Aspen Forest and Woodland	102	Quaking Aspen-4	Hardwood	103	Tree Cover >= 30 and < 40%	7	Cascade Mountain Range	1000	Rocky Mountain Aspen Forest and Woodland	5	Hardwood	Aspen Forest, Woodland, and Parkland	SAF 217: Aspen	Tree-dominated	Open tree canopy	100 <= CH < 250	Tr Rocky Mountain Aspen Forest and Woodland	Tree	Deciduous open tree canopy	30 <= CC < 40	No	Conifer
KBOFUELRKLAMATHNF HCA_03	92.851	58.5187	2430.4	2.90489	0.142939	1716.2	30.13	16.1	75	375	74	10	710	0.77204		r	SE	16	16 <= CBD < 17	Succession Class C	0	No Disturbance	NA	Upland Forest	10430	Mediterranean California Mixed Evergreen Forest	133	Douglas Fir-Tanoak-Pacific Madrone-1	Conifer	107	Tree Cover >= 70 and < 80%	3	Northern California Coastal Range	1000	Mediterranean California Mixed Evergreen Forest	5	Conifer	California Mixed Evergreen Forest and Woodland	SAF 234: Douglas-Fir-Tanoak-Pacific Madrone	Tree-dominated	Closed tree canopy	250 <= CH < 500	Tr Mediterranean California Mixed Evergreen Forest	Tree	Evergreen closed tree canopy	70 <= CC < 80	No	Conifer
KBOFUELRKLAMATHNF HCA_14	105.341	59.9622	2450.61	3.92186	-0.004612	1778.25	29.65	15.7975	45	175	72	31	767	1.02762		r	W	8	8 <= CBD < 9	Succession Class B	0	No Disturbance	NA	Upland Forest	10430	Mediterranean California Mixed Evergreen Forest	133	Douglas Fir-Tanoak-Pacific Madrone-1	Conifer	104	Tree Cover >= 40 and < 50%	3	Northern California Coastal Range	1000	Mediterranean California Mixed Evergreen Forest	5	Conifer	California Mixed Evergreen Forest and Woodland	SAF 234: Douglas-Fir-Tanoak-Pacific Madrone	Tree-dominated	Closed tree canopy	100 <= CH < 250	Tr Mediterranean California Mixed Evergreen Forest	Tree	Evergreen closed tree canopy	40 <= CC < 50	No	Conifer
KBOFUELRKLAMATHNF HCA_21	463.774	61.306	3268.07	3.33257	0.155809	1553.31	30.52	16.495	75	175	85	34	560	0.396687		z	N	22	22 <= CBD < 23	Succession Class B	132	Fire	High	Upland Forest	10430	Mediterranean California Mixed Evergreen Forest	133	Douglas Fir-Tanoak-Pacific Madrone-1	Conifer	107	Tree Cover >= 70 and < 80%	3	Northern California Coastal Range	1000	Mediterranean California Mixed Evergreen Forest	5	Conifer	California Mixed Evergreen Forest and Woodland	SAF 234: Douglas-Fir-Tanoak-Pacific Madrone	Tree-dominated	Closed tree canopy	100 <= CH < 250	Tr Mediterranean California Mixed Evergreen Forest	Tree	Evergreen closed tree canopy	70 <= CC < 80	No	Mixed
KBOFUELRKLAMATHNF HCA_27	743.337	62.9347	2889.19	2.69616	0.033789	1378.61	30.53	16.6075	45	375	80	31	677	0.356452		r	NE	6	6 <= CBD < 7	Burnable Urban	112	Fire	Low	Undetermined	10430	Mediterranean California Mixed Evergreen Forest	133	Douglas Fir-Tanoak-Pacific Madrone-1	Conifer	14	Developed-Upland Evergreen Forest	3	Northern California Coastal Range	1000	Mediterranean California Mixed Evergreen Forest	0	Developed	Developed-Upland Evergreen Forest	LF 20: Developed	Tree-dominated	Open tree canopy	250 <= CH < 500	Dtc Urban Evergreen Forest	Tree	Evergreen open tree canopy	40 <= CC < 50	No	Conifer
KBOFUELRKLAMATHNF HCB_15	627.237	63.6955	1791.86	9.47758	0.079995	1676.71	24.4	10.425	45	175	73	25	1727	1.02263		m	SW	8	8 <= CBD < 9	Succession Class B	0	No Disturbance	NA	Upland Forest	10320	Mediterranean California Red Fir Forest	121	Red Fir-1	Conifer	104	Tree Cover >= 40 and < 50%	2	Oregon Coastal Range	1000	Mediterranean California Red Fir Forest	5	Conifer	Douglas-fir-Grand Fir-White Fir Forest and Woodland	SAF 211: White Fir	Tree-dominated	Closed tree canopy	100 <= CH < 250	Tr Mediterranean California Mesic Mixed Conifer Forest and Woodland	Tree	Evergreen closed tree canopy	40 <= CC < 50	No	Conifer
KBOFUELRKLAMATHNF HCB_23	723.182	66.1193	3086.13	13.0445	1.30137	1643.72	24.84	10.755	65	375	90	34	1661	1.07063		m	W	12	12 <= CBD < 13	Succession Class E	0	No Disturbance	NA	Upland Forest	10280	Mediterranean California Mesic Mixed Conifer Forest and Woodland	117	Douglas Fir-White Fir-Sugar Pine-1	Conifer	106	Tree Cover >= 60 and < 70%	3	Northern California Coastal Range	1000	Mediterranean California Red Fir Forest	5	Conifer	Douglas-fir-Grand Fir-White Fir Forest and Woodland	SAF 211: White Fir	Tree-dominated	Closed tree canopy	250 <= CH < 500	Tr Mediterranean California Mesic Mixed Conifer Forest and Woodland	Tree	Evergreen closed tree canopy	60 <= CC < 70	No	Conifer
KBOFUELRKLAMATHNF HCB_28	951.574	67.0704	5710.47	11.6011	0.054998	1450.06	27.04	13.1475	55	375	94	20	1541	0.630712		m	E	9	9 <= CBD < 10	Succession Class E	0	No Disturbance	NA	Upland Forest	10320	Mediterranean California Red Fir Forest	121	Red Fir-1	Conifer	105	Tree Cover >= 50 and < 60%	3	Northern California Coastal Range	1000	Mediterranean California Red Fir Forest	5	Conifer	Red Fir Forest and Woodland	SAF 207: Red Fir	Tree-dominated	Open tree canopy	250 <= CH < 500	Tr Mediterranean California Red Fir Forest	Tree	Evergreen open tree canopy	50 <= CC < 60	No	Conifer
KBOFUELRKLAMATHNF HCC_07	21.156	53.5543	6071.54	1.69546	0.105751	1614.84	30.69	15.8875	75	175	93	11	661	0.702493		q	E	22	22 <= CBD < 23	Succession Class B	0	No Disturbance	NA	Upland Forest	10430	Mediterranean California Mixed Evergreen Forest	133	Douglas Fir-Tanoak-Pacific Madrone-1	Conifer	107	Tree Cover >= 70 and < 80%	3	Northern California Coastal Range	1000	Mediterranean California Mixed Evergreen Forest	5	Conifer	California Mixed Evergreen Forest and Woodland	SAF 234: Douglas-Fir-Tanoak-Pacific Madrone	Tree-dominated	Closed tree canopy	100 <= CH < 250	Tr Mediterranean California Mixed Evergreen Forest	Tree	Evergreen closed tree canopy	70 <= CC < 80	No	Conifer
KBOFUELRKLAMATHNF HCC_17	606.884	47.9091	217.498	5.07922	0.238855	2239.25	27.51	14.4375	55	375	77	17	1309	0.828493		r	SE	9	9 <= CBD < 10	Succession Class E	113	Fire	Low	Upland Forest	10220	Klamath-Siskiyou Upper Montane Serpentine Mixed Conifer Woodland	112	Douglas Fir-Incense Cedar-1	Conifer	105	Tree Cover >= 50 and < 60%	3	Northern California Coastal Range	1000	Klamath-Siskiyou Upper Montane Serpentine Mixed Conifer Woodland	5	Conifer	Western Red-cedar-Western Hemlock Forest	SAF 248: Knobcone Pine	Tree-dominated	Open tree canopy	250 <= CH < 500	Tr Klamath-Siskiyou Upper Montane Serpentine Mixed Conifer Woodland	Tree	Evergreen open tree canopy	50 <= CC < 60	No	Conifer
KBOFUELRKLAMATHNF HCC_25	430.373	45.2428	1430.1	9.26267	0.142876	3187.66	26.4	12.765	45	375	69	15	1415	0.901236		i	SW	6	6 <= CBD < 7	Succession Class D	122	Fire	Moderate	Upland Forest	10220	Klamath-Siskiyou Upper Montane Serpentine Mixed Conifer Woodland	112	Douglas Fir-Incense Cedar-1	Conifer	104	Tree Cover >= 40 and < 50%	3	Northern California Coastal Range	1000	Klamath-Siskiyou Upper Montane Serpentine Mixed Conifer Woodland	5	Conifer	Western Red-cedar-Western Hemlock Forest	SAF 248: Knobcone Pine	Tree-dominated	Open tree canopy	250 <= CH < 500	Tr Klamath-Siskiyou Upper Montane Serpentine Mixed Conifer Woodland	Tree	Evergreen open tree canopy	40 <= CC < 50	No	Conifer
KBOFUELRKLAMATHNF HRS1_08	193.666	93.4782	2731.24	2.61276	0.022557	579.31	30.17	16.2725	0	0	74	3	522	0.802781		y	SW	0	Non-Forested	Succession Class A	0	No Disturbance	NA	Upland Shrub	10270	Mediterranean California Dry-Mesic Mixed Conifer Forest and Woodland	116	Ponderosa Pine-Incense Cedar-1	Conifer	122	Herb Cover >= 20 and < 30%	3	Northern California Coastal Range	1000	Mediterranean California Dry-Mesic Mixed Conifer Forest and Woodland	3	Grassland	Grassland	SRM 102: Idaho Fescue	Herbaceous / Nonvascular-dominated	Herbaceous - grassland	Non-Forested	He North Pacific Montane Grassland	Herb	Perennial graminoid grassland	Non-Forested	No	Conifer
KBOFUELRKLAMATHNF HRS1_18	174.471	90.1203	3627.14	5.55851	0.121593	710.47	30.11	15.98	0	0	85	25	689	1.00286		p	SW	0	Non-Forested	Succession Class D	0	No Disturbance	NA	Upland Shrub	10270	Mediterranean California Dry-Mesic Mixed Conifer Forest and Woodland	116	Ponderosa Pine-Incense Cedar-1	Conifer	111	Shrub Cover >= 10 and < 20%	3	Northern California Coastal Range	1000	Mediterranean California Dry-Mesic Mixed Conifer Forest and Woodland	3	Shrubland	Chaparral	SRM 209: Montane Shrubland	Shrub-dominated	Shrubland	Non-Forested	Sh California Montane Woodland and Chaparral	Shrub	Evergreen shrubland	Non-Forested	No	Mixed
KBOFUELRKLAMATHNF HRS1_25	40.902	89.2853	3143.62	6.04334	0.129779	746.57	29.68	16	75	375	90	25	651	0.706323		e	SE	16	16 <= CBD < 17	Succession Class E	0	No Disturbance	NA	Upland Forest	10270	Mediterranean California Dry-Mesic Mixed Conifer Forest and Woodland	116	Ponderosa Pine-Incense Cedar-1	Conifer	107	Tree Cover >= 70 and < 80%	3	Northern California Coastal Range	1000	Mediterranean California Dry-Mesic Mixed Conifer Forest and Woodland	5	Conifer	Douglas-fir-Ponderosa Pine-Lodgepole Pine Forest and Woodland	SAF 243: Sierra Nevada Mixed Conifer	Tree-dominated	Open tree canopy	250 <= CH < 500	Tr Mediterranean California Dry-Mesic Mixed Conifer Forest and Woodland	Tree	Evergreen open tree canopy	70 <= CC < 80	No	Mixed
KBOFUELRKLAMATHNF HUNA_05	48.371	119.981	988.345	10.9533	0.007838	715.59	27.74	13.4725	45	375	86	19	1117	0.653145		r	E	6	6 <= CBD < 7	Succession Class D	0	No Disturbance	NA	Upland Woodland	10270	Mediterranean California Dry-Mesic Mixed Conifer Forest and Woodland	116	Ponderosa Pine-Incense Cedar-1	Conifer	104	Tree Cover >= 40 and < 50%	3	Northern California Coastal Range	1000	Mediterranean California Dry-Mesic Mixed Conifer Forest and Woodland	4	Conifer	Douglas-fir-Ponderosa Pine-Lodgepole Pine Forest and Woodland	SAF 243: Sierra Nevada Mixed Conifer	Tree-dominated	Open tree canopy	250 <= CH < 500	Tr Mediterranean California Dry-Mesic Mixed Conifer Forest and Woodland	Tree	Evergreen open tree canopy	40 <= CC < 50	No	Conifer
KBOFUELRKLAMATHNF HUNA_13	26.756	120.591	932.276	10.3392	0.0435	715.59	27.74	13.4725	65	375	77	8	1177	0.823398		m	NW	12	12 <= CBD < 13	Succession Class E	0	No Disturbance	NA	Upland Forest	10280	Mediterranean California Mesic Mixed Conifer Forest and Woodland	117	Douglas Fir-White Fir-Sugar Pine-1	Conifer	106	Tree Cover >= 60 and < 70%	3	Northern California Coastal Range	1000	Mediterranean California Mesic Mixed Conifer Forest and Woodland	5	Conifer	Douglas-fir-Grand Fir-White Fir Forest and Woodland	SAF 211: White Fir	Tree-dominated	Closed tree canopy	250 <= CH < 500	Tr Mediterranean California Mesic Mixed Conifer Forest and Woodland	Tree	Evergreen closed tree canopy	60 <= CC < 70	No	Conifer
KBOFUELRKLAMATHNF HUNB_03	344.984	122.805	2360.99	8.60686	0.054804	718.86	26.28	12.2975	45	175	81	11	1398	0.809448		m	NW	8	8 <= CBD < 9	Succession Class C	0	No Disturbance	NA	Upland Forest	10280	Mediterranean California Mesic Mixed Conifer Forest and Woodland	117	Douglas Fir-White Fir-Sugar Pine-1	Conifer	104	Tree Cover >= 40 and < 50%	2	Oregon Coastal Range	1000	Mediterranean California Mesic Mixed Conifer Forest and Woodland	5	Conifer	Douglas-fir-Grand Fir-White Fir Forest and Woodland	SAF 211: White Fir	Tree-dominated	Closed tree canopy	100 <= CH < 250	Tr Mediterranean California Mesic Mixed Conifer Forest and Woodland	Tree	Evergreen closed tree canopy	40 <= CC < 50	No	Conifer
KBOFUELRKLAMATHNF HUNB_13	90.605	120.729	1510.2	10.4341	0.198006	735.17	27.43	13.0025	75	375	82	15	1248	0.724946		m	E	16	16 <= CBD < 17	Succession Class E	0	No Disturbance	NA	Upland Forest	10270	Mediterranean California Dry-Mesic Mixed Conifer Forest and Woodland	116	Ponderosa Pine-Incense Cedar-1	Conifer	107	Tree Cover >= 70 and < 80%	3	Northern California Coastal Range	1000	Mediterranean California Mesic Mixed Conifer Forest and Woodland	5	Conifer	Douglas-fir-Ponderosa Pine-Lodgepole Pine Forest and Woodland	SAF 243: Sierra Nevada Mixed Conifer	Tree-dominated	Open tree canopy	250 <= CH < 500	Tr Mediterranean California Dry-Mesic Mixed Conifer Forest and Woodland	Tree	Evergreen open tree canopy	70 <= CC < 80	No	Conifer
KBOFUELRKLAMATHNF INSC_03	427.502	83.5244	701.846	0.366197	0.375678	596.36	29.81	15.7475	35	175	81	12	890	0.82832		r	SE	6	6 <= CBD < 7	Succession Class C	113	Fire	Low	Upland Forest	10270	Mediterranean California Dry-Mesic Mixed Conifer Forest and Woodland	116	Ponderosa Pine-Incense Cedar-1	Conifer	103	Tree Cover >= 30 and < 40%	3	Northern California Coastal Range	1000	Mediterranean California Dry-Mesic Mixed Conifer Forest and Woodland	5	Conifer	Douglas-fir-Ponderosa Pine-Lodgepole Pine Forest and Woodland	SAF 243: Sierra Nevada Mixed Conifer	Tree-dominated	Open tree canopy	100 <= CH < 250	Tr Mediterranean California Dry-Mesic Mixed Conifer Forest and Woodland	Tree	Evergreen open tree canopy	30 <= CC < 40	No	Conifer
KBOFUELRKLAMATHNF INSC_09	619.245	81.8063	973.183	0.305941	0.293668	547.11	31.39	15.8825	55	375	72	30	875	0.979848		m	SW	9	9 <= CBD < 10	Succession Class D	0	No Disturbance	NA	Upland Forest	10270	Mediterranean California Dry-Mesic Mixed Conifer Forest and Woodland	116	Ponderosa Pine-Incense Cedar-1	Conifer	105	Tree Cover >= 50 and < 60%	3	Northern California Coastal Range	1000	Mediterranean California Dry-Mesic Mixed Conifer Forest and Woodland	5	Conifer	Douglas-fir-Ponderosa Pine-Lodgepole Pine Forest and Woodland	SAF 243: Sierra Nevada Mixed Conifer	Tree-dominated	Open tree canopy	250 <= CH < 500	Tr Mediterranean California Dry-Mesic Mixed Conifer Forest and Woodland	Tree	Evergreen open tree canopy	50 <= CC < 60	No	Conifer
KBOFUELRKLAMATHNF LBLD_01	872.255	95.8869	2495.67	3.62417	0.09451	819.01	27.51	14.8525	75	375	82	26	1279	0.834936		r	NW	16	16 <= CBD < 17	Succession Class E	0	No Disturbance	NA	Upland Forest	10280	Mediterranean California Mesic Mixed Conifer Forest and Woodland	117	Douglas Fir-White Fir-Sugar Pine-1	Conifer	107	Tree Cover >= 70 and < 80%	3	Northern California Coastal Range	1000	Mediterranean California Mesic Mixed Conifer Forest and Woodland	5	Conifer	Douglas-fir-Grand Fir-White Fir Forest and Woodland	SAF 211: White Fir	Tree-dominated	Closed tree canopy	250 <= CH < 500	Tr Mediterranean California Mesic Mixed Conifer Forest and Woodland	Tree	Evergreen closed tree canopy	70 <= CC < 80	No	Conifer
KBOFUELRKLAMATHNF LBLD_14	297.968	92.8078	975.542	1.54638	1.05821	576.04	29.13	15.9925	45	175	84	18	996	0.926061		r	SW	1	1 <= CBD < 2	Succession Class C	0	No Disturbance	NA	Upland Forest	10270	Mediterranean California Dry-Mesic Mixed Conifer Forest and Woodland	116	Ponderosa Pine-Incense Cedar-1	Conifer	104	Tree Cover >= 40 and < 50%	3	Northern California Coastal Range	1000	Mediterranean California Dry-Mesic Mixed Conifer Forest and Woodland	5	Conifer	Conifer-Oak Forest and Woodland	SAF 246: California Black Oak	Tree-dominated	Open tree canopy	100 <= CH < 250	Tr Mediterranean California Lower Montane Conifer Forest and Woodland	Tree	Evergreen open tree canopy	40 <= CC < 50	No	Conifer
KBOFUELRKLAMATHNF LBLD_18	219.315	93.0786	1731.84	1.44997	1.44058	604.5	28.81	15.6375	0	0	82	22	888	0.907334		r	SE	0	Non-Forested	Succession Class A	0	No Disturbance	NA	Upland Forest	10270	Mediterranean California Dry-Mesic Mixed Conifer Forest and Woodland	116	Ponderosa Pine-Incense Cedar-1	Conifer	103	Tree Cover >= 30 and < 40%	3	Northern California Coastal Range	1000	Mediterranean California Dry-Mesic Mixed Conifer Forest and Woodland	5	Conifer	Douglas-fir-Ponderosa Pine-Lodgepole Pine Forest and Woodland	SAF 243: Sierra Nevada Mixed Conifer	Tree-dominated	Open tree canopy	Non-Forested	Tr Mediterranean California Dry-Mesic Mixed Conifer Forest and Woodland	Tree	Evergreen open tree canopy	Non-Forested	No	Conifer
KBOFUELRKLAMATHNF LED1_10	41.18	117.29	1285.74	1.57892	0.046105	579.32	29.89	15.765	0	0	52	31	716	1.04059		z	SW	0	Non-Forested	Succession Class A	0	No Disturbance	NA	Upland Shrub	11050	Northern and Central California Dry-Mesic Chaparral	208	Chamise-Manzanita-4	Shrubland	112	Shrub Cover >= 20 and < 30%	3	Northern California Coastal Range	1000	Mediterranean California Dry-Mesic Mixed Conifer Forest and Woodland	3	Shrubland	Chaparral	SRM 206: Chamise Chaparral	Shrub-dominated	Shrubland	Non-Forested	Sh Northern and Central California Dry-Mesic Chaparral	Shrub	Evergreen shrubland	Non-Forested	No	Mixed
KBOFUELRKLAMATHNF LED1_12	130.581	117.185	1825.04	0.853815	0.077624	563.31	30.41	15.77	0	0	55	19	654	0.697179		o	E	0	Non-Forested	Succession Class A	0	No Disturbance	NA	Upland Shrub	10990	California Xeric Serpentine Chaparral	200	Chamise-Scrub Oak-4	Shrubland	111	Shrub Cover >= 10 and < 20%	3	Northern California Coastal Range	1100	California Xeric Serpentine Chaparral	3	Shrubland	Chaparral	SRM 209: Montane Shrubland	Shrub-dominated	Shrubland	Non-Forested	Sh California Xeric Serpentine Chaparral	Shrub	Evergreen shrubland	Non-Forested	No	Mixed
KBOFUELRKLAMATHNF LHM1_05	318.447	109.732	2517.68	2.59825	-0.0051	636.94	29.86	16.0425	0	0	63	8	792	0.859232		f	SW	0	Non-Forested	Succession Class D	0	No Disturbance	NA	Upland Shrub	10270	Mediterranean California Dry-Mesic Mixed Conifer Forest and Woodland	116	Ponderosa Pine-Incense Cedar-1	Conifer	111	Shrub Cover >= 10 and < 20%	3	Northern California Coastal Range	1000	Mediterranean California Dry-Mesic Mixed Conifer Forest and Woodland	3	Shrubland	Chaparral	SRM 209: Montane Shrubland	Shrub-dominated	Shrubland	Non-Forested	Sh California Montane Woodland and Chaparral	Shrub	Evergreen shrubland	Non-Forested	No	Mixed
KBOFUELRKLAMATHNF LHM1_15	331.732	112.156	4080.69	3.83648	-0.003307	738.67	28.86	14.875	0	0	75	24	1046	0.674588		e	N	0	Non-Forested	Succession Class A	0	No Disturbance	NA	Upland Forest	10270	Mediterranean California Dry-Mesic Mixed Conifer Forest and Woodland	116	Ponderosa Pine-Incense Cedar-1	Conifer	103	Tree Cover >= 30 and < 40%	3	Northern California Coastal Range	1000	Mediterranean California Dry-Mesic Mixed Conifer Forest and Woodland	5	Conifer	Douglas-fir-Ponderosa Pine-Lodgepole Pine Forest and Woodland	SAF 243: Sierra Nevada Mixed Conifer	Tree-dominated	Open tree canopy	Non-Forested	Tr Mediterranean California Dry-Mesic Mixed Conifer Forest and Woodland	Tree	Evergreen open tree canopy	Non-Forested	No	Mixed
KBOFUELRKLAMATHNF LICK_11	32.777	93.1418	2675.74	1.26	1.24648	568.74	30.41	16.205	75	375	75	14	599	0.932781		r	S	16	16 <= CBD < 17	Succession Class E	0	No Disturbance	NA	Upland Forest	10270	Mediterranean California Dry-Mesic Mixed Conifer Forest and Woodland	116	Ponderosa Pine-Incense Cedar-1	Conifer	107	Tree Cover >= 70 and < 80%	3	Northern California Coastal Range	1000	Mediterranean California Dry-Mesic Mixed Conifer Forest and Woodland	5	Conifer	Douglas-fir-Ponderosa Pine-Lodgepole Pine Forest and Woodland	SAF 243: Sierra Nevada Mixed Conifer	Tree-dominated	Open tree canopy	250 <= CH < 500	Tr Mediterranean California Dry-Mesic Mixed Conifer Forest and Woodland	Tree	Evergreen open tree canopy	70 <= CC < 80	No	Conifer
KBOFUELRKLAMATHNF MCGU_10	1313.16	88.8827	337.369	2.64698	2.10347	778.22	25.88	12.93	45	375	62	31	1679	0.382703		m	NE	6	6 <= CBD < 7	Succession Class D	0	No Disturbance	NA	Upland Forest	10280	Mediterranean California Mesic Mixed Conifer Forest and Woodland	117	Douglas Fir-White Fir-Sugar Pine-1	Conifer	104	Tree Cover >= 40 and < 50%	3	Northern California Coastal Range	1000	Mediterranean California Mesic Mixed Conifer Forest and Woodland	5	Conifer	Douglas-fir-Grand Fir-White Fir Forest and Woodland	SAF 211: White Fir	Tree-dominated	Closed tree canopy	250 <= CH < 500	Tr Mediterranean California Mesic Mixed Conifer Forest and Woodland	Tree	Evergreen closed tree canopy	40 <= CC < 50	No	Conifer
KBOFUELRKLAMATHNF MCGU_17	1068.77	87.9489	1226.74	3.07847	2.3791	857.84	23.81	11.235	0	0	45	20	1744	0.851025		r	SE	0	Non-Forested	Uncharacteristic Exotic Vegetation	113	Fire	Low	Upland Forest	10280	Mediterranean California Mesic Mixed Conifer Forest and Woodland	117	Douglas Fir-White Fir-Sugar Pine-1	Conifer	125	Herb Cover >= 50 and < 60%	3	Northern California Coastal Range	1000	Mediterranean California Mesic Mixed Conifer Forest and Woodland	5	Exotic Herbaceous	Introduced Perennial Grassland and Forbland	LF 54: Introduced Upland Vegetation - Herbaceous	Herbaceous / Nonvascular-dominated	Herbaceous - grassland	Non-Forested	He Introduced Upland Vegetation-Perennial Grassland and Forbland	Herb	Perennial graminoid grassland	Non-Forested	No	Conifer
KBOFUELRKLAMATHNF MIL1_13	207.09	96.4094	5107	4.14152	0.0765	590.81	30.08	16.3425	55	175	75	18	716	0.970778		r	S	1	1 <= CBD < 2	Succession Class C	0	No Disturbance	NA	Upland Forest	10270	Mediterranean California Dry-Mesic Mixed Conifer Forest and Woodland	116	Ponderosa Pine-Incense Cedar-1	Conifer	105	Tree Cover >= 50 and < 60%	3	Northern California Coastal Range	1000	Mediterranean California Dry-Mesic Mixed Conifer Forest and Woodland	5	Hardwood	Western Oak Woodland and Savanna	SAF 233: Oregon White Oak	Tree-dominated	Open tree canopy	100 <= CH < 250	Tr Quercus garryana Woodland Alliance	Tree	Deciduous open tree canopy	50 <= CC < 60	No	Conifer
KBOFUELRKLAMATHNF MIL1_18	214.788	97.7865	5631.89	5.49819	0.20415	598.61	30.36	16.3025	0	0	75	29	849	0.96186		p	S	0	Non-Forested	Succession Class D	0	No Disturbance	NA	Upland Shrub	10270	Mediterranean California Dry-Mesic Mixed Conifer Forest and Woodland	116	Ponderosa Pine-Incense Cedar-1	Conifer	111	Shrub Cover >= 10 and < 20%	3	Northern California Coastal Range	1000	Mediterranean California Dry-Mesic Mixed Conifer Forest and Woodland	3	Shrubland	Chaparral	SRM 209: Montane Shrubland	Shrub-dominated	Shrubland	Non-Forested	Sh California Montane Woodland and Chaparral	Shrub	Evergreen shrubland	Non-Forested	No	Mixed
KBOFUELRKLAMATHNF MTA1_01	398.194	109.196	778.453	16.2167	0.105924	1528.77	21.82	7.8875	0	0	59	16	2064	0.943566		m	SW	0	Non-Forested	Succession Class A	0	No Disturbance	NA	Upland Herb	10320	Mediterranean California Red Fir Forest	121	Red Fir-1	Conifer	126	Herb Cover >= 60 and < 70%	3	Northern California Coastal Range	1000	Mediterranean California Red Fir Forest	2	Grassland	Grassland	SRM 102: Idaho Fescue	Herbaceous / Nonvascular-dominated	Herbaceous - grassland	Non-Forested	He North Pacific Montane Grassland	Herb	Perennial graminoid grassland	Non-Forested	No	Conifer
KBOFUELRKLAMATHNF MTA1_12	55.967	114.558	1007.77	14.3163	0.208776	1198.63	23.37	9.93	0	0	64	7	1786	0.724515		m	E	0	Non-Forested	Water	0	No Disturbance	NA	Upland Woodland	11	Open Water	11	Open Water	Open Water	11	Open Water	3	Northern California Coastal Range	11	Open Water	4	Open Water	Open Water	Non-vegetated	Non-vegetated	Non-vegetated	Non-Forested	Ba Open Water	Water	Non-vegetated	Non-Forested	No	Conifer
KBOFUELRKLAMATHNF MYGU_01	1084.62	110.689	5353.23	7.02102	0.137906	695.27	27.75	14.4375	45	375	80	19	1081	0.67306		r	E	6	6 <= CBD < 7	Succession Class D	0	No Disturbance	NA	Upland Forest	10270	Mediterranean California Dry-Mesic Mixed Conifer Forest and Woodland	116	Ponderosa Pine-Incense Cedar-1	Conifer	104	Tree Cover >= 40 and < 50%	3	Northern California Coastal Range	1000	Mediterranean California Dry-Mesic Mixed Conifer Forest and Woodland	5	Conifer	Douglas-fir-Ponderosa Pine-Lodgepole Pine Forest and Woodland	SAF 243: Sierra Nevada Mixed Conifer	Tree-dominated	Open tree canopy	250 <= CH < 500	Tr Mediterranean California Dry-Mesic Mixed Conifer Forest and Woodland	Tree	Evergreen open tree canopy	40 <= CC < 50	No	Conifer
KBOFUELRKLAMATHNF MYGU_08	1088.06	109.695	4223.61	7.64547	0.097783	767.17	25.67	13.325	55	375	88	21	1290	0.662493		m	E	9	9 <= CBD < 10	Succession Class D	0	No Disturbance	NA	Upland Forest	10270	Mediterranean California Dry-Mesic Mixed Conifer Forest and Woodland	116	Ponderosa Pine-Incense Cedar-1	Conifer	105	Tree Cover >= 50 and < 60%	3	Northern California Coastal Range	1000	Mediterranean California Mesic Mixed Conifer Forest and Woodland	5	Conifer	Douglas-fir-Ponderosa Pine-Lodgepole Pine Forest and Woodland	SAF 243: Sierra Nevada Mixed Conifer	Tree-dominated	Open tree canopy	250 <= CH < 500	Tr Mediterranean California Dry-Mesic Mixed Conifer Forest and Woodland	Tree	Evergreen open tree canopy	50 <= CC < 60	No	Conifer
KBOFUELRKLAMATHNF NOLG_18	122.387	100.631	1124.77	0.429535	0.088024	1524.03	26.57	12.03	35	175	60	20	1612	0.930428		m	W	6	6 <= CBD < 7	Succession Class C	113	Fire	Low	Upland Woodland	10280	Mediterranean California Mesic Mixed Conifer Forest and Woodland	117	Douglas Fir-White Fir-Sugar Pine-1	Conifer	103	Tree Cover >= 30 and < 40%	3	Northern California Coastal Range	1000	Mediterranean California Mesic Mixed Conifer Forest and Woodland	4	Conifer	Douglas-fir-Grand Fir-White Fir Forest and Woodland	SAF 211: White Fir	Tree-dominated	Closed tree canopy	100 <= CH < 250	Tr Mediterranean California Mesic Mixed Conifer Forest and Woodland	Tree	Evergreen closed tree canopy	30 <= CC < 40	No	Conifer
KBOFUELRKLAMATHNF OKA_29	88.707	117.381	4285.36	14.4511	0.155871	1076.82	24.86	11.22	45	375	78	19	1481	0.95647		m	SW	6	6 <= CBD < 7	Succession Class D	0	No Disturbance	NA	Upland Forest	10280	Mediterranean California Mesic Mixed Conifer Forest and Woodland	117	Douglas Fir-White Fir-Sugar Pine-1	Conifer	104	Tree Cover >= 40 and < 50%	2	Oregon Coastal Range	1000	Mediterranean California Mesic Mixed Conifer Forest and Woodland	5	Conifer	Douglas-fir-Ponderosa Pine-Lodgepole Pine Forest and Woodland	SAF 243: Sierra Nevada Mixed Conifer	Tree-dominated	Open tree canopy	250 <= CH < 500	Tr Mediterranean California Dry-Mesic Mixed Conifer Forest and Woodland	Tree	Evergreen open tree canopy	40 <= CC < 50	No	Conifer
KBOFUELRKLAMATHNF OKB_03	315.785	79.0451	4465.03	4.12148	0.055021	1469.2	27.61	15.1375	65	375	93	17	1172	0.800701		m	NW	12	12 <= CBD < 13	Succession Class E	0	No Disturbance	NA	Upland Forest	10280	Mediterranean California Mesic Mixed Conifer Forest and Woodland	117	Douglas Fir-White Fir-Sugar Pine-1	Conifer	106	Tree Cover >= 60 and < 70%	3	Northern California Coastal Range	1000	Mediterranean California Mesic Mixed Conifer Forest and Woodland	5	Conifer	Douglas-fir-Grand Fir-White Fir Forest and Woodland	SAF 211: White Fir	Tree-dominated	Closed tree canopy	250 <= CH < 500	Tr Mediterranean California Mesic Mixed Conifer Forest and Woodland	Tree	Evergreen closed tree canopy	60 <= CC < 70	No	Conifer
KBOFUELRKLAMATHNF OKB_18	237.884	81.5818	4373.6	4.28065	0.184335	1494.5	26.95	14.9825	65	375	83	30	1402	0.366103		m	NE	12	12 <= CBD < 13	Succession Class E	0	No Disturbance	NA	Upland Forest	10280	Mediterranean California Mesic Mixed Conifer Forest and Woodland	117	Douglas Fir-White Fir-Sugar Pine-1	Conifer	106	Tree Cover >= 60 and < 70%	3	Northern California Coastal Range	1000	Mediterranean California Mesic Mixed Conifer Forest and Woodland	5	Conifer	Douglas-fir-Grand Fir-White Fir Forest and Woodland	SAF 211: White Fir	Tree-dominated	Closed tree canopy	250 <= CH < 500	Tr Mediterranean California Mesic Mixed Conifer Forest and Woodland	Tree	Evergreen closed tree canopy	60 <= CC < 70	No	Conifer
KBOFUELRKLAMATHNF OKB_23	123.844	80.4626	2721.45	7.41395	0.121829	1519.91	26.23	13.0775	25	375	70	24	1737	0.423117		h	NE	3	3 <= CBD < 4	Succession Class D	0	No Disturbance	NA	Upland Woodland	10280	Mediterranean California Mesic Mixed Conifer Forest and Woodland	117	Douglas Fir-White Fir-Sugar Pine-1	Conifer	102	Tree Cover >= 20 and < 30%	3	Northern California Coastal Range	1000	Mediterranean California Red Fir Forest	4	Conifer	Douglas-fir-Grand Fir-White Fir Forest and Woodland	SAF 211: White Fir	Tree-dominated	Closed tree canopy	250 <= CH < 500	Tr Mediterranean California Mesic Mixed Conifer Forest and Woodland	Tree	Evergreen closed tree canopy	20 <= CC < 30	No	Conifer
KBOFUELRKLAMATHNF OKC_04	961.528	97.6788	5008.24	12.6168	0.007633	1583.32	23.62	9.8275	0	0	60	14	1943	0.904524		n	W	0	Non-Forested	Succession Class A	0	No Disturbance	NA	Sparsely Vegetated	10980	California Montane Woodland and Chaparral	201	Greenleaf Manzanita-Whitethorn Ceanothus-3	Shrubland	100	Sparse Vegetation Canopy	3	Northern California Coastal Range	1000	Mediterranean California Red Fir Forest	1	Sparsely Vegetated	Sparse Vegetation	LF 33: Sparsely Vegetated	No Dominant Lifeform	Sparsely vegetated	Non-Forested	Sps Mediterranean California Sparsely Vegetated Systems	Sparse	Sparsely vegetated	Non-Forested	No	Conifer
KBOFUELRKLAMATHNF OKC_14	831.234	102.203	4654.47	12.7387	0.109658	1363.68	22.03	8.6125	35	175	56	14	2087	0.675458		m	E	6	6 <= CBD < 7	Succession Class D	0	No Disturbance	NA	Upland Forest	10440	Northern California Mesic Subalpine Woodland	134	Mountain Hemlock-Lodgepole Pine-5	Conifer	103	Tree Cover >= 30 and < 40%	3	Northern California Coastal Range	1000	Mediterranean California Red Fir Forest	5	Conifer	Mountain Hemlock Forest and Woodland	SAF 205: Mountain Hemlock	Tree-dominated	Open tree canopy	100 <= CH < 250	Tr Northern California Mesic Subalpine Woodland	Tree	Evergreen open tree canopy	30 <= CC < 40	No	Conifer
KBOFUELRKLAMATHNF OKC_26	283.959	107.234	481.353	15.4238	0.012727	1234.67	23.39	9.685	25	375	57	17	1777	0.699242		m	N	3	3 <= CBD < 4	Succession Class C	0	No Disturbance	NA	Upland Woodland	10320	Mediterranean California Red Fir Forest	121	Red Fir-1	Conifer	102	Tree Cover >= 20 and < 30%	3	Northern California Coastal Range	1000	Mediterranean California Red Fir Forest	4	Conifer	Red Fir Forest and Woodland	SAF 207: Red Fir	Tree-dominated	Open tree canopy	250 <= CH < 500	Tr Mediterranean California Red Fir Forest	Tree	Evergreen open tree canopy	20 <= CC < 30	No	Conifer
KBOFUELRKLAMATHNF SAA_01	241.927	74.8684	3466.79	0.630714	0.190275	953.76	31.46	16.8325	0	0	69	32	690	1.05407		e	SW	0	Non-Forested	Succession Class D	0	No Disturbance	NA	Upland Shrub	10270	Mediterranean California Dry-Mesic Mixed Conifer Forest and Woodland	116	Ponderosa Pine-Incense Cedar-1	Conifer	111	Shrub Cover >= 10 and < 20%	3	Northern California Coastal Range	1000	Mediterranean California Dry-Mesic Mixed Conifer Forest and Woodland	3	Shrubland	Chaparral	SRM 209: Montane Shrubland	Shrub-dominated	Shrubland	Non-Forested	Sh California Montane Woodland and Chaparral	Shrub	Evergreen shrubland	Non-Forested	No	Mixed
KBOFUELRKLAMATHNF SAA_13	458.068	78.6704	6270.95	2.4337	0.009416	1062.37	28.22	15.5	35	175	95	25	1187	0.524184		r	E	6	6 <= CBD < 7	Succession Class C	112	Fire	Low	Upland Woodland	10270	Mediterranean California Dry-Mesic Mixed Conifer Forest and Woodland	116	Ponderosa Pine-Incense Cedar-1	Conifer	103	Tree Cover >= 30 and < 40%	3	Northern California Coastal Range	1000	Mediterranean California Dry-Mesic Mixed Conifer Forest and Woodland	4	Conifer	Douglas-fir-Ponderosa Pine-Lodgepole Pine Forest and Woodland	SAF 243: Sierra Nevada Mixed Conifer	Tree-dominated	Open tree canopy	100 <= CH < 250	Tr Mediterranean California Dry-Mesic Mixed Conifer Forest and Woodland	Tree	Evergreen open tree canopy	30 <= CC < 40	No	Conifer
KBOFUELRKLAMATHNF SAA_24	65.844	80.5286	4363.35	4.04477	0.015311	1143.37	28.34	15.5325	0	0	93	22	1043	0.979486		m	S	0	Non-Forested	Succession Class A	112	Fire	Low	Upland Forest	10270	Mediterranean California Dry-Mesic Mixed Conifer Forest and Woodland	116	Ponderosa Pine-Incense Cedar-1	Conifer	122	Herb Cover >= 20 and < 30%	3	Northern California Coastal Range	1000	Mediterranean California Dry-Mesic Mixed Conifer Forest and Woodland	5	Grassland	Grassland	SRM 102: Idaho Fescue	Herbaceous / Nonvascular-dominated	Herbaceous - grassland	Non-Forested	He North Pacific Montane Grassland	Herb	Perennial graminoid grassland	Non-Forested	No	Conifer
KBOFUELRKLAMATHNF SAA_26	206.9	81.1003	3645.8	2.88952	0.13662	1096.16	29.73	15.775	65	375	69	32	982	0.730628		m	SE	12	12 <= CBD < 13	Succession Class E	0	No Disturbance	NA	Upland Forest	10270	Mediterranean California Dry-Mesic Mixed Conifer Forest and Woodland	116	Ponderosa Pine-Incense Cedar-1	Conifer	106	Tree Cover >= 60 and < 70%	3	Northern California Coastal Range	1000	Mediterranean California Dry-Mesic Mixed Conifer Forest and Woodland	5	Conifer	Douglas-fir-Ponderosa Pine-Lodgepole Pine Forest and Woodland	SAF 243: Sierra Nevada Mixed Conifer	Tree-dominated	Open tree canopy	250 <= CH < 500	Tr Mediterranean California Dry-Mesic Mixed Conifer Forest and Woodland	Tree	Evergreen open tree canopy	60 <= CC < 70	No	Conifer
KBOFUELRKLAMATHNF SBM1_10	975.565	84.0692	482.514	1.07079	0.186309	596.36	29.81	15.7475	0	0	90	32	1096	0.954556		m	S	0	Non-Forested	Succession Class D	0	No Disturbance	NA	Upland Shrub	10270	Mediterranean California Dry-Mesic Mixed Conifer Forest and Woodland	116	Ponderosa Pine-Incense Cedar-1	Conifer	111	Shrub Cover >= 10 and < 20%	3	Northern California Coastal Range	1000	Mediterranean California Dry-Mesic Mixed Conifer Forest and Woodland	3	Shrubland	Chaparral	SRM 209: Montane Shrubland	Shrub-dominated	Shrubland	Non-Forested	Sh California Montane Woodland and Chaparral	Shrub	Evergreen shrubland	Non-Forested	No	Conifer
KBOFUELRKLAMATHNF SBM2_02	821.344	84.3566	753.749	2.05779	1.0011	662.12	27.32	13.4575	25	375	78	28	1574	0.403182		m	NE	3	3 <= CBD < 4	Succession Class D	223	Mechanical Add	Moderate	Upland Forest	10280	Mediterranean California Mesic Mixed Conifer Forest and Woodland	117	Douglas Fir-White Fir-Sugar Pine-1	Conifer	102	Tree Cover >= 20 and < 30%	3	Northern California Coastal Range	1000	Mediterranean California Mesic Mixed Conifer Forest and Woodland	5	Conifer	Douglas-fir-Grand Fir-White Fir Forest and Woodland	SAF 211: White Fir	Tree-dominated	Closed tree canopy	250 <= CH < 500	Tr Mediterranean California Mesic Mixed Conifer Forest and Woodland	Tree	Evergreen closed tree canopy	20 <= CC < 30	No	Conifer
KBOFUELRKLAMATHNF SBM2_16	1693.1	83.3176	700.052	1.59226	0.121517	639.36	27.24	13.315	55	375	76	33	1510	0.592747		m	N	9	9 <= CBD < 10	Succession Class D	0	No Disturbance	NA	Upland Forest	10280	Mediterranean California Mesic Mixed Conifer Forest and Woodland	117	Douglas Fir-White Fir-Sugar Pine-1	Conifer	105	Tree Cover >= 50 and < 60%	3	Northern California Coastal Range	1000	Mediterranean California Mesic Mixed Conifer Forest and Woodland	5	Conifer	Douglas-fir-Grand Fir-White Fir Forest and Woodland	SAF 211: White Fir	Tree-dominated	Closed tree canopy	250 <= CH < 500	Tr Mediterranean California Mesic Mixed Conifer Forest and Woodland	Tree	Evergreen closed tree canopy	50 <= CC < 60	No	Conifer
KBOFUELRKLAMATHNF SBM3_06	783.964	85.3821	135.076	2.22991	0.055194	745.86	27.26	13.85	45	375	78	12	1395	0.757514		r	SE	6	6 <= CBD < 7	Succession Class D	113	Fire	Low	Upland Forest	10270	Mediterranean California Dry-Mesic Mixed Conifer Forest and Woodland	116	Ponderosa Pine-Incense Cedar-1	Conifer	104	Tree Cover >= 40 and < 50%	3	Northern California Coastal Range	1000	Mediterranean California Dry-Mesic Mixed Conifer Forest and Woodland	5	Conifer	Douglas-fir-Ponderosa Pine-Lodgepole Pine Forest and Woodland	SAF 243: Sierra Nevada Mixed Conifer	Tree-dominated	Open tree canopy	250 <= CH < 500	Tr Mediterranean California Dry-Mesic Mixed Conifer Forest and Woodland	Tree	Evergreen open tree canopy	40 <= CC < 50	No	Conifer
KBOFUELRKLAMATHNF SBM3_11	796.389	86.6682	789.475	1.98567	0.083968	780.12	28.18	14.665	45	175	73	15	1387	0.907241		n	SW	8	8 <= CBD < 9	Succession Class C	213	Mechanical Add	Low	Upland Woodland	10270	Mediterranean California Dry-Mesic Mixed Conifer Forest and Woodland	116	Ponderosa Pine-Incense Cedar-1	Conifer	104	Tree Cover >= 40 and < 50%	3	Northern California Coastal Range	1000	Mediterranean California Dry-Mesic Mixed Conifer Forest and Woodland	4	Conifer	Douglas-fir-Ponderosa Pine-Lodgepole Pine Forest and Woodland	SAF 243: Sierra Nevada Mixed Conifer	Tree-dominated	Open tree canopy	100 <= CH < 250	Tr Mediterranean California Dry-Mesic Mixed Conifer Forest and Woodland	Tree	Evergreen open tree canopy	40 <= CC < 50	No	Conifer
KBOFUELRKLAMATHNF SBPO_01	597.306	89.7447	610.356	1.99945	1.70067	596.97	25.8	14.6725	35	175	77	36	1286	0.360266		m	E	6	6 <= CBD < 7	Succession Class C	113	Fire	Low	Upland Forest	10280	Mediterranean California Mesic Mixed Conifer Forest and Woodland	117	Douglas Fir-White Fir-Sugar Pine-1	Conifer	103	Tree Cover >= 30 and < 40%	3	Northern California Coastal Range	1000	Mediterranean California Mesic Mixed Conifer Forest and Woodland	5	Conifer	Douglas-fir-Grand Fir-White Fir Forest and Woodland	SAF 211: White Fir	Tree-dominated	Closed tree canopy	100 <= CH < 250	Tr Mediterranean California Mesic Mixed Conifer Forest and Woodland	Tree	Evergreen closed tree canopy	30 <= CC < 40	No	Conifer
KBOFUELRKLAMATHNF SCA_04	105.258	83.2846	1728.64	0.766616	0.057631	634.95	29.79	15.71	75	375	90	24	928	0.443066		m	NE	16	16 <= CBD < 17	Succession Class E	0	No Disturbance	NA	Upland Forest	10280	Mediterranean California Mesic Mixed Conifer Forest and Woodland	117	Douglas Fir-White Fir-Sugar Pine-1	Conifer	107	Tree Cover >= 70 and < 80%	3	Northern California Coastal Range	1000	Mediterranean California Mesic Mixed Conifer Forest and Woodland	5	Conifer	Douglas-fir-Grand Fir-White Fir Forest and Woodland	SAF 211: White Fir	Tree-dominated	Closed tree canopy	250 <= CH < 500	Tr Mediterranean California Mesic Mixed Conifer Forest and Woodland	Tree	Evergreen closed tree canopy	70 <= CC < 80	No	Conifer
KBOFUELRKLAMATHNF SCA_15	418.763	79.2954	4254.2	3.31483	0.171807	677.8	28.63	15.0225	65	375	92	11	1178	0.790042		m	SE	12	12 <= CBD < 13	Succession Class E	0	No Disturbance	NA	Upland Forest	10270	Mediterranean California Dry-Mesic Mixed Conifer Forest and Woodland	116	Ponderosa Pine-Incense Cedar-1	Conifer	106	Tree Cover >= 60 and < 70%	3	Northern California Coastal Range	1000	Mediterranean California Mesic Mixed Conifer Forest and Woodland	5	Conifer	Douglas-fir-Ponderosa Pine-Lodgepole Pine Forest and Woodland	SAF 243: Sierra Nevada Mixed Conifer	Tree-dominated	Open tree canopy	250 <= CH < 500	Tr Mediterranean California Dry-Mesic Mixed Conifer Forest and Woodland	Tree	Evergreen open tree canopy	60 <= CC < 70	No	Conifer
KBOFUELRKLAMATHNF SCB_17	28.414	97.3868	1299.25	2.10642	0.215256	1641.81	25.7	10.0075	55	175	69	27	1893	1.03205		m	SW	11	11 <= CBD < 12	Succession Class C	0	No Disturbance	NA	Upland Forest	10280	Mediterranean California Mesic Mixed Conifer Forest and Woodland	117	Douglas Fir-White Fir-Sugar Pine-1	Conifer	105	Tree Cover >= 50 and < 60%	3	Northern California Coastal Range	1000	Mediterranean California Mesic Mixed Conifer Forest and Woodland	5	Conifer	Douglas-fir-Grand Fir-White Fir Forest and Woodland	SAF 211: White Fir	Tree-dominated	Closed tree canopy	100 <= CH < 250	Tr Mediterranean California Mesic Mixed Conifer Forest and Woodland	Tree	Evergreen closed tree canopy	50 <= CC < 60	No	Conifer
KBOFUELRKLAMATHNF SCB_26	132.93	98.859	1252.93	0.882326	0.044276	1202.87	26.67	12.56	45	375	65	16	1608	0.771052		m	SE	6	6 <= CBD < 7	Succession Class D	0	No Disturbance	NA	Wetland Shrub	10280	Mediterranean California Mesic Mixed Conifer Forest and Woodland	117	Douglas Fir-White Fir-Sugar Pine-1	Conifer	104	Tree Cover >= 40 and < 50%	3	Northern California Coastal Range	1000	Mediterranean California Mesic Mixed Conifer Forest and Woodland	8	Conifer	Douglas-fir-Grand Fir-White Fir Forest and Woodland	SAF 211: White Fir	Tree-dominated	Closed tree canopy	250 <= CH < 500	Tr Mediterranean California Mesic Mixed Conifer Forest and Woodland	Tree	Evergreen closed tree canopy	40 <= CC < 50	No	Conifer
KBOFUELRKLAMATHNF SCB_28	75.681	99.4117	1050.52	0.339411	0.332065	1054.19	26.84	13.9825	45	175	65	27	1458	0.701227		m	NW	8	8 <= CBD < 9	Succession Class C	0	No Disturbance	NA	Upland Forest	10280	Mediterranean California Mesic Mixed Conifer Forest and Woodland	117	Douglas Fir-White Fir-Sugar Pine-1	Conifer	104	Tree Cover >= 40 and < 50%	3	Northern California Coastal Range	1000	Mediterranean California Mesic Mixed Conifer Forest and Woodland	5	Conifer	Douglas-fir-Grand Fir-White Fir Forest and Woodland	SAF 211: White Fir	Tree-dominated	Closed tree canopy	100 <= CH < 250	Tr Mediterranean California Mesic Mixed Conifer Forest and Woodland	Tree	Evergreen closed tree canopy	40 <= CC < 50	No	Conifer
KBOFUELRKLAMATHNF SKEL_04	268.928	78.2928	4668.68	3.58923	0.144552	690.21	29.13	14.0725	55	375	95	31	1412	0.842278		m	NW	9	9 <= CBD < 10	Succession Class D	112	Fire	Low	Upland Forest	10280	Mediterranean California Mesic Mixed Conifer Forest and Woodland	117	Douglas Fir-White Fir-Sugar Pine-1	Conifer	105	Tree Cover >= 50 and < 60%	3	Northern California Coastal Range	1000	Mediterranean California Mesic Mixed Conifer Forest and Woodland	5	Conifer	Douglas-fir-Grand Fir-White Fir Forest and Woodland	SAF 211: White Fir	Tree-dominated	Closed tree canopy	250 <= CH < 500	Tr Mediterranean California Mesic Mixed Conifer Forest and Woodland	Tree	Evergreen closed tree canopy	50 <= CC < 60	No	Conifer
KBOFUELRKLAMATHNF SKEL_13	1208.35	79.8641	3118.92	2.10706	0.124276	622.61	28.87	15.3325	55	375	82	23	1243	0.954389		r	S	9	9 <= CBD < 10	Succession Class D	113	Fire	Low	Upland Forest	10270	Mediterranean California Dry-Mesic Mixed Conifer Forest and Woodland	116	Ponderosa Pine-Incense Cedar-1	Conifer	105	Tree Cover >= 50 and < 60%	3	Northern California Coastal Range	1000	Mediterranean California Dry-Mesic Mixed Conifer Forest and Woodland	5	Conifer	Douglas-fir-Ponderosa Pine-Lodgepole Pine Forest and Woodland	SAF 243: Sierra Nevada Mixed Conifer	Tree-dominated	Open tree canopy	250 <= CH < 500	Tr Mediterranean California Dry-Mesic Mixed Conifer Forest and Woodland	Tree	Evergreen open tree canopy	50 <= CC < 60	No	Conifer
KBOFUELRKLAMATHNF SODA_06	6.986	114.752	2994.94	11.0394	0.077645	792.37	27.48	13.8475	65	375	81	15	1093	0.945103		m	S	12	12 <= CBD < 13	Succession Class C	0	No Disturbance	NA	Upland Forest	11520	California Montane Riparian Systems	249	Black Cottonwood-Arroyo Willow-Madrone-3	Riparian	106	Tree Cover >= 60 and < 70%	3	Northern California Coastal Range	1200	California Montane Riparian Systems	5	Conifer	Douglas-fir-Ponderosa Pine-Lodgepole Pine Forest and Woodland	SAF 243: Sierra Nevada Mixed Conifer	Tree-dominated	Open tree canopy	250 <= CH < 500	Tr Mediterranean California Dry-Mesic Mixed Conifer Forest and Woodland	Tree	Evergreen open tree canopy	60 <= CC < 70	No	Conifer
KBOFUELRKLAMATHNF SODB_04	391.462	114.233	1898.25	12.5438	0.0085	1129.14	23.8	10.5225	35	375	83	12	1709	0.865923		m	SE	5	5 <= CBD < 6	Succession Class D	0	No Disturbance	NA	Upland Forest	10280	Mediterranean California Mesic Mixed Conifer Forest and Woodland	117	Douglas Fir-White Fir-Sugar Pine-1	Conifer	103	Tree Cover >= 30 and < 40%	3	Northern California Coastal Range	1000	Mediterranean California Mesic Mixed Conifer Forest and Woodland	5	Conifer	Douglas-fir-Grand Fir-White Fir Forest and Woodland	SAF 211: White Fir	Tree-dominated	Closed tree canopy	250 <= CH < 500	Tr Mediterranean California Mesic Mixed Conifer Forest and Woodland	Tree	Evergreen closed tree canopy	30 <= CC < 40	No	Conifer
KBOFUELRKLAMATHNF SODB_09	664.015	115.492	2396.89	13.29	0.132327	897.51	25.77	12.1025	75	375	72	11	1473	0.781471		m	SE	16	16 <= CBD < 17	Succession Class E	0	No Disturbance	NA	Upland Forest	10280	Mediterranean California Mesic Mixed Conifer Forest and Woodland	117	Douglas Fir-White Fir-Sugar Pine-1	Conifer	107	Tree Cover >= 70 and < 80%	3	Northern California Coastal Range	1000	Mediterranean California Mesic Mixed Conifer Forest and Woodland	5	Conifer	Douglas-fir-Grand Fir-White Fir Forest and Woodland	SAF 211: White Fir	Tree-dominated	Closed tree canopy	250 <= CH < 500	Tr Mediterranean California Mesic Mixed Conifer Forest and Woodland	Tree	Evergreen closed tree canopy	70 <= CC < 80	No	Conifer
KBOFUELRKLAMATHNF TOMM_11	733.166	89.8512	1132.28	1.68882	1.38911	544.64	28.93	16.035	75	375	87	28	1183	0.590173		m	E	16	16 <= CBD < 17	Succession Class E	0	No Disturbance	NA	Upland Forest	10270	Mediterranean California Dry-Mesic Mixed Conifer Forest and Woodland	116	Ponderosa Pine-Incense Cedar-1	Conifer	107	Tree Cover >= 70 and < 80%	3	Northern California Coastal Range	1000	Mediterranean California Mesic Mixed Conifer Forest and Woodland	5	Conifer	Douglas-fir-Ponderosa Pine-Lodgepole Pine Forest and Woodland	SAF 243: Sierra Nevada Mixed Conifer	Tree-dominated	Open tree canopy	250 <= CH < 500	Tr Mediterranean California Dry-Mesic Mixed Conifer Forest and Woodland	Tree	Evergreen open tree canopy	70 <= CC < 80	No	Conifer
KBOFUELRKLAMATHNF UKA_07	777.139	44.4619	612.595	0.882326	0.109654	1473.79	29.45	17.2125	75	175	85	30	457	0.766515		r	SE	22	22 <= CBD < 23	Succession Class B	112	Fire	Low	Upland Forest	10430	Mediterranean California Mixed Evergreen Forest	133	Douglas Fir-Tanoak-Pacific Madrone-1	Conifer	107	Tree Cover >= 70 and < 80%	3	Northern California Coastal Range	1000	Mediterranean California Mixed Evergreen Forest	5	Conifer	California Mixed Evergreen Forest and Woodland	SAF 234: Douglas-Fir-Tanoak-Pacific Madrone	Tree-dominated	Closed tree canopy	100 <= CH < 250	Tr Mediterranean California Mixed Evergreen Forest	Tree	Evergreen closed tree canopy	70 <= CC < 80	No	Conifer
KBOFUELRKLAMATHNF UKA_10	37.672	43.946	1177.89	1.2	0.058902	1482.36	30.29	17.045	45	375	76	26	304	0.417916		l	NE	6	6 <= CBD < 7	Succession Class C	112	Fire	Low	Upland Woodland	10430	Mediterranean California Mixed Evergreen Forest	133	Douglas Fir-Tanoak-Pacific Madrone-1	Conifer	104	Tree Cover >= 40 and < 50%	3	Northern California Coastal Range	1000	Mediterranean California Mixed Evergreen Forest	4	Conifer	California Mixed Evergreen Forest and Woodland	SAF 234: Douglas-Fir-Tanoak-Pacific Madrone	Tree-dominated	Closed tree canopy	250 <= CH < 500	Tr Mediterranean California Mixed Evergreen Forest	Tree	Evergreen closed tree canopy	40 <= CC < 50	No	Conifer
KBOFUELRKLAMATHNF UKA_18	1454.53	44.0882	1428.71	2.27783	0.073693	1532.91	30.39	16.4825	85	375	93	26	776	0.825428		e	SE	22	22 <= CBD < 23	Succession Class C	0	No Disturbance	NA	Upland Forest	10430	Mediterranean California Mixed Evergreen Forest	133	Douglas Fir-Tanoak-Pacific Madrone-1	Conifer	108	Tree Cover >= 80 and < 90%	3	Northern California Coastal Range	1000	Mediterranean California Mixed Evergreen Forest	5	Conifer	California Mixed Evergreen Forest and Woodland	SAF 234: Douglas-Fir-Tanoak-Pacific Madrone	Tree-dominated	Closed tree canopy	250 <= CH < 500	Tr Mediterranean California Mixed Evergreen Forest	Tree	Evergreen closed tree canopy	80 <= CC < 90	No	Mixed
KBOFUELRKLAMATHNF UKB_22	64.363	52.3177	5664.66	6.57712	0.161268	2133.83	26.69	13.6825	65	375	92	18	1388	0.972284		m	W	12	12 <= CBD < 13	Succession Class E	0	No Disturbance	NA	Upland Forest	10280	Mediterranean California Mesic Mixed Conifer Forest and Woodland	117	Douglas Fir-White Fir-Sugar Pine-1	Conifer	106	Tree Cover >= 60 and < 70%	3	Northern California Coastal Range	1000	Mediterranean California Mesic Mixed Conifer Forest and Woodland	5	Conifer	Douglas-fir-Grand Fir-White Fir Forest and Woodland	SAF 211: White Fir	Tree-dominated	Closed tree canopy	250 <= CH < 500	Tr Mediterranean California Mesic Mixed Conifer Forest and Woodland	Tree	Evergreen closed tree canopy	60 <= CC < 70	No	Conifer
KBOFUELRKLAMATHNF WFRK_01	813.665	111.459	4958.06	7.36767	0.218868	668.17	29.07	15.1875	65	175	81	23	973	0.84019		e	SE	16	16 <= CBD < 17	Succession Class B	0	No Disturbance	NA	Upland Forest	10270	Mediterranean California Dry-Mesic Mixed Conifer Forest and Woodland	116	Ponderosa Pine-Incense Cedar-1	Conifer	106	Tree Cover >= 60 and < 70%	3	Northern California Coastal Range	1000	Mediterranean California Dry-Mesic Mixed Conifer Forest and Woodland	5	Conifer	Douglas-fir-Ponderosa Pine-Lodgepole Pine Forest and Woodland	SAF 243: Sierra Nevada Mixed Conifer	Tree-dominated	Open tree canopy	100 <= CH < 250	Tr Mediterranean California Dry-Mesic Mixed Conifer Forest and Woodland	Tree	Evergreen open tree canopy	60 <= CC < 70	No	Mixed
KBOFUELRKLAMATHNF WFRK_11	853.13	111.056	5336.27	8.0409	0.043439	696.04	28.41	14.5375	65	375	79	29	1167	0.424984		r	N	12	12 <= CBD < 13	Succession Class E	0	No Disturbance	NA	Upland Forest	10270	Mediterranean California Dry-Mesic Mixed Conifer Forest and Woodland	116	Ponderosa Pine-Incense Cedar-1	Conifer	106	Tree Cover >= 60 and < 70%	3	Northern California Coastal Range	1000	Mediterranean California Dry-Mesic Mixed Conifer Forest and Woodland	5	Conifer	Douglas-fir-Ponderosa Pine-Lodgepole Pine Forest and Woodland	SAF 243: Sierra Nevada Mixed Conifer	Tree-dominated	Open tree canopy	250 <= CH < 500	Tr Mediterranean California Dry-Mesic Mixed Conifer Forest and Woodland	Tree	Evergreen open tree canopy	60 <= CC < 70	No	Conifer
KBOFUELRKLMNCRATERLATIC2_04	3671.96	189.578	8009.65	6.49609	0.904567	949.2	29.56	9.15	35	375	63	2	1621	0.716818		m	NE	5	5 <= CBD < 6	Succession Class D	113	Fire	Low	Upland Woodland	10270	Mediterranean California Dry-Mesic Mixed Conifer Forest and Woodland	116	Ponderosa Pine-Incense Cedar-1	Conifer	103	Tree Cover >= 30 and < 40%	7	Cascade Mountain Range	1000	Mediterranean California Dry-Mesic Mixed Conifer Forest and Woodland	4	Conifer	Ponderosa Pine Forest, Woodland and Savanna	SAF 237: Interior Ponderosa Pine	Tree-dominated	Open tree canopy	250 <= CH < 500	Tr Northern Rocky Mountain Ponderosa Pine Woodland and Savanna	Tree	Evergreen open tree canopy	30 <= CC < 40	CRLA	Conifer
KBOFUELRKLMNCRATERLATIC2_08	4167.09	188.737	7739.11	6.22339	1.04129	957.95	29.33	9.075	35	375	63	5	1641	0.687964		m	NE	5	5 <= CBD < 6	Succession Class D	0	No Disturbance	NA	Upland Woodland	10270	Mediterranean California Dry-Mesic Mixed Conifer Forest and Woodland	116	Ponderosa Pine-Incense Cedar-1	Conifer	103	Tree Cover >= 30 and < 40%	7	Cascade Mountain Range	1000	Mediterranean California Dry-Mesic Mixed Conifer Forest and Woodland	4	Conifer	Ponderosa Pine Forest, Woodland and Savanna	SAF 237: Interior Ponderosa Pine	Tree-dominated	Open tree canopy	250 <= CH < 500	Tr Northern Rocky Mountain Ponderosa Pine Woodland and Savanna	Tree	Evergreen open tree canopy	30 <= CC < 40	CRLA	Conifer
KBOFUELRKLMNCRATERLATICR_05	4214.83	189.966	8855.67	5.88184	0.198819	941.78	29.54	9.22	35	375	67	4	1596	0.703225		m	NE	5	5 <= CBD < 6	Succession Class D	113	Fire	Low	Upland Woodland	10280	Mediterranean California Mesic Mixed Conifer Forest and Woodland	117	Douglas Fir-White Fir-Sugar Pine-1	Conifer	103	Tree Cover >= 30 and < 40%	7	Cascade Mountain Range	1000	Mediterranean California Mesic Mixed Conifer Forest and Woodland	4	Conifer	Ponderosa Pine Forest, Woodland and Savanna	SAF 237: Interior Ponderosa Pine	Tree-dominated	Open tree canopy	250 <= CH < 500	Tr Northern Rocky Mountain Ponderosa Pine Woodland and Savanna	Tree	Evergreen open tree canopy	30 <= CC < 40	CRLA	Conifer
KBOFUELRKLMNCRATERLAWIC3_03	464.997	191.161	4701.59	0.429535	0.255867	819.62	29.3	10.26	55	375	78	1	1433	0.760372		m	SE	9	9 <= CBD < 10	Succession Class E	0	No Disturbance	NA	Upland Forest	10280	Mediterranean California Mesic Mixed Conifer Forest and Woodland	117	Douglas Fir-White Fir-Sugar Pine-1	Conifer	105	Tree Cover >= 50 and < 60%	7	Cascade Mountain Range	1000	Mediterranean California Mesic Mixed Conifer Forest and Woodland	5	Conifer	Douglas-fir-Grand Fir-White Fir Forest and Woodland	SAF 211: White Fir	Tree-dominated	Closed tree canopy	250 <= CH < 500	Tr Mediterranean California Mesic Mixed Conifer Forest and Woodland	Tree	Evergreen closed tree canopy	50 <= CC < 60	CRLA	Conifer
KBOFUELRKLMNCRATERLAWIC3_05	1556.49	190.052	4304.28	1.52971	0.047975	972.59	28.7	9.9275	65	175	74	5	1472	0.814686		m	S	16	16 <= CBD < 17	Succession Class B	0	No Disturbance	NA	Upland Forest	10180	East Cascades Mesic Montane Mixed-Conifer Forest and Woodland	109	Douglas Fir-Grand Fir Mix-3	Conifer	106	Tree Cover >= 60 and < 70%	7	Cascade Mountain Range	1000	East Cascades Mesic Montane Mixed-Conifer Forest and Woodland	5	Conifer	Douglas-fir-Grand Fir-White Fir Forest and Woodland	SAF 213: Grand Fir	Tree-dominated	Closed tree canopy	100 <= CH < 250	Tr East Cascades Mesic Montane Mixed-Conifer Forest and Woodland	Tree	Evergreen closed tree canopy	60 <= CC < 70	CRLA	Conifer
KBOFUELRKLMNCRATERLAWICA1_10	265.065	190.655	3330.97	0.127279	0.129182	1049.86	28.58	9.84	75	375	72	3	1495	0.784966		m	SE	16	16 <= CBD < 17	Succession Class E	0	No Disturbance	NA	Upland Forest	10280	Mediterranean California Mesic Mixed Conifer Forest and Woodland	117	Douglas Fir-White Fir-Sugar Pine-1	Conifer	107	Tree Cover >= 70 and < 80%	7	Cascade Mountain Range	1000	Mediterranean California Mesic Mixed Conifer Forest and Woodland	5	Conifer	Douglas-fir-Grand Fir-White Fir Forest and Woodland	SAF 211: White Fir	Tree-dominated	Closed tree canopy	250 <= CH < 500	Tr Mediterranean California Mesic Mixed Conifer Forest and Woodland	Tree	Evergreen closed tree canopy	70 <= CC < 80	CRLA	Conifer
KBOFUELRKLMNCRATERLAWICA2_12	421.08	191.72	3012.5	0.313209	0.231478	706.34	29.53	10.6375	35	175	70	1	1350	0.765593		m	SE	6	6 <= CBD < 7	Succession Class B	0	No Disturbance	NA	Upland Woodland	10531	Northern Rocky Mountain Ponderosa Pine Woodland and Savanna - Mesic	150	Ponderosa Pine-1	Conifer	103	Tree Cover >= 30 and < 40%	7	Cascade Mountain Range	1000	Mediterranean California Mesic Mixed Conifer Forest and Woodland	4	Conifer	Ponderosa Pine Forest, Woodland and Savanna	SAF 237: Interior Ponderosa Pine	Tree-dominated	Open tree canopy	100 <= CH < 250	Tr Northern Rocky Mountain Ponderosa Pine Woodland and Savanna	Tree	Evergreen open tree canopy	30 <= CC < 40	CRLA	Conifer
KBOFUELROAKS BIS1_06	586.161	104.127	1780.24	2.60292	0.589731	655.34	26.65	14.3825	0	0	64	26	797	1.03033		s	W	0	Non-Forested	Succession Class A	212	Mechanical Add	Low	Upland Forest	10270	Mediterranean California Dry-Mesic Mixed Conifer Forest and Woodland	116	Ponderosa Pine-Incense Cedar-1	Conifer	103	Tree Cover >= 30 and < 40%	2	Oregon Coastal Range	1000	Mediterranean California Dry-Mesic Mixed Conifer Forest and Woodland	5	Conifer	Conifer-Oak Forest and Woodland	SAF 246: California Black Oak	Tree-dominated	Open tree canopy	Non-Forested	Tr Mediterranean California Lower Montane Conifer Forest and Woodland	Tree	Evergreen open tree canopy	Non-Forested	No	Mixed
KBOFUELROAKS BOB4_04	247.383	102.273	611.712	3.46653	0.650289	594.77	28.39	15.3425	0	0	56	22	729	1.01048		w	S	0	Non-Forested	Succession Class D	213	Mechanical Add	Low	Upland Shrub	10290	Mediterranean California Mixed Oak Woodland	118	Oregon White Oak-Romers Fescue-Oatgrass-1	Hardwood	121	Herb Cover >= 10 and < 20%	2	Oregon Coastal Range	1000	Mediterranean California Mixed Oak Woodland	3	Grassland	Grassland	SRM 102: Idaho Fescue	Herbaceous / Nonvascular-dominated	Herbaceous - grassland	Non-Forested	He North Pacific Montane Grassland	Herb	Perennial graminoid grassland	Non-Forested	No	Mixed
KBOFUELROAKS BOB4_06	263.904	102.492	344.02	3.63446	0.881872	623.95	27.49	14.5775	0	0	54	20	745	0.987093		s	S	0	Non-Forested	Succession Class A	111	Fire	Low	Upland Shrub	10300	Mediterranean California Lower Montane Black Oak-Conifer Forest and Woodland	119	Ponderosa Pine-California Black Oak-1	Conifer	124	Herb Cover >= 40 and < 50%	2	Oregon Coastal Range	1000	Mediterranean California Dry-Mesic Mixed Conifer Forest and Woodland	3	Grassland	Grassland	SRM 102: Idaho Fescue	Herbaceous / Nonvascular-dominated	Herbaceous - grassland	Non-Forested	He North Pacific Montane Grassland	Herb	Perennial graminoid grassland	Non-Forested	No	Mixed
KBOFUELROAKS CHI1_06	783.779	99.9649	1695.99	2.56425	0.134219	649.39	26.26	14.8	0	0	76	30	893	0.936365		z	SE	0	Non-Forested	Succession Class A	213	Mechanical Add	Low	Upland Forest	10300	Mediterranean California Lower Montane Black Oak-Conifer Forest and Woodland	119	Ponderosa Pine-California Black Oak-1	Conifer	103	Tree Cover >= 30 and < 40%	2	Oregon Coastal Range	1000	Mediterranean California Dry-Mesic Mixed Conifer Forest and Woodland	5	Conifer	Conifer-Oak Forest and Woodland	SAF 246: California Black Oak	Tree-dominated	Open tree canopy	Non-Forested	Tr Mediterranean California Lower Montane Conifer Forest and Woodland	Tree	Evergreen open tree canopy	Non-Forested	No	Mixed
KBOFUELROAKS CHI1_10	524.195	100.044	1975.57	2.26932	0.132529	639.39	26.78	14.7	35	25	68	32	865	0.96997		z	W	9	9 <= CBD < 10	Succession Class A	213	Mechanical Add	Low	Upland Woodland	10300	Mediterranean California Lower Montane Black Oak-Conifer Forest and Woodland	119	Ponderosa Pine-California Black Oak-1	Conifer	103	Tree Cover >= 30 and < 40%	2	Oregon Coastal Range	1000	Mediterranean California Dry-Mesic Mixed Conifer Forest and Woodland	4	Conifer	California Mixed Evergreen Forest and Woodland	SAF 234: Douglas-Fir-Tanoak-Pacific Madrone	Tree-dominated	Closed tree canopy	0 < CH < 50	Tr Mediterranean California Mixed Evergreen Forest	Tree	Evergreen closed tree canopy	30 <= CC < 40	No	Mixed
KBOFUELROAKS DEM2_03	842.82	108.317	1737.31	9.60084	0.506866	730.59	25.66	14.1325	0	0	68	25	1050	0.982665		s	SW	0	Non-Forested	Succession Class A	0	No Disturbance	NA	Upland Shrub	10270	Mediterranean California Dry-Mesic Mixed Conifer Forest and Woodland	116	Ponderosa Pine-Incense Cedar-1	Conifer	121	Herb Cover >= 10 and < 20%	2	Oregon Coastal Range	1000	Mediterranean California Dry-Mesic Mixed Conifer Forest and Woodland	3	Grassland	Grassland	SRM 102: Idaho Fescue	Herbaceous / Nonvascular-dominated	Herbaceous - grassland	Non-Forested	He North Pacific Montane Grassland	Herb	Perennial graminoid grassland	Non-Forested	No	Mixed
KBOFUELROAKS FOR1_07	578.727	100.377	2253.11	1.73326	0.15276	631	28.06	14.545	45	175	68	30	762	0.776094		s	SE	8	8 <= CBD < 9	Succession Class C	213	Mechanical Add	Low	Upland Forest	10270	Mediterranean California Dry-Mesic Mixed Conifer Forest and Woodland	116	Ponderosa Pine-Incense Cedar-1	Conifer	104	Tree Cover >= 40 and < 50%	2	Oregon Coastal Range	1000	Mediterranean California Dry-Mesic Mixed Conifer Forest and Woodland	5	Conifer	Douglas-fir-Ponderosa Pine-Lodgepole Pine Forest and Woodland	SAF 243: Sierra Nevada Mixed Conifer	Tree-dominated	Open tree canopy	100 <= CH < 250	Tr Mediterranean California Dry-Mesic Mixed Conifer Forest and Woodland	Tree	Evergreen open tree canopy	40 <= CC < 50	No	Mixed
KBOFUELROAKS GEO1_11	578.428	103.526	2206.14	0.702282	0.498201	657.9	27.17	14.6225	0	0	72	22	764	0.971422		s	SW	0	Non-Forested	Succession Class A	212	Mechanical Add	Low	Upland Shrub	10270	Mediterranean California Dry-Mesic Mixed Conifer Forest and Woodland	116	Ponderosa Pine-Incense Cedar-1	Conifer	121	Herb Cover >= 10 and < 20%	2	Oregon Coastal Range	1000	Mediterranean California Dry-Mesic Mixed Conifer Forest and Woodland	3	Grassland	Grassland	SRM 102: Idaho Fescue	Herbaceous / Nonvascular-dominated	Herbaceous - grassland	Non-Forested	He North Pacific Montane Grassland	Herb	Perennial graminoid grassland	Non-Forested	No	Mixed
KBOFUELROAKS GEO1_17	984.024	103.793	2406.93	0.93771	0.137868	657.9	27.17	14.6225	0	0	70	12	864	0.886648		z	S	0	Non-Forested	Succession Class A	222	Mechanical Add	Moderate	Upland Woodland	10270	Mediterranean California Dry-Mesic Mixed Conifer Forest and Woodland	116	Ponderosa Pine-Incense Cedar-1	Conifer	102	Tree Cover >= 20 and < 30%	2	Oregon Coastal Range	1000	Mediterranean California Dry-Mesic Mixed Conifer Forest and Woodland	4	Conifer	Conifer-Oak Forest and Woodland	SAF 246: California Black Oak	Tree-dominated	Open tree canopy	Non-Forested	Tr Mediterranean California Lower Montane Conifer Forest and Woodland	Tree	Evergreen open tree canopy	Non-Forested	No	Mixed
KBOFUELROAKS MCOA_36	280.597	105.916	1976.82	8.03715	1.15855	648.43	25.73	14.065	0	0	53	36	938	1.07011		z	W	0	Non-Forested	Succession Class A	0	No Disturbance	NA	Upland Forest	10270	Mediterranean California Dry-Mesic Mixed Conifer Forest and Woodland	116	Ponderosa Pine-Incense Cedar-1	Conifer	102	Tree Cover >= 20 and < 30%	2	Oregon Coastal Range	1000	Mediterranean California Dry-Mesic Mixed Conifer Forest and Woodland	5	Conifer	Conifer-Oak Forest and Woodland	SAF 246: California Black Oak	Tree-dominated	Open tree canopy	Non-Forested	Tr Mediterranean California Lower Montane Conifer Forest and Woodland	Tree	Evergreen open tree canopy	Non-Forested	No	Mixed
KBOFUELROAKS MCOB_17	170.602	104.592	1507.5	6.82769	0.695719	625.79	28.88	15.315	0	0	55	21	740	0.891976		z	NW	0	Non-Forested	Succession Class A	0	No Disturbance	NA	Upland Woodland	10270	Mediterranean California Dry-Mesic Mixed Conifer Forest and Woodland	116	Ponderosa Pine-Incense Cedar-1	Conifer	103	Tree Cover >= 30 and < 40%	2	Oregon Coastal Range	1000	Mediterranean California Dry-Mesic Mixed Conifer Forest and Woodland	4	Conifer	Douglas-fir-Ponderosa Pine-Lodgepole Pine Forest and Woodland	SAF 243: Sierra Nevada Mixed Conifer	Tree-dominated	Open tree canopy	Non-Forested	Tr Mediterranean California Dry-Mesic Mixed Conifer Forest and Woodland	Tree	Evergreen open tree canopy	Non-Forested	No	Mixed
KBOFUELROAKS MCOB_18	185.302	104.457	1387.23	6.78139	0.503937	619.02	29.08	15.3625	25	25	55	10	702	0.864527		w	SW	1	1 <= CBD < 2	Succession Class A	0	No Disturbance	NA	Upland Woodland	10290	Mediterranean California Mixed Oak Woodland	118	Oregon White Oak-Romers Fescue-Oatgrass-1	Hardwood	102	Tree Cover >= 20 and < 30%	2	Oregon Coastal Range	1000	Mediterranean California Mixed Oak Woodland	4	Hardwood	Western Oak Woodland and Savanna	SAF 233: Oregon White Oak	Tree-dominated	Open tree canopy	0 < CH < 50	Tr Quercus garryana Woodland Alliance	Tree	Deciduous open tree canopy	20 <= CC < 30	No	Mixed
KBOFUELROAKS MCOB_20	142.989	104.144	1111.58	6.55649	0.229728	619.02	29.08	15.3625	0	0	58	11	629	0.804856		x	SE	0	Non-Forested	Succession Class A	212	Mechanical Add	Low	Upland Woodland	10270	Mediterranean California Dry-Mesic Mixed Conifer Forest and Woodland	116	Ponderosa Pine-Incense Cedar-1	Conifer	103	Tree Cover >= 30 and < 40%	2	Oregon Coastal Range	1000	Mediterranean California Dry-Mesic Mixed Conifer Forest and Woodland	4	Hardwood	Western Oak Woodland and Savanna	SAF 233: Oregon White Oak	Tree-dominated	Open tree canopy	Non-Forested	Tr North Pacific Oak Woodland	Tree	Deciduous open tree canopy	Non-Forested	No	Conifer
KBOFUELROAKS MCOB_26	308.778	105.382	1746.41	7.57617	1.05165	635.12	27.6	14.7475	0	0	55	25	858	0.984709		z	SW	0	Non-Forested	Succession Class A	0	No Disturbance	NA	Upland Shrub	10270	Mediterranean California Dry-Mesic Mixed Conifer Forest and Woodland	116	Ponderosa Pine-Incense Cedar-1	Conifer	121	Herb Cover >= 10 and < 20%	2	Oregon Coastal Range	1000	Mediterranean California Dry-Mesic Mixed Conifer Forest and Woodland	3	Grassland	Grassland	SRM 102: Idaho Fescue	Herbaceous / Nonvascular-dominated	Herbaceous - grassland	Non-Forested	He North Pacific Montane Grassland	Herb	Perennial graminoid grassland	Non-Forested	No	Mixed
KBOFUELROAKS PMA1_03	907.258	103.594	2064.05	1.35831	0.524118	644.46	26.96	14.615	65	175	75	30	842	0.483838		s	N	16	16 <= CBD < 17	Succession Class B	313	Mechanical Remove	Low	Upland Forest	10270	Mediterranean California Dry-Mesic Mixed Conifer Forest and Woodland	116	Ponderosa Pine-Incense Cedar-1	Conifer	106	Tree Cover >= 60 and < 70%	2	Oregon Coastal Range	1000	Mediterranean California Dry-Mesic Mixed Conifer Forest and Woodland	5	Conifer	Douglas-fir Forest and Woodland	SAF 229: Pacific Douglas-Fir	Tree-dominated	Closed tree canopy	100 <= CH < 250	Tr North Pacific Dry Douglas-fir(-Madrone) Forest and Woodland	Tree	Evergreen closed tree canopy	60 <= CC < 70	No	Mixed
KBOFUELROAKS PMA1_14	332.49	103.36	2665.38	0.513517	0.437592	639.79	28.73	15.0675	0	0	69	20	754	0.634634		z	N	0	Non-Forested	Succession Class A	0	No Disturbance	NA	Upland Forest	10270	Mediterranean California Dry-Mesic Mixed Conifer Forest and Woodland	116	Ponderosa Pine-Incense Cedar-1	Conifer	103	Tree Cover >= 30 and < 40%	2	Oregon Coastal Range	1000	Mediterranean California Dry-Mesic Mixed Conifer Forest and Woodland	5	Conifer	Douglas-fir-Ponderosa Pine-Lodgepole Pine Forest and Woodland	SAF 243: Sierra Nevada Mixed Conifer	Tree-dominated	Open tree canopy	Non-Forested	Tr Mediterranean California Dry-Mesic Mixed Conifer Forest and Woodland	Tree	Evergreen open tree canopy	Non-Forested	No	Mixed
KBOFUELROAKS STE1_11	871.138	105.016	1139.82	6.2539	0.416475	620.35	28.57	14.8375	0	0	60	25	757	0.597564		x	E	0	Non-Forested	Succession Class A	113	Fire	Low	Upland Woodland	10270	Mediterranean California Dry-Mesic Mixed Conifer Forest and Woodland	116	Ponderosa Pine-Incense Cedar-1	Conifer	102	Tree Cover >= 20 and < 30%	2	Oregon Coastal Range	1000	Mediterranean California Dry-Mesic Mixed Conifer Forest and Woodland	4	Hardwood	Western Oak Woodland and Savanna	SAF 233: Oregon White Oak	Tree-dominated	Open tree canopy	Non-Forested	Tr North Pacific Oak Woodland	Tree	Deciduous open tree canopy	Non-Forested	No	Conifer
KBOFUELROAKS STE2_03	785.227	107.373	916.304	8.59582	0.924842	674.54	27.2	14.235	0	0	71	26	944	1.01168		q	SW	0	Non-Forested	Succession Class A	0	No Disturbance	NA	Upland Woodland	10270	Mediterranean California Dry-Mesic Mixed Conifer Forest and Woodland	116	Ponderosa Pine-Incense Cedar-1	Conifer	101	Tree Cover >= 10 and < 20%	2	Oregon Coastal Range	1000	Mediterranean California Dry-Mesic Mixed Conifer Forest and Woodland	4	Conifer	Conifer-Oak Forest and Woodland	SAF 246: California Black Oak	Tree-dominated	Open tree canopy	Non-Forested	Tr Mediterranean California Lower Montane Conifer Forest and Woodland	Tree	Evergreen open tree canopy	Non-Forested	No	Conifer
KBOFUELROAKS STE2_07	1184.52	107.581	1294.76	8.7251	0.514535	702.76	24.96	13.25	55	375	70	26	1004	0.952693		z	W	9	9 <= CBD < 10	Succession Class D	213	Mechanical Add	Low	Upland Forest	10270	Mediterranean California Dry-Mesic Mixed Conifer Forest and Woodland	116	Ponderosa Pine-Incense Cedar-1	Conifer	105	Tree Cover >= 50 and < 60%	2	Oregon Coastal Range	1000	Mediterranean California Dry-Mesic Mixed Conifer Forest and Woodland	5	Conifer	Douglas-fir-Ponderosa Pine-Lodgepole Pine Forest and Woodland	SAF 243: Sierra Nevada Mixed Conifer	Tree-dominated	Open tree canopy	250 <= CH < 500	Tr Mediterranean California Dry-Mesic Mixed Conifer Forest and Woodland	Tree	Evergreen open tree canopy	50 <= CC < 60	No	Mixed
KBOFUELROAKS STE2_09	966.813	107.328	1117.02	8.45494	0.646912	674.54	27.2	14.235	75	375	70	17	884	0.930891		s	W	16	16 <= CBD < 17	Succession Class E	213	Mechanical Add	Low	Upland Forest	10270	Mediterranean California Dry-Mesic Mixed Conifer Forest and Woodland	116	Ponderosa Pine-Incense Cedar-1	Conifer	107	Tree Cover >= 70 and < 80%	2	Oregon Coastal Range	1000	Mediterranean California Dry-Mesic Mixed Conifer Forest and Woodland	5	Conifer	Douglas-fir Forest and Woodland	SAF 229: Pacific Douglas-Fir	Tree-dominated	Closed tree canopy	250 <= CH < 500	Tr North Pacific Dry Douglas-fir(-Madrone) Forest and Woodland	Tree	Evergreen closed tree canopy	70 <= CC < 80	No	Mixed
KBOFUELROAKS THO2_07	493.332	88.4123	647.232	0.51	0.077677	715.25	28.92	15.3025	75	175	79	28	574	0.61171		x	N	22	22 <= CBD < 23	Succession Class B	0	No Disturbance	NA	Upland Forest	10300	Mediterranean California Lower Montane Black Oak-Conifer Forest and Woodland	119	Ponderosa Pine-California Black Oak-1	Conifer	107	Tree Cover >= 70 and < 80%	2	Oregon Coastal Range	1000	Mediterranean California Lower Montane Black Oak-Conifer Forest and Woodland	5	Conifer	Douglas-fir Forest and Woodland	SAF 229: Pacific Douglas-Fir	Tree-dominated	Closed tree canopy	100 <= CH < 250	Tr North Pacific Dry Douglas-fir(-Madrone) Forest and Woodland	Tree	Evergreen closed tree canopy	70 <= CC < 80	No	Conifer
KBOFUELROAKS THO2_11	613.762	89.6169	577.491	1.17154	0.0345	764.05	27.34	14.8875	65	375	78	38	767	0.354782		s	N	12	12 <= CBD < 13	Succession Class B	0	No Disturbance	NA	Upland Forest	10300	Mediterranean California Lower Montane Black Oak-Conifer Forest and Woodland	119	Ponderosa Pine-California Black Oak-1	Conifer	106	Tree Cover >= 60 and < 70%	2	Oregon Coastal Range	1000	Mediterranean California Lower Montane Black Oak-Conifer Forest and Woodland	5	Conifer	Douglas-fir Forest and Woodland	SAF 229: Pacific Douglas-Fir	Tree-dominated	Closed tree canopy	250 <= CH < 500	Tr North Pacific Dry Douglas-fir(-Madrone) Forest and Woodland	Tree	Evergreen closed tree canopy	60 <= CC < 70	No	Mixed
KBOFUELROAKS WAT2_10	511.961	104.213	1607.37	8.50864	0.510585	635.97	27.76	15.3275	45	25	79	11	826	0.869923		e	SW	1	1 <= CBD < 2	Succession Class A	313	Mechanical Remove	Low	Upland Forest	10270	Mediterranean California Dry-Mesic Mixed Conifer Forest and Woodland	116	Ponderosa Pine-Incense Cedar-1	Conifer	104	Tree Cover >= 40 and < 50%	2	Oregon Coastal Range	1000	Mediterranean California Dry-Mesic Mixed Conifer Forest and Woodland	5	Conifer	Conifer-Oak Forest and Woodland	SAF 246: California Black Oak	Tree-dominated	Open tree canopy	0 < CH < 50	Tr Mediterranean California Lower Montane Conifer Forest and Woodland	Tree	Evergreen open tree canopy	40 <= CC < 50	No	Mixed
KBOFUELROAKS WATG_04	369.567	104.059	1549.23	8.61267	0.308909	652.75	27.63	14.9775	0	0	79	9	817	0.86137		p	W	0	Non-Forested	Succession Class A	323	Mechanical Remove	Moderate	Upland Forest	10300	Mediterranean California Lower Montane Black Oak-Conifer Forest and Woodland	119	Ponderosa Pine-California Black Oak-1	Conifer	103	Tree Cover >= 30 and < 40%	2	Oregon Coastal Range	1000	Mediterranean California Lower Montane Black Oak-Conifer Forest and Woodland	5	Conifer	Douglas-fir Forest and Woodland	SAF 229: Pacific Douglas-Fir	Tree-dominated	Closed tree canopy	Non-Forested	Tr North Pacific Dry Douglas-fir(-Madrone) Forest and Woodland	Tree	Evergreen closed tree canopy	Non-Forested	No	Mixed
KBOFUELRPOWERS BOLY_07	84.813	48.1654	1171.91	12.2615	0.052905	1820.43	22.59	13.1075	75	375	85	14	686	0.778422		q	SE	16	16 <= CBD < 17	Succession Class C	0	No Disturbance	NA	Upland Forest	10430	Mediterranean California Mixed Evergreen Forest	133	Douglas Fir-Tanoak-Pacific Madrone-1	Conifer	107	Tree Cover >= 70 and < 80%	2	Oregon Coastal Range	1000	Mediterranean California Mixed Evergreen Forest	5	Conifer	California Mixed Evergreen Forest and Woodland	SAF 234: Douglas-Fir-Tanoak-Pacific Madrone	Tree-dominated	Closed tree canopy	250 <= CH < 500	Tr Mediterranean California Mixed Evergreen Forest	Tree	Evergreen closed tree canopy	70 <= CC < 80	No	Conifer
KBOFUELRPOWERS BOLZ_07	412.579	47.4929	1850.57	11.9943	0.362412	1940.82	21.75	12.675	75	175	77	21	825	0.460078		f	NE	22	22 <= CBD < 23	Succession Class B	0	No Disturbance	NA	Upland Forest	10390	North Pacific Maritime Mesic-Wet Douglas-fir-Western Hemlock Forest	129	Douglas Fir-Western Hemlock-5	Conifer	107	Tree Cover >= 70 and < 80%	2	Oregon Coastal Range	1000	North Pacific Maritime Mesic-Wet Douglas-fir-Western Hemlock Forest	5	Conifer	Douglas-fir-Western Hemlock Forest and Woodland	SAF 230: Douglas-Fir-Western Hemlock	Tree-dominated	Closed tree canopy	100 <= CH < 250	Tr North Pacific Maritime Mesic-Wet Douglas-fir-Western Hemlock Forest	Tree	Evergreen closed tree canopy	70 <= CC < 80	No	Mixed
KBOFUELRPOWERS BORZ_02	180.691	46.7327	2646.66	11.4689	0.144586	2154.52	21.85	12.29	75	175	89	16	824	0.799627		e	SE	22	22 <= CBD < 23	Succession Class B	0	No Disturbance	NA	Upland Forest	10390	North Pacific Maritime Mesic-Wet Douglas-fir-Western Hemlock Forest	129	Douglas Fir-Western Hemlock-5	Conifer	107	Tree Cover >= 70 and < 80%	2	Oregon Coastal Range	1000	North Pacific Maritime Mesic-Wet Douglas-fir-Western Hemlock Forest	5	Conifer	Douglas-fir-Western Hemlock Forest and Woodland	SAF 230: Douglas-Fir-Western Hemlock	Tree-dominated	Closed tree canopy	100 <= CH < 250	Tr North Pacific Maritime Mesic-Wet Douglas-fir-Western Hemlock Forest	Tree	Evergreen closed tree canopy	70 <= CC < 80	No	Mixed
KBOFUELRPOWERS CLEZ_04	140.872	42.6545	2364.37	7.54338	0.151194	2444.08	21.79	12.3275	75	175	82	7	782	0.695106		ab	E	22	22 <= CBD < 23	Succession Class B	0	No Disturbance	NA	Upland Forest	10390	North Pacific Maritime Mesic-Wet Douglas-fir-Western Hemlock Forest	129	Douglas Fir-Western Hemlock-5	Conifer	107	Tree Cover >= 70 and < 80%	2	Oregon Coastal Range	1000	North Pacific Maritime Mesic-Wet Douglas-fir-Western Hemlock Forest	5	Conifer	Douglas-fir-Western Hemlock Forest and Woodland	SAF 230: Douglas-Fir-Western Hemlock	Tree-dominated	Closed tree canopy	100 <= CH < 250	Tr North Pacific Maritime Mesic-Wet Douglas-fir-Western Hemlock Forest	Tree	Evergreen closed tree canopy	70 <= CC < 80	No	Mixed
KBOFUELRPOWERS CLEZ_05	125.878	42.8322	2578.83	7.66545	0.138567	2364.38	21.8	12.725	75	375	72	10	766	0.698966		r	E	16	16 <= CBD < 17	Succession Class B	0	No Disturbance	NA	Upland Forest	10390	North Pacific Maritime Mesic-Wet Douglas-fir-Western Hemlock Forest	129	Douglas Fir-Western Hemlock-5	Conifer	107	Tree Cover >= 70 and < 80%	2	Oregon Coastal Range	1000	North Pacific Maritime Mesic-Wet Douglas-fir-Western Hemlock Forest	5	Conifer	Douglas-fir-Western Hemlock Forest and Woodland	SAF 230: Douglas-Fir-Western Hemlock	Tree-dominated	Closed tree canopy	250 <= CH < 500	Tr North Pacific Maritime Mesic-Wet Douglas-fir-Western Hemlock Forest	Tree	Evergreen closed tree canopy	70 <= CC < 80	No	Conifer
KBOFUELRPOWERS CLNY_02	231.71	44.95	3835.22	10.5454	0.183337	2376.05	21.9	12.39	35	175	66	26	983	0.578827		e	E	6	6 <= CBD < 7	Uncharacteristic Native Vegetation Cover / Struct*	0	No Disturbance	NA	Upland Woodland	10430	Mediterranean California Mixed Evergreen Forest	133	Douglas Fir-Tanoak-Pacific Madrone-1	Conifer	103	Tree Cover >= 30 and < 40%	2	Oregon Coastal Range	1000	Mediterranean California Mixed Evergreen Forest	4	Conifer	California Mixed Evergreen Forest and Woodland	SAF 234: Douglas-Fir-Tanoak-Pacific Madrone	Tree-dominated	Closed tree canopy	100 <= CH < 250	Tr Mediterranean California Mixed Evergreen Forest	Tree	Evergreen closed tree canopy	30 <= CC < 40	No	Mixed
KBOFUELRPOWERS COWY_06	660.868	49.0374	2019.35	12.4437	0.125493	1835.28	21.66	12.1925	75	375	95	30	995	0.6		q	N	16	16 <= CBD < 17	Succession Class E	0	No Disturbance	NA	Upland Forest	10370	North Pacific Maritime Dry-Mesic Douglas-fir-Western Hemlock Forest	127	Douglas Fir-Western Hemlock-3	Conifer	107	Tree Cover >= 70 and < 80%	2	Oregon Coastal Range	1000	North Pacific Maritime Dry-Mesic Douglas-fir-Western Hemlock Forest	5	Conifer	Douglas-fir-Western Hemlock Forest and Woodland	SAF 230: Douglas-Fir-Western Hemlock	Tree-dominated	Closed tree canopy	250 <= CH < 500	Tr North Pacific Maritime Dry-Mesic Douglas-fir-Western Hemlock Forest	Tree	Evergreen closed tree canopy	70 <= CC < 80	No	Conifer
KBOFUELRPOWERS FOGY_07	62.512	46.4936	3630.51	11.8325	0.081053	2190.19	22.55	11.815	75	375	79	29	904	0.891359		r	NW	16	16 <= CBD < 17	Succession Class C	0	No Disturbance	NA	Upland Forest	10430	Mediterranean California Mixed Evergreen Forest	133	Douglas Fir-Tanoak-Pacific Madrone-1	Conifer	107	Tree Cover >= 70 and < 80%	2	Oregon Coastal Range	1000	Mediterranean California Mixed Evergreen Forest	5	Conifer	Douglas-fir-Western Hemlock Forest and Woodland	SAF 230: Douglas-Fir-Western Hemlock	Tree-dominated	Closed tree canopy	250 <= CH < 500	Tr North Pacific Maritime Dry-Mesic Douglas-fir-Western Hemlock Forest	Tree	Evergreen closed tree canopy	70 <= CC < 80	No	Conifer
KBOFUELRPOWERS FOGZ_09	119.845	46.2483	3536.16	11.4365	0.073965	2268	21.85	12.25	45	25	73	21	889	0.867582		q	NW	12	12 <= CBD < 13	Succession Class A	0	No Disturbance	NA	Upland Forest	10430	Mediterranean California Mixed Evergreen Forest	133	Douglas Fir-Tanoak-Pacific Madrone-1	Conifer	104	Tree Cover >= 40 and < 50%	2	Oregon Coastal Range	1000	Mediterranean California Mixed Evergreen Forest	5	Conifer	California Mixed Evergreen Forest and Woodland	SAF 234: Douglas-Fir-Tanoak-Pacific Madrone	Tree-dominated	Closed tree canopy	0 < CH < 50	Tr Mediterranean California Mixed Evergreen Forest	Tree	Evergreen closed tree canopy	40 <= CC < 50	No	Conifer
KBOFUELRRIPARIAN BEA1_05	27.432	101.134	1731.31	6.44609	0.43259	662.06	27.34	14.4125	75	375	73	15	836	0.894587		z	W	16	16 <= CBD < 17	Succession Class E	213	Mechanical Add	Low	Upland Forest	10270	Mediterranean California Dry-Mesic Mixed Conifer Forest and Woodland	116	Ponderosa Pine-Incense Cedar-1	Conifer	107	Tree Cover >= 70 and < 80%	2	Oregon Coastal Range	1000	Mediterranean California Dry-Mesic Mixed Conifer Forest and Woodland	5	Conifer	California Mixed Evergreen Forest and Woodland	SAF 234: Douglas-Fir-Tanoak-Pacific Madrone	Tree-dominated	Closed tree canopy	250 <= CH < 500	Tr Mediterranean California Mixed Evergreen Forest	Tree	Evergreen closed tree canopy	70 <= CC < 80	No	Mixed
KBOFUELRRIPARIAN FTS1_37	472.571	101.464	1256.61	3.62305	0.454768	678.76	26.7	15.1675	35	175	94	25	771	1.00743		r	SW	6	6 <= CBD < 7	Succession Class C	122	Fire	Moderate	Upland Forest	10300	Mediterranean California Lower Montane Black Oak-Conifer Forest and Woodland	119	Ponderosa Pine-California Black Oak-1	Conifer	103	Tree Cover >= 30 and < 40%	2	Oregon Coastal Range	1000	Mediterranean California Dry-Mesic Mixed Conifer Forest and Woodland	5	Conifer-Hardwood	Conifer-Oak Forest and Woodland	SAF 246: California Black Oak	Tree-dominated	Open tree canopy	100 <= CH < 250	Tr Mediterranean California Lower Montane Black Oak - Conifer Forest and Woodland	Tree	Mixed evergreen-deciduous closed tree canopy	30 <= CC < 40	No	Conifer
KBOFUELRRIPARIAN FTS2_12	209.523	101.507	2130.37	5.01422	0.677736	686.03	26.38	15.0725	35	175	88	29	667	1.02026		r	SW	6	6 <= CBD < 7	Succession Class C	132	Fire	High	Upland Forest	10300	Mediterranean California Lower Montane Black Oak-Conifer Forest and Woodland	119	Ponderosa Pine-California Black Oak-1	Conifer	103	Tree Cover >= 30 and < 40%	2	Oregon Coastal Range	1000	Mediterranean California Dry-Mesic Mixed Conifer Forest and Woodland	5	Conifer-Hardwood	Conifer-Oak Forest and Woodland	SAF 246: California Black Oak	Tree-dominated	Open tree canopy	100 <= CH < 250	Tr Mediterranean California Lower Montane Black Oak - Conifer Forest and Woodland	Tree	Mixed evergreen-deciduous closed tree canopy	30 <= CC < 40	No	Conifer
KBOFUELRRIPARIAN STR1_04	51.155	95.5863	2489.93	1.50659	0.376414	633.07	28.7	15.4	35	175	79	20	619	0.779529		s	SE	1	1 <= CBD < 2	Succession Class C	122	Fire	Moderate	Upland Forest	10300	Mediterranean California Lower Montane Black Oak-Conifer Forest and Woodland	119	Ponderosa Pine-California Black Oak-1	Conifer	103	Tree Cover >= 30 and < 40%	2	Oregon Coastal Range	1000	Mediterranean California Dry-Mesic Mixed Conifer Forest and Woodland	5	Conifer	Conifer-Oak Forest and Woodland	SAF 246: California Black Oak	Tree-dominated	Open tree canopy	100 <= CH < 250	Tr Mediterranean California Lower Montane Conifer Forest and Woodland	Tree	Evergreen open tree canopy	30 <= CC < 40	No	Mixed
KBOFUELRRIPARIAN STR2_09	197.032	95.9448	2104.69	1.42618	0.562128	613.52	28.67	15.415	0	0	79	12	645	0.905602		s	S	0	Non-Forested	Succession Class A	112	Fire	Low	Upland Forest	10300	Mediterranean California Lower Montane Black Oak-Conifer Forest and Woodland	119	Ponderosa Pine-California Black Oak-1	Conifer	103	Tree Cover >= 30 and < 40%	2	Oregon Coastal Range	1000	Mediterranean California Dry-Mesic Mixed Conifer Forest and Woodland	5	Conifer	Conifer-Oak Forest and Woodland	SAF 246: California Black Oak	Tree-dominated	Open tree canopy	Non-Forested	Tr Mediterranean California Lower Montane Conifer Forest and Woodland	Tree	Evergreen open tree canopy	Non-Forested	No	Mixed
KBOFUELRRIPARIAN UST1_22	315.037	90.0074	3717.77	4.79494	0.821983	915.05	24.84	13.2825	55	375	90	35	1050	0.717884		r	SE	9	9 <= CBD < 10	Succession Class D	112	Fire	Low	Upland Forest	10270	Mediterranean California Dry-Mesic Mixed Conifer Forest and Woodland	116	Ponderosa Pine-Incense Cedar-1	Conifer	105	Tree Cover >= 50 and < 60%	2	Oregon Coastal Range	1000	Mediterranean California Dry-Mesic Mixed Conifer Forest and Woodland	5	Conifer	Douglas-fir-Ponderosa Pine-Lodgepole Pine Forest and Woodland	SAF 243: Sierra Nevada Mixed Conifer	Tree-dominated	Open tree canopy	250 <= CH < 500	Tr Mediterranean California Dry-Mesic Mixed Conifer Forest and Woodland	Tree	Evergreen open tree canopy	50 <= CC < 60	No	Conifer
KBOFUELRROGUERIVER RRP01_137	447.484	66.0442	3531.47	4.77745	0.092106	981.05	27.85	16.665	65	175	80	14	277	0.914376		y	S	16	16 <= CBD < 17	Succession Class C	0	No Disturbance	NA	Upland Woodland	10430	Mediterranean California Mixed Evergreen Forest	133	Douglas Fir-Tanoak-Pacific Madrone-1	Conifer	106	Tree Cover >= 60 and < 70%	2	Oregon Coastal Range	1000	Mediterranean California Mixed Evergreen Forest	4	Conifer	California Mixed Evergreen Forest and Woodland	SAF 234: Douglas-Fir-Tanoak-Pacific Madrone	Tree-dominated	Closed tree canopy	100 <= CH < 250	Tr Mediterranean California Mixed Evergreen Forest	Tree	Evergreen closed tree canopy	60 <= CC < 70	No	Conifer
KBOFUELRROGUERIVER RRP01_27	488.435	66.3425	3680.42	5.05943	0.206126	990.17	28.06	15.2675	45	375	92	23	432	1.01314		s	S	6	6 <= CBD < 7	Succession Class C	0	No Disturbance	NA	Upland Forest	10300	Mediterranean California Lower Montane Black Oak-Conifer Forest and Woodland	119	Ponderosa Pine-California Black Oak-1	Conifer	104	Tree Cover >= 40 and < 50%	2	Oregon Coastal Range	1000	Mediterranean California Lower Montane Black Oak-Conifer Forest and Woodland	5	Conifer	Douglas-fir Forest and Woodland	SAF 229: Pacific Douglas-Fir	Tree-dominated	Closed tree canopy	250 <= CH < 500	Tr North Pacific Dry Douglas-fir(-Madrone) Forest and Woodland	Tree	Evergreen closed tree canopy	40 <= CC < 50	No	Mixed
KBOFUELRROGUERIVER RRP02_145	274.138	65.8004	1639.78	2.51177	0.00157	1020.07	28.85	16.47	0	0	93	27	277	0.992145		y	S	0	Non-Forested	Non-burnable Urban	0	No Disturbance	NA	Undetermined	10430	Mediterranean California Mixed Evergreen Forest	133	Douglas Fir-Tanoak-Pacific Madrone-1	Conifer	25	Developed-Roads	2	Oregon Coastal Range	1000	Mediterranean California Mixed Evergreen Forest	0	Developed-Roads	Developed-Roads	No Dominant Lifeform	No Dominant Lifeform	No Dominant Lifeform	Non-Forested	Bau Developed-Roads	Developed	Developed	Non-Forested	No	Conifer
KBOFUELRROGUERIVER RRP02_35	204.897	66.6491	1880.21	3.44935	0.480332	991.1	28.25	16.615	75	375	92	15	285	0.625905		m	N	16	16 <= CBD < 17	Succession Class C	0	No Disturbance	NA	Upland Forest	10430	Mediterranean California Mixed Evergreen Forest	133	Douglas Fir-Tanoak-Pacific Madrone-1	Conifer	107	Tree Cover >= 70 and < 80%	2	Oregon Coastal Range	1000	Mediterranean California Mixed Evergreen Forest	5	Conifer	California Mixed Evergreen Forest and Woodland	SAF 234: Douglas-Fir-Tanoak-Pacific Madrone	Tree-dominated	Closed tree canopy	250 <= CH < 500	Tr Mediterranean California Mixed Evergreen Forest	Tree	Evergreen closed tree canopy	70 <= CC < 80	No	Conifer
KBOFUELRROGUERIVER RRP03_48	365.474	65.7262	3082.54	4.23946	0.216291	993.55	28.23	16.585	75	375	68	33	340	0.441736		r	N	16	16 <= CBD < 17	Succession Class C	213	Mechanical Add	Low	Upland Forest	10430	Mediterranean California Mixed Evergreen Forest	133	Douglas Fir-Tanoak-Pacific Madrone-1	Conifer	107	Tree Cover >= 70 and < 80%	2	Oregon Coastal Range	1000	Mediterranean California Mixed Evergreen Forest	5	Conifer	California Mixed Evergreen Forest and Woodland	SAF 234: Douglas-Fir-Tanoak-Pacific Madrone	Tree-dominated	Closed tree canopy	250 <= CH < 500	Tr Mediterranean California Mixed Evergreen Forest	Tree	Evergreen closed tree canopy	70 <= CC < 80	No	Conifer
KBOFUELRROGUERIVER RRP05_20	388.973	65.9664	1023.57	1.34063	0.054927	1045.27	28.86	15.8925	75	375	92	32	365	0.987767		r	W	16	16 <= CBD < 17	Succession Class C	0	No Disturbance	NA	Upland Forest	10430	Mediterranean California Mixed Evergreen Forest	133	Douglas Fir-Tanoak-Pacific Madrone-1	Conifer	107	Tree Cover >= 70 and < 80%	2	Oregon Coastal Range	1000	Mediterranean California Mixed Evergreen Forest	5	Conifer	California Mixed Evergreen Forest and Woodland	SAF 234: Douglas-Fir-Tanoak-Pacific Madrone	Tree-dominated	Closed tree canopy	250 <= CH < 500	Tr Mediterranean California Mixed Evergreen Forest	Tree	Evergreen closed tree canopy	70 <= CC < 80	No	Conifer
KBOFUELRROGUERIVER RRP06_52	308.838	65.2449	1619.4	2.7816	0.367087	1020.07	27.95	16.21	65	375	85	19	449	0.851015		r	SE	12	12 <= CBD < 13	Succession Class E	0	No Disturbance	NA	Upland Forest	10270	Mediterranean California Dry-Mesic Mixed Conifer Forest and Woodland	116	Ponderosa Pine-Incense Cedar-1	Conifer	106	Tree Cover >= 60 and < 70%	2	Oregon Coastal Range	1000	Mediterranean California Dry-Mesic Mixed Conifer Forest and Woodland	5	Conifer	Douglas-fir-Ponderosa Pine-Lodgepole Pine Forest and Woodland	SAF 243: Sierra Nevada Mixed Conifer	Tree-dominated	Open tree canopy	250 <= CH < 500	Tr Mediterranean California Dry-Mesic Mixed Conifer Forest and Woodland	Tree	Evergreen open tree canopy	60 <= CC < 70	No	Conifer
KBOFUELRROGUERIVER RRP07_174	195.957	65.2285	1232.52	0.042426	-0.001435	1027.88	28.45	16.6125	45	375	95	20	256	0.703961		ag	SE	1	1 <= CBD < 2	Succession Class B	0	No Disturbance	NA	Upland Forest	10430	Mediterranean California Mixed Evergreen Forest	133	Douglas Fir-Tanoak-Pacific Madrone-1	Conifer	104	Tree Cover >= 40 and < 50%	2	Oregon Coastal Range	1000	Mediterranean California Mixed Evergreen Forest	5	Conifer	Conifer-Oak Forest and Woodland	SAF 246: California Black Oak	Tree-dominated	Open tree canopy	250 <= CH < 500	Tr Mediterranean California Lower Montane Conifer Forest and Woodland	Tree	Evergreen open tree canopy	40 <= CC < 50	No	Shrubland
KBOFUELRROGUERIVER RRP07_41	22.481	64.8302	534.999	1.36062	0.044086	1094.99	28.93	16.365	65	375	87	30	307	1.03385		r	W	1	1 <= CBD < 2	Succession Class B	0	No Disturbance	NA	Upland Forest	10300	Mediterranean California Lower Montane Black Oak-Conifer Forest and Woodland	119	Ponderosa Pine-California Black Oak-1	Conifer	106	Tree Cover >= 60 and < 70%	2	Oregon Coastal Range	1000	Mediterranean California Lower Montane Black Oak-Conifer Forest and Woodland	5	Conifer	Conifer-Oak Forest and Woodland	SAF 246: California Black Oak	Tree-dominated	Open tree canopy	250 <= CH < 500	Tr Mediterranean California Lower Montane Conifer Forest and Woodland	Tree	Evergreen open tree canopy	60 <= CC < 70	No	Conifer
KBOFUELRROGUERIVER RRP09_175	539.215	65.7487	2033.76	0.228473	0.22682	1060.08	27.77	16.72	0	0	87	10	225	0.864071		y	S	0	Non-Forested	Burnable Agriculture	0	No Disturbance	NA	Upland Woodland	10350	North Pacific Dry Douglas-fir(-Madrone) Forest and Woodland	125	Douglas Fir-3	Conifer	122	Herb Cover >= 20 and < 30%	2	Oregon Coastal Range	1000	North Pacific Dry Douglas-fir(-Madrone) Forest and Woodland	4	Agricultural	Agricultural-Pasture and Hayland	LF 80: Agriculture	Herbaceous / Nonvascular-dominated	Herbaceous - grassland	Non-Forested	Dab Pasture and Hayland	Herb	Annual Graminoid/Forb	Non-Forested	No	Conifer
KBOFUELRROGUERIVER RRP11_191	156.302	74.6558	934.579	1.32883	0.073444	959.19	27.94	16.74	45	25	87	11	247	0.881666		v	SW	12	12 <= CBD < 13	Succession Class A	0	No Disturbance	NA	Upland Woodland	10430	Mediterranean California Mixed Evergreen Forest	133	Douglas Fir-Tanoak-Pacific Madrone-1	Conifer	104	Tree Cover >= 40 and < 50%	2	Oregon Coastal Range	1000	Mediterranean California Mixed Evergreen Forest	4	Conifer	California Mixed Evergreen Forest and Woodland	SAF 234: Douglas-Fir-Tanoak-Pacific Madrone	Tree-dominated	Closed tree canopy	0 < CH < 50	Tr Mediterranean California Mixed Evergreen Forest	Tree	Evergreen closed tree canopy	40 <= CC < 50	No	Agriculture
KBOFUELRROGUERIVER RRP11_195	8.863	73.786	636.003	0.95483	0.013417	970.42	27.91	16.7825	55	375	72	4	281	0.719604		y	E	9	9 <= CBD < 10	Succession Class B	212	Mechanical Add	Low	Upland Forest	10430	Mediterranean California Mixed Evergreen Forest	133	Douglas Fir-Tanoak-Pacific Madrone-1	Conifer	105	Tree Cover >= 50 and < 60%	2	Oregon Coastal Range	1000	Mediterranean California Mixed Evergreen Forest	5	Conifer	Douglas-fir-Ponderosa Pine-Lodgepole Pine Forest and Woodland	SAF 243: Sierra Nevada Mixed Conifer	Tree-dominated	Open tree canopy	250 <= CH < 500	Tr Mediterranean California Dry-Mesic Mixed Conifer Forest and Woodland	Tree	Evergreen open tree canopy	50 <= CC < 60	No	Conifer
KBOFUELRROGUERIVER RRP12_219	486.066	74.8068	878.134	1.91084	0.016344	959.19	27.94	16.74	0	0	80	2	251	0.756245		y	SE	0	Non-Forested	Non-burnable Urban	0	No Disturbance	NA	Undetermined	10430	Mediterranean California Mixed Evergreen Forest	133	Douglas Fir-Tanoak-Pacific Madrone-1	Conifer	25	Developed-Roads	2	Oregon Coastal Range	1000	Mediterranean California Mixed Evergreen Forest	0	Developed-Roads	Developed-Roads	No Dominant Lifeform	No Dominant Lifeform	No Dominant Lifeform	Non-Forested	Bau Developed-Roads	Developed	Developed	Non-Forested	No	Conifer
KBOFUELRROGUERIVER RRP14_214	346.33	75.117	707.165	3.42329	0.32457	944.49	27.79	16.7625	0	0	71	0	245	0.757518		y	SE	0	Non-Forested	Uncharacteristic Native Vegetation Cover / Struct*	0	No Disturbance	NA	Upland Herb	10430	Mediterranean California Mixed Evergreen Forest	133	Douglas Fir-Tanoak-Pacific Madrone-1	Conifer	122	Herb Cover >= 20 and < 30%	2	Oregon Coastal Range	1000	Mediterranean California Mixed Evergreen Forest	2	Grassland	Grassland	SRM 214: Coastal Prairie	Herbaceous / Nonvascular-dominated	Herbaceous - grassland	Non-Forested	He California Northern Coastal Grassland	Herb	Perennial graminoid grassland	Non-Forested	No	Conifer
KBOFUELRROGUERIVER RRP15_99	104.561	75.5513	388.093	3.71722	0.346485	942.07	27.98	16.695	35	175	82	1	253	0.76747		z	NW	6	6 <= CBD < 7	Succession Class B	212	Mechanical Add	Low	Wetland Forest	10300	Mediterranean California Lower Montane Black Oak-Conifer Forest and Woodland	119	Ponderosa Pine-California Black Oak-1	Conifer	103	Tree Cover >= 30 and < 40%	2	Oregon Coastal Range	1000	Mediterranean California Dry-Mesic Mixed Conifer Forest and Woodland	7	Riparian	Western Red-cedar-Western Hemlock Forest	SAF 222: Black Cottonwood-Willow	Tree-dominated	Open tree canopy	100 <= CH < 250	Tr North Pacific Swamp Systems	Tree	Mixed evergreen-deciduous open tree canopy	30 <= CC < 40	No	Mixed
KBOFUELRROGUERIVER RRP17_104	142.082	73.5942	1153.3	4.70455	0.154339	933.65	29.34	16.77	65	375	55	14	329	0.911876		s	S	12	12 <= CBD < 13	Succession Class C	0	No Disturbance	NA	Upland Forest	10430	Mediterranean California Mixed Evergreen Forest	133	Douglas Fir-Tanoak-Pacific Madrone-1	Conifer	106	Tree Cover >= 60 and < 70%	2	Oregon Coastal Range	1000	Mediterranean California Mixed Evergreen Forest	5	Conifer	Douglas-fir-Ponderosa Pine-Lodgepole Pine Forest and Woodland	SAF 243: Sierra Nevada Mixed Conifer	Tree-dominated	Open tree canopy	250 <= CH < 500	Tr Mediterranean California Dry-Mesic Mixed Conifer Forest and Woodland	Tree	Evergreen open tree canopy	60 <= CC < 70	No	Mixed
KBOFUELRROGUERIVER RRP17_15	230.017	73.5863	488.075	6.05829	0.009396	926.92	28.66	16.72	45	375	73	8	303	0.734871		r	E	6	6 <= CBD < 7	Burnable Urban	0	No Disturbance	NA	Undetermined	10430	Mediterranean California Mixed Evergreen Forest	133	Douglas Fir-Tanoak-Pacific Madrone-1	Conifer	14	Developed-Upland Evergreen Forest	2	Oregon Coastal Range	1000	Mediterranean California Mixed Evergreen Forest	0	Developed	Developed-Upland Evergreen Forest	LF 20: Developed	Tree-dominated	Open tree canopy	250 <= CH < 500	Dtc Urban Evergreen Forest	Tree	Evergreen open tree canopy	40 <= CC < 50	No	Conifer
KBOFUELRROGUERIVER RRP18_19	97.857	74.8316	44.536	6.48535	0.256201	921.25	27.83	16.7125	35	175	77	1	258	0.729737		s	NE	6	6 <= CBD < 7	Uncharacteristic Native Vegetation Cover / Struct*	212	Mechanical Add	Low	Upland Forest	10430	Mediterranean California Mixed Evergreen Forest	133	Douglas Fir-Tanoak-Pacific Madrone-1	Conifer	103	Tree Cover >= 30 and < 40%	2	Oregon Coastal Range	1000	Mediterranean California Mixed Evergreen Forest	5	Conifer	Douglas-fir-Ponderosa Pine-Lodgepole Pine Forest and Woodland	SAF 243: Sierra Nevada Mixed Conifer	Tree-dominated	Open tree canopy	100 <= CH < 250	Tr Mediterranean California Dry-Mesic Mixed Conifer Forest and Woodland	Tree	Evergreen open tree canopy	30 <= CC < 40	No	Mixed
KBOFUELRROGUERIVER RRP18_246	89.737	75.2843	178.613	6.33618	0.071984	922.23	29.23	16.7	0	0	77	2	250	0.792121		s	SW	0	Non-Forested	Water	0	No Disturbance	NA	Undetermined	11	Open Water	11	Open Water	Open Water	11	Open Water	2	Oregon Coastal Range	11	Open Water	0	Open Water	Open Water	Non-vegetated	Non-vegetated	Non-vegetated	Non-Forested	Ba Open Water	Water	Non-vegetated	Non-Forested	No	Mixed
KBOFUELRROGUERIVER RRP20_120	182.946	75.289	845.356	6.30064	0.191966	886.64	28.03	16.6775	75	375	69	25	312	0.644242		s	N	16	16 <= CBD < 17	Succession Class C	212	Mechanical Add	Low	Upland Forest	10430	Mediterranean California Mixed Evergreen Forest	133	Douglas Fir-Tanoak-Pacific Madrone-1	Conifer	107	Tree Cover >= 70 and < 80%	2	Oregon Coastal Range	1000	Mediterranean California Mixed Evergreen Forest	5	Conifer	California Mixed Evergreen Forest and Woodland	SAF 234: Douglas-Fir-Tanoak-Pacific Madrone	Tree-dominated	Closed tree canopy	250 <= CH < 500	Tr Mediterranean California Mixed Evergreen Forest	Tree	Evergreen closed tree canopy	70 <= CC < 80	No	Mixed
KBOFUELRROGUERIVER RRP20_125	415.808	75.8348	618.531	6.10063	0.531482	890.91	29.12	16.4375	75	375	82	24	362	0.647212		s	N	16	16 <= CBD < 17	Succession Class B	212	Mechanical Add	Low	Upland Forest	10300	Mediterranean California Lower Montane Black Oak-Conifer Forest and Woodland	119	Ponderosa Pine-California Black Oak-1	Conifer	107	Tree Cover >= 70 and < 80%	2	Oregon Coastal Range	1000	Mediterranean California Lower Montane Black Oak-Conifer Forest and Woodland	5	Conifer	Douglas-fir Forest and Woodland	SAF 229: Pacific Douglas-Fir	Tree-dominated	Closed tree canopy	250 <= CH < 500	Tr North Pacific Dry Douglas-fir(-Madrone) Forest and Woodland	Tree	Evergreen closed tree canopy	70 <= CC < 80	No	Mixed
KBOFUELRROGUERIVER RRP20_130	256.578	74.9712	591.989	6.51021	0.044233	886.64	28.03	16.6775	35	175	71	1	258	0.753819		r	N	6	6 <= CBD < 7	Uncharacteristic Native Vegetation Cover / Struct*	0	No Disturbance	NA	Wetland Forest	10430	Mediterranean California Mixed Evergreen Forest	133	Douglas Fir-Tanoak-Pacific Madrone-1	Conifer	103	Tree Cover >= 30 and < 40%	2	Oregon Coastal Range	1000	Mediterranean California Mixed Evergreen Forest	7	Conifer	Douglas-fir-Ponderosa Pine-Lodgepole Pine Forest and Woodland	SAF 243: Sierra Nevada Mixed Conifer	Tree-dominated	Open tree canopy	100 <= CH < 250	Tr Mediterranean California Dry-Mesic Mixed Conifer Forest and Woodland	Tree	Evergreen open tree canopy	30 <= CC < 40	No	Conifer
KBOFUELRROGUERIVER RRP21_121	353.142	74.8581	591.076	6.31826	0.049232	886.64	28.03	16.6775	45	375	76	1	262	0.760372		r	NW	6	6 <= CBD < 7	Succession Class B	0	No Disturbance	NA	Wetland Forest	10430	Mediterranean California Mixed Evergreen Forest	133	Douglas Fir-Tanoak-Pacific Madrone-1	Conifer	104	Tree Cover >= 40 and < 50%	2	Oregon Coastal Range	1000	Mediterranean California Mixed Evergreen Forest	7	Conifer	Douglas-fir-Ponderosa Pine-Lodgepole Pine Forest and Woodland	SAF 243: Sierra Nevada Mixed Conifer	Tree-dominated	Open tree canopy	250 <= CH < 500	Tr Mediterranean California Dry-Mesic Mixed Conifer Forest and Woodland	Tree	Evergreen open tree canopy	40 <= CC < 50	No	Conifer
KBOFUELRROGUERIVER RRP22_06	114.124	65.2775	1455.18	0.161555	0.165293	1027.88	28.87	16.635	0	0	87	0	211	0.754787		r	N	0	Non-Forested	Water	0	No Disturbance	NA	Upland Woodland	11	Open Water	11	Open Water	Open Water	11	Open Water	2	Oregon Coastal Range	11	Open Water	4	Open Water	Open Water	Non-vegetated	Non-vegetated	Non-vegetated	Non-Forested	Ba Open Water	Water	Non-vegetated	Non-Forested	No	Conifer
KBOFUELRROGUERIVER RRPBT_225	637.294	74.1439	1175.33	4.42995	0.118312	934.15	27.92	16.7325	45	175	80	11	295	0.843161		s	SE	8	8 <= CBD < 9	Succession Class C	0	No Disturbance	NA	Upland Woodland	10430	Mediterranean California Mixed Evergreen Forest	133	Douglas Fir-Tanoak-Pacific Madrone-1	Conifer	104	Tree Cover >= 40 and < 50%	2	Oregon Coastal Range	1000	Mediterranean California Mixed Evergreen Forest	4	Conifer	Douglas-fir-Ponderosa Pine-Lodgepole Pine Forest and Woodland	SAF 243: Sierra Nevada Mixed Conifer	Tree-dominated	Open tree canopy	100 <= CH < 250	Tr Mediterranean California Dry-Mesic Mixed Conifer Forest and Woodland	Tree	Evergreen open tree canopy	40 <= CC < 50	No	Mixed
KBOFUELRUPPERKLAMATH250_06	2256.28	173.393	946.006	11.7941	9.63991	564.95	28.05	12.175	45	175	61	2	1381	0.779899		m	SW	8	8 <= CBD < 9	Succession Class C	0	No Disturbance	NA	Upland Woodland	10280	Mediterranean California Mesic Mixed Conifer Forest and Woodland	117	Douglas Fir-White Fir-Sugar Pine-1	Conifer	104	Tree Cover >= 40 and < 50%	7	Cascade Mountain Range	1000	Mediterranean California Mesic Mixed Conifer Forest and Woodland	4	Conifer	Douglas-fir-Grand Fir-White Fir Forest and Woodland	SAF 211: White Fir	Tree-dominated	Closed tree canopy	100 <= CH < 250	Tr Mediterranean California Mesic Mixed Conifer Forest and Woodland	Tree	Evergreen closed tree canopy	40 <= CC < 50	No	Conifer
KBOFUELRUPPERKLAMATH3455_11	1217.62	175.473	1711.92	1.93145	0.24923	822.52	28.52	10.6925	75	375	72	5	1352	0.696154		m	N	16	16 <= CBD < 17	Succession Class E	0	No Disturbance	NA	Upland Forest	10280	Mediterranean California Mesic Mixed Conifer Forest and Woodland	117	Douglas Fir-White Fir-Sugar Pine-1	Conifer	107	Tree Cover >= 70 and < 80%	7	Cascade Mountain Range	1000	Mediterranean California Mesic Mixed Conifer Forest and Woodland	5	Conifer	Douglas-fir-Grand Fir-White Fir Forest and Woodland	SAF 211: White Fir	Tree-dominated	Closed tree canopy	250 <= CH < 500	Tr Mediterranean California Mesic Mixed Conifer Forest and Woodland	Tree	Evergreen closed tree canopy	70 <= CC < 80	No	Conifer
KBOFUELRUPPERKLAMATH3455_19	29.231	175.066	3226.95	3.60013	0.27297	999.99	28.21	10.3725	75	375	94	19	1435	0.955855		m	W	16	16 <= CBD < 17	Succession Class E	0	No Disturbance	NA	Upland Forest	10280	Mediterranean California Mesic Mixed Conifer Forest and Woodland	117	Douglas Fir-White Fir-Sugar Pine-1	Conifer	107	Tree Cover >= 70 and < 80%	7	Cascade Mountain Range	1000	Mediterranean California Mesic Mixed Conifer Forest and Woodland	5	Conifer	California Mixed Evergreen Forest and Woodland	SAF 234: Douglas-Fir-Tanoak-Pacific Madrone	Tree-dominated	Closed tree canopy	250 <= CH < 500	Tr Mediterranean California Mixed Evergreen Forest	Tree	Evergreen closed tree canopy	70 <= CC < 80	No	Conifer
KBOFUELRUPPERKLAMATH3633_01	2700.83	172.627	1516.95	0.429535	0.077479	1120.48	27.46	9.89	45	175	68	5	1525	0.723625		m	E	8	8 <= CBD < 9	Succession Class C	0	No Disturbance	NA	Upland Forest	10280	Mediterranean California Mesic Mixed Conifer Forest and Woodland	117	Douglas Fir-White Fir-Sugar Pine-1	Conifer	104	Tree Cover >= 40 and < 50%	7	Cascade Mountain Range	1000	Mediterranean California Mesic Mixed Conifer Forest and Woodland	5	Conifer	Douglas-fir-Grand Fir-White Fir Forest and Woodland	SAF 211: White Fir	Tree-dominated	Closed tree canopy	100 <= CH < 250	Tr Mediterranean California Mesic Mixed Conifer Forest and Woodland	Tree	Evergreen closed tree canopy	40 <= CC < 50	No	Conifer
KBOFUELRUPPERKLAMATH3633_07	2001.96	171.155	1083.3	1.47275	0.195309	1250.6	27.38	9.8175	45	375	87	10	1577	0.810367		m	SE	6	6 <= CBD < 7	Succession Class D	0	No Disturbance	NA	Upland Forest	10280	Mediterranean California Mesic Mixed Conifer Forest and Woodland	117	Douglas Fir-White Fir-Sugar Pine-1	Conifer	104	Tree Cover >= 40 and < 50%	7	Cascade Mountain Range	1000	Mediterranean California Mesic Mixed Conifer Forest and Woodland	5	Conifer	Douglas-fir-Grand Fir-White Fir Forest and Woodland	SAF 211: White Fir	Tree-dominated	Closed tree canopy	250 <= CH < 500	Tr Mediterranean California Mesic Mixed Conifer Forest and Woodland	Tree	Evergreen closed tree canopy	40 <= CC < 50	No	Conifer
KBOFUELRUPPERKLAMATH3633_16	431.868	169.212	1978.24	3.07847	0.024025	1425.62	26.47	9.305	35	375	81	5	1697	0.820691		m	W	5	5 <= CBD < 6	Succession Class C	0	No Disturbance	NA	Upland Forest	10320	Mediterranean California Red Fir Forest	121	Red Fir-1	Conifer	103	Tree Cover >= 30 and < 40%	7	Cascade Mountain Range	1000	Mediterranean California Red Fir Forest	5	Conifer	Douglas-fir-Grand Fir-White Fir Forest and Woodland	SAF 211: White Fir	Tree-dominated	Closed tree canopy	250 <= CH < 500	Tr Mediterranean California Mesic Mixed Conifer Forest and Woodland	Tree	Evergreen closed tree canopy	30 <= CC < 40	No	Conifer
KBOFUELRUPPERKLAMATHANCR_15	4521.02	256.959	664.115	70.8988	70.6127	438.42	29.54	11.84	0	0	23	1	1486	0.772708		n	SW	0	Non-Forested	Succession Class B	0	No Disturbance	NA	Upland Shrub	11260	Inter-Mountain Basins Montane Sagebrush Steppe	222	Mountain Sagebrush-Bluebunch Wheatgrass-Idaho Fes*	Shrubland	113	Shrub Cover >= 30 and < 40%	7	Cascade Mountain Range	1000	Columbia Plateau Western Juniper Woodland and Savanna	3	Shrubland	Low Sagebrush Shrubland and Steppe	SRM 406: Low Sagebrush	Shrub-dominated	Herbaceous - shrub-steppe	Non-Forested	Sh Columbia Plateau Low Sagebrush Steppe	Shrub	Perennial graminoid steppe	Non-Forested	No	Conifer
KBOFUELRUPPERKLAMATHBEFL_05	1321.57	172.442	188.648	13.9317	9.90848	535.84	29.16	12.325	0	0	64	9	1298	0.783095		x	SE	0	Non-Forested	Succession Class B	0	No Disturbance	NA	Upland Forest	10270	Mediterranean California Dry-Mesic Mixed Conifer Forest and Woodland	116	Ponderosa Pine-Incense Cedar-1	Conifer	106	Tree Cover >= 60 and < 70%	7	Cascade Mountain Range	1000	Mediterranean California Dry-Mesic Mixed Conifer Forest and Woodland	5	Conifer	Conifer-Oak Forest and Woodland	SAF 246: California Black Oak	Tree-dominated	Open tree canopy	Non-Forested	Tr Mediterranean California Lower Montane Conifer Forest and Woodland	Tree	Evergreen open tree canopy	Non-Forested	No	Conifer
KBOFUELRUPPERKLAMATHBEFL_07	1790.47	172.461	391.444	14.3393	10.1334	522.15	29.37	12.54	35	375	63	30	1154	0.632488		s	E	5	5 <= CBD < 6	Succession Class D	0	No Disturbance	NA	Upland Woodland	10280	Mediterranean California Mesic Mixed Conifer Forest and Woodland	117	Douglas Fir-White Fir-Sugar Pine-1	Conifer	103	Tree Cover >= 30 and < 40%	7	Cascade Mountain Range	1000	Mediterranean California Mesic Mixed Conifer Forest and Woodland	4	Conifer	California Mixed Evergreen Forest and Woodland	SAF 234: Douglas-Fir-Tanoak-Pacific Madrone	Tree-dominated	Closed tree canopy	250 <= CH < 500	Tr Mediterranean California Mixed Evergreen Forest	Tree	Evergreen closed tree canopy	30 <= CC < 40	No	Mixed
KBOFUELRUPPERKLAMATHBEFL_12	1269.72	172.814	576.287	13.9483	10.1689	523.7	29.64	13.0075	25	175	69	29	1293	0.879335		s	SE	4	4 <= CBD < 5	Succession Class C	0	No Disturbance	NA	Upland Woodland	10270	Mediterranean California Dry-Mesic Mixed Conifer Forest and Woodland	116	Ponderosa Pine-Incense Cedar-1	Conifer	102	Tree Cover >= 20 and < 30%	7	Cascade Mountain Range	1000	Mediterranean California Dry-Mesic Mixed Conifer Forest and Woodland	4	Conifer	Douglas-fir-Ponderosa Pine-Lodgepole Pine Forest and Woodland	SAF 243: Sierra Nevada Mixed Conifer	Tree-dominated	Open tree canopy	100 <= CH < 250	Tr Mediterranean California Dry-Mesic Mixed Conifer Forest and Woodland	Tree	Evergreen open tree canopy	20 <= CC < 30	No	Mixed
KBOFUELRUPPERKLAMATHBRMO_08	3142.05	233.711	1102.29	46.205	45.773	384.14	28.94	11.515	0	0	35	1	1585	0.732262		z	NE	0	Non-Forested	Succession Class C	0	No Disturbance	NA	Upland Woodland	11250	Inter-Mountain Basins Big Sagebrush Steppe	220	Wyoming Big Sage-Wheatgrass-3	Shrubland	112	Shrub Cover >= 20 and < 30%	7	Cascade Mountain Range	1100	Inter-Mountain Basins Montane Sagebrush Steppe	4	Shrubland	Big Sagebrush Shrubland and Steppe	SRM 402: Mountain Big Sagebrush	Shrub-dominated	Herbaceous - shrub-steppe	Non-Forested	Sh Inter-Mountain Basins Montane Sagebrush Steppe	Shrub	Perennial graminoid steppe	Non-Forested	No	Mixed
KBOFUELRUPPERKLAMATHBUCK2_05	6552.83	227.957	1216.67	43.6523	42.7218	349.79	28.85	11.98	35	175	41	14	1525	0.586745		z	N	6	6 <= CBD < 7	Succession Class B	0	No Disturbance	NA	Upland Woodland	10532	Northern Rocky Mountain Ponderosa Pine Woodland and Savanna - Xeric	149	Ponderosa Pine-3	Conifer	103	Tree Cover >= 30 and < 40%	7	Cascade Mountain Range	1100	Northern Rocky Mountain Ponderosa Pine Woodland and Savanna	4	Conifer	Ponderosa Pine Forest, Woodland and Savanna	SAF 237: Interior Ponderosa Pine	Tree-dominated	Open tree canopy	100 <= CH < 250	Tr Northern Rocky Mountain Ponderosa Pine Woodland and Savanna	Tree	Evergreen open tree canopy	30 <= CC < 40	No	Mixed
KBOFUELRUPPERKLAMATHBUHE_10	2696.8	252.124	643.293	69.6168	69.0379	385.18	29.72	12.0025	0	0	25	1	1413	0.769073		ah	SW	0	Non-Forested	Succession Class D	0	No Disturbance	NA	Upland Shrub	11250	Inter-Mountain Basins Big Sagebrush Steppe	220	Wyoming Big Sage-Wheatgrass-3	Shrubland	113	Shrub Cover >= 30 and < 40%	7	Cascade Mountain Range	1000	Columbia Plateau Western Juniper Woodland and Savanna	3	Shrubland	Low Sagebrush Shrubland and Steppe	SRM 406: Low Sagebrush	Shrub-dominated	Herbaceous - shrub-steppe	Non-Forested	Sh Columbia Plateau Low Sagebrush Steppe	Shrub	Perennial graminoid steppe	Non-Forested	No	Shrubland
KBOFUELRUPPERKLAMATHBUMP_04	3618.99	252.73	565.689	69.1978	68.7214	408.35	29.36	12.0225	0	0	26	1	1464	0.777637		ag	S	0	Non-Forested	Succession Class D	0	No Disturbance	NA	Upland Shrub	11250	Inter-Mountain Basins Big Sagebrush Steppe	220	Wyoming Big Sage-Wheatgrass-3	Shrubland	113	Shrub Cover >= 30 and < 40%	7	Cascade Mountain Range	1000	Columbia Plateau Western Juniper Woodland and Savanna	3	Shrubland	Low Sagebrush Shrubland and Steppe	SRM 406: Low Sagebrush	Shrub-dominated	Herbaceous - shrub-steppe	Non-Forested	Sh Columbia Plateau Low Sagebrush Steppe	Shrub	Perennial graminoid steppe	Non-Forested	No	Shrubland
KBOFUELRUPPERKLAMATHBUMP_07	4065.1	255.071	1560.98	70.5196	70.124	419.45	29.57	11.905	0	0	24	1	1462	0.761274		ag	SE	0	Non-Forested	Succession Class B	0	No Disturbance	NA	Upland Shrub	11260	Inter-Mountain Basins Montane Sagebrush Steppe	222	Mountain Sagebrush-Bluebunch Wheatgrass-Idaho Fes*	Shrubland	113	Shrub Cover >= 30 and < 40%	7	Cascade Mountain Range	1000	Columbia Plateau Western Juniper Woodland and Savanna	3	Shrubland	Low Sagebrush Shrubland and Steppe	SRM 406: Low Sagebrush	Shrub-dominated	Herbaceous - shrub-steppe	Non-Forested	Sh Columbia Plateau Low Sagebrush Steppe	Shrub	Perennial graminoid steppe	Non-Forested	No	Shrubland
KBOFUELRUPPERKLAMATHCARE_10	539.552	272.487	192.797	79.1956	77.8187	441.02	30.02	11.8125	0	0	29	6	1470	0.835332		ah	W	0	Non-Forested	Succession Class B	0	No Disturbance	NA	Upland Shrub	10170	Columbia Plateau Western Juniper Woodland and Savanna	108	Western Juniper-Low Sage-3	Conifer	112	Shrub Cover >= 20 and < 30%	7	Cascade Mountain Range	1000	Columbia Plateau Western Juniper Woodland and Savanna	3	Shrubland	Low Sagebrush Shrubland and Steppe	SRM 406: Low Sagebrush	Shrub-dominated	Herbaceous - shrub-steppe	Non-Forested	Sh Columbia Plateau Low Sagebrush Steppe	Shrub	Perennial graminoid steppe	Non-Forested	No	Shrubland
KBOFUELRUPPERKLAMATHCFR1_07	767.838	205.986	2226.56	10.0976	8.98089	454.98	29.88	11.2725	0	0	52	4	1311	0.746801		n	N	0	Non-Forested	Succession Class C	0	No Disturbance	NA	Upland Shrub	11260	Inter-Mountain Basins Montane Sagebrush Steppe	222	Mountain Sagebrush-Bluebunch Wheatgrass-Idaho Fes*	Shrubland	111	Shrub Cover >= 10 and < 20%	7	Cascade Mountain Range	1000	Columbia Plateau Western Juniper Woodland and Savanna	3	Shrubland	Big Sagebrush Shrubland and Steppe	SRM 402: Mountain Big Sagebrush	Shrub-dominated	Herbaceous - shrub-steppe	Non-Forested	Sh Inter-Mountain Basins Montane Sagebrush Steppe	Shrub	Perennial graminoid steppe	Non-Forested	No	Conifer
KBOFUELRUPPERKLAMATHCFR1_10	620.235	205.568	2517.24	11.4123	9.52091	455.14	29.83	11.32	45	175	44	3	1317	0.771871		n	NW	8	8 <= CBD < 9	Succession Class B	0	No Disturbance	NA	Upland Woodland	10532	Northern Rocky Mountain Ponderosa Pine Woodland and Savanna - Xeric	149	Ponderosa Pine-3	Conifer	104	Tree Cover >= 40 and < 50%	7	Cascade Mountain Range	1100	Northern Rocky Mountain Ponderosa Pine Woodland and Savanna	4	Conifer	Ponderosa Pine Forest, Woodland and Savanna	SAF 237: Interior Ponderosa Pine	Tree-dominated	Open tree canopy	100 <= CH < 250	Tr Northern Rocky Mountain Ponderosa Pine Woodland and Savanna	Tree	Evergreen open tree canopy	40 <= CC < 50	No	Conifer
KBOFUELRUPPERKLAMATHCFR2_06	2704.47	207.865	1881.58	12.415	11.2528	517.83	29.28	10.6125	45	175	60	10	1525	0.801222		m	NW	8	8 <= CBD < 9	Succession Class C	0	No Disturbance	NA	Upland Forest	10280	Mediterranean California Mesic Mixed Conifer Forest and Woodland	117	Douglas Fir-White Fir-Sugar Pine-1	Conifer	104	Tree Cover >= 40 and < 50%	7	Cascade Mountain Range	1000	Mediterranean California Mesic Mixed Conifer Forest and Woodland	5	Conifer	Douglas-fir-Grand Fir-White Fir Forest and Woodland	SAF 211: White Fir	Tree-dominated	Closed tree canopy	100 <= CH < 250	Tr Mediterranean California Mesic Mixed Conifer Forest and Woodland	Tree	Evergreen closed tree canopy	40 <= CC < 50	No	Conifer
KBOFUELRUPPERKLAMATHCFR3_10	1300.07	206.593	2857.24	14.6889	11.6066	569.56	28.82	10.485	35	175	53	2	1500	0.756245		m	NW	6	6 <= CBD < 7	Succession Class B	0	No Disturbance	NA	Upland Woodland	10531	Northern Rocky Mountain Ponderosa Pine Woodland and Savanna - Mesic	150	Ponderosa Pine-1	Conifer	103	Tree Cover >= 30 and < 40%	7	Cascade Mountain Range	1100	Northern Rocky Mountain Ponderosa Pine Woodland and Savanna	4	Conifer	Ponderosa Pine Forest, Woodland and Savanna	SAF 237: Interior Ponderosa Pine	Tree-dominated	Open tree canopy	100 <= CH < 250	Tr Northern Rocky Mountain Ponderosa Pine Woodland and Savanna	Tree	Evergreen open tree canopy	30 <= CC < 40	No	Conifer
KBOFUELRUPPERKLAMATHCFR4_08	1089.11	204.149	434.81	14.6014	9.85592	514.24	29.89	11.47	45	175	57	7	1355	0.837318		n	SW	8	8 <= CBD < 9	Succession Class B	0	No Disturbance	NA	Upland Woodland	10532	Northern Rocky Mountain Ponderosa Pine Woodland and Savanna - Xeric	149	Ponderosa Pine-3	Conifer	104	Tree Cover >= 40 and < 50%	7	Cascade Mountain Range	1100	Northern Rocky Mountain Ponderosa Pine Woodland and Savanna	4	Conifer	Ponderosa Pine Forest, Woodland and Savanna	SAF 237: Interior Ponderosa Pine	Tree-dominated	Open tree canopy	100 <= CH < 250	Tr Northern Rocky Mountain Ponderosa Pine Woodland and Savanna	Tree	Evergreen open tree canopy	40 <= CC < 50	No	Conifer
KBOFUELRUPPERKLAMATHCFR4_12	860.823	204.458	1423.5	13.8394	9.8147	464.17	29.73	11.155	45	175	56	14	1331	0.63423		m	E	8	8 <= CBD < 9	Succession Class B	0	No Disturbance	NA	Upland Woodland	10532	Northern Rocky Mountain Ponderosa Pine Woodland and Savanna - Xeric	149	Ponderosa Pine-3	Conifer	104	Tree Cover >= 40 and < 50%	7	Cascade Mountain Range	1100	Northern Rocky Mountain Ponderosa Pine Woodland and Savanna	4	Conifer	Ponderosa Pine Forest, Woodland and Savanna	SAF 237: Interior Ponderosa Pine	Tree-dominated	Open tree canopy	100 <= CH < 250	Tr Northern Rocky Mountain Ponderosa Pine Woodland and Savanna	Tree	Evergreen open tree canopy	40 <= CC < 50	No	Conifer
KBOFUELRUPPERKLAMATHCFR5_11	2340.25	202.955	781.394	13.1117	8.42903	460.99	29.57	11.0175	45	175	59	9	1346	0.77578		m	NW	8	8 <= CBD < 9	Succession Class B	0	No Disturbance	NA	Upland Forest	10531	Northern Rocky Mountain Ponderosa Pine Woodland and Savanna - Mesic	150	Ponderosa Pine-1	Conifer	104	Tree Cover >= 40 and < 50%	7	Cascade Mountain Range	1000	Mediterranean California Dry-Mesic Mixed Conifer Forest and Woodland	5	Conifer	Ponderosa Pine Forest, Woodland and Savanna	SAF 237: Interior Ponderosa Pine	Tree-dominated	Open tree canopy	100 <= CH < 250	Tr Northern Rocky Mountain Ponderosa Pine Woodland and Savanna	Tree	Evergreen open tree canopy	40 <= CC < 50	No	Conifer
KBOFUELRUPPERKLAMATHDEVA_01	2803.26	252.996	0	62.2496	62.2141	441.36	29.66	11.9625	0	0	23	0	1493	0.765394		ah	S	0	Non-Forested	Succession Class C	0	No Disturbance	NA	Wetland Herb	11540	Inter-Mountain Basins Montane Riparian Systems	259	Black Cottonwood-Narrowleaf Willow-3	Riparian	101	Tree Cover >= 10 and < 20%	7	Cascade Mountain Range	1200	Inter-Mountain Basins Montane Riparian Systems	9	Conifer	Juniper Woodland and Savanna	SAF 238: Western Juniper	Tree-dominated	Open tree canopy	Non-Forested	Tr Juniperus occidentalis Woodland Alliance	Tree	Evergreen open tree canopy	Non-Forested	No	Shrubland
KBOFUELRUPPERKLAMATHDRYP_09	389.071	252.551	374.109	60.4706	60.4379	442.67	29.66	11.9575	0	0	30	1	1486	0.777427		ah	W	0	Non-Forested	Succession Class B	0	No Disturbance	NA	Upland Shrub	11260	Inter-Mountain Basins Montane Sagebrush Steppe	222	Mountain Sagebrush-Bluebunch Wheatgrass-Idaho Fes*	Shrubland	113	Shrub Cover >= 30 and < 40%	7	Cascade Mountain Range	1100	Inter-Mountain Basins Montane Sagebrush Steppe	3	Shrubland	Big Sagebrush Shrubland and Steppe	SRM 402: Mountain Big Sagebrush	Shrub-dominated	Herbaceous - shrub-steppe	Non-Forested	Sh Inter-Mountain Basins Montane Sagebrush Steppe	Shrub	Perennial graminoid steppe	Non-Forested	No	Shrubland
KBOFUELRUPPERKLAMATHFOMI_05	1635.53	176.938	895.363	1.53118	0.192639	716.28	28.51	11.135	45	175	67	8	1298	0.834641		o	S	8	8 <= CBD < 9	Succession Class C	0	No Disturbance	NA	Upland Forest	10280	Mediterranean California Mesic Mixed Conifer Forest and Woodland	117	Douglas Fir-White Fir-Sugar Pine-1	Conifer	104	Tree Cover >= 40 and < 50%	7	Cascade Mountain Range	1000	Mediterranean California Mesic Mixed Conifer Forest and Woodland	5	Conifer	Douglas-fir-Grand Fir-White Fir Forest and Woodland	SAF 211: White Fir	Tree-dominated	Closed tree canopy	100 <= CH < 250	Tr Mediterranean California Mesic Mixed Conifer Forest and Woodland	Tree	Evergreen closed tree canopy	40 <= CC < 50	No	Mixed
KBOFUELRUPPERKLAMATHHADN_02	2625.45	164.9	280.479	8.06219	3.25591	509.7	28.99	14.2275	35	175	46	6	1061	0.796183		e	SE	1	1 <= CBD < 2	Succession Class C	0	No Disturbance	NA	Upland Woodland	10270	Mediterranean California Dry-Mesic Mixed Conifer Forest and Woodland	116	Ponderosa Pine-Incense Cedar-1	Conifer	103	Tree Cover >= 30 and < 40%	7	Cascade Mountain Range	1000	Mediterranean California Dry-Mesic Mixed Conifer Forest and Woodland	4	Conifer	Conifer-Oak Forest and Woodland	SAF 246: California Black Oak	Tree-dominated	Open tree canopy	100 <= CH < 250	Tr Mediterranean California Lower Montane Conifer Forest and Woodland	Tree	Evergreen open tree canopy	30 <= CC < 40	No	Mixed
KBOFUELRUPPERKLAMATHHARP_01	2162.55	228.985	591.133	40.3881	39.9774	322.67	29.88	12.215	0	0	27	5	1361	0.820407		z	W	0	Non-Forested	Succession Class B	0	No Disturbance	NA	Upland Woodland	10170	Columbia Plateau Western Juniper Woodland and Savanna	108	Western Juniper-Low Sage-3	Conifer	113	Shrub Cover >= 30 and < 40%	7	Cascade Mountain Range	1000	Columbia Plateau Western Juniper Woodland and Savanna	4	Shrubland	Big Sagebrush Shrubland and Steppe	SRM 403: Wyoming Big Sagebrush	Shrub-dominated	Shrubland	Non-Forested	Sh Inter-Mountain Basins Big Sagebrush Shrubland	Shrub	Evergreen shrubland	Non-Forested	No	Mixed
KBOFUELRUPPERKLAMATHHARP_06	3100.6	228.717	1204.3	40.7102	40.2403	329.6	29.84	12.2125	0	0	26	4	1366	0.814429		u	W	0	Non-Forested	Succession Class B	0	No Disturbance	NA	Upland Woodland	10170	Columbia Plateau Western Juniper Woodland and Savanna	108	Western Juniper-Low Sage-3	Conifer	112	Shrub Cover >= 20 and < 30%	7	Cascade Mountain Range	1000	Columbia Plateau Western Juniper Woodland and Savanna	4	Shrubland	Big Sagebrush Shrubland and Steppe	SRM 403: Wyoming Big Sagebrush	Shrub-dominated	Shrubland	Non-Forested	Sh Inter-Mountain Basins Big Sagebrush Shrubland	Shrub	Evergreen shrubland	Non-Forested	No	Shrubland
KBOFUELRUPPERKLAMATHHARR_06	951.058	180.744	957.404	0.134164	0.131962	720.73	28.54	11.1025	55	175	80	5	1302	0.821716		m	S	11	11 <= CBD < 12	Succession Class B	0	No Disturbance	NA	Upland Forest	10280	Mediterranean California Mesic Mixed Conifer Forest and Woodland	117	Douglas Fir-White Fir-Sugar Pine-1	Conifer	105	Tree Cover >= 50 and < 60%	7	Cascade Mountain Range	1000	Mediterranean California Mesic Mixed Conifer Forest and Woodland	5	Conifer	Douglas-fir-Grand Fir-White Fir Forest and Woodland	SAF 211: White Fir	Tree-dominated	Closed tree canopy	100 <= CH < 250	Tr Mediterranean California Mesic Mixed Conifer Forest and Woodland	Tree	Evergreen closed tree canopy	50 <= CC < 60	No	Conifer
KBOFUELRUPPERKLAMATHJSPR_02	491.246	259.516	3.17	67.4244	67.3919	466.19	29.67	11.8275	0	0	34	0	1500	0.7556		ah	Flat	0	Non-Forested	Succession Class D	0	No Disturbance	NA	Wetland Shrub	11250	Inter-Mountain Basins Big Sagebrush Steppe	220	Wyoming Big Sage-Wheatgrass-3	Shrubland	113	Shrub Cover >= 30 and < 40%	7	Cascade Mountain Range	1000	Columbia Plateau Western Juniper Woodland and Savanna	8	Shrubland	Low Sagebrush Shrubland and Steppe	SRM 406: Low Sagebrush	Shrub-dominated	Herbaceous - shrub-steppe	Non-Forested	Sh Columbia Plateau Low Sagebrush Steppe	Shrub	Perennial graminoid steppe	Non-Forested	No	Shrubland
KBOFUELRUPPERKLAMATHJSPR_12	885.806	259.265	197.842	67.0557	67.0236	474.58	29.76	11.8125	0	0	34	1	1493	0.763111		ah	NW	0	Non-Forested	Succession Class B	0	No Disturbance	NA	Upland Shrub	11260	Inter-Mountain Basins Montane Sagebrush Steppe	222	Mountain Sagebrush-Bluebunch Wheatgrass-Idaho Fes*	Shrubland	113	Shrub Cover >= 30 and < 40%	7	Cascade Mountain Range	1000	Columbia Plateau Western Juniper Woodland and Savanna	3	Shrubland	Low Sagebrush Shrubland and Steppe	SRM 406: Low Sagebrush	Shrub-dominated	Herbaceous - shrub-steppe	Non-Forested	Sh Columbia Plateau Low Sagebrush Steppe	Shrub	Perennial graminoid steppe	Non-Forested	No	Shrubland
KBOFUELRUPPERKLAMATHKIGO_01	4401.53	259.714	666.277	75.0375	74.6869	446.81	29.36	11.6925	0	0	23	2	1504	0.775388		ah	SE	0	Non-Forested	Succession Class B	0	No Disturbance	NA	Upland Shrub	10170	Columbia Plateau Western Juniper Woodland and Savanna	108	Western Juniper-Low Sage-3	Conifer	112	Shrub Cover >= 20 and < 30%	7	Cascade Mountain Range	1000	Columbia Plateau Western Juniper Woodland and Savanna	3	Shrubland	Big Sagebrush Shrubland and Steppe	SRM 403: Wyoming Big Sagebrush	Shrub-dominated	Shrubland	Non-Forested	Sh Inter-Mountain Basins Big Sagebrush Shrubland	Shrub	Evergreen shrubland	Non-Forested	No	Shrubland
KBOFUELRUPPERKLAMATHKIGO_12	3442.13	259.047	666.349	74.8266	74.4451	430.86	29.42	11.77	0	0	23	2	1481	0.790853		ag	S	0	Non-Forested	Succession Class B	0	No Disturbance	NA	Upland Shrub	11260	Inter-Mountain Basins Montane Sagebrush Steppe	222	Mountain Sagebrush-Bluebunch Wheatgrass-Idaho Fes*	Shrubland	113	Shrub Cover >= 30 and < 40%	7	Cascade Mountain Range	1100	Inter-Mountain Basins Big Sagebrush Shrubland	3	Shrubland	Big Sagebrush Shrubland and Steppe	SRM 403: Wyoming Big Sagebrush	Shrub-dominated	Shrubland	Non-Forested	Sh Inter-Mountain Basins Big Sagebrush Shrubland	Shrub	Evergreen shrubland	Non-Forested	No	Shrubland
KBOFUELRUPPERKLAMATHKLRI_05	1423.27	173.144	685.579	14.0723	10.4305	523.7	29.64	13.0075	35	175	69	29	1186	0.739868		s	SE	6	6 <= CBD < 7	Succession Class C	0	No Disturbance	NA	Upland Woodland	10270	Mediterranean California Dry-Mesic Mixed Conifer Forest and Woodland	116	Ponderosa Pine-Incense Cedar-1	Conifer	103	Tree Cover >= 30 and < 40%	7	Cascade Mountain Range	1000	Mediterranean California Dry-Mesic Mixed Conifer Forest and Woodland	4	Conifer	Douglas-fir-Ponderosa Pine-Lodgepole Pine Forest and Woodland	SAF 243: Sierra Nevada Mixed Conifer	Tree-dominated	Open tree canopy	100 <= CH < 250	Tr Mediterranean California Dry-Mesic Mixed Conifer Forest and Woodland	Tree	Evergreen open tree canopy	30 <= CC < 40	No	Mixed
KBOFUELRUPPERKLAMATHKR10_03	1667.32	173.67	610.987	14.0826	10.7404	511.47	30.09	13.9125	25	175	71	3	1066	0.803168		m	S	1	1 <= CBD < 2	Succession Class C	0	No Disturbance	NA	Upland Woodland	10270	Mediterranean California Dry-Mesic Mixed Conifer Forest and Woodland	116	Ponderosa Pine-Incense Cedar-1	Conifer	102	Tree Cover >= 20 and < 30%	7	Cascade Mountain Range	1000	Mediterranean California Dry-Mesic Mixed Conifer Forest and Woodland	4	Conifer	Conifer-Oak Forest and Woodland	SAF 246: California Black Oak	Tree-dominated	Open tree canopy	100 <= CH < 250	Tr Mediterranean California Lower Montane Conifer Forest and Woodland	Tree	Evergreen open tree canopy	20 <= CC < 30	No	Conifer
KBOFUELRUPPERKLAMATHKR10_11	1618.81	173.774	458.022	13.668	10.6119	520.19	28.43	13.5575	25	175	63	30	1125	0.798232		r	SE	4	4 <= CBD < 5	Succession Class C	0	No Disturbance	NA	Upland Woodland	10310	California Montane Jeffrey Pine(-Ponderosa Pine) Woodland	120	Jeffrey Pine-1	Conifer	102	Tree Cover >= 20 and < 30%	7	Cascade Mountain Range	1000	Mediterranean California Mesic Mixed Conifer Forest and Woodland	4	Conifer	Ponderosa Pine Forest, Woodland and Savanna	SAF 237: Interior Ponderosa Pine	Tree-dominated	Open tree canopy	100 <= CH < 250	Tr Northern Rocky Mountain Ponderosa Pine Woodland and Savanna	Tree	Evergreen open tree canopy	20 <= CC < 30	No	Conifer
KBOFUELRUPPERKLAMATHKR11_01	2536.95	174.583	725.269	13.4462	11.0508	530.59	30.06	13.5525	0	0	68	31	1124	1.06334		o	S	0	Non-Forested	Succession Class D	0	No Disturbance	NA	Upland Shrub	10280	Mediterranean California Mesic Mixed Conifer Forest and Woodland	117	Douglas Fir-White Fir-Sugar Pine-1	Conifer	113	Shrub Cover >= 30 and < 40%	7	Cascade Mountain Range	1000	Mediterranean California Mesic Mixed Conifer Forest and Woodland	3	Shrubland	Chaparral	SRM 206: Chamise Chaparral	Shrub-dominated	Shrubland	Non-Forested	Sh Northern and Central California Dry-Mesic Chaparral	Shrub	Evergreen shrubland	Non-Forested	No	Mixed
KBOFUELRUPPERKLAMATHKR11_09	2105.87	174.017	875.353	12.886	10.4583	541.82	29.12	12.36	25	175	68	19	1303	0.617241		n	E	4	4 <= CBD < 5	Succession Class C	0	No Disturbance	NA	Upland Forest	10280	Mediterranean California Mesic Mixed Conifer Forest and Woodland	117	Douglas Fir-White Fir-Sugar Pine-1	Conifer	102	Tree Cover >= 20 and < 30%	7	Cascade Mountain Range	1000	Mediterranean California Mesic Mixed Conifer Forest and Woodland	5	Conifer	Douglas-fir-Grand Fir-White Fir Forest and Woodland	SAF 211: White Fir	Tree-dominated	Closed tree canopy	100 <= CH < 250	Tr Mediterranean California Mesic Mixed Conifer Forest and Woodland	Tree	Evergreen closed tree canopy	20 <= CC < 30	No	Conifer
KBOFUELRUPPERKLAMATHKR12_10	4341.53	175.532	2662.85	12.7016	9.13025	537.96	29.42	12.6025	0	0	73	36	1182	0.816195		m	SE	0	Non-Forested	Succession Class D	0	No Disturbance	NA	Upland Shrub	10280	Mediterranean California Mesic Mixed Conifer Forest and Woodland	117	Douglas Fir-White Fir-Sugar Pine-1	Conifer	113	Shrub Cover >= 30 and < 40%	7	Cascade Mountain Range	1000	Mediterranean California Mesic Mixed Conifer Forest and Woodland	3	Shrubland	Chaparral	SRM 206: Chamise Chaparral	Shrub-dominated	Shrubland	Non-Forested	Sh Northern and Central California Dry-Mesic Chaparral	Shrub	Evergreen shrubland	Non-Forested	No	Conifer
KBOFUELRUPPERKLAMATHKRC2_06	2332.09	166.212	142.125	9.47378	4.1219	519.21	29.03	13.5675	25	175	43	14	1122	0.912859		z	S	4	4 <= CBD < 5	Succession Class C	0	No Disturbance	NA	Upland Woodland	10270	Mediterranean California Dry-Mesic Mixed Conifer Forest and Woodland	116	Ponderosa Pine-Incense Cedar-1	Conifer	102	Tree Cover >= 20 and < 30%	7	Cascade Mountain Range	1000	Mediterranean California Dry-Mesic Mixed Conifer Forest and Woodland	4	Conifer	Douglas-fir-Ponderosa Pine-Lodgepole Pine Forest and Woodland	SAF 243: Sierra Nevada Mixed Conifer	Tree-dominated	Open tree canopy	100 <= CH < 250	Tr Mediterranean California Dry-Mesic Mixed Conifer Forest and Woodland	Tree	Evergreen open tree canopy	20 <= CC < 30	No	Mixed
KBOFUELRUPPERKLAMATHKRC2_07	2380.7	165.932	197.253	9.19494	3.90961	519.21	29.03	13.5675	25	175	53	26	1117	0.995496		s	S	4	4 <= CBD < 5	Succession Class C	0	No Disturbance	NA	Upland Woodland	10270	Mediterranean California Dry-Mesic Mixed Conifer Forest and Woodland	116	Ponderosa Pine-Incense Cedar-1	Conifer	102	Tree Cover >= 20 and < 30%	7	Cascade Mountain Range	1000	Mediterranean California Dry-Mesic Mixed Conifer Forest and Woodland	4	Conifer	Douglas-fir-Ponderosa Pine-Lodgepole Pine Forest and Woodland	SAF 243: Sierra Nevada Mixed Conifer	Tree-dominated	Open tree canopy	100 <= CH < 250	Tr Mediterranean California Dry-Mesic Mixed Conifer Forest and Woodland	Tree	Evergreen open tree canopy	20 <= CC < 30	No	Mixed
KBOFUELRUPPERKLAMATHKRC2_09	2533.63	165.1	476.088	8.15305	3.53247	509.7	28.99	14.2275	25	175	46	13	1009	0.741423		w	SE	4	4 <= CBD < 5	Succession Class C	0	No Disturbance	NA	Upland Woodland	10270	Mediterranean California Dry-Mesic Mixed Conifer Forest and Woodland	116	Ponderosa Pine-Incense Cedar-1	Conifer	102	Tree Cover >= 20 and < 30%	7	Cascade Mountain Range	1000	Mediterranean California Dry-Mesic Mixed Conifer Forest and Woodland	4	Conifer	Douglas-fir-Ponderosa Pine-Lodgepole Pine Forest and Woodland	SAF 243: Sierra Nevada Mixed Conifer	Tree-dominated	Open tree canopy	100 <= CH < 250	Tr Mediterranean California Dry-Mesic Mixed Conifer Forest and Woodland	Tree	Evergreen open tree canopy	20 <= CC < 30	No	Mixed
KBOFUELRUPPERKLAMATHKRC3_06	1447.06	166.378	604.539	9.18397	4.67921	503.96	29.67	14.14	0	0	53	8	1017	0.866116		r	S	0	Non-Forested	Succession Class A	0	No Disturbance	NA	Upland Shrub	10300	Mediterranean California Lower Montane Black Oak-Conifer Forest and Woodland	119	Ponderosa Pine-California Black Oak-1	Conifer	114	Shrub Cover >= 40 and < 50%	7	Cascade Mountain Range	1000	Mediterranean California Dry-Mesic Mixed Conifer Forest and Woodland	3	Shrubland	Chaparral	SRM 206: Chamise Chaparral	Shrub-dominated	Shrubland	Non-Forested	Sh Northern and Central California Dry-Mesic Chaparral	Shrub	Evergreen shrubland	Non-Forested	No	Conifer
KBOFUELRUPPERKLAMATHKRC3_12	686.806	166.645	687.245	9.13622	5.36215	500.86	30.36	14.47	45	175	51	10	953	0.839101		s	NW	8	8 <= CBD < 9	Succession Class B	0	No Disturbance	NA	Upland Woodland	10600	East Cascades Oak-Ponderosa Pine Forest and Woodland	162	Ponderosa Pine-Oregon White Oak-1	Conifer	104	Tree Cover >= 40 and < 50%	7	Cascade Mountain Range	1000	Mediterranean California Dry-Mesic Mixed Conifer Forest and Woodland	4	Conifer	Conifer-Oak Forest and Woodland	SAF 237: Interior Ponderosa Pine	Tree-dominated	Open tree canopy	100 <= CH < 250	Tr East Cascades Ponderosa Pine Forest and Woodland	Tree	Evergreen open tree canopy	40 <= CC < 50	No	Mixed
KBOFUELRUPPERKLAMATHKRC6_01	2070.42	169.444	323.031	12.1263	7.29143	519.09	29.89	13.6375	0	0	49	29	1155	0.99723		n	SW	0	Non-Forested	Succession Class A	0	No Disturbance	NA	Upland Shrub	10270	Mediterranean California Dry-Mesic Mixed Conifer Forest and Woodland	116	Ponderosa Pine-Incense Cedar-1	Conifer	114	Shrub Cover >= 40 and < 50%	7	Cascade Mountain Range	1000	Mediterranean California Dry-Mesic Mixed Conifer Forest and Woodland	3	Shrubland	Chaparral	SRM 206: Chamise Chaparral	Shrub-dominated	Shrubland	Non-Forested	Sh Northern and Central California Dry-Mesic Chaparral	Shrub	Evergreen shrubland	Non-Forested	No	Conifer
KBOFUELRUPPERKLAMATHKRC6_12	1014.05	168.756	860.056	11.2094	7.03448	500.71	30.17	14.2075	35	175	53	10	960	0.865353		s	S	6	6 <= CBD < 7	Succession Class C	0	No Disturbance	NA	Upland Woodland	10270	Mediterranean California Dry-Mesic Mixed Conifer Forest and Woodland	116	Ponderosa Pine-Incense Cedar-1	Conifer	103	Tree Cover >= 30 and < 40%	7	Cascade Mountain Range	1000	Mediterranean California Dry-Mesic Mixed Conifer Forest and Woodland	4	Conifer	Douglas-fir-Ponderosa Pine-Lodgepole Pine Forest and Woodland	SAF 243: Sierra Nevada Mixed Conifer	Tree-dominated	Open tree canopy	100 <= CH < 250	Tr Mediterranean California Dry-Mesic Mixed Conifer Forest and Woodland	Tree	Evergreen open tree canopy	30 <= CC < 40	No	Mixed
KBOFUELRUPPERKLAMATHKRC8_04	601.724	171.704	474.387	13.9861	9.81268	499.95	29.96	13.875	25	175	60	0	1001	0.76162		s	S	4	4 <= CBD < 5	Succession Class C	0	No Disturbance	NA	Upland Woodland	10270	Mediterranean California Dry-Mesic Mixed Conifer Forest and Woodland	116	Ponderosa Pine-Incense Cedar-1	Conifer	102	Tree Cover >= 20 and < 30%	7	Cascade Mountain Range	1000	Mediterranean California Dry-Mesic Mixed Conifer Forest and Woodland	4	Conifer	Ponderosa Pine Forest, Woodland and Savanna	SAF 237: Interior Ponderosa Pine	Tree-dominated	Open tree canopy	100 <= CH < 250	Tr Northern Rocky Mountain Ponderosa Pine Woodland and Savanna	Tree	Evergreen open tree canopy	20 <= CC < 30	No	Mixed
KBOFUELRUPPERKLAMATHKRC8_05	1301.6	172.138	527.995	14.5231	9.97149	522.15	29.37	12.54	25	175	54	29	1179	1.045		s	SW	4	4 <= CBD < 5	Succession Class C	0	No Disturbance	NA	Upland Woodland	10270	Mediterranean California Dry-Mesic Mixed Conifer Forest and Woodland	116	Ponderosa Pine-Incense Cedar-1	Conifer	102	Tree Cover >= 20 and < 30%	7	Cascade Mountain Range	1000	Mediterranean California Dry-Mesic Mixed Conifer Forest and Woodland	4	Conifer	Conifer-Oak Forest and Woodland	SAF 237: Interior Ponderosa Pine	Tree-dominated	Open tree canopy	100 <= CH < 250	Tr East Cascades Ponderosa Pine Forest and Woodland	Tree	Evergreen open tree canopy	20 <= CC < 30	No	Mixed
KBOFUELRUPPERKLAMATHKRC8_11	916.335	171.568	878.967	13.9555	9.46651	508.74	29.81	13.495	45	175	54	12	1109	0.865923		n	SE	8	8 <= CBD < 9	Succession Class C	0	No Disturbance	NA	Upland Woodland	10270	Mediterranean California Dry-Mesic Mixed Conifer Forest and Woodland	116	Ponderosa Pine-Incense Cedar-1	Conifer	104	Tree Cover >= 40 and < 50%	7	Cascade Mountain Range	1000	Mediterranean California Dry-Mesic Mixed Conifer Forest and Woodland	4	Conifer	Douglas-fir-Ponderosa Pine-Lodgepole Pine Forest and Woodland	SAF 243: Sierra Nevada Mixed Conifer	Tree-dominated	Open tree canopy	100 <= CH < 250	Tr Mediterranean California Dry-Mesic Mixed Conifer Forest and Woodland	Tree	Evergreen open tree canopy	40 <= CC < 50	No	Conifer
KBOFUELRUPPERKLAMATHLORE_11	2012.54	242.234	1480.92	53.0956	52.9069	326.16	30.2	12.23	0	0	51	3	1318	0.77517		u	SE	0	Non-Forested	Succession Class B	0	No Disturbance	NA	Upland Woodland	11250	Inter-Mountain Basins Big Sagebrush Steppe	220	Wyoming Big Sage-Wheatgrass-3	Shrubland	112	Shrub Cover >= 20 and < 30%	7	Cascade Mountain Range	1200	Inter-Mountain Basins Greasewood Flat	4	Shrubland	Greasewood Shrubland	SRM 501: Saltbush-Greasewood	Shrub-dominated	Shrubland	Non-Forested	Sh Inter-Mountain Basins Greasewood Flat	Shrub	Evergreen shrubland	Non-Forested	No	Shrubland
KBOFUELRUPPERKLAMATHLORI_02	2395.65	242.615	1842.35	52.4678	52.3673	358.38	29.75	12.29	0	0	33	19	1401	0.983384		ag	W	0	Non-Forested	Succession Class E	0	No Disturbance	NA	Upland Woodland	10170	Columbia Plateau Western Juniper Woodland and Savanna	108	Western Juniper-Low Sage-3	Conifer	102	Tree Cover >= 20 and < 30%	7	Cascade Mountain Range	1000	Columbia Plateau Western Juniper Woodland and Savanna	4	Conifer	Juniper Woodland and Savanna	SAF 238: Western Juniper	Tree-dominated	Open tree canopy	Non-Forested	Tr Juniperus occidentalis Woodland Alliance	Tree	Evergreen open tree canopy	Non-Forested	No	Shrubland
KBOFUELRUPPERKLAMATHMASP_05	3258.15	184.961	41.93	0.284605	0.040917	785.88	28.69	11.4375	55	175	70	3	1263	0.723675		y	E	11	11 <= CBD < 12	Succession Class B	0	No Disturbance	NA	Wetland Shrub	11582	North Pacific Montane Riparian Woodland and Shrubland - Dry	258	White Alder-Devils Club-5	Riparian	105	Tree Cover >= 50 and < 60%	7	Cascade Mountain Range	1200	North Pacific Montane Riparian Woodland and Shrubland	8	Riparian	Western Riparian Woodland and Shrubland	SAF 222: Black Cottonwood-Willow	Tree-dominated	Open tree canopy	100 <= CH < 250	Tr North Pacific Montane Riparian Woodland and Shrubland	Tree	Mixed evergreen-deciduous open tree canopy	50 <= CC < 60	No	Conifer
KBOFUELRUPPERKLAMATHMLOC_08	582.255	179.453	583.436	0.721249	0.04775	659.87	28.46	11.35	55	375	73	7	1292	0.659939		m	NE	9	9 <= CBD < 10	Succession Class E	0	No Disturbance	NA	Upland Forest	10280	Mediterranean California Mesic Mixed Conifer Forest and Woodland	117	Douglas Fir-White Fir-Sugar Pine-1	Conifer	105	Tree Cover >= 50 and < 60%	7	Cascade Mountain Range	1000	Mediterranean California Mesic Mixed Conifer Forest and Woodland	5	Conifer	Douglas-fir-Grand Fir-White Fir Forest and Woodland	SAF 211: White Fir	Tree-dominated	Closed tree canopy	250 <= CH < 500	Tr Mediterranean California Mesic Mixed Conifer Forest and Woodland	Tree	Evergreen closed tree canopy	50 <= CC < 60	No	Conifer
KBOFUELRUPPERKLAMATHMLOC_13	513.788	179.297	970.558	1.42144	0.312308	727.95	28.48	10.6775	35	175	77	10	1403	0.872775		m	W	6	6 <= CBD < 7	Succession Class C	311	Mechanical Remove	Low	Upland Forest	10280	Mediterranean California Mesic Mixed Conifer Forest and Woodland	117	Douglas Fir-White Fir-Sugar Pine-1	Conifer	103	Tree Cover >= 30 and < 40%	7	Cascade Mountain Range	1000	Mediterranean California Mesic Mixed Conifer Forest and Woodland	5	Conifer	Ponderosa Pine Forest, Woodland and Savanna	SAF 237: Interior Ponderosa Pine	Tree-dominated	Open tree canopy	100 <= CH < 250	Tr Northern Rocky Mountain Ponderosa Pine Woodland and Savanna	Tree	Evergreen open tree canopy	30 <= CC < 40	No	Conifer
KBOFUELRUPPERKLAMATHNMN1_05	5552.95	211.427	1845.32	14.8891	14.4448	513.67	29.66	10.8625	25	175	54	0	1396	0.767624		n	W	4	4 <= CBD < 5	Succession Class C	212	Mechanical Add	Low	Upland Woodland	11670	Rocky Mountain Poor-Site Lodgepole Pine Forest	266	Lodgepole Pine-Kinnikinnick-4	Conifer	102	Tree Cover >= 20 and < 30%	7	Cascade Mountain Range	1100	Northern Rocky Mountain Ponderosa Pine Woodland and Savanna	4	Conifer	Ponderosa Pine Forest, Woodland and Savanna	SAF 237: Interior Ponderosa Pine	Tree-dominated	Open tree canopy	100 <= CH < 250	Tr Northern Rocky Mountain Ponderosa Pine Woodland and Savanna	Tree	Evergreen open tree canopy	20 <= CC < 30	No	Conifer
KBOFUELRUPPERKLAMATHNMN1_14	5866.94	212.062	2150.56	15.2306	14.8833	521.22	29.73	10.7525	35	175	65	1	1404	0.779573		i	S	6	6 <= CBD < 7	Succession Class C	0	No Disturbance	NA	Upland Woodland	11670	Rocky Mountain Poor-Site Lodgepole Pine Forest	266	Lodgepole Pine-Kinnikinnick-4	Conifer	103	Tree Cover >= 30 and < 40%	7	Cascade Mountain Range	1100	Northern Rocky Mountain Ponderosa Pine Woodland and Savanna	4	Conifer	Ponderosa Pine Forest, Woodland and Savanna	SAF 237: Interior Ponderosa Pine	Tree-dominated	Open tree canopy	100 <= CH < 250	Tr Northern Rocky Mountain Ponderosa Pine Woodland and Savanna	Tree	Evergreen open tree canopy	30 <= CC < 40	No	Conifer
KBOFUELRUPPERKLAMATHNMN2_14	7640.07	216.512	376.781	18.5384	18.4071	545.77	29.83	10.7925	35	175	49	3	1442	0.803168		n	W	6	6 <= CBD < 7	Succession Class B	212	Mechanical Add	Low	Upland Woodland	10531	Northern Rocky Mountain Ponderosa Pine Woodland and Savanna - Mesic	150	Ponderosa Pine-1	Conifer	103	Tree Cover >= 30 and < 40%	7	Cascade Mountain Range	1000	Mediterranean California Dry-Mesic Mixed Conifer Forest and Woodland	4	Conifer	Ponderosa Pine Forest, Woodland and Savanna	SAF 237: Interior Ponderosa Pine	Tree-dominated	Open tree canopy	100 <= CH < 250	Tr Northern Rocky Mountain Ponderosa Pine Woodland and Savanna	Tree	Evergreen open tree canopy	30 <= CC < 40	No	Conifer
KBOFUELRUPPERKLAMATHNMN3_07	6760.81	218.469	1607.35	20.8046	20.6471	594.17	29.81	10.71	45	175	48	4	1453	0.810731		m	W	8	8 <= CBD < 9	Succession Class B	212	Mechanical Add	Low	Upland Woodland	10531	Northern Rocky Mountain Ponderosa Pine Woodland and Savanna - Mesic	150	Ponderosa Pine-1	Conifer	104	Tree Cover >= 40 and < 50%	7	Cascade Mountain Range	1000	Mediterranean California Dry-Mesic Mixed Conifer Forest and Woodland	4	Conifer	Ponderosa Pine Forest, Woodland and Savanna	SAF 237: Interior Ponderosa Pine	Tree-dominated	Open tree canopy	100 <= CH < 250	Tr Northern Rocky Mountain Ponderosa Pine Woodland and Savanna	Tree	Evergreen open tree canopy	40 <= CC < 50	No	Conifer
KBOFUELRUPPERKLAMATHNMN3_15	6765.58	218.942	2106.88	21.2966	21.1413	608.05	29.67	10.5375	35	175	53	6	1487	0.829948		m	W	6	6 <= CBD < 7	Succession Class B	212	Mechanical Add	Low	Upland Woodland	10531	Northern Rocky Mountain Ponderosa Pine Woodland and Savanna - Mesic	150	Ponderosa Pine-1	Conifer	103	Tree Cover >= 30 and < 40%	7	Cascade Mountain Range	1000	Mediterranean California Dry-Mesic Mixed Conifer Forest and Woodland	4	Conifer	Ponderosa Pine Forest, Woodland and Savanna	SAF 237: Interior Ponderosa Pine	Tree-dominated	Open tree canopy	100 <= CH < 250	Tr Northern Rocky Mountain Ponderosa Pine Woodland and Savanna	Tree	Evergreen open tree canopy	30 <= CC < 40	No	Conifer
KBOFUELRUPPERKLAMATHNMN4_11	5776.44	216.976	992.196	18.1122	17.7288	542.2	30.07	10.975	35	175	56	7	1397	0.836743		n	W	6	6 <= CBD < 7	Succession Class B	212	Mechanical Add	Low	Upland Woodland	10531	Northern Rocky Mountain Ponderosa Pine Woodland and Savanna - Mesic	150	Ponderosa Pine-1	Conifer	103	Tree Cover >= 30 and < 40%	7	Cascade Mountain Range	1000	Mediterranean California Dry-Mesic Mixed Conifer Forest and Woodland	4	Conifer	Ponderosa Pine Forest, Woodland and Savanna	SAF 237: Interior Ponderosa Pine	Tree-dominated	Open tree canopy	100 <= CH < 250	Tr Northern Rocky Mountain Ponderosa Pine Woodland and Savanna	Tree	Evergreen open tree canopy	30 <= CC < 40	No	Conifer
KBOFUELRUPPERKLAMATHNMN4_16	4749.31	217.411	2082.14	18.2941	17.6931	553.74	30.07	10.925	45	175	56	6	1403	0.814909		m	NW	8	8 <= CBD < 9	Succession Class B	0	No Disturbance	NA	Upland Forest	10531	Northern Rocky Mountain Ponderosa Pine Woodland and Savanna - Mesic	150	Ponderosa Pine-1	Conifer	104	Tree Cover >= 40 and < 50%	7	Cascade Mountain Range	1000	Mediterranean California Dry-Mesic Mixed Conifer Forest and Woodland	5	Conifer	Ponderosa Pine Forest, Woodland and Savanna	SAF 237: Interior Ponderosa Pine	Tree-dominated	Open tree canopy	100 <= CH < 250	Tr Northern Rocky Mountain Ponderosa Pine Woodland and Savanna	Tree	Evergreen open tree canopy	40 <= CC < 50	No	Conifer
KBOFUELRUPPERKLAMATHNMN5_13	2956.31	218.633	3366.19	19.4184	17.395	660	30.13	10.3525	45	175	71	7	1476	0.8303		m	W	8	8 <= CBD < 9	Succession Class B	0	No Disturbance	NA	Upland Forest	10531	Northern Rocky Mountain Ponderosa Pine Woodland and Savanna - Mesic	150	Ponderosa Pine-1	Conifer	104	Tree Cover >= 40 and < 50%	7	Cascade Mountain Range	1000	Northern Rocky Mountain Dry-Mesic Montane Mixed Conifer Forest	5	Conifer	Douglas-fir-Grand Fir-White Fir Forest and Woodland	SAF 211: White Fir	Tree-dominated	Closed tree canopy	100 <= CH < 250	Tr Mediterranean California Mesic Mixed Conifer Forest and Woodland	Tree	Evergreen closed tree canopy	40 <= CC < 50	No	Conifer
KBOFUELRUPPERKLAMATHNMN5_15	2649.37	218.664	2866.56	19.5302	17.0425	660	30.13	10.3525	35	375	56	8	1463	0.867408		m	W	5	5 <= CBD < 6	Succession Class D	112	Fire	Low	Upland Forest	10531	Northern Rocky Mountain Ponderosa Pine Woodland and Savanna - Mesic	150	Ponderosa Pine-1	Conifer	103	Tree Cover >= 30 and < 40%	7	Cascade Mountain Range	1100	Northern Rocky Mountain Ponderosa Pine Woodland and Savanna	5	Conifer	Ponderosa Pine Forest, Woodland and Savanna	SAF 237: Interior Ponderosa Pine	Tree-dominated	Open tree canopy	250 <= CH < 500	Tr Northern Rocky Mountain Ponderosa Pine Woodland and Savanna	Tree	Evergreen open tree canopy	30 <= CC < 40	No	Conifer
KBOFUELRUPPERKLAMATHNOBR_02	2212.9	230.932	724.963	41.2737	40.995	321.43	29.98	12.2875	0	0	39	10	1338	0.869019		u	W	0	Non-Forested	Succession Class B	0	No Disturbance	NA	Upland Shrub	10170	Columbia Plateau Western Juniper Woodland and Savanna	108	Western Juniper-Low Sage-3	Conifer	112	Shrub Cover >= 20 and < 30%	7	Cascade Mountain Range	1000	Columbia Plateau Western Juniper Woodland and Savanna	3	Shrubland	Low Sagebrush Shrubland and Steppe	SRM 406: Low Sagebrush	Shrub-dominated	Herbaceous - shrub-steppe	Non-Forested	Sh Columbia Plateau Low Sagebrush Steppe	Shrub	Perennial graminoid steppe	Non-Forested	No	Shrubland
KBOFUELRUPPERKLAMATHNOBR_07	3089.16	231.609	23.563	42.1685	41.8776	331.87	30.09	12.1675	0	0	24	4	1339	0.733438		u	N	0	Non-Forested	Succession Class B	0	No Disturbance	NA	Upland Shrub	10170	Columbia Plateau Western Juniper Woodland and Savanna	108	Western Juniper-Low Sage-3	Conifer	111	Shrub Cover >= 10 and < 20%	7	Cascade Mountain Range	1000	Columbia Plateau Western Juniper Woodland and Savanna	3	Shrubland	Low Sagebrush Shrubland and Steppe	SRM 406: Low Sagebrush	Shrub-dominated	Herbaceous - shrub-steppe	Non-Forested	Sh Columbia Plateau Low Sagebrush Steppe	Shrub	Perennial graminoid steppe	Non-Forested	No	Shrubland
KBOFUELRUPPERKLAMATHOCPI_03	883.001	183.052	1016.12	0.189737	0.076095	601.54	28.59	11.4275	45	175	67	1	1279	0.750855		m	E	8	8 <= CBD < 9	Succession Class B	0	No Disturbance	NA	Upland Forest	10310	California Montane Jeffrey Pine(-Ponderosa Pine) Woodland	120	Jeffrey Pine-1	Conifer	104	Tree Cover >= 40 and < 50%	7	Cascade Mountain Range	1000	Mediterranean California Mesic Mixed Conifer Forest and Woodland	5	Conifer	Ponderosa Pine Forest, Woodland and Savanna	SAF 237: Interior Ponderosa Pine	Tree-dominated	Open tree canopy	100 <= CH < 250	Tr Northern Rocky Mountain Ponderosa Pine Woodland and Savanna	Tree	Evergreen open tree canopy	40 <= CC < 50	No	Conifer
KBOFUELRUPPERKLAMATHR500_02	1550.25	186.488	292.832	0.123693	0.01451	842.98	28.77	11.4075	35	175	69	1	1270	0.74398		r	E	6	6 <= CBD < 7	Succession Class B	0	No Disturbance	NA	Upland Forest	10532	Northern Rocky Mountain Ponderosa Pine Woodland and Savanna - Xeric	149	Ponderosa Pine-3	Conifer	103	Tree Cover >= 30 and < 40%	7	Cascade Mountain Range	1000	Mediterranean California Mesic Mixed Conifer Forest and Woodland	5	Conifer	Ponderosa Pine Forest, Woodland and Savanna	SAF 237: Interior Ponderosa Pine	Tree-dominated	Open tree canopy	100 <= CH < 250	Tr Northern Rocky Mountain Ponderosa Pine Woodland and Savanna	Tree	Evergreen open tree canopy	30 <= CC < 40	No	Conifer
KBOFUELRUPPERKLAMATHR500_06	3781.08	184.79	313.611	0	0.00768	781.19	28.63	11.2225	45	175	75	13	1306	0.676287		m	E	8	8 <= CBD < 9	Succession Class C	0	No Disturbance	NA	Upland Forest	10280	Mediterranean California Mesic Mixed Conifer Forest and Woodland	117	Douglas Fir-White Fir-Sugar Pine-1	Conifer	104	Tree Cover >= 40 and < 50%	7	Cascade Mountain Range	1000	Mediterranean California Mesic Mixed Conifer Forest and Woodland	5	Conifer	Douglas-fir-Grand Fir-White Fir Forest and Woodland	SAF 211: White Fir	Tree-dominated	Closed tree canopy	100 <= CH < 250	Tr Mediterranean California Mesic Mixed Conifer Forest and Woodland	Tree	Evergreen closed tree canopy	40 <= CC < 50	No	Conifer
KBOFUELRUPPERKLAMATHR500_08	164.896	185.046	1136.71	0.829759	0.018443	887.56	28.21	11.0875	65	375	75	13	1297	0.687115		m	E	12	12 <= CBD < 13	Succession Class E	0	No Disturbance	NA	Upland Forest	10280	Mediterranean California Mesic Mixed Conifer Forest and Woodland	117	Douglas Fir-White Fir-Sugar Pine-1	Conifer	106	Tree Cover >= 60 and < 70%	7	Cascade Mountain Range	1000	Mediterranean California Mesic Mixed Conifer Forest and Woodland	5	Conifer	Douglas-fir-Grand Fir-White Fir Forest and Woodland	SAF 211: White Fir	Tree-dominated	Closed tree canopy	250 <= CH < 500	Tr Mediterranean California Mesic Mixed Conifer Forest and Woodland	Tree	Evergreen closed tree canopy	60 <= CC < 70	No	Conifer
KBOFUELRUPPERKLAMATHRANO_03	1320.52	167.331	462.651	10.1239	5.45191	518.46	29.23	13.615	25	175	60	17	1049	0.965888		s	S	4	4 <= CBD < 5	Succession Class C	0	No Disturbance	NA	Upland Woodland	10270	Mediterranean California Dry-Mesic Mixed Conifer Forest and Woodland	116	Ponderosa Pine-Incense Cedar-1	Conifer	102	Tree Cover >= 20 and < 30%	7	Cascade Mountain Range	1000	Mediterranean California Dry-Mesic Mixed Conifer Forest and Woodland	4	Conifer	Douglas-fir-Ponderosa Pine-Lodgepole Pine Forest and Woodland	SAF 243: Sierra Nevada Mixed Conifer	Tree-dominated	Open tree canopy	100 <= CH < 250	Tr Mediterranean California Dry-Mesic Mixed Conifer Forest and Woodland	Tree	Evergreen open tree canopy	20 <= CC < 30	No	Mixed
KBOFUELRUPPERKLAMATHRPTR_06	1278.75	182.742	567.405	0.254558	0.218767	672.56	28.53	11.24	55	375	73	14	1349	0.713013		s	E	9	9 <= CBD < 10	Succession Class E	0	No Disturbance	NA	Upland Forest	10280	Mediterranean California Mesic Mixed Conifer Forest and Woodland	117	Douglas Fir-White Fir-Sugar Pine-1	Conifer	105	Tree Cover >= 50 and < 60%	7	Cascade Mountain Range	1000	Mediterranean California Mesic Mixed Conifer Forest and Woodland	5	Conifer	Douglas-fir-Grand Fir-White Fir Forest and Woodland	SAF 211: White Fir	Tree-dominated	Closed tree canopy	250 <= CH < 500	Tr Mediterranean California Mesic Mixed Conifer Forest and Woodland	Tree	Evergreen closed tree canopy	50 <= CC < 60	No	Mixed
KBOFUELRUPPERKLAMATHRPTR_10	2001.55	182.887	903.348	0.684105	0.342	758.77	28.47	10.655	75	375	81	15	1421	0.735918		r	SE	16	16 <= CBD < 17	Succession Class E	0	No Disturbance	NA	Upland Forest	10280	Mediterranean California Mesic Mixed Conifer Forest and Woodland	117	Douglas Fir-White Fir-Sugar Pine-1	Conifer	107	Tree Cover >= 70 and < 80%	7	Cascade Mountain Range	1000	Mediterranean California Mesic Mixed Conifer Forest and Woodland	5	Conifer	Douglas-fir-Grand Fir-White Fir Forest and Woodland	SAF 211: White Fir	Tree-dominated	Closed tree canopy	250 <= CH < 500	Tr Mediterranean California Mesic Mixed Conifer Forest and Woodland	Tree	Evergreen closed tree canopy	70 <= CC < 80	No	Conifer
KBOFUELRUPPERKLAMATHSCVA_09	1137.63	254.3	1521.07	65.7448	65.6098	446.47	29.61	11.865	0	0	41	3	1519	0.795703		n	SW	0	Non-Forested	Succession Class B	0	No Disturbance	NA	Upland Woodland	10170	Columbia Plateau Western Juniper Woodland and Savanna	108	Western Juniper-Low Sage-3	Conifer	113	Shrub Cover >= 30 and < 40%	7	Cascade Mountain Range	1000	Columbia Plateau Western Juniper Woodland and Savanna	4	Shrubland	Big Sagebrush Shrubland and Steppe	SRM 403: Wyoming Big Sagebrush	Shrub-dominated	Shrubland	Non-Forested	Sh Inter-Mountain Basins Big Sagebrush Shrubland	Shrub	Evergreen shrubland	Non-Forested	No	Conifer
KBOFUELRUPPERKLAMATHSLRW_01	2140.01	230.661	745.616	38.5199	38.4864	359.96	29.51	12.115	0	0	31	19	1465	0.977237		ag	W	0	Non-Forested	Succession Class C	0	No Disturbance	NA	Upland Shrub	11250	Inter-Mountain Basins Big Sagebrush Steppe	220	Wyoming Big Sage-Wheatgrass-3	Shrubland	112	Shrub Cover >= 20 and < 30%	7	Cascade Mountain Range	1100	Inter-Mountain Basins Montane Sagebrush Steppe	3	Shrubland	Big Sagebrush Shrubland and Steppe	SRM 402: Mountain Big Sagebrush	Shrub-dominated	Herbaceous - shrub-steppe	Non-Forested	Sh Inter-Mountain Basins Montane Sagebrush Steppe	Shrub	Perennial graminoid steppe	Non-Forested	No	Shrubland
KBOFUELRUPPERKLAMATHSLRW_09	2155.63	230.687	642.568	38.2321	38.2002	349.35	30	12.145	0	0	32	13	1458	0.587758		u	NE	0	Non-Forested	Succession Class E	0	No Disturbance	NA	Upland Woodland	10170	Columbia Plateau Western Juniper Woodland and Savanna	108	Western Juniper-Low Sage-3	Conifer	103	Tree Cover >= 30 and < 40%	7	Cascade Mountain Range	1000	Columbia Plateau Western Juniper Woodland and Savanna	4	Conifer	Juniper Woodland and Savanna	SAF 238: Western Juniper	Tree-dominated	Open tree canopy	Non-Forested	Tr Juniperus occidentalis Woodland Alliance	Tree	Evergreen open tree canopy	Non-Forested	No	Shrubland
KBOFUELRUPPERKLAMATHSLRW_12	1749.77	230.361	1159.96	37.9814	37.949	353.39	29.94	12.12	0	0	33	5	1444	0.805993		ag	W	0	Non-Forested	Succession Class B	0	No Disturbance	NA	Upland Shrub	10170	Columbia Plateau Western Juniper Woodland and Savanna	108	Western Juniper-Low Sage-3	Conifer	112	Shrub Cover >= 20 and < 30%	7	Cascade Mountain Range	1000	Columbia Plateau Western Juniper Woodland and Savanna	3	Shrubland	Low Sagebrush Shrubland and Steppe	SRM 406: Low Sagebrush	Shrub-dominated	Herbaceous - shrub-steppe	Non-Forested	Sh Columbia Plateau Low Sagebrush Steppe	Shrub	Perennial graminoid steppe	Non-Forested	No	Shrubland
KBOFUELRUPPERKLAMATHSODS_03	854.419	256.128	632.15	73.9985	73.4462	406.54	29.57	11.86	0	0	24	1	1453	0.779573		ah	W	0	Non-Forested	Succession Class D	0	No Disturbance	NA	Upland Shrub	11250	Inter-Mountain Basins Big Sagebrush Steppe	220	Wyoming Big Sage-Wheatgrass-3	Shrubland	113	Shrub Cover >= 30 and < 40%	7	Cascade Mountain Range	1000	Columbia Plateau Western Juniper Woodland and Savanna	3	Shrubland	Big Sagebrush Shrubland and Steppe	SRM 403: Wyoming Big Sagebrush	Shrub-dominated	Shrubland	Non-Forested	Sh Inter-Mountain Basins Big Sagebrush Shrubland	Shrub	Evergreen shrubland	Non-Forested	No	Shrubland
KBOFUELRUPPERKLAMATHSODS_12	640.699	255.562	811.717	73.5081	72.9398	398.43	29.68	11.9275	0	0	24	1	1433	0.769683		ag	W	0	Non-Forested	Succession Class C	0	No Disturbance	NA	Upland Shrub	11250	Inter-Mountain Basins Big Sagebrush Steppe	220	Wyoming Big Sage-Wheatgrass-3	Shrubland	112	Shrub Cover >= 20 and < 30%	7	Cascade Mountain Range	1000	Columbia Plateau Western Juniper Woodland and Savanna	3	Shrubland	Low Sagebrush Shrubland and Steppe	SRM 406: Low Sagebrush	Shrub-dominated	Herbaceous - shrub-steppe	Non-Forested	Sh Columbia Plateau Low Sagebrush Steppe	Shrub	Perennial graminoid steppe	Non-Forested	No	Shrubland
KBOFUELRUPPERKLAMATHSPRG_04	2773.67	164.632	571.775	7.63186	3.19731	509.7	28.33	14.0475	0	0	48	12	1027	0.820912		w	SE	0	Non-Forested	Succession Class A	0	No Disturbance	NA	Upland Shrub	10270	Mediterranean California Dry-Mesic Mixed Conifer Forest and Woodland	116	Ponderosa Pine-Incense Cedar-1	Conifer	112	Shrub Cover >= 20 and < 30%	7	Cascade Mountain Range	1000	Mediterranean California Dry-Mesic Mixed Conifer Forest and Woodland	3	Shrubland	Chaparral	SRM 206: Chamise Chaparral	Shrub-dominated	Shrubland	Non-Forested	Sh Northern and Central California Dry-Mesic Chaparral	Shrub	Evergreen shrubland	Non-Forested	No	Mixed
KBOFUELRUPPERKLAMATHSQPO_04	6158.18	261.235	1100.24	75.9255	75.6263	484.15	28.93	11.435	0	0	45	12	1559	0.909224		h	W	0	Non-Forested	Succession Class E	0	No Disturbance	NA	Upland Woodland	10170	Columbia Plateau Western Juniper Woodland and Savanna	108	Western Juniper-Low Sage-3	Conifer	103	Tree Cover >= 30 and < 40%	7	Cascade Mountain Range	1000	Columbia Plateau Western Juniper Woodland and Savanna	4	Conifer	Juniper Woodland and Savanna	SAF 238: Western Juniper	Tree-dominated	Open tree canopy	Non-Forested	Tr Juniperus occidentalis Woodland Alliance	Tree	Evergreen open tree canopy	Non-Forested	No	Conifer
KBOFUELRUPPERKLAMATHSTUP_07	3093.18	211.176	819.388	27.2003	25.2257	450.23	28.6	11.6825	25	175	34	20	1683	0.770192		ag	NW	4	4 <= CBD < 5	Succession Class C	0	No Disturbance	NA	Upland Woodland	10280	Mediterranean California Mesic Mixed Conifer Forest and Woodland	117	Douglas Fir-White Fir-Sugar Pine-1	Conifer	102	Tree Cover >= 20 and < 30%	7	Cascade Mountain Range	1000	Mediterranean California Mesic Mixed Conifer Forest and Woodland	4	Conifer	Douglas-fir-Grand Fir-White Fir Forest and Woodland	SAF 211: White Fir	Tree-dominated	Closed tree canopy	100 <= CH < 250	Tr Mediterranean California Mesic Mixed Conifer Forest and Woodland	Tree	Evergreen closed tree canopy	20 <= CC < 30	No	Shrubland
KBOFUELRUPPERKLAMATHSTUP_12	2324.84	210.669	996.162	26.3431	24.3874	389.68	29.36	12.49	0	0	34	8	1451	0.824679		ag	NW	0	Non-Forested	Succession Class B	0	No Disturbance	NA	Upland Shrub	10170	Columbia Plateau Western Juniper Woodland and Savanna	108	Western Juniper-Low Sage-3	Conifer	111	Shrub Cover >= 10 and < 20%	7	Cascade Mountain Range	1000	Columbia Plateau Western Juniper Woodland and Savanna	3	Shrubland	Low Sagebrush Shrubland and Steppe	SRM 406: Low Sagebrush	Shrub-dominated	Herbaceous - shrub-steppe	Non-Forested	Sh Columbia Plateau Low Sagebrush Steppe	Shrub	Perennial graminoid steppe	Non-Forested	No	Shrubland
KBOFUELRUPPERKLAMATHSWEA_01	1134.53	171.328	859.981	13.8008	9.13009	531.7	28.74	12.31	0	0	54	4	1265	0.807691		s	S	0	Non-Forested	Uncharacteristic Native Vegetation Cover / Struct*	0	No Disturbance	NA	Upland Shrub	10170	Columbia Plateau Western Juniper Woodland and Savanna	108	Western Juniper-Low Sage-3	Conifer	114	Shrub Cover >= 40 and < 50%	7	Cascade Mountain Range	1000	Columbia Plateau Western Juniper Woodland and Savanna	3	Shrubland	Big Sagebrush Shrubland and Steppe	SRM 403: Wyoming Big Sagebrush	Shrub-dominated	Shrubland	Non-Forested	Sh Inter-Mountain Basins Big Sagebrush Shrubland	Shrub	Evergreen shrubland	Non-Forested	No	Mixed
KBOFUELRUPPERKLAMATHTOMA_05	1240.8	180.7	1078.97	0.684763	0.042303	613.19	28.5	11.19	55	375	69	18	1398	0.655116		r	E	9	9 <= CBD < 10	Succession Class E	0	No Disturbance	NA	Upland Forest	10280	Mediterranean California Mesic Mixed Conifer Forest and Woodland	117	Douglas Fir-White Fir-Sugar Pine-1	Conifer	105	Tree Cover >= 50 and < 60%	7	Cascade Mountain Range	1000	Mediterranean California Mesic Mixed Conifer Forest and Woodland	5	Conifer	Douglas-fir-Grand Fir-White Fir Forest and Woodland	SAF 211: White Fir	Tree-dominated	Closed tree canopy	250 <= CH < 500	Tr Mediterranean California Mesic Mixed Conifer Forest and Woodland	Tree	Evergreen closed tree canopy	50 <= CC < 60	No	Conifer
KBOFUELRUPPERKLAMATHVARN_08	448.482	178.42	407.973	0.51788	0.042923	659.06	28.48	11.42	45	175	65	2	1289	0.7527		m	N	8	8 <= CBD < 9	Succession Class C	0	No Disturbance	NA	Upland Forest	10280	Mediterranean California Mesic Mixed Conifer Forest and Woodland	117	Douglas Fir-White Fir-Sugar Pine-1	Conifer	104	Tree Cover >= 40 and < 50%	7	Cascade Mountain Range	1000	Mediterranean California Mesic Mixed Conifer Forest and Woodland	5	Conifer	Douglas-fir-Grand Fir-White Fir Forest and Woodland	SAF 211: White Fir	Tree-dominated	Closed tree canopy	100 <= CH < 250	Tr Mediterranean California Mesic Mixed Conifer Forest and Woodland	Tree	Evergreen closed tree canopy	40 <= CC < 50	No	Conifer
KBOFUELRUPPERKLAMATHVARN_14	847.892	177.974	881.288	0.870517	0.341597	692.21	28.51	11.1775	45	175	65	2	1300	0.737886		m	Flat	8	8 <= CBD < 9	Succession Class C	0	No Disturbance	NA	Upland Forest	10280	Mediterranean California Mesic Mixed Conifer Forest and Woodland	117	Douglas Fir-White Fir-Sugar Pine-1	Conifer	104	Tree Cover >= 40 and < 50%	7	Cascade Mountain Range	1000	Mediterranean California Mesic Mixed Conifer Forest and Woodland	5	Conifer	Ponderosa Pine Forest, Woodland and Savanna	SAF 237: Interior Ponderosa Pine	Tree-dominated	Open tree canopy	100 <= CH < 250	Tr Northern Rocky Mountain Ponderosa Pine Woodland and Savanna	Tree	Evergreen open tree canopy	40 <= CC < 50	No	Conifer
KBOFUELRUPPERKLAMATHWCSO_03	1093.24	168.573	836.583	11.0908	6.79484	500.71	30.17	14.2075	35	175	53	5	993	0.784335		s	SE	1	1 <= CBD < 2	Succession Class B	0	No Disturbance	NA	Upland Woodland	10300	Mediterranean California Lower Montane Black Oak-Conifer Forest and Woodland	119	Ponderosa Pine-California Black Oak-1	Conifer	103	Tree Cover >= 30 and < 40%	7	Cascade Mountain Range	1000	Mediterranean California Dry-Mesic Mixed Conifer Forest and Woodland	4	Conifer	Conifer-Oak Forest and Woodland	SAF 246: California Black Oak	Tree-dominated	Open tree canopy	100 <= CH < 250	Tr Mediterranean California Lower Montane Conifer Forest and Woodland	Tree	Evergreen open tree canopy	30 <= CC < 40	No	Mixed
KBOFUELRUPPERKLAMATHWIND_06	1808.17	227.232	1306.48	37.2101	36.9341	314.53	29.97	12.1975	0	0	36	19	1365	0.494236		ag	NE	0	Non-Forested	Succession Class E	0	No Disturbance	NA	Upland Woodland	10170	Columbia Plateau Western Juniper Woodland and Savanna	108	Western Juniper-Low Sage-3	Conifer	102	Tree Cover >= 20 and < 30%	7	Cascade Mountain Range	1000	Columbia Plateau Western Juniper Woodland and Savanna	4	Conifer	Juniper Woodland and Savanna	SAF 238: Western Juniper	Tree-dominated	Open tree canopy	Non-Forested	Tr Juniperus occidentalis Woodland Alliance	Tree	Evergreen open tree canopy	Non-Forested	No	Shrubland
KBOFUELRUPPERKLAMATHWIND_09	2539.47	226.513	1375.78	36.46	36.1823	313.15	29.94	12.3425	0	0	34	15	1314	0.583641		z	N	0	Non-Forested	Succession Class E	0	No Disturbance	NA	Upland Woodland	10170	Columbia Plateau Western Juniper Woodland and Savanna	108	Western Juniper-Low Sage-3	Conifer	102	Tree Cover >= 20 and < 30%	7	Cascade Mountain Range	1000	Columbia Plateau Western Juniper Woodland and Savanna	4	Conifer	Juniper Woodland and Savanna	SAF 238: Western Juniper	Tree-dominated	Open tree canopy	Non-Forested	Tr Juniperus occidentalis Woodland Alliance	Tree	Evergreen open tree canopy	Non-Forested	No	Mixed
KBOFUELRUPPERKLAMATHWVDJ_05	1330.77	244.034	508.379	64.7649	63.7197	318.9	30.03	12.325	0	0	26	1	1296	0.77143		ag	S	0	Non-Forested	Succession Class B	0	No Disturbance	NA	Upland Woodland	11250	Inter-Mountain Basins Big Sagebrush Steppe	220	Wyoming Big Sage-Wheatgrass-3	Shrubland	112	Shrub Cover >= 20 and < 30%	7	Cascade Mountain Range	1200	Inter-Mountain Basins Greasewood Flat	4	Shrubland	Greasewood Shrubland	SRM 501: Saltbush-Greasewood	Shrub-dominated	Shrubland	Non-Forested	Sh Inter-Mountain Basins Greasewood Flat	Shrub	Evergreen shrubland	Non-Forested	No	Shrubland
KBOGRAZICSNM 113A_01	526.425	148.579	362.743	3.34201	0.041541	630	27.52	12.8225	65	175	77	14	1274	0.540595		r	NE	16	16 <= CBD < 17	Succession Class B	0	No Disturbance	NA	Upland Forest	10280	Mediterranean California Mesic Mixed Conifer Forest and Woodland	117	Douglas Fir-White Fir-Sugar Pine-1	Conifer	106	Tree Cover >= 60 and < 70%	7	Cascade Mountain Range	1000	Mediterranean California Mesic Mixed Conifer Forest and Woodland	5	Conifer	Douglas-fir-Grand Fir-White Fir Forest and Woodland	SAF 211: White Fir	Tree-dominated	Closed tree canopy	100 <= CH < 250	Tr Mediterranean California Mesic Mixed Conifer Forest and Woodland	Tree	Evergreen closed tree canopy	60 <= CC < 70	No	Conifer
KBOGRAZICSNM 1192_04	241.82	151.394	291.269	8.34264	0.290496	820.15	27.72	10.6925	55	375	75	8	1465	0.661543		m	E	9	9 <= CBD < 10	Succession Class E	0	No Disturbance	NA	Upland Forest	10280	Mediterranean California Mesic Mixed Conifer Forest and Woodland	117	Douglas Fir-White Fir-Sugar Pine-1	Conifer	105	Tree Cover >= 50 and < 60%	7	Cascade Mountain Range	1000	Mediterranean California Mesic Mixed Conifer Forest and Woodland	5	Conifer	Douglas-fir-Grand Fir-White Fir Forest and Woodland	SAF 211: White Fir	Tree-dominated	Closed tree canopy	250 <= CH < 500	Tr Mediterranean California Mesic Mixed Conifer Forest and Woodland	Tree	Evergreen closed tree canopy	50 <= CC < 60	No	Conifer
KBOGRAZICSNM 1760_07	439.377	144.116	777.849	2.62101	0.408538	767.74	26.98	12.16	45	175	82	25	1547	0.670902		m	E	8	8 <= CBD < 9	Succession Class C	0	No Disturbance	NA	Upland Forest	10280	Mediterranean California Mesic Mixed Conifer Forest and Woodland	117	Douglas Fir-White Fir-Sugar Pine-1	Conifer	104	Tree Cover >= 40 and < 50%	7	Cascade Mountain Range	1000	Mediterranean California Mesic Mixed Conifer Forest and Woodland	5	Conifer	Douglas-fir-Grand Fir-White Fir Forest and Woodland	SAF 211: White Fir	Tree-dominated	Closed tree canopy	100 <= CH < 250	Tr Mediterranean California Mesic Mixed Conifer Forest and Woodland	Tree	Evergreen closed tree canopy	40 <= CC < 50	No	Conifer
KBOGRAZICSNM 1760_11	639.937	144.788	592.695	1.81395	0.147691	710.74	26.25	12.66	65	375	82	7	1437	0.648593		m	NE	12	12 <= CBD < 13	Succession Class E	0	No Disturbance	NA	Upland Forest	10280	Mediterranean California Mesic Mixed Conifer Forest and Woodland	117	Douglas Fir-White Fir-Sugar Pine-1	Conifer	106	Tree Cover >= 60 and < 70%	7	Cascade Mountain Range	1000	Mediterranean California Mesic Mixed Conifer Forest and Woodland	5	Conifer	Douglas-fir-Grand Fir-White Fir Forest and Woodland	SAF 211: White Fir	Tree-dominated	Closed tree canopy	250 <= CH < 500	Tr Mediterranean California Mesic Mixed Conifer Forest and Woodland	Tree	Evergreen closed tree canopy	60 <= CC < 70	No	Conifer
KBOGRAZICSNM 1761_03	150.984	145.474	86.135	1.98091	0.254671	681	27.43	12.705	55	375	87	7	1351	0.650766		m	NE	9	9 <= CBD < 10	Succession Class E	0	No Disturbance	NA	Upland Forest	10280	Mediterranean California Mesic Mixed Conifer Forest and Woodland	117	Douglas Fir-White Fir-Sugar Pine-1	Conifer	105	Tree Cover >= 50 and < 60%	7	Cascade Mountain Range	1000	Mediterranean California Mesic Mixed Conifer Forest and Woodland	5	Conifer	Douglas-fir-Grand Fir-White Fir Forest and Woodland	SAF 211: White Fir	Tree-dominated	Closed tree canopy	250 <= CH < 500	Tr Mediterranean California Mesic Mixed Conifer Forest and Woodland	Tree	Evergreen closed tree canopy	50 <= CC < 60	No	Conifer
KBOGRAZICSNM 393E_11	522.772	145.67	0	4.14402	0.209383	885.6	26.44	10.9575	15	175	63	0	1530	0.7556		m	Flat	3	3 <= CBD < 4	Succession Class B	0	No Disturbance	NA	Upland Forest	11520	California Montane Riparian Systems	249	Black Cottonwood-Arroyo Willow-Madrone-3	Riparian	101	Tree Cover >= 10 and < 20%	7	Cascade Mountain Range	1200	California Montane Riparian Systems	5	Riparian	Western Riparian Woodland and Shrubland	SRM 203: Riparian Woodland	Tree-dominated	Open tree canopy	100 <= CH < 250	Tr California Montane Riparian Systems	Tree	Mixed evergreen-deciduous open tree canopy	10 <= CC < 20	No	Conifer
KBOGRAZICSNM 513A_03	1977.3	146.117	1979.44	2.44035	0.276589	892.5	25.57	11.1	45	375	79	8	1571	0.861659		m	SW	6	6 <= CBD < 7	Succession Class D	0	No Disturbance	NA	Upland Forest	10280	Mediterranean California Mesic Mixed Conifer Forest and Woodland	117	Douglas Fir-White Fir-Sugar Pine-1	Conifer	104	Tree Cover >= 40 and < 50%	7	Cascade Mountain Range	1000	Mediterranean California Mesic Mixed Conifer Forest and Woodland	5	Conifer	Douglas-fir-Grand Fir-White Fir Forest and Woodland	SAF 211: White Fir	Tree-dominated	Closed tree canopy	250 <= CH < 500	Tr Mediterranean California Mesic Mixed Conifer Forest and Woodland	Tree	Evergreen closed tree canopy	40 <= CC < 50	No	Conifer
KBOGRAZICSNM 524A_04	1155.92	135.459	626.544	2.4862	0.2865	733.44	25.55	12.0925	35	175	72	10	1377	0.783508		z	SE	6	6 <= CBD < 7	Succession Class C	0	No Disturbance	NA	Upland Woodland	10280	Mediterranean California Mesic Mixed Conifer Forest and Woodland	117	Douglas Fir-White Fir-Sugar Pine-1	Conifer	103	Tree Cover >= 30 and < 40%	7	Cascade Mountain Range	1000	Mediterranean California Mesic Mixed Conifer Forest and Woodland	4	Conifer	Douglas-fir-Grand Fir-White Fir Forest and Woodland	SAF 211: White Fir	Tree-dominated	Closed tree canopy	100 <= CH < 250	Tr Mediterranean California Mesic Mixed Conifer Forest and Woodland	Tree	Evergreen closed tree canopy	30 <= CC < 40	No	Mixed
KBOGRAZICSNM 524A_12	499.421	135.322	199.705	1.90966	0.07967	733.44	25.55	12.0925	65	375	70	4	1541	0.7386		m	E	12	12 <= CBD < 13	Succession Class E	0	No Disturbance	NA	Upland Forest	10280	Mediterranean California Mesic Mixed Conifer Forest and Woodland	117	Douglas Fir-White Fir-Sugar Pine-1	Conifer	106	Tree Cover >= 60 and < 70%	7	Cascade Mountain Range	1000	Mediterranean California Mesic Mixed Conifer Forest and Woodland	5	Conifer	Douglas-fir-Grand Fir-White Fir Forest and Woodland	SAF 211: White Fir	Tree-dominated	Closed tree canopy	250 <= CH < 500	Tr Mediterranean California Mesic Mixed Conifer Forest and Woodland	Tree	Evergreen closed tree canopy	60 <= CC < 70	No	Conifer
KBOGRAZICSNM 536A_07	1079.81	135.218	1352.33	2.75036	0.457126	662.6	27.11	12.82	35	175	72	25	1240	0.484194		s	E	6	6 <= CBD < 7	Succession Class B	0	No Disturbance	NA	Upland Woodland	11730	North Pacific Wooded Volcanic Flowage	271	Lodgepole Pine-Lichen-5	Conifer	103	Tree Cover >= 30 and < 40%	7	Cascade Mountain Range	1200	North Pacific Wooded Volcanic Flowage	4	Conifer	Douglas-fir-Ponderosa Pine-Lodgepole Pine Forest and Woodland	SAF 218: Lodgepole Pine	Tree-dominated	Open tree canopy	100 <= CH < 250	Tr North Pacific Wooded Volcanic Flowage	Tree	Evergreen open tree canopy	30 <= CC < 40	No	Mixed
KBOGRAZICSNM 585_09	309.994	148.682	1156.15	6.47236	0.078851	557.32	28.6	13.805	25	175	65	5	1082	0.811761		r	S	4	4 <= CBD < 5	Succession Class C	0	No Disturbance	NA	Upland Woodland	10270	Mediterranean California Dry-Mesic Mixed Conifer Forest and Woodland	116	Ponderosa Pine-Incense Cedar-1	Conifer	102	Tree Cover >= 20 and < 30%	7	Cascade Mountain Range	1000	Mediterranean California Dry-Mesic Mixed Conifer Forest and Woodland	4	Conifer	Douglas-fir-Ponderosa Pine-Lodgepole Pine Forest and Woodland	SAF 243: Sierra Nevada Mixed Conifer	Tree-dominated	Open tree canopy	100 <= CH < 250	Tr Mediterranean California Dry-Mesic Mixed Conifer Forest and Woodland	Tree	Evergreen open tree canopy	20 <= CC < 30	No	Conifer
KBOGRAZICSNM 637_02	157.346	143.118	148.32	5.51543	0.109673	861.22	25.34	10.9025	65	375	75	21	1686	0.802068		m	NW	12	12 <= CBD < 13	Succession Class E	0	No Disturbance	NA	Upland Forest	10280	Mediterranean California Mesic Mixed Conifer Forest and Woodland	117	Douglas Fir-White Fir-Sugar Pine-1	Conifer	106	Tree Cover >= 60 and < 70%	7	Cascade Mountain Range	1000	Mediterranean California Mesic Mixed Conifer Forest and Woodland	5	Conifer	Douglas-fir-Grand Fir-White Fir Forest and Woodland	SAF 211: White Fir	Tree-dominated	Closed tree canopy	250 <= CH < 500	Tr Mediterranean California Mesic Mixed Conifer Forest and Woodland	Tree	Evergreen closed tree canopy	60 <= CC < 70	No	Conifer
KBOGRAZICSNM 637_03	262.688	142.671	54.739	6.10955	0.415103	849.3	25.29	10.9475	55	375	80	15	1696	0.597046		m	N	9	9 <= CBD < 10	Succession Class B	0	No Disturbance	NA	Upland Forest	10320	Mediterranean California Red Fir Forest	121	Red Fir-1	Conifer	105	Tree Cover >= 50 and < 60%	7	Cascade Mountain Range	1000	Mediterranean California Red Fir Forest	5	Conifer	Red Fir Forest and Woodland	SAF 207: Red Fir	Tree-dominated	Open tree canopy	250 <= CH < 500	Tr Mediterranean California Red Fir Forest	Tree	Evergreen open tree canopy	50 <= CC < 60	No	Conifer
KBOGRAZICSNM 74A_03	75.506	147.663	299.419	1.32816	0.010314	606.6	28.51	12.95	0	0	73	16	1189	0.616274		m	N	0	Non-Forested	Succession Class E	0	No Disturbance	NA	Upland Forest	10270	Mediterranean California Dry-Mesic Mixed Conifer Forest and Woodland	116	Ponderosa Pine-Incense Cedar-1	Conifer	106	Tree Cover >= 60 and < 70%	7	Cascade Mountain Range	1000	Mediterranean California Dry-Mesic Mixed Conifer Forest and Woodland	5	Conifer	Conifer-Oak Forest and Woodland	SAF 246: California Black Oak	Tree-dominated	Open tree canopy	Non-Forested	Tr Mediterranean California Lower Montane Conifer Forest and Woodland	Tree	Evergreen open tree canopy	Non-Forested	No	Conifer
KBOGRAZICSNM 76A_04	82.527	137.852	905.101	4.41418	0.272733	671.32	27.59	14.0725	85	375	78	20	1089	0.965275		ac	W	22	22 <= CBD < 23	Uncharacteristic Native Vegetation Cover / Struct*	0	No Disturbance	NA	Upland Forest	10600	East Cascades Oak-Ponderosa Pine Forest and Woodland	162	Ponderosa Pine-Oregon White Oak-1	Conifer	108	Tree Cover >= 80 and < 90%	7	Cascade Mountain Range	1000	Mediterranean California Dry-Mesic Mixed Conifer Forest and Woodland	5	Conifer	Douglas-fir-Ponderosa Pine-Lodgepole Pine Forest and Woodland	SAF 243: Sierra Nevada Mixed Conifer	Tree-dominated	Open tree canopy	250 <= CH < 500	Tr Mediterranean California Dry-Mesic Mixed Conifer Forest and Woodland	Tree	Evergreen open tree canopy	80 <= CC < 90	No	Conifer
KBOGRAZICSNM 862A_04	1668.97	146.693	1159.14	1.96815	0.341995	829.48	26.07	11.305	65	375	86	15	1693	0.940541		m	S	12	12 <= CBD < 13	Succession Class E	0	No Disturbance	NA	Upland Forest	10280	Mediterranean California Mesic Mixed Conifer Forest and Woodland	117	Douglas Fir-White Fir-Sugar Pine-1	Conifer	106	Tree Cover >= 60 and < 70%	7	Cascade Mountain Range	1000	Mediterranean California Mesic Mixed Conifer Forest and Woodland	5	Conifer	Douglas-fir-Grand Fir-White Fir Forest and Woodland	SAF 211: White Fir	Tree-dominated	Closed tree canopy	250 <= CH < 500	Tr Mediterranean California Mesic Mixed Conifer Forest and Woodland	Tree	Evergreen closed tree canopy	60 <= CC < 70	No	Conifer
KBOGRAZICSNM 918A_02	118.692	143.177	96.933	4.58254	0.026959	837.32	25.45	11.815	45	175	82	14	1639	0.642615		m	E	8	8 <= CBD < 9	Succession Class C	0	No Disturbance	NA	Upland Forest	10280	Mediterranean California Mesic Mixed Conifer Forest and Woodland	117	Douglas Fir-White Fir-Sugar Pine-1	Conifer	104	Tree Cover >= 40 and < 50%	7	Cascade Mountain Range	1000	Mediterranean California Mesic Mixed Conifer Forest and Woodland	5	Conifer	Douglas-fir-Grand Fir-White Fir Forest and Woodland	SAF 211: White Fir	Tree-dominated	Closed tree canopy	100 <= CH < 250	Tr Mediterranean California Mesic Mixed Conifer Forest and Woodland	Tree	Evergreen closed tree canopy	40 <= CC < 50	No	Conifer
KBOGRAZICSNM 989A_06	465.052	143.402	251.015	5.98836	0.177883	861.22	25.36	10.8925	0	0	75	11	1825	0.739123		m	E	0	Non-Forested	Succession Class A	0	No Disturbance	NA	Sparsely Vegetated	10280	Mediterranean California Mesic Mixed Conifer Forest and Woodland	117	Douglas Fir-White Fir-Sugar Pine-1	Conifer	100	Sparse Vegetation Canopy	7	Cascade Mountain Range	1000	Mediterranean California Mesic Mixed Conifer Forest and Woodland	1	Sparsely Vegetated	Sparse Vegetation	LF 33: Sparsely Vegetated	No Dominant Lifeform	Sparsely vegetated	Non-Forested	Sps Inter-Mountain Basins Sparsely Vegetated Systems	Sparse	Sparsely vegetated	Non-Forested	No	Conifer
KBOGRAZICSNM 989A_09	1003.93	143.184	568.9	6.6577	0.613799	839.94	25.43	10.995	55	375	79	18	1655	0.96577		ac	S	9	9 <= CBD < 10	Succession Class E	0	No Disturbance	NA	Upland Forest	10280	Mediterranean California Mesic Mixed Conifer Forest and Woodland	117	Douglas Fir-White Fir-Sugar Pine-1	Conifer	105	Tree Cover >= 50 and < 60%	7	Cascade Mountain Range	1000	Mediterranean California Mesic Mixed Conifer Forest and Woodland	5	Conifer	Douglas-fir-Grand Fir-White Fir Forest and Woodland	SAF 211: White Fir	Tree-dominated	Closed tree canopy	250 <= CH < 500	Tr Mediterranean California Mesic Mixed Conifer Forest and Woodland	Tree	Evergreen closed tree canopy	50 <= CC < 60	No	Conifer
KBOGRAZICSNM AGF1_01	1062.12	150.837	250.43	4.39733	0.406012	545.48	29.03	14.2825	25	175	52	0	1007	0.747709		z	N	4	4 <= CBD < 5	Succession Class C	0	No Disturbance	NA	Upland Woodland	10270	Mediterranean California Dry-Mesic Mixed Conifer Forest and Woodland	116	Ponderosa Pine-Incense Cedar-1	Conifer	102	Tree Cover >= 20 and < 30%	7	Cascade Mountain Range	1000	Mediterranean California Dry-Mesic Mixed Conifer Forest and Woodland	4	Conifer	Douglas-fir-Ponderosa Pine-Lodgepole Pine Forest and Woodland	SAF 243: Sierra Nevada Mixed Conifer	Tree-dominated	Open tree canopy	100 <= CH < 250	Tr Mediterranean California Dry-Mesic Mixed Conifer Forest and Woodland	Tree	Evergreen open tree canopy	20 <= CC < 30	No	Mixed
KBOGRAZICSNM AGF1_10	821.963	151.372	822.375	4.56956	0.046105	547.95	29.11	14.345	25	175	44	16	1011	0.941092		w	SW	4	4 <= CBD < 5	Succession Class C	0	No Disturbance	NA	Upland Woodland	10280	Mediterranean California Mesic Mixed Conifer Forest and Woodland	117	Douglas Fir-White Fir-Sugar Pine-1	Conifer	102	Tree Cover >= 20 and < 30%	7	Cascade Mountain Range	1000	Mediterranean California Mesic Mixed Conifer Forest and Woodland	4	Conifer	Douglas-fir-Grand Fir-White Fir Forest and Woodland	SAF 211: White Fir	Tree-dominated	Closed tree canopy	100 <= CH < 250	Tr Mediterranean California Mesic Mixed Conifer Forest and Woodland	Tree	Evergreen closed tree canopy	20 <= CC < 30	No	Mixed
KBOGRAZICSNM AGF1_11	579.9	151.413	825.796	4.29797	0.066281	547.95	29.11	14.345	15	75	52	4	972	0.718326		z	E	5	5 <= CBD < 6	Succession Class A	0	No Disturbance	NA	Upland Woodland	10270	Mediterranean California Dry-Mesic Mixed Conifer Forest and Woodland	116	Ponderosa Pine-Incense Cedar-1	Conifer	101	Tree Cover >= 10 and < 20%	7	Cascade Mountain Range	1000	Mediterranean California Dry-Mesic Mixed Conifer Forest and Woodland	4	Conifer	Conifer-Oak Forest and Woodland	SAF 237: Interior Ponderosa Pine	Tree-dominated	Open tree canopy	50 <= CH < 100	Tr East Cascades Ponderosa Pine Forest and Woodland	Tree	Evergreen open tree canopy	10 <= CC < 20	No	Mixed
KBOGRAZICSNM AGF2_05	353.332	150.738	1089.21	3.2711	0.769553	543.86	29.03	14.3625	35	175	68	2	1014	0.785513		s	S	6	6 <= CBD < 7	Succession Class C	0	No Disturbance	NA	Upland Woodland	10270	Mediterranean California Dry-Mesic Mixed Conifer Forest and Woodland	116	Ponderosa Pine-Incense Cedar-1	Conifer	103	Tree Cover >= 30 and < 40%	7	Cascade Mountain Range	1000	Mediterranean California Dry-Mesic Mixed Conifer Forest and Woodland	4	Conifer	Douglas-fir-Ponderosa Pine-Lodgepole Pine Forest and Woodland	SAF 243: Sierra Nevada Mixed Conifer	Tree-dominated	Open tree canopy	100 <= CH < 250	Tr Mediterranean California Dry-Mesic Mixed Conifer Forest and Woodland	Tree	Evergreen open tree canopy	30 <= CC < 40	No	Mixed
KBOGRAZICSNM BOOR_11	75.24	154.027	0	6.59372	0.364444	522.5	29.87	14.0075	0	0	52	2	962	0.775388		s	NW	0	Non-Forested	Succession Class A	0	No Disturbance	NA	Wetland Herb	11540	Inter-Mountain Basins Montane Riparian Systems	259	Black Cottonwood-Narrowleaf Willow-3	Riparian	112	Shrub Cover >= 20 and < 30%	7	Cascade Mountain Range	1200	Inter-Mountain Basins Montane Riparian Systems	9	Riparian	Western Riparian Woodland and Shrubland	SAF 235: Cottonwood-Willow	Tree-dominated	Open tree canopy	Non-Forested	Tr Inter-Mountain Basins Montane Riparian Systems	Shrub	Mixed evergreen-deciduous shrubland	Non-Forested	No	Mixed
KBOGRAZICSNM BXOR_04	218.487	153.279	419.734	6.63597	0.103006	526.75	29.62	14.01	0	0	64	10	987	0.884128		s	S	0	Non-Forested	Succession Class A	0	No Disturbance	NA	Upland Shrub	10270	Mediterranean California Dry-Mesic Mixed Conifer Forest and Woodland	116	Ponderosa Pine-Incense Cedar-1	Conifer	112	Shrub Cover >= 20 and < 30%	7	Cascade Mountain Range	1000	Mediterranean California Dry-Mesic Mixed Conifer Forest and Woodland	3	Shrubland	Chaparral	SRM 206: Chamise Chaparral	Shrub-dominated	Shrubland	Non-Forested	Sh Northern and Central California Dry-Mesic Chaparral	Shrub	Evergreen shrubland	Non-Forested	No	Mixed
KBOGRAZICSNM BXOR_11	830.206	152.681	873.816	5.98476	0.597342	533	29.36	13.9575	35	175	58	20	1029	0.940286		n	SW	6	6 <= CBD < 7	Succession Class C	0	No Disturbance	NA	Upland Woodland	10270	Mediterranean California Dry-Mesic Mixed Conifer Forest and Woodland	116	Ponderosa Pine-Incense Cedar-1	Conifer	103	Tree Cover >= 30 and < 40%	7	Cascade Mountain Range	1000	Mediterranean California Dry-Mesic Mixed Conifer Forest and Woodland	4	Conifer	Douglas-fir-Ponderosa Pine-Lodgepole Pine Forest and Woodland	SAF 243: Sierra Nevada Mixed Conifer	Tree-dominated	Open tree canopy	100 <= CH < 250	Tr Mediterranean California Dry-Mesic Mixed Conifer Forest and Woodland	Tree	Evergreen open tree canopy	30 <= CC < 40	No	Conifer
KBOGRAZICSNM CHMO_07	748.279	147.25	158.599	4.692	0.67818	916.73	26.08	10.7125	45	375	70	9	1664	0.855449		m	SW	6	6 <= CBD < 7	Succession Class D	0	No Disturbance	NA	Upland Forest	10280	Mediterranean California Mesic Mixed Conifer Forest and Woodland	117	Douglas Fir-White Fir-Sugar Pine-1	Conifer	104	Tree Cover >= 40 and < 50%	7	Cascade Mountain Range	1000	Mediterranean California Mesic Mixed Conifer Forest and Woodland	5	Conifer	Douglas-fir-Grand Fir-White Fir Forest and Woodland	SAF 211: White Fir	Tree-dominated	Closed tree canopy	250 <= CH < 500	Tr Mediterranean California Mesic Mixed Conifer Forest and Woodland	Tree	Evergreen closed tree canopy	40 <= CC < 50	No	Conifer
KBOGRAZICSNM CHMO_08	622.39	147.452	115.693	4.67615	0.503842	916.73	26.08	10.7125	55	375	71	5	1675	0.818213		m	W	9	9 <= CBD < 10	Succession Class E	0	No Disturbance	NA	Upland Forest	10280	Mediterranean California Mesic Mixed Conifer Forest and Woodland	117	Douglas Fir-White Fir-Sugar Pine-1	Conifer	105	Tree Cover >= 50 and < 60%	7	Cascade Mountain Range	1000	Mediterranean California Mesic Mixed Conifer Forest and Woodland	5	Conifer	Douglas-fir-Grand Fir-White Fir Forest and Woodland	SAF 211: White Fir	Tree-dominated	Closed tree canopy	250 <= CH < 500	Tr Mediterranean California Mesic Mixed Conifer Forest and Woodland	Tree	Evergreen closed tree canopy	50 <= CC < 60	No	Conifer
KBOGRAZICSNM CRPR_02	31.55	150.125	0	6.9287	0.288562	850.01	26.69	11.52	25	175	71	10	1482	0.878646		m	W	4	4 <= CBD < 5	Succession Class B	0	No Disturbance	NA	Wetland Shrub	11520	California Montane Riparian Systems	249	Black Cottonwood-Arroyo Willow-Madrone-3	Riparian	102	Tree Cover >= 20 and < 30%	7	Cascade Mountain Range	1200	California Montane Riparian Systems	8	Riparian	Western Riparian Woodland and Shrubland	SRM 203: Riparian Woodland	Tree-dominated	Open tree canopy	100 <= CH < 250	Tr California Montane Riparian Systems	Tree	Mixed evergreen-deciduous open tree canopy	20 <= CC < 30	No	Conifer
KBOGRAZICSNM CRPR_08	496.181	149.433	475.303	6.93234	0.371933	865.52	26.48	11.4675	35	375	77	11	1544	0.867335		m	SW	5	5 <= CBD < 6	Succession Class D	0	No Disturbance	NA	Upland Forest	10280	Mediterranean California Mesic Mixed Conifer Forest and Woodland	117	Douglas Fir-White Fir-Sugar Pine-1	Conifer	103	Tree Cover >= 30 and < 40%	7	Cascade Mountain Range	1000	Mediterranean California Mesic Mixed Conifer Forest and Woodland	5	Conifer	Douglas-fir-Grand Fir-White Fir Forest and Woodland	SAF 211: White Fir	Tree-dominated	Closed tree canopy	250 <= CH < 500	Tr Mediterranean California Mesic Mixed Conifer Forest and Woodland	Tree	Evergreen closed tree canopy	30 <= CC < 40	No	Conifer
KBOGRAZICSNM FRSP_09	17.416	157.315	516.234	5.57621	0.065949	580.56	28.62	12.0975	35	175	70	25	1146	1.02754		z	W	6	6 <= CBD < 7	Succession Class C	0	No Disturbance	NA	Upland Forest	11540	Inter-Mountain Basins Montane Riparian Systems	259	Black Cottonwood-Narrowleaf Willow-3	Riparian	103	Tree Cover >= 30 and < 40%	7	Cascade Mountain Range	1200	Inter-Mountain Basins Montane Riparian Systems	5	Riparian	Western Riparian Woodland and Shrubland	SAF 235: Cottonwood-Willow	Tree-dominated	Open tree canopy	100 <= CH < 250	Tr Inter-Mountain Basins Montane Riparian Systems	Tree	Mixed evergreen-deciduous open tree canopy	30 <= CC < 40	No	Mixed
KBOGRAZICSNM FRSP_12	31.611	156.847	1146.05	6.26878	0.014589	602.23	28.74	12.1975	45	175	74	11	1152	0.633981		r	E	8	8 <= CBD < 9	Succession Class C	0	No Disturbance	NA	Upland Forest	10280	Mediterranean California Mesic Mixed Conifer Forest and Woodland	117	Douglas Fir-White Fir-Sugar Pine-1	Conifer	104	Tree Cover >= 40 and < 50%	7	Cascade Mountain Range	1000	Mediterranean California Mesic Mixed Conifer Forest and Woodland	5	Conifer	Douglas-fir-Grand Fir-White Fir Forest and Woodland	SAF 211: White Fir	Tree-dominated	Closed tree canopy	100 <= CH < 250	Tr Mediterranean California Mesic Mixed Conifer Forest and Woodland	Tree	Evergreen closed tree canopy	40 <= CC < 50	No	Conifer
KBOGRAZICSNM FRSU_05	182.496	157.207	67.777	5.02757	0.408	554.89	28.36	12.255	65	375	70	22	1176	0.477294		m	NE	12	12 <= CBD < 13	Succession Class E	0	No Disturbance	NA	Upland Forest	10280	Mediterranean California Mesic Mixed Conifer Forest and Woodland	117	Douglas Fir-White Fir-Sugar Pine-1	Conifer	106	Tree Cover >= 60 and < 70%	7	Cascade Mountain Range	1000	Mediterranean California Mesic Mixed Conifer Forest and Woodland	5	Conifer	Douglas-fir-Grand Fir-White Fir Forest and Woodland	SAF 211: White Fir	Tree-dominated	Closed tree canopy	250 <= CH < 500	Tr Mediterranean California Mesic Mixed Conifer Forest and Woodland	Tree	Evergreen closed tree canopy	60 <= CC < 70	No	Conifer
KBOGRAZICSNM HOBL_10	218.337	142.793	105.923	3.52548	0.009416	772.47	26.03	12	45	175	83	12	1481	0.62572		m	N	8	8 <= CBD < 9	Succession Class C	0	No Disturbance	NA	Upland Forest	10280	Mediterranean California Mesic Mixed Conifer Forest and Woodland	117	Douglas Fir-White Fir-Sugar Pine-1	Conifer	104	Tree Cover >= 40 and < 50%	7	Cascade Mountain Range	1000	Mediterranean California Mesic Mixed Conifer Forest and Woodland	5	Conifer	Douglas-fir-Grand Fir-White Fir Forest and Woodland	SAF 211: White Fir	Tree-dominated	Closed tree canopy	100 <= CH < 250	Tr Mediterranean California Mesic Mixed Conifer Forest and Woodland	Tree	Evergreen closed tree canopy	40 <= CC < 50	No	Conifer
KBOGRAZICSNM JE45_06	915.437	151.726	1469.17	5.22698	0.105679	542.17	28.93	13.9675	15	75	50	9	1039	0.870095		w	W	5	5 <= CBD < 6	Succession Class A	0	No Disturbance	NA	Upland Woodland	10600	East Cascades Oak-Ponderosa Pine Forest and Woodland	162	Ponderosa Pine-Oregon White Oak-1	Conifer	101	Tree Cover >= 10 and < 20%	7	Cascade Mountain Range	1000	Mediterranean California Lower Montane Black Oak-Conifer Forest and Woodland	4	Conifer	Conifer-Oak Forest and Woodland	SAF 237: Interior Ponderosa Pine	Tree-dominated	Open tree canopy	50 <= CH < 100	Tr East Cascades Ponderosa Pine Forest and Woodland	Tree	Evergreen open tree canopy	10 <= CC < 20	No	Mixed
KBOGRAZICSNM JECR_08	78.736	155.408	907.503	3.30014	0.555603	598.34	28.47	12.445	0	0	69	32	1118	0.690169		r	SE	0	Non-Forested	Succession Class D	0	No Disturbance	NA	Upland Shrub	10270	Mediterranean California Dry-Mesic Mixed Conifer Forest and Woodland	116	Ponderosa Pine-Incense Cedar-1	Conifer	113	Shrub Cover >= 30 and < 40%	7	Cascade Mountain Range	1000	Mediterranean California Dry-Mesic Mixed Conifer Forest and Woodland	3	Shrubland	Deciduous Shrubland	SRM 421: Chokecherry-Serviceberry-Rose	Shrub-dominated	Shrubland	Non-Forested	Sh Northern Rocky Mountain Montane-Foothill Deciduous Shrubland	Shrub	Mixed evergreen-deciduous shrubland	Non-Forested	No	Conifer
KBOGRAZICSNM JECU_01	39.53	156.271	227.011	4.14	0.23153	584.55	28.43	12.375	25	75	67	6	1104	0.777899		r	SE	6	6 <= CBD < 7	Succession Class B	0	No Disturbance	NA	Upland Woodland	11540	Inter-Mountain Basins Montane Riparian Systems	259	Black Cottonwood-Narrowleaf Willow-3	Riparian	102	Tree Cover >= 20 and < 30%	7	Cascade Mountain Range	1200	Inter-Mountain Basins Montane Riparian Systems	4	Riparian	Western Riparian Woodland and Shrubland	SAF 235: Cottonwood-Willow	Tree-dominated	Open tree canopy	50 <= CH < 100	Tr Inter-Mountain Basins Montane Riparian Systems	Tree	Mixed evergreen-deciduous open tree canopy	20 <= CC < 30	No	Conifer
KBOGRAZICSNM JECU_13	848.389	156.594	405.942	3.21	0.197035	536.66	28.74	12.2825	15	175	56	2	1234	0.7527		m	E	3	3 <= CBD < 4	Succession Class C	0	No Disturbance	NA	Upland Forest	10280	Mediterranean California Mesic Mixed Conifer Forest and Woodland	117	Douglas Fir-White Fir-Sugar Pine-1	Conifer	101	Tree Cover >= 10 and < 20%	7	Cascade Mountain Range	1000	Mediterranean California Mesic Mixed Conifer Forest and Woodland	5	Conifer	Douglas-fir-Grand Fir-White Fir Forest and Woodland	SAF 211: White Fir	Tree-dominated	Closed tree canopy	100 <= CH < 250	Tr Mediterranean California Mesic Mixed Conifer Forest and Woodland	Tree	Evergreen closed tree canopy	10 <= CC < 20	No	Conifer
KBOGRAZICSNM JEN3_08	122.114	152.815	569.023	4.63721	0.32306	537.66	29.47	14.29	35	175	64	9	970	0.870741		s	W	1	1 <= CBD < 2	Succession Class C	0	No Disturbance	NA	Upland Woodland	10270	Mediterranean California Dry-Mesic Mixed Conifer Forest and Woodland	116	Ponderosa Pine-Incense Cedar-1	Conifer	103	Tree Cover >= 30 and < 40%	7	Cascade Mountain Range	1000	Mediterranean California Dry-Mesic Mixed Conifer Forest and Woodland	4	Conifer	Conifer-Oak Forest and Woodland	SAF 246: California Black Oak	Tree-dominated	Open tree canopy	100 <= CH < 250	Tr Mediterranean California Lower Montane Conifer Forest and Woodland	Tree	Evergreen open tree canopy	30 <= CC < 40	No	Mixed
KBOGRAZICSNM KECR_02	102.315	146.377	235.182	0.12	0.022638	663.23	28.56	12.6225	65	375	92	26	1251	1.03472		ac	S	12	12 <= CBD < 13	Succession Class E	0	No Disturbance	NA	Upland Forest	10280	Mediterranean California Mesic Mixed Conifer Forest and Woodland	117	Douglas Fir-White Fir-Sugar Pine-1	Conifer	106	Tree Cover >= 60 and < 70%	7	Cascade Mountain Range	1000	Mediterranean California Mesic Mixed Conifer Forest and Woodland	5	Conifer	Douglas-fir-Grand Fir-White Fir Forest and Woodland	SAF 211: White Fir	Tree-dominated	Closed tree canopy	250 <= CH < 500	Tr Mediterranean California Mesic Mixed Conifer Forest and Woodland	Tree	Evergreen closed tree canopy	60 <= CC < 70	No	Conifer
KBOGRAZICSNM KECR_09	49.854	146.674	63.541	0.636396	0.192162	663.23	28.56	12.6225	55	175	95	4	1184	0.691291		r	NE	11	11 <= CBD < 12	Succession Class C	0	No Disturbance	NA	Upland Forest	11540	Inter-Mountain Basins Montane Riparian Systems	259	Black Cottonwood-Narrowleaf Willow-3	Riparian	105	Tree Cover >= 50 and < 60%	7	Cascade Mountain Range	1200	Inter-Mountain Basins Montane Riparian Systems	5	Riparian	Western Riparian Woodland and Shrubland	SAF 235: Cottonwood-Willow	Tree-dominated	Open tree canopy	100 <= CH < 250	Tr Inter-Mountain Basins Montane Riparian Systems	Tree	Mixed evergreen-deciduous open tree canopy	50 <= CC < 60	No	Conifer
KBOGRAZICSNM NACO_03	71.97	134.879	283.799	1.23693	0.132504	697.57	26	12.525	25	175	76	9	1426	0.676547		r	E	4	4 <= CBD < 5	Succession Class C	0	No Disturbance	NA	Upland Woodland	10280	Mediterranean California Mesic Mixed Conifer Forest and Woodland	117	Douglas Fir-White Fir-Sugar Pine-1	Conifer	102	Tree Cover >= 20 and < 30%	7	Cascade Mountain Range	1000	Mediterranean California Mesic Mixed Conifer Forest and Woodland	4	Conifer	Ponderosa Pine Forest, Woodland and Savanna	SAF 237: Interior Ponderosa Pine	Tree-dominated	Open tree canopy	100 <= CH < 250	Tr Northern Rocky Mountain Ponderosa Pine Woodland and Savanna	Tree	Evergreen open tree canopy	20 <= CC < 30	No	Conifer
KBOGRAZICSNM RAPA_07	1563.37	150.77	675.08	4.47644	0.927074	555.69	28.81	13.165	15	75	67	18	1215	0.938607		s	SW	5	5 <= CBD < 6	Succession Class A	0	No Disturbance	NA	Upland Woodland	10280	Mediterranean California Mesic Mixed Conifer Forest and Woodland	117	Douglas Fir-White Fir-Sugar Pine-1	Conifer	101	Tree Cover >= 10 and < 20%	7	Cascade Mountain Range	1000	Mediterranean California Mesic Mixed Conifer Forest and Woodland	4	Conifer	Douglas-fir-Grand Fir-White Fir Forest and Woodland	SAF 211: White Fir	Tree-dominated	Closed tree canopy	50 <= CH < 100	Tr Mediterranean California Mesic Mixed Conifer Forest and Woodland	Tree	Evergreen closed tree canopy	10 <= CC < 20	No	Mixed
KBOGRAZICSNM RAPA_08	1265.7	150.605	972.834	4.12574	0.900188	569.34	28.72	12.5825	45	175	67	18	1243	0.966117		s	SW	8	8 <= CBD < 9	Succession Class C	0	No Disturbance	NA	Upland Forest	10280	Mediterranean California Mesic Mixed Conifer Forest and Woodland	117	Douglas Fir-White Fir-Sugar Pine-1	Conifer	104	Tree Cover >= 40 and < 50%	7	Cascade Mountain Range	1000	Mediterranean California Mesic Mixed Conifer Forest and Woodland	5	Conifer	Douglas-fir-Grand Fir-White Fir Forest and Woodland	SAF 211: White Fir	Tree-dominated	Closed tree canopy	100 <= CH < 250	Tr Mediterranean California Mesic Mixed Conifer Forest and Woodland	Tree	Evergreen closed tree canopy	40 <= CC < 50	No	Mixed
KBOGRAZICSNM SCCR_07	295.108	139.057	1847.32	5.38164	0.152398	663.47	26.7	12.7275	55	375	72	17	1299	0.963362		r	S	9	9 <= CBD < 10	Succession Class D	0	No Disturbance	NA	Upland Forest	10270	Mediterranean California Dry-Mesic Mixed Conifer Forest and Woodland	116	Ponderosa Pine-Incense Cedar-1	Conifer	105	Tree Cover >= 50 and < 60%	7	Cascade Mountain Range	1000	Mediterranean California Dry-Mesic Mixed Conifer Forest and Woodland	5	Conifer	Douglas-fir-Ponderosa Pine-Lodgepole Pine Forest and Woodland	SAF 243: Sierra Nevada Mixed Conifer	Tree-dominated	Open tree canopy	250 <= CH < 500	Tr Mediterranean California Dry-Mesic Mixed Conifer Forest and Woodland	Tree	Evergreen open tree canopy	50 <= CC < 60	No	Conifer
KBOGRAZICSNM SCCR_19	1012.27	141.006	1469.7	7.51205	0.272583	644.04	26.29	12.6875	55	375	86	26	1444	0.453122		m	NE	9	9 <= CBD < 10	Succession Class E	0	No Disturbance	NA	Upland Forest	10280	Mediterranean California Mesic Mixed Conifer Forest and Woodland	117	Douglas Fir-White Fir-Sugar Pine-1	Conifer	105	Tree Cover >= 50 and < 60%	7	Cascade Mountain Range	1000	Mediterranean California Mesic Mixed Conifer Forest and Woodland	5	Conifer	Douglas-fir-Grand Fir-White Fir Forest and Woodland	SAF 211: White Fir	Tree-dominated	Closed tree canopy	250 <= CH < 500	Tr Mediterranean California Mesic Mixed Conifer Forest and Woodland	Tree	Evergreen closed tree canopy	50 <= CC < 60	No	Conifer
KBOGRAZICSNM SKCO_02	214.881	134.253	366.007	0.933381	0.063283	696.22	25.37	12.315	35	175	83	8	1513	0.85157		x	SW	6	6 <= CBD < 7	Succession Class C	0	No Disturbance	NA	Upland Woodland	10280	Mediterranean California Mesic Mixed Conifer Forest and Woodland	117	Douglas Fir-White Fir-Sugar Pine-1	Conifer	103	Tree Cover >= 30 and < 40%	7	Cascade Mountain Range	1000	Mediterranean California Mesic Mixed Conifer Forest and Woodland	4	Conifer	Ponderosa Pine Forest, Woodland and Savanna	SAF 237: Interior Ponderosa Pine	Tree-dominated	Open tree canopy	100 <= CH < 250	Tr Northern Rocky Mountain Ponderosa Pine Woodland and Savanna	Tree	Evergreen open tree canopy	30 <= CC < 40	No	Conifer
KBOGRAZICSNM SKCO_12	38.253	133.722	185.12	0.742159	0.218111	678.93	26.68	12.5725	45	175	80	13	1291	0.65346		x	N	8	8 <= CBD < 9	Succession Class C	0	No Disturbance	NA	Upland Forest	10270	Mediterranean California Dry-Mesic Mixed Conifer Forest and Woodland	116	Ponderosa Pine-Incense Cedar-1	Conifer	104	Tree Cover >= 40 and < 50%	7	Cascade Mountain Range	1000	Mediterranean California Mesic Mixed Conifer Forest and Woodland	5	Conifer	Douglas-fir-Grand Fir-White Fir Forest and Woodland	SAF 211: White Fir	Tree-dominated	Closed tree canopy	100 <= CH < 250	Tr Mediterranean California Mesic Mixed Conifer Forest and Woodland	Tree	Evergreen closed tree canopy	40 <= CC < 50	No	Conifer
KBOGRAZICSNM SKOO_05	957.828	146.765	1775.03	7.33179	0.69585	621.23	28.16	13.01	45	175	75	23	1224	0.441276		g	NE	8	8 <= CBD < 9	Succession Class C	0	No Disturbance	NA	Upland Forest	10280	Mediterranean California Mesic Mixed Conifer Forest and Woodland	117	Douglas Fir-White Fir-Sugar Pine-1	Conifer	104	Tree Cover >= 40 and < 50%	7	Cascade Mountain Range	1000	Mediterranean California Mesic Mixed Conifer Forest and Woodland	5	Conifer	California Mixed Evergreen Forest and Woodland	SAF 234: Douglas-Fir-Tanoak-Pacific Madrone	Tree-dominated	Closed tree canopy	100 <= CH < 250	Tr Mediterranean California Mixed Evergreen Forest	Tree	Evergreen closed tree canopy	40 <= CC < 50	No	Conifer
KBOGRAZICSNM SOMN_07	714.333	149.859	90.808	6.73071	0.024025	554.88	28.91	13.7525	25	175	48	22	1078	0.987365		s	SW	1	1 <= CBD < 2	Succession Class C	0	No Disturbance	NA	Upland Woodland	10600	East Cascades Oak-Ponderosa Pine Forest and Woodland	162	Ponderosa Pine-Oregon White Oak-1	Conifer	102	Tree Cover >= 20 and < 30%	7	Cascade Mountain Range	1000	Mediterranean California Lower Montane Black Oak-Conifer Forest and Woodland	4	Hardwood	Western Oak Woodland and Savanna	SAF 233: Oregon White Oak	Tree-dominated	Open tree canopy	100 <= CH < 250	Tr Quercus garryana Woodland Alliance	Tree	Deciduous open tree canopy	20 <= CC < 30	No	Mixed
KBOGRAZICSNM SOMN_08	459.143	149.758	303.606	6.98382	0.09237	554.88	28.91	13.7525	15	75	52	5	1071	0.817872		w	SW	5	5 <= CBD < 6	Succession Class A	0	No Disturbance	NA	Upland Woodland	10600	East Cascades Oak-Ponderosa Pine Forest and Woodland	162	Ponderosa Pine-Oregon White Oak-1	Conifer	101	Tree Cover >= 10 and < 20%	7	Cascade Mountain Range	1000	Mediterranean California Lower Montane Black Oak-Conifer Forest and Woodland	4	Conifer	Conifer-Oak Forest and Woodland	SAF 237: Interior Ponderosa Pine	Tree-dominated	Open tree canopy	50 <= CH < 100	Tr East Cascades Ponderosa Pine Forest and Woodland	Tree	Evergreen open tree canopy	10 <= CC < 20	No	Mixed
KBOGRAZICSNM SSPR_08	367.199	152.324	812.258	0.778845	0.317436	500.6	29.49	13.3825	55	375	60	0	1087	0.754787		m	E	9	9 <= CBD < 10	Succession Class D	0	No Disturbance	NA	Upland Forest	10270	Mediterranean California Dry-Mesic Mixed Conifer Forest and Woodland	116	Ponderosa Pine-Incense Cedar-1	Conifer	105	Tree Cover >= 50 and < 60%	7	Cascade Mountain Range	1000	Mediterranean California Dry-Mesic Mixed Conifer Forest and Woodland	5	Conifer	Douglas-fir-Ponderosa Pine-Lodgepole Pine Forest and Woodland	SAF 243: Sierra Nevada Mixed Conifer	Tree-dominated	Open tree canopy	250 <= CH < 500	Tr Mediterranean California Dry-Mesic Mixed Conifer Forest and Woodland	Tree	Evergreen open tree canopy	50 <= CC < 60	No	Conifer
KBOGRAZICSNM TCRK_10	185.583	141.097	1038.31	1.20934	0.408306	690.93	28.29	13.5075	65	375	80	18	1034	0.495718		m	NE	12	12 <= CBD < 13	Succession Class B	0	No Disturbance	NA	Upland Forest	10300	Mediterranean California Lower Montane Black Oak-Conifer Forest and Woodland	119	Ponderosa Pine-California Black Oak-1	Conifer	106	Tree Cover >= 60 and < 70%	7	Cascade Mountain Range	1000	Mediterranean California Dry-Mesic Mixed Conifer Forest and Woodland	5	Conifer-Hardwood	Conifer-Oak Forest and Woodland	SAF 246: California Black Oak	Tree-dominated	Open tree canopy	250 <= CH < 500	Tr Mediterranean California Lower Montane Black Oak - Conifer Forest and Woodland	Tree	Mixed evergreen-deciduous closed tree canopy	60 <= CC < 70	No	Conifer
KBOGRAZICSNM TRSO_02	203.955	154.142	281.53	8.11804	0.009416	757.52	27.36	11.01	35	175	85	19	1366	0.939951		m	S	6	6 <= CBD < 7	Succession Class C	0	No Disturbance	NA	Upland Woodland	10280	Mediterranean California Mesic Mixed Conifer Forest and Woodland	117	Douglas Fir-White Fir-Sugar Pine-1	Conifer	103	Tree Cover >= 30 and < 40%	7	Cascade Mountain Range	1000	Mediterranean California Mesic Mixed Conifer Forest and Woodland	4	Conifer	Douglas-fir-Grand Fir-White Fir Forest and Woodland	SAF 211: White Fir	Tree-dominated	Closed tree canopy	100 <= CH < 250	Tr Mediterranean California Mesic Mixed Conifer Forest and Woodland	Tree	Evergreen closed tree canopy	30 <= CC < 40	No	Conifer
KBOGRAZICSNM TYLRCR_05	113.351	142.16	348.363	0.474342	0.317921	741.13	28.1	12.2925	75	375	92	2	1139	0.786048		s	SW	16	16 <= CBD < 17	Succession Class E	0	No Disturbance	NA	Upland Forest	10290	Mediterranean California Mixed Oak Woodland	118	Oregon White Oak-Romers Fescue-Oatgrass-1	Hardwood	107	Tree Cover >= 70 and < 80%	7	Cascade Mountain Range	1000	Mediterranean California Mesic Mixed Conifer Forest and Woodland	5	Conifer	Douglas-fir-Grand Fir-White Fir Forest and Woodland	SAF 211: White Fir	Tree-dominated	Closed tree canopy	250 <= CH < 500	Tr Mediterranean California Mesic Mixed Conifer Forest and Woodland	Tree	Evergreen closed tree canopy	70 <= CC < 80	No	Mixed
KBOGRAZICSNM TYLRCR_13	267.407	139.853	2115.57	0.349857	0.19744	643.57	28.16	13.1825	25	75	62	18	931	0.84212		w	SE	6	6 <= CBD < 7	Succession Class A	0	No Disturbance	NA	Upland Woodland	10600	East Cascades Oak-Ponderosa Pine Forest and Woodland	162	Ponderosa Pine-Oregon White Oak-1	Conifer	102	Tree Cover >= 20 and < 30%	7	Cascade Mountain Range	1000	Mediterranean California Dry-Mesic Mixed Conifer Forest and Woodland	4	Conifer	Conifer-Oak Forest and Woodland	SAF 237: Interior Ponderosa Pine	Tree-dominated	Open tree canopy	50 <= CH < 100	Tr East Cascades Ponderosa Pine Forest and Woodland	Tree	Evergreen open tree canopy	20 <= CC < 30	No	Mixed
KBOGRAZICSNM TYLRCR_26	229.103	138.911	1351.28	1.99945	0.109515	606.63	28.78	14.3975	75	175	82	18	869	0.557436		r	E	22	22 <= CBD < 23	Succession Class B	0	No Disturbance	NA	Upland Forest	10270	Mediterranean California Dry-Mesic Mixed Conifer Forest and Woodland	116	Ponderosa Pine-Incense Cedar-1	Conifer	107	Tree Cover >= 70 and < 80%	7	Cascade Mountain Range	1000	Mediterranean California Dry-Mesic Mixed Conifer Forest and Woodland	5	Conifer	Douglas-fir-Ponderosa Pine-Lodgepole Pine Forest and Woodland	SAF 243: Sierra Nevada Mixed Conifer	Tree-dominated	Open tree canopy	100 <= CH < 250	Tr Mediterranean California Dry-Mesic Mixed Conifer Forest and Woodland	Tree	Evergreen open tree canopy	70 <= CC < 80	No	Conifer
KBOINVENAPPLEGATE 200_15	134.832	116.216	2639.67	13.6441	0.234801	1064.95	24.71	11.975	45	375	88	34	1407	0.448363		m	N	6	6 <= CBD < 7	Succession Class D	0	No Disturbance	NA	Upland Forest	10280	Mediterranean California Mesic Mixed Conifer Forest and Woodland	117	Douglas Fir-White Fir-Sugar Pine-1	Conifer	104	Tree Cover >= 40 and < 50%	2	Oregon Coastal Range	1000	Mediterranean California Mesic Mixed Conifer Forest and Woodland	5	Conifer	Douglas-fir-Grand Fir-White Fir Forest and Woodland	SAF 211: White Fir	Tree-dominated	Closed tree canopy	250 <= CH < 500	Tr Mediterranean California Mesic Mixed Conifer Forest and Woodland	Tree	Evergreen closed tree canopy	40 <= CC < 50	No	Conifer
KBOINVENAPPLEGATE 200_20	180.924	116.971	2572.08	12.875	0.030421	1119.14	24.65	11.8475	45	375	91	32	1349	0.388837		m	NE	6	6 <= CBD < 7	Succession Class D	0	No Disturbance	NA	Upland Forest	10280	Mediterranean California Mesic Mixed Conifer Forest and Woodland	117	Douglas Fir-White Fir-Sugar Pine-1	Conifer	104	Tree Cover >= 40 and < 50%	2	Oregon Coastal Range	1000	Mediterranean California Mesic Mixed Conifer Forest and Woodland	5	Conifer	Douglas-fir-Ponderosa Pine-Lodgepole Pine Forest and Woodland	SAF 243: Sierra Nevada Mixed Conifer	Tree-dominated	Open tree canopy	250 <= CH < 500	Tr Mediterranean California Dry-Mesic Mixed Conifer Forest and Woodland	Tree	Evergreen open tree canopy	40 <= CC < 50	No	Conifer
KBOINVENAPPLEGATE 2040_09	55.132	116.491	2806.83	11.5563	0.237126	1009.25	24.59	12.0525	75	375	79	15	1195	0.622338		ac	N	16	16 <= CBD < 17	Succession Class E	213	Mechanical Add	Low	Upland Forest	10270	Mediterranean California Dry-Mesic Mixed Conifer Forest and Woodland	116	Ponderosa Pine-Incense Cedar-1	Conifer	107	Tree Cover >= 70 and < 80%	2	Oregon Coastal Range	1000	Mediterranean California Dry-Mesic Mixed Conifer Forest and Woodland	5	Conifer	California Mixed Evergreen Forest and Woodland	SAF 234: Douglas-Fir-Tanoak-Pacific Madrone	Tree-dominated	Closed tree canopy	250 <= CH < 500	Tr Mediterranean California Mixed Evergreen Forest	Tree	Evergreen closed tree canopy	70 <= CC < 80	No	Conifer
KBOINVENAPPLEGATE 2040_12	558.336	116.087	3284.62	12.3402	0.119639	1009.25	26	12.19	0	0	79	14	1251	0.738073		k	NW	0	Non-Forested	Succession Class A	332	Mechanical Remove	High	Upland Forest	10270	Mediterranean California Dry-Mesic Mixed Conifer Forest and Woodland	116	Ponderosa Pine-Incense Cedar-1	Conifer	125	Herb Cover >= 50 and < 60%	2	Oregon Coastal Range	1000	Mediterranean California Dry-Mesic Mixed Conifer Forest and Woodland	5	Grassland	Grassland	SRM 214: Coastal Prairie	Herbaceous / Nonvascular-dominated	Herbaceous - grassland	Non-Forested	He California Northern Coastal Grassland	Herb	Perennial graminoid grassland	Non-Forested	No	Conifer
KBOINVENAPPLEGATE 21CR_08	778.29	114.689	1121.68	15.6668	0.688148	1079.11	24.77	11.7825	45	375	90	16	1428	0.578786		m	N	6	6 <= CBD < 7	Succession Class D	0	No Disturbance	NA	Upland Forest	10280	Mediterranean California Mesic Mixed Conifer Forest and Woodland	117	Douglas Fir-White Fir-Sugar Pine-1	Conifer	104	Tree Cover >= 40 and < 50%	2	Oregon Coastal Range	1000	Mediterranean California Mesic Mixed Conifer Forest and Woodland	5	Conifer	Douglas-fir-Ponderosa Pine-Lodgepole Pine Forest and Woodland	SAF 243: Sierra Nevada Mixed Conifer	Tree-dominated	Open tree canopy	250 <= CH < 500	Tr Mediterranean California Dry-Mesic Mixed Conifer Forest and Woodland	Tree	Evergreen open tree canopy	40 <= CC < 50	No	Conifer
KBOINVENAPPLEGATE 21CR_12	213.031	115.196	1420.34	15.048	0.133485	1073.69	25.28	12.2075	75	175	88	21	1268	0.667095		m	E	22	22 <= CBD < 23	Succession Class B	0	No Disturbance	NA	Upland Forest	10270	Mediterranean California Dry-Mesic Mixed Conifer Forest and Woodland	116	Ponderosa Pine-Incense Cedar-1	Conifer	107	Tree Cover >= 70 and < 80%	2	Oregon Coastal Range	1000	Mediterranean California Dry-Mesic Mixed Conifer Forest and Woodland	5	Conifer	California Mixed Evergreen Forest and Woodland	SAF 234: Douglas-Fir-Tanoak-Pacific Madrone	Tree-dominated	Closed tree canopy	100 <= CH < 250	Tr Mediterranean California Mixed Evergreen Forest	Tree	Evergreen closed tree canopy	70 <= CC < 80	No	Conifer
KBOINVENAPPLEGATE 2250_11	506.732	116.116	1610.27	11.1094	0.043766	866.79	25.21	12.97	45	175	81	23	1132	0.906445		r	SE	8	8 <= CBD < 9	Succession Class C	0	No Disturbance	NA	Upland Forest	10270	Mediterranean California Dry-Mesic Mixed Conifer Forest and Woodland	116	Ponderosa Pine-Incense Cedar-1	Conifer	104	Tree Cover >= 40 and < 50%	2	Oregon Coastal Range	1000	Mediterranean California Dry-Mesic Mixed Conifer Forest and Woodland	5	Conifer	Douglas-fir-Ponderosa Pine-Lodgepole Pine Forest and Woodland	SAF 243: Sierra Nevada Mixed Conifer	Tree-dominated	Open tree canopy	100 <= CH < 250	Tr Mediterranean California Dry-Mesic Mixed Conifer Forest and Woodland	Tree	Evergreen open tree canopy	40 <= CC < 50	No	Conifer
KBOINVENAPPLEGATE 2250_17	218.718	114.721	529.848	11.8246	0.150918	787.7	26.6	13.4975	45	25	82	23	1031	0.978331		ac	SW	1	1 <= CBD < 2	Succession Class A	0	No Disturbance	NA	Upland Woodland	10270	Mediterranean California Dry-Mesic Mixed Conifer Forest and Woodland	116	Ponderosa Pine-Incense Cedar-1	Conifer	104	Tree Cover >= 40 and < 50%	2	Oregon Coastal Range	1000	Mediterranean California Dry-Mesic Mixed Conifer Forest and Woodland	4	Conifer	Conifer-Oak Forest and Woodland	SAF 246: California Black Oak	Tree-dominated	Open tree canopy	0 < CH < 50	Tr Mediterranean California Lower Montane Conifer Forest and Woodland	Tree	Evergreen open tree canopy	40 <= CC < 50	No	Conifer
KBOINVENAPPLEGATE 22A_04	405.486	117.087	2562.44	10.5382	0.043269	1048.53	23.26	12.1025	45	175	80	19	1279	0.647161		m	N	8	8 <= CBD < 9	Succession Class C	0	No Disturbance	NA	Upland Forest	10270	Mediterranean California Dry-Mesic Mixed Conifer Forest and Woodland	116	Ponderosa Pine-Incense Cedar-1	Conifer	104	Tree Cover >= 40 and < 50%	2	Oregon Coastal Range	1000	Mediterranean California Dry-Mesic Mixed Conifer Forest and Woodland	5	Conifer	Douglas-fir-Ponderosa Pine-Lodgepole Pine Forest and Woodland	SAF 243: Sierra Nevada Mixed Conifer	Tree-dominated	Open tree canopy	100 <= CH < 250	Tr Mediterranean California Dry-Mesic Mixed Conifer Forest and Woodland	Tree	Evergreen open tree canopy	40 <= CC < 50	No	Conifer
KBOINVENAPPLEGATE 22A_12	477.827	118.498	1080.04	12.205	0.058812	1267.18	22.98	9.395	35	175	78	23	1742	1.01742		m	W	6	6 <= CBD < 7	Succession Class C	0	No Disturbance	NA	Upland Woodland	10320	Mediterranean California Red Fir Forest	121	Red Fir-1	Conifer	103	Tree Cover >= 30 and < 40%	2	Oregon Coastal Range	1000	Mediterranean California Red Fir Forest	4	Conifer	Douglas-fir-Ponderosa Pine-Lodgepole Pine Forest and Woodland	SAF 243: Sierra Nevada Mixed Conifer	Tree-dominated	Open tree canopy	100 <= CH < 250	Tr Mediterranean California Dry-Mesic Mixed Conifer Forest and Woodland	Tree	Evergreen open tree canopy	30 <= CC < 40	No	Conifer
KBOINVENAPPLEGATE 22A_18	1.85	117.703	1863.59	13.9634	0.01456	1230.48	23.04	10.34	45	375	66	6	1623	0.828766		m	W	6	6 <= CBD < 7	Succession Class D	0	No Disturbance	NA	Upland Forest	10280	Mediterranean California Mesic Mixed Conifer Forest and Woodland	117	Douglas Fir-White Fir-Sugar Pine-1	Conifer	104	Tree Cover >= 40 and < 50%	2	Oregon Coastal Range	1000	Mediterranean California Mesic Mixed Conifer Forest and Woodland	5	Conifer	Douglas-fir-Grand Fir-White Fir Forest and Woodland	SAF 211: White Fir	Tree-dominated	Closed tree canopy	250 <= CH < 500	Tr Mediterranean California Mesic Mixed Conifer Forest and Woodland	Tree	Evergreen closed tree canopy	40 <= CC < 50	No	Conifer
KBOINVENAPPLEGATE 22B_15	756.262	117.407	2316.15	14.6398	0.0735	1239.14	23.17	10.045	45	375	63	20	1690	0.981784		m	W	6	6 <= CBD < 7	Succession Class D	0	No Disturbance	NA	Upland Forest	10280	Mediterranean California Mesic Mixed Conifer Forest and Woodland	117	Douglas Fir-White Fir-Sugar Pine-1	Conifer	104	Tree Cover >= 40 and < 50%	2	Oregon Coastal Range	1000	Mediterranean California Mesic Mixed Conifer Forest and Woodland	5	Conifer	Douglas-fir-Grand Fir-White Fir Forest and Woodland	SAF 211: White Fir	Tree-dominated	Closed tree canopy	250 <= CH < 500	Tr Mediterranean California Mesic Mixed Conifer Forest and Woodland	Tree	Evergreen closed tree canopy	40 <= CC < 50	No	Conifer
KBOINVENAPPLEGATE 22B_20	262.626	119.045	1363.04	12.8824	0.043604	1422.3	22.39	8.905	25	75	60	8	1903	0.825921		m	SE	6	6 <= CBD < 7	Succession Class A	0	No Disturbance	NA	Upland Woodland	10320	Mediterranean California Red Fir Forest	121	Red Fir-1	Conifer	102	Tree Cover >= 20 and < 30%	2	Oregon Coastal Range	1000	Mediterranean California Red Fir Forest	4	Conifer	Douglas-fir-Grand Fir-White Fir Forest and Woodland	SAF 211: White Fir	Tree-dominated	Closed tree canopy	50 <= CH < 100	Tr Mediterranean California Mesic Mixed Conifer Forest and Woodland	Tree	Evergreen closed tree canopy	20 <= CC < 30	No	Conifer
KBOINVENAPPLEGATE 2WAT_02	615.086	116.623	1858.12	15.6353	0.125493	1239.53	23.32	10.4125	45	375	69	22	1728	0.509452		m	N	6	6 <= CBD < 7	Succession Class B	0	No Disturbance	NA	Upland Forest	10320	Mediterranean California Red Fir Forest	121	Red Fir-1	Conifer	104	Tree Cover >= 40 and < 50%	2	Oregon Coastal Range	1000	Mediterranean California Red Fir Forest	5	Conifer	Red Fir Forest and Woodland	SAF 207: Red Fir	Tree-dominated	Open tree canopy	250 <= CH < 500	Tr Mediterranean California Red Fir Forest	Tree	Evergreen open tree canopy	40 <= CC < 50	No	Conifer
KBOINVENAPPLEGATE 2WAT_09	229.722	115.827	710.571	15.7105	0.053862	1156.62	24.75	11.59	45	375	90	23	1402	0.877871		r	NW	6	6 <= CBD < 7	Succession Class D	0	No Disturbance	NA	Upland Forest	10270	Mediterranean California Dry-Mesic Mixed Conifer Forest and Woodland	116	Ponderosa Pine-Incense Cedar-1	Conifer	104	Tree Cover >= 40 and < 50%	2	Oregon Coastal Range	1000	Mediterranean California Dry-Mesic Mixed Conifer Forest and Woodland	5	Conifer	Douglas-fir-Ponderosa Pine-Lodgepole Pine Forest and Woodland	SAF 243: Sierra Nevada Mixed Conifer	Tree-dominated	Open tree canopy	250 <= CH < 500	Tr Mediterranean California Dry-Mesic Mixed Conifer Forest and Woodland	Tree	Evergreen open tree canopy	40 <= CC < 50	No	Conifer
KBOINVENAPPLEGATE 610_06	1141.11	114.145	2544.56	13.7121	0.106444	845.11	24.82	12.51	45	175	84	22	1342	0.62916		r	E	8	8 <= CBD < 9	Succession Class C	0	No Disturbance	NA	Upland Forest	10280	Mediterranean California Mesic Mixed Conifer Forest and Woodland	117	Douglas Fir-White Fir-Sugar Pine-1	Conifer	104	Tree Cover >= 40 and < 50%	2	Oregon Coastal Range	1000	Mediterranean California Mesic Mixed Conifer Forest and Woodland	5	Conifer	Douglas-fir-Ponderosa Pine-Lodgepole Pine Forest and Woodland	SAF 243: Sierra Nevada Mixed Conifer	Tree-dominated	Open tree canopy	100 <= CH < 250	Tr Mediterranean California Dry-Mesic Mixed Conifer Forest and Woodland	Tree	Evergreen open tree canopy	40 <= CC < 50	No	Conifer
KBOINVENAPPLEGATE 650T_07	92.456	112.728	509.047	12.0333	0.463617	730.17	27.28	13.905	45	175	94	31	908	1.01927		r	S	8	8 <= CBD < 9	Succession Class C	0	No Disturbance	NA	Upland Forest	10270	Mediterranean California Dry-Mesic Mixed Conifer Forest and Woodland	116	Ponderosa Pine-Incense Cedar-1	Conifer	104	Tree Cover >= 40 and < 50%	2	Oregon Coastal Range	1000	Mediterranean California Dry-Mesic Mixed Conifer Forest and Woodland	5	Conifer-Hardwood	Conifer-Oak Forest and Woodland	SAF 246: California Black Oak	Tree-dominated	Open tree canopy	100 <= CH < 250	Tr Mediterranean California Lower Montane Black Oak - Conifer Forest and Woodland	Tree	Mixed evergreen-deciduous closed tree canopy	40 <= CC < 50	No	Conifer
KBOINVENAPPLEGATE 650T_14	117.727	111.894	252.419	13.5202	0.21837	764.93	27.02	13.5925	0	0	74	10	968	0.811329		m	NW	0	Non-Forested	Succession Class A	113	Fire	Low	Upland Forest	10270	Mediterranean California Dry-Mesic Mixed Conifer Forest and Woodland	116	Ponderosa Pine-Incense Cedar-1	Conifer	102	Tree Cover >= 20 and < 30%	2	Oregon Coastal Range	1000	Mediterranean California Dry-Mesic Mixed Conifer Forest and Woodland	5	Conifer	Conifer-Oak Forest and Woodland	SAF 246: California Black Oak	Tree-dominated	Open tree canopy	Non-Forested	Tr Mediterranean California Lower Montane Conifer Forest and Woodland	Tree	Evergreen open tree canopy	Non-Forested	No	Conifer
KBOINVENAPPLEGATE 830A_06	440.626	106.631	3105.53	14.1165	0.245162	1202.23	23.22	9.81	45	375	82	37	1597	0.316613		m	NE	6	6 <= CBD < 7	Succession Class D	0	No Disturbance	NA	Upland Forest	10280	Mediterranean California Mesic Mixed Conifer Forest and Woodland	117	Douglas Fir-White Fir-Sugar Pine-1	Conifer	104	Tree Cover >= 40 and < 50%	2	Oregon Coastal Range	1000	Mediterranean California Mesic Mixed Conifer Forest and Woodland	5	Conifer	Douglas-fir-Grand Fir-White Fir Forest and Woodland	SAF 211: White Fir	Tree-dominated	Closed tree canopy	250 <= CH < 500	Tr Mediterranean California Mesic Mixed Conifer Forest and Woodland	Tree	Evergreen closed tree canopy	40 <= CC < 50	No	Conifer
KBOINVENAPPLEGATE 830A_09	650.655	107.119	2536.03	15.0922	0.008182	1304.41	22.12	9.0525	15	25	77	18	1741	0.496713		m	NE	5	5 <= CBD < 6	Succession Class A	0	No Disturbance	NA	Upland Woodland	10320	Mediterranean California Red Fir Forest	121	Red Fir-1	Conifer	101	Tree Cover >= 10 and < 20%	2	Oregon Coastal Range	1000	Mediterranean California Red Fir Forest	4	Conifer	Red Fir Forest and Woodland	SAF 207: Red Fir	Tree-dominated	Open tree canopy	0 < CH < 50	Tr Mediterranean California Red Fir Forest	Tree	Evergreen open tree canopy	10 <= CC < 20	No	Conifer
KBOINVENAPPLEGATE 830A_12	226.639	107.776	1993.53	15.8986	0.196391	1344.83	23.1	9.5725	55	175	77	19	1721	0.632538		m	N	11	11 <= CBD < 12	Succession Class B	0	No Disturbance	NA	Upland Forest	10320	Mediterranean California Red Fir Forest	121	Red Fir-1	Conifer	105	Tree Cover >= 50 and < 60%	2	Oregon Coastal Range	1000	Mediterranean California Red Fir Forest	5	Conifer	Red Fir Forest and Woodland	SAF 207: Red Fir	Tree-dominated	Open tree canopy	100 <= CH < 250	Tr Mediterranean California Red Fir Forest	Tree	Evergreen open tree canopy	50 <= CC < 60	No	Conifer
KBOINVENAPPLEGATE ANDE_03	242.089	111.18	1355.42	8.51968	0.034058	870.44	24.96	11.9325	45	375	69	38	1450	0.433289		r	N	6	6 <= CBD < 7	Succession Class D	0	No Disturbance	NA	Upland Forest	10280	Mediterranean California Mesic Mixed Conifer Forest and Woodland	117	Douglas Fir-White Fir-Sugar Pine-1	Conifer	104	Tree Cover >= 40 and < 50%	2	Oregon Coastal Range	1000	Mediterranean California Mesic Mixed Conifer Forest and Woodland	5	Conifer	Douglas-fir-Grand Fir-White Fir Forest and Woodland	SAF 211: White Fir	Tree-dominated	Closed tree canopy	250 <= CH < 500	Tr Mediterranean California Mesic Mixed Conifer Forest and Woodland	Tree	Evergreen closed tree canopy	40 <= CC < 50	No	Conifer
KBOINVENAPPLEGATE APPL_09	532.32	105.856	1407.91	7.74052	0.475917	648.43	25.73	14.065	65	375	75	27	1016	0.393362		r	NE	1	1 <= CBD < 2	Succession Class E	313	Mechanical Remove	Low	Upland Forest	10270	Mediterranean California Dry-Mesic Mixed Conifer Forest and Woodland	116	Ponderosa Pine-Incense Cedar-1	Conifer	106	Tree Cover >= 60 and < 70%	2	Oregon Coastal Range	1000	Mediterranean California Dry-Mesic Mixed Conifer Forest and Woodland	5	Conifer	Conifer-Oak Forest and Woodland	SAF 246: California Black Oak	Tree-dominated	Open tree canopy	250 <= CH < 500	Tr Mediterranean California Lower Montane Conifer Forest and Woodland	Tree	Evergreen open tree canopy	60 <= CC < 70	No	Conifer
KBOINVENAPPLEGATE BACE_13	1012.73	110.311	1716.54	18.459	0.796589	1572.51	21.97	8.45	15	25	52	23	1917	0.52759		i	E	5	5 <= CBD < 6	Succession Class A	0	No Disturbance	NA	Upland Woodland	10320	Mediterranean California Red Fir Forest	121	Red Fir-1	Conifer	101	Tree Cover >= 10 and < 20%	2	Oregon Coastal Range	1000	Mediterranean California Red Fir Forest	4	Conifer	Red Fir Forest and Woodland	SAF 207: Red Fir	Tree-dominated	Open tree canopy	0 < CH < 50	Tr Mediterranean California Red Fir Forest	Tree	Evergreen open tree canopy	10 <= CC < 20	No	Conifer
KBOINVENAPPLEGATE BAD_05	571.981	116.909	1914.3	9.58921	0.424541	921.2	24.14	12.1375	35	175	68	13	1488	0.897265		m	S	6	6 <= CBD < 7	Succession Class C	0	No Disturbance	NA	Upland Woodland	10270	Mediterranean California Dry-Mesic Mixed Conifer Forest and Woodland	116	Ponderosa Pine-Incense Cedar-1	Conifer	103	Tree Cover >= 30 and < 40%	2	Oregon Coastal Range	1000	Mediterranean California Dry-Mesic Mixed Conifer Forest and Woodland	4	Conifer	Douglas-fir-Ponderosa Pine-Lodgepole Pine Forest and Woodland	SAF 243: Sierra Nevada Mixed Conifer	Tree-dominated	Open tree canopy	100 <= CH < 250	Tr Mediterranean California Dry-Mesic Mixed Conifer Forest and Woodland	Tree	Evergreen open tree canopy	30 <= CC < 40	No	Conifer
KBOINVENAPPLEGATE BEAB_10	927.758	108.428	1758.59	10.5353	0.808216	683.07	27.17	13.9975	45	25	68	21	849	0.458657		s	NE	1	1 <= CBD < 2	Succession Class A	0	No Disturbance	NA	Upland Forest	10270	Mediterranean California Dry-Mesic Mixed Conifer Forest and Woodland	116	Ponderosa Pine-Incense Cedar-1	Conifer	104	Tree Cover >= 40 and < 50%	2	Oregon Coastal Range	1000	Mediterranean California Dry-Mesic Mixed Conifer Forest and Woodland	5	Conifer	Conifer-Oak Forest and Woodland	SAF 246: California Black Oak	Tree-dominated	Open tree canopy	0 < CH < 50	Tr Mediterranean California Lower Montane Conifer Forest and Woodland	Tree	Evergreen open tree canopy	40 <= CC < 50	No	Mixed
KBOINVENAPPLEGATE BRA_15	360.299	109.86	2195.03	9.8448	0.139943	827.24	24.68	12.9325	0	0	75	29	1299	1.03194		r	W	0	Non-Forested	Succession Class A	0	No Disturbance	NA	Upland Forest	10270	Mediterranean California Dry-Mesic Mixed Conifer Forest and Woodland	116	Ponderosa Pine-Incense Cedar-1	Conifer	104	Tree Cover >= 40 and < 50%	2	Oregon Coastal Range	1000	Mediterranean California Dry-Mesic Mixed Conifer Forest and Woodland	5	Conifer	Douglas-fir-Ponderosa Pine-Lodgepole Pine Forest and Woodland	SAF 243: Sierra Nevada Mixed Conifer	Tree-dominated	Open tree canopy	Non-Forested	Tr Mediterranean California Dry-Mesic Mixed Conifer Forest and Woodland	Tree	Evergreen open tree canopy	Non-Forested	No	Conifer
KBOINVENAPPLEGATE BRUC_09	273.409	101.359	189.316	2.9225	0.122092	595.52	29.1	15.49	35	25	65	3	498	0.706122		r	NE	9	9 <= CBD < 10	Succession Class A	0	No Disturbance	NA	Upland Woodland	10270	Mediterranean California Dry-Mesic Mixed Conifer Forest and Woodland	116	Ponderosa Pine-Incense Cedar-1	Conifer	103	Tree Cover >= 30 and < 40%	2	Oregon Coastal Range	1000	Mediterranean California Dry-Mesic Mixed Conifer Forest and Woodland	4	Conifer	California Mixed Evergreen Forest and Woodland	SAF 234: Douglas-Fir-Tanoak-Pacific Madrone	Tree-dominated	Closed tree canopy	0 < CH < 50	Tr Mediterranean California Mixed Evergreen Forest	Tree	Evergreen closed tree canopy	30 <= CC < 40	No	Conifer
KBOINVENAPPLEGATE CAFA_04	248.665	114.544	883.216	10.7641	0.228869	834.87	25.63	12.9925	0	0	84	25	1141	0.975376		r	SW	0	Non-Forested	Succession Class A	0	No Disturbance	NA	Upland Forest	10270	Mediterranean California Dry-Mesic Mixed Conifer Forest and Woodland	116	Ponderosa Pine-Incense Cedar-1	Conifer	104	Tree Cover >= 40 and < 50%	2	Oregon Coastal Range	1000	Mediterranean California Dry-Mesic Mixed Conifer Forest and Woodland	5	Conifer	Douglas-fir-Ponderosa Pine-Lodgepole Pine Forest and Woodland	SAF 243: Sierra Nevada Mixed Conifer	Tree-dominated	Open tree canopy	Non-Forested	Tr Mediterranean California Dry-Mesic Mixed Conifer Forest and Woodland	Tree	Evergreen open tree canopy	Non-Forested	No	Conifer
KBOINVENAPPLEGATE CAFA_16	517.004	115.609	2216.22	9.02222	0.178838	968.85	24.11	11.0375	45	375	77	29	1420	1.04803		r	W	6	6 <= CBD < 7	Succession Class D	0	No Disturbance	NA	Upland Forest	10270	Mediterranean California Dry-Mesic Mixed Conifer Forest and Woodland	116	Ponderosa Pine-Incense Cedar-1	Conifer	104	Tree Cover >= 40 and < 50%	2	Oregon Coastal Range	1000	Mediterranean California Dry-Mesic Mixed Conifer Forest and Woodland	5	Conifer	Douglas-fir-Ponderosa Pine-Lodgepole Pine Forest and Woodland	SAF 243: Sierra Nevada Mixed Conifer	Tree-dominated	Open tree canopy	250 <= CH < 500	Tr Mediterranean California Dry-Mesic Mixed Conifer Forest and Woodland	Tree	Evergreen open tree canopy	40 <= CC < 50	No	Conifer
KBOINVENAPPLEGATE CANT_13	304.1	108.149	1848.4	10.4988	0.214499	654.79	27.68	15.22	0	0	73	8	768	0.849547		z	SW	0	Non-Forested	Succession Class A	0	No Disturbance	NA	Upland Woodland	10270	Mediterranean California Dry-Mesic Mixed Conifer Forest and Woodland	116	Ponderosa Pine-Incense Cedar-1	Conifer	103	Tree Cover >= 30 and < 40%	2	Oregon Coastal Range	1000	Mediterranean California Dry-Mesic Mixed Conifer Forest and Woodland	4	Conifer	Douglas-fir-Ponderosa Pine-Lodgepole Pine Forest and Woodland	SAF 243: Sierra Nevada Mixed Conifer	Tree-dominated	Open tree canopy	Non-Forested	Tr Mediterranean California Dry-Mesic Mixed Conifer Forest and Woodland	Tree	Evergreen open tree canopy	Non-Forested	No	Mixed
KBOINVENAPPLEGATE CRAP_06	98.022	106.484	3686.93	13.3433	0.019988	930.91	25.43	13.2275	75	175	93	10	1237	0.653337		r	E	22	22 <= CBD < 23	Succession Class B	0	No Disturbance	NA	Upland Forest	10270	Mediterranean California Dry-Mesic Mixed Conifer Forest and Woodland	116	Ponderosa Pine-Incense Cedar-1	Conifer	107	Tree Cover >= 70 and < 80%	2	Oregon Coastal Range	1000	Mediterranean California Dry-Mesic Mixed Conifer Forest and Woodland	5	Conifer	Douglas-fir-Ponderosa Pine-Lodgepole Pine Forest and Woodland	SAF 243: Sierra Nevada Mixed Conifer	Tree-dominated	Open tree canopy	100 <= CH < 250	Tr Mediterranean California Dry-Mesic Mixed Conifer Forest and Woodland	Tree	Evergreen open tree canopy	70 <= CC < 80	No	Conifer
KBOINVENAPPLEGATE DEMA_02	277.314	105.29	544.08	6.9918	0.04137	634.7	27.57	14.4025	65	375	77	21	865	0.462235		z	NE	12	12 <= CBD < 13	Succession Class E	0	No Disturbance	NA	Upland Forest	10270	Mediterranean California Dry-Mesic Mixed Conifer Forest and Woodland	116	Ponderosa Pine-Incense Cedar-1	Conifer	106	Tree Cover >= 60 and < 70%	2	Oregon Coastal Range	1000	Mediterranean California Dry-Mesic Mixed Conifer Forest and Woodland	5	Conifer	California Mixed Evergreen Forest and Woodland	SAF 234: Douglas-Fir-Tanoak-Pacific Madrone	Tree-dominated	Closed tree canopy	250 <= CH < 500	Tr Mediterranean California Mixed Evergreen Forest	Tree	Evergreen closed tree canopy	60 <= CC < 70	No	Mixed
KBOINVENAPPLEGATE DEMA_03	115.627	105.653	611.489	7.34283	0.152544	652.75	27.63	14.3825	65	375	77	15	771	0.56868		r	NE	12	12 <= CBD < 13	Succession Class E	0	No Disturbance	NA	Upland Forest	10270	Mediterranean California Dry-Mesic Mixed Conifer Forest and Woodland	116	Ponderosa Pine-Incense Cedar-1	Conifer	106	Tree Cover >= 60 and < 70%	2	Oregon Coastal Range	1000	Mediterranean California Dry-Mesic Mixed Conifer Forest and Woodland	5	Conifer	California Mixed Evergreen Forest and Woodland	SAF 234: Douglas-Fir-Tanoak-Pacific Madrone	Tree-dominated	Closed tree canopy	250 <= CH < 500	Tr Mediterranean California Mixed Evergreen Forest	Tree	Evergreen closed tree canopy	60 <= CC < 70	No	Conifer
KBOINVENAPPLEGATE DEMA_16	903.105	107.845	1922.67	9.45381	0.202578	714.17	25.86	14.1075	75	375	73	33	962	0.354399		m	NE	16	16 <= CBD < 17	Succession Class E	213	Mechanical Add	Low	Upland Forest	10270	Mediterranean California Dry-Mesic Mixed Conifer Forest and Woodland	116	Ponderosa Pine-Incense Cedar-1	Conifer	107	Tree Cover >= 70 and < 80%	2	Oregon Coastal Range	1000	Mediterranean California Dry-Mesic Mixed Conifer Forest and Woodland	5	Conifer	Douglas-fir Forest and Woodland	SAF 229: Pacific Douglas-Fir	Tree-dominated	Closed tree canopy	250 <= CH < 500	Tr North Pacific Dry Douglas-fir(-Madrone) Forest and Woodland	Tree	Evergreen closed tree canopy	70 <= CC < 80	No	Conifer
KBOINVENAPPLEGATE DOPR_01	107.759	107.154	3429.41	13.128	-0.003196	789.4	27.17	13.6125	0	0	92	19	996	0.900495		r	NW	0	Non-Forested	Succession Class A	0	No Disturbance	NA	Upland Forest	10270	Mediterranean California Dry-Mesic Mixed Conifer Forest and Woodland	116	Ponderosa Pine-Incense Cedar-1	Conifer	104	Tree Cover >= 40 and < 50%	2	Oregon Coastal Range	1000	Mediterranean California Dry-Mesic Mixed Conifer Forest and Woodland	5	Conifer	Douglas-fir Forest and Woodland	SAF 229: Pacific Douglas-Fir	Tree-dominated	Closed tree canopy	Non-Forested	Tr North Pacific Dry Douglas-fir(-Madrone) Forest and Woodland	Tree	Evergreen closed tree canopy	Non-Forested	No	Conifer
KBOINVENAPPLEGATE DOPR_06	231.412	107.826	3103.49	14.1482	0.044086	986.62	25.39	12.9975	75	375	81	21	1177	0.996455		r	W	16	16 <= CBD < 17	Succession Class E	0	No Disturbance	NA	Upland Forest	10280	Mediterranean California Mesic Mixed Conifer Forest and Woodland	117	Douglas Fir-White Fir-Sugar Pine-1	Conifer	107	Tree Cover >= 70 and < 80%	2	Oregon Coastal Range	1000	Mediterranean California Mesic Mixed Conifer Forest and Woodland	5	Conifer	Douglas-fir-Ponderosa Pine-Lodgepole Pine Forest and Woodland	SAF 243: Sierra Nevada Mixed Conifer	Tree-dominated	Open tree canopy	250 <= CH < 500	Tr Mediterranean California Dry-Mesic Mixed Conifer Forest and Woodland	Tree	Evergreen open tree canopy	70 <= CC < 80	No	Conifer
KBOINVENAPPLEGATE DOPR_09	411.591	108.132	3059.71	14.3429	0.016639	944.4	26.07	12.8675	65	375	81	18	1240	0.871772		r	NW	12	12 <= CBD < 13	Succession Class E	0	No Disturbance	NA	Upland Forest	10280	Mediterranean California Mesic Mixed Conifer Forest and Woodland	117	Douglas Fir-White Fir-Sugar Pine-1	Conifer	106	Tree Cover >= 60 and < 70%	2	Oregon Coastal Range	1000	Mediterranean California Mesic Mixed Conifer Forest and Woodland	5	Conifer	Douglas-fir Forest and Woodland	SAF 229: Pacific Douglas-Fir	Tree-dominated	Closed tree canopy	250 <= CH < 500	Tr North Pacific Dry Douglas-fir(-Madrone) Forest and Woodland	Tree	Evergreen closed tree canopy	60 <= CC < 70	No	Conifer
KBOINVENAPPLEGATE DUTA_10	428.331	108.346	644.472	9.28087	0.248886	753.73	25.59	14.2625	65	375	84	37	1049	0.538823		x	N	12	12 <= CBD < 13	Succession Class E	0	No Disturbance	NA	Upland Forest	10270	Mediterranean California Dry-Mesic Mixed Conifer Forest and Woodland	116	Ponderosa Pine-Incense Cedar-1	Conifer	106	Tree Cover >= 60 and < 70%	2	Oregon Coastal Range	1000	Mediterranean California Dry-Mesic Mixed Conifer Forest and Woodland	5	Conifer	Douglas-fir-Western Hemlock Forest and Woodland	SAF 230: Douglas-Fir-Western Hemlock	Tree-dominated	Closed tree canopy	250 <= CH < 500	Tr North Pacific Maritime Dry-Mesic Douglas-fir-Western Hemlock Forest	Tree	Evergreen closed tree canopy	60 <= CC < 70	No	Conifer
KBOINVENAPPLEGATE FWGU_12	903.656	114.69	1636.32	9.09599	0.033891	859.64	24.62	12.35	0	0	96	24	1295	1.01772		m	S	0	Non-Forested	Succession Class A	0	No Disturbance	NA	Upland Forest	10270	Mediterranean California Dry-Mesic Mixed Conifer Forest and Woodland	116	Ponderosa Pine-Incense Cedar-1	Conifer	104	Tree Cover >= 40 and < 50%	2	Oregon Coastal Range	1000	Mediterranean California Dry-Mesic Mixed Conifer Forest and Woodland	5	Conifer	Douglas-fir Forest and Woodland	SAF 229: Pacific Douglas-Fir	Tree-dominated	Closed tree canopy	Non-Forested	Tr North Pacific Dry Douglas-fir(-Madrone) Forest and Woodland	Tree	Evergreen closed tree canopy	Non-Forested	No	Conifer
KBOINVENAPPLEGATE GILA_02	260.861	105.524	482.555	6.89361	0.006832	632.87	28.8	14.7975	0	0	72	13	701	0.828098		r	SE	0	Non-Forested	Non-burnable Urban	113	Fire	Low	Undetermined	10290	Mediterranean California Mixed Oak Woodland	118	Oregon White Oak-Romers Fescue-Oatgrass-1	Hardwood	25	Developed-Roads	2	Oregon Coastal Range	1000	Mediterranean California Mixed Oak Woodland	0	Developed-Roads	Developed-Roads	No Dominant Lifeform	No Dominant Lifeform	No Dominant Lifeform	Non-Forested	Bau Developed-Roads	Developed	Developed	Non-Forested	No	Conifer
KBOINVENAPPLEGATE GILA_05	149.312	106.633	410.893	7.46717	0.132517	662.78	27.95	14.4725	0	0	68	25	788	0.517071		s	E	0	Non-Forested	Succession Class A	212	Mechanical Add	Low	Upland Forest	10270	Mediterranean California Dry-Mesic Mixed Conifer Forest and Woodland	116	Ponderosa Pine-Incense Cedar-1	Conifer	104	Tree Cover >= 40 and < 50%	2	Oregon Coastal Range	1000	Mediterranean California Dry-Mesic Mixed Conifer Forest and Woodland	5	Conifer	Douglas-fir-Ponderosa Pine-Lodgepole Pine Forest and Woodland	SAF 243: Sierra Nevada Mixed Conifer	Tree-dominated	Open tree canopy	Non-Forested	Tr Mediterranean California Dry-Mesic Mixed Conifer Forest and Woodland	Tree	Evergreen open tree canopy	Non-Forested	No	Mixed
KBOINVENAPPLEGATE GILA_11	164.393	108.3	648.79	6.73505	0.145675	708.09	26.05	14.51	65	375	78	8	887	0.712365		z	E	12	12 <= CBD < 13	Succession Class E	0	No Disturbance	NA	Upland Forest	10270	Mediterranean California Dry-Mesic Mixed Conifer Forest and Woodland	116	Ponderosa Pine-Incense Cedar-1	Conifer	106	Tree Cover >= 60 and < 70%	2	Oregon Coastal Range	1000	Mediterranean California Dry-Mesic Mixed Conifer Forest and Woodland	5	Conifer	California Mixed Evergreen Forest and Woodland	SAF 234: Douglas-Fir-Tanoak-Pacific Madrone	Tree-dominated	Closed tree canopy	250 <= CH < 500	Tr Mediterranean California Mixed Evergreen Forest	Tree	Evergreen closed tree canopy	60 <= CC < 70	No	Mixed
KBOINVENAPPLEGATE GLA2_06	105.643	110.989	1295.93	18.1304	0.697427	1332.78	23.34	10.02	45	175	73	26	1661	0.489768		x	E	8	8 <= CBD < 9	Succession Class C	0	No Disturbance	NA	Wetland Forest	10280	Mediterranean California Mesic Mixed Conifer Forest and Woodland	117	Douglas Fir-White Fir-Sugar Pine-1	Conifer	104	Tree Cover >= 40 and < 50%	2	Oregon Coastal Range	1000	Mediterranean California Mesic Mixed Conifer Forest and Woodland	7	Conifer	Douglas-fir-Grand Fir-White Fir Forest and Woodland	SAF 211: White Fir	Tree-dominated	Closed tree canopy	100 <= CH < 250	Tr Mediterranean California Mesic Mixed Conifer Forest and Woodland	Tree	Evergreen closed tree canopy	40 <= CC < 50	No	Conifer
KBOINVENAPPLEGATE GLA2_08	335.793	110.715	1060.17	17.7525	0.59118	1332.78	22.13	9.895	45	375	73	22	1701	0.468347		m	NE	6	6 <= CBD < 7	Succession Class B	0	No Disturbance	NA	Upland Forest	10320	Mediterranean California Red Fir Forest	121	Red Fir-1	Conifer	104	Tree Cover >= 40 and < 50%	2	Oregon Coastal Range	1000	Mediterranean California Red Fir Forest	5	Conifer	Douglas-fir-Grand Fir-White Fir Forest and Woodland	SAF 211: White Fir	Tree-dominated	Closed tree canopy	250 <= CH < 500	Tr Mediterranean California Mesic Mixed Conifer Forest and Woodland	Tree	Evergreen closed tree canopy	40 <= CC < 50	No	Conifer
KBOINVENAPPLEGATE GLA2_11	373.112	110.767	1426.17	17.4705	0.190272	1264.21	21.37	10.735	45	375	75	27	1727	0.71432		m	SE	6	6 <= CBD < 7	Succession Class D	0	No Disturbance	NA	Upland Forest	10280	Mediterranean California Mesic Mixed Conifer Forest and Woodland	117	Douglas Fir-White Fir-Sugar Pine-1	Conifer	104	Tree Cover >= 40 and < 50%	2	Oregon Coastal Range	1000	Mediterranean California Mesic Mixed Conifer Forest and Woodland	5	Conifer	Douglas-fir-Grand Fir-White Fir Forest and Woodland	SAF 211: White Fir	Tree-dominated	Closed tree canopy	250 <= CH < 500	Tr Mediterranean California Mesic Mixed Conifer Forest and Woodland	Tree	Evergreen closed tree canopy	40 <= CC < 50	No	Conifer
KBOINVENAPPLEGATE GLAD_03	656.786	110.029	1389.79	18.0956	0.824415	1572.51	21.97	8.45	0	0	52	17	1962	0.656758		m	E	0	Non-Forested	Succession Class A	0	No Disturbance	NA	Upland Woodland	10320	Mediterranean California Red Fir Forest	121	Red Fir-1	Conifer	101	Tree Cover >= 10 and < 20%	2	Oregon Coastal Range	1000	Mediterranean California Red Fir Forest	4	Conifer	Douglas-fir-Grand Fir-White Fir Forest and Woodland	SAF 211: White Fir	Tree-dominated	Closed tree canopy	Non-Forested	Tr Mediterranean California Mesic Mixed Conifer Forest and Woodland	Tree	Evergreen closed tree canopy	Non-Forested	No	Conifer
KBOINVENAPPLEGATE GROA_03	131.981	101.498	1630.34	4.17873	0.211366	648.05	28.42	15.48	65	375	78	30	671	0.550514		r	E	12	12 <= CBD < 13	Succession Class C	0	No Disturbance	NA	Upland Forest	10430	Mediterranean California Mixed Evergreen Forest	133	Douglas Fir-Tanoak-Pacific Madrone-1	Conifer	106	Tree Cover >= 60 and < 70%	2	Oregon Coastal Range	1000	Mediterranean California Mixed Evergreen Forest	5	Conifer	California Mixed Evergreen Forest and Woodland	SAF 234: Douglas-Fir-Tanoak-Pacific Madrone	Tree-dominated	Closed tree canopy	250 <= CH < 500	Tr Mediterranean California Mixed Evergreen Forest	Tree	Evergreen closed tree canopy	60 <= CC < 70	No	Conifer
KBOINVENAPPLEGATE GROA_07	16.356	100.933	2743.94	4.27908	-0.0001	670.69	27.58	14.7625	65	375	94	4	769	0.750046		m	E	12	12 <= CBD < 13	Succession Class E	0	No Disturbance	NA	Upland Forest	10270	Mediterranean California Dry-Mesic Mixed Conifer Forest and Woodland	116	Ponderosa Pine-Incense Cedar-1	Conifer	106	Tree Cover >= 60 and < 70%	2	Oregon Coastal Range	1000	Mediterranean California Dry-Mesic Mixed Conifer Forest and Woodland	5	Conifer	Douglas-fir-Ponderosa Pine-Lodgepole Pine Forest and Woodland	SAF 243: Sierra Nevada Mixed Conifer	Tree-dominated	Open tree canopy	250 <= CH < 500	Tr Mediterranean California Dry-Mesic Mixed Conifer Forest and Woodland	Tree	Evergreen open tree canopy	60 <= CC < 70	No	Conifer
KBOINVENAPPLEGATE GRUB_02	870.492	109.665	869.466	7.20831	0.167445	791.95	25.68	14.17	75	175	86	20	996	0.511958		r	NE	22	22 <= CBD < 23	Succession Class B	0	No Disturbance	NA	Upland Forest	10270	Mediterranean California Dry-Mesic Mixed Conifer Forest and Woodland	116	Ponderosa Pine-Incense Cedar-1	Conifer	107	Tree Cover >= 70 and < 80%	2	Oregon Coastal Range	1000	Mediterranean California Dry-Mesic Mixed Conifer Forest and Woodland	5	Conifer	California Mixed Evergreen Forest and Woodland	SAF 234: Douglas-Fir-Tanoak-Pacific Madrone	Tree-dominated	Closed tree canopy	100 <= CH < 250	Tr Mediterranean California Mixed Evergreen Forest	Tree	Evergreen closed tree canopy	70 <= CC < 80	No	Conifer
KBOINVENAPPLEGATE GRUB_04	388.55	110.212	1345.02	6.88433	0.119881	791.95	25.52	14.125	65	175	82	16	960	0.592236		r	N	16	16 <= CBD < 17	Succession Class B	0	No Disturbance	NA	Upland Forest	10270	Mediterranean California Dry-Mesic Mixed Conifer Forest and Woodland	116	Ponderosa Pine-Incense Cedar-1	Conifer	106	Tree Cover >= 60 and < 70%	2	Oregon Coastal Range	1000	Mediterranean California Dry-Mesic Mixed Conifer Forest and Woodland	5	Conifer	Douglas-fir Forest and Woodland	SAF 229: Pacific Douglas-Fir	Tree-dominated	Closed tree canopy	100 <= CH < 250	Tr North Pacific Dry Douglas-fir(-Madrone) Forest and Woodland	Tree	Evergreen closed tree canopy	60 <= CC < 70	No	Conifer
KBOINVENAPPLEGATE GRUB_09	1212.79	110.357	741.235	8.26608	0.057945	845.41	24.25	12.5875	35	175	84	25	1256	0.666263		r	E	6	6 <= CBD < 7	Succession Class C	0	No Disturbance	NA	Upland Woodland	10270	Mediterranean California Dry-Mesic Mixed Conifer Forest and Woodland	116	Ponderosa Pine-Incense Cedar-1	Conifer	103	Tree Cover >= 30 and < 40%	2	Oregon Coastal Range	1000	Mediterranean California Dry-Mesic Mixed Conifer Forest and Woodland	4	Conifer	Douglas-fir-Ponderosa Pine-Lodgepole Pine Forest and Woodland	SAF 243: Sierra Nevada Mixed Conifer	Tree-dominated	Open tree canopy	100 <= CH < 250	Tr Mediterranean California Dry-Mesic Mixed Conifer Forest and Woodland	Tree	Evergreen open tree canopy	30 <= CC < 40	No	Conifer
KBOINVENAPPLEGATE GRUB_17	365.395	110.869	1906.71	8.56851	0.01404	870.44	24.27	11.8925	35	175	87	21	1539	0.756603		m	SE	6	6 <= CBD < 7	Succession Class C	213	Mechanical Add	Low	Upland Woodland	10280	Mediterranean California Mesic Mixed Conifer Forest and Woodland	117	Douglas Fir-White Fir-Sugar Pine-1	Conifer	103	Tree Cover >= 30 and < 40%	2	Oregon Coastal Range	1000	Mediterranean California Mesic Mixed Conifer Forest and Woodland	4	Conifer	Douglas-fir-Grand Fir-White Fir Forest and Woodland	SAF 211: White Fir	Tree-dominated	Closed tree canopy	100 <= CH < 250	Tr Mediterranean California Mesic Mixed Conifer Forest and Woodland	Tree	Evergreen closed tree canopy	30 <= CC < 40	No	Conifer
KBOINVENAPPLEGATE HIKE_03	391.059	117.88	2003.17	10.692	0.21141	1198.19	23.32	9.96	45	375	77	20	1648	0.704296		m	NW	6	6 <= CBD < 7	Succession Class D	0	No Disturbance	NA	Upland Forest	10280	Mediterranean California Mesic Mixed Conifer Forest and Woodland	117	Douglas Fir-White Fir-Sugar Pine-1	Conifer	104	Tree Cover >= 40 and < 50%	2	Oregon Coastal Range	1000	Mediterranean California Mesic Mixed Conifer Forest and Woodland	5	Conifer	Douglas-fir-Grand Fir-White Fir Forest and Woodland	SAF 211: White Fir	Tree-dominated	Closed tree canopy	250 <= CH < 500	Tr Mediterranean California Mesic Mixed Conifer Forest and Woodland	Tree	Evergreen closed tree canopy	40 <= CC < 50	No	Conifer
KBOINVENAPPLEGATE HIKE_07	227.663	118.165	1606.31	10.9273	0.294905	1294.48	24.3	8.925	45	175	73	21	1706	0.919392		m	NW	8	8 <= CBD < 9	Succession Class B	0	No Disturbance	NA	Upland Forest	10320	Mediterranean California Red Fir Forest	121	Red Fir-1	Conifer	104	Tree Cover >= 40 and < 50%	2	Oregon Coastal Range	1000	Mediterranean California Red Fir Forest	5	Conifer	Douglas-fir-Grand Fir-White Fir Forest and Woodland	SAF 211: White Fir	Tree-dominated	Closed tree canopy	100 <= CH < 250	Tr Mediterranean California Mesic Mixed Conifer Forest and Woodland	Tree	Evergreen closed tree canopy	40 <= CC < 50	No	Conifer
KBOINVENAPPLEGATE HIKE_14	499.434	118.897	1201.97	11.1742	0.731966	1347.01	22	7.7125	0	0	82	16	1973	0.931391		m	SW	0	Non-Forested	Succession Class A	0	No Disturbance	NA	Upland Forest	10320	Mediterranean California Red Fir Forest	121	Red Fir-1	Conifer	103	Tree Cover >= 30 and < 40%	2	Oregon Coastal Range	1000	Mediterranean California Red Fir Forest	5	Conifer	Douglas-fir-Grand Fir-White Fir Forest and Woodland	SAF 211: White Fir	Tree-dominated	Closed tree canopy	Non-Forested	Tr Mediterranean California Mesic Mixed Conifer Forest and Woodland	Tree	Evergreen closed tree canopy	Non-Forested	No	Conifer
KBOINVENAPPLEGATE HUKA_12	606.81	105.743	804.51	6.80425	0.100703	637.5	28.22	14.6275	0	0	60	9	744	0.846836		r	S	0	Non-Forested	Succession Class C	0	No Disturbance	NA	Upland Herb	10300	Mediterranean California Lower Montane Black Oak-Conifer Forest and Woodland	119	Ponderosa Pine-California Black Oak-1	Conifer	122	Herb Cover >= 20 and < 30%	2	Oregon Coastal Range	1000	Mediterranean California Dry-Mesic Mixed Conifer Forest and Woodland	2	Grassland	Grassland	SRM 102: Idaho Fescue	Herbaceous / Nonvascular-dominated	Herbaceous - grassland	Non-Forested	He North Pacific Montane Grassland	Herb	Perennial graminoid grassland	Non-Forested	No	Conifer
KBOINVENAPPLEGATE LAG_11	181.331	115.679	566.331	15.9255	0.047489	1156.62	24.42	11.5575	45	375	80	25	1416	0.516227		m	N	6	6 <= CBD < 7	Succession Class D	0	No Disturbance	NA	Upland Forest	10280	Mediterranean California Mesic Mixed Conifer Forest and Woodland	117	Douglas Fir-White Fir-Sugar Pine-1	Conifer	104	Tree Cover >= 40 and < 50%	2	Oregon Coastal Range	1000	Mediterranean California Mesic Mixed Conifer Forest and Woodland	5	Conifer	California Mixed Evergreen Forest and Woodland	SAF 234: Douglas-Fir-Tanoak-Pacific Madrone	Tree-dominated	Closed tree canopy	250 <= CH < 500	Tr Mediterranean California Mixed Evergreen Forest	Tree	Evergreen closed tree canopy	40 <= CC < 50	No	Conifer
KBOINVENAPPLEGATE LAG_15	12.635	115.675	629.691	15.6259	0.028696	1156.62	24.42	11.5575	45	375	90	13	1316	0.819076		m	SE	6	6 <= CBD < 7	Burnable Urban	0	No Disturbance	NA	Upland Forest	11520	California Montane Riparian Systems	249	Black Cottonwood-Arroyo Willow-Madrone-3	Riparian	14	Developed-Upland Evergreen Forest	2	Oregon Coastal Range	1200	California Montane Riparian Systems	5	Developed	Developed-Upland Evergreen Forest	LF 20: Developed	Tree-dominated	Open tree canopy	250 <= CH < 500	Dtc Urban Evergreen Forest	Tree	Evergreen open tree canopy	40 <= CC < 50	No	Conifer
KBOINVENAPPLEGATE MCDO_04	243.261	119.753	1224.63	12.174	0.304166	1454.33	21.89	7.9325	45	175	44	20	1955	0.950791		n	SW	8	8 <= CBD < 9	Succession Class B	0	No Disturbance	NA	Upland Forest	10320	Mediterranean California Red Fir Forest	121	Red Fir-1	Conifer	104	Tree Cover >= 40 and < 50%	2	Oregon Coastal Range	1000	Mediterranean California Red Fir Forest	5	Conifer	Red Fir Forest and Woodland	SAF 207: Red Fir	Tree-dominated	Open tree canopy	100 <= CH < 250	Tr Mediterranean California Red Fir Forest	Tree	Evergreen open tree canopy	40 <= CC < 50	No	Conifer
KBOINVENAPPLEGATE MCDO_08	145.782	120.06	991.322	12.0488	0.100567	1535.68	21.91	7.8225	25	75	44	16	1950	0.944176		n	W	6	6 <= CBD < 7	Succession Class A	0	No Disturbance	NA	Wetland Shrub	10320	Mediterranean California Red Fir Forest	121	Red Fir-1	Conifer	102	Tree Cover >= 20 and < 30%	2	Oregon Coastal Range	1000	Mediterranean California Red Fir Forest	8	Conifer	Douglas-fir-Grand Fir-White Fir Forest and Woodland	SAF 211: White Fir	Tree-dominated	Closed tree canopy	50 <= CH < 100	Tr Mediterranean California Mesic Mixed Conifer Forest and Woodland	Tree	Evergreen closed tree canopy	20 <= CC < 30	No	Conifer
KBOINVENAPPLEGATE MEAD_01	1196.16	109.238	1617.71	9.74598	0.050312	794.84	25.34	13.6625	45	175	84	31	1160	0.343462		r	NE	8	8 <= CBD < 9	Succession Class C	0	No Disturbance	NA	Upland Forest	10270	Mediterranean California Dry-Mesic Mixed Conifer Forest and Woodland	116	Ponderosa Pine-Incense Cedar-1	Conifer	104	Tree Cover >= 40 and < 50%	2	Oregon Coastal Range	1000	Mediterranean California Dry-Mesic Mixed Conifer Forest and Woodland	5	Conifer	California Mixed Evergreen Forest and Woodland	SAF 234: Douglas-Fir-Tanoak-Pacific Madrone	Tree-dominated	Closed tree canopy	100 <= CH < 250	Tr Mediterranean California Mixed Evergreen Forest	Tree	Evergreen closed tree canopy	40 <= CC < 50	No	Conifer
KBOINVENAPPLEGATE MUDD_06	1107.11	111.51	721.632	9.23503	0.453115	800.77	24.78	12.8825	35	375	62	30	1160	0.579349		r	E	5	5 <= CBD < 6	Succession Class D	0	No Disturbance	NA	Upland Woodland	10270	Mediterranean California Dry-Mesic Mixed Conifer Forest and Woodland	116	Ponderosa Pine-Incense Cedar-1	Conifer	103	Tree Cover >= 30 and < 40%	2	Oregon Coastal Range	1000	Mediterranean California Dry-Mesic Mixed Conifer Forest and Woodland	4	Conifer	Douglas-fir-Ponderosa Pine-Lodgepole Pine Forest and Woodland	SAF 243: Sierra Nevada Mixed Conifer	Tree-dominated	Open tree canopy	250 <= CH < 500	Tr Mediterranean California Dry-Mesic Mixed Conifer Forest and Woodland	Tree	Evergreen open tree canopy	30 <= CC < 40	No	Conifer
KBOINVENAPPLEGATE QRA_08	292.529	105.85	2102.52	11.0996	0.167712	698.04	26.58	13.91	55	175	89	9	994	0.823955		r	NW	11	11 <= CBD < 12	Succession Class C	0	No Disturbance	NA	Upland Forest	10270	Mediterranean California Dry-Mesic Mixed Conifer Forest and Woodland	116	Ponderosa Pine-Incense Cedar-1	Conifer	105	Tree Cover >= 50 and < 60%	2	Oregon Coastal Range	1000	Mediterranean California Dry-Mesic Mixed Conifer Forest and Woodland	5	Conifer	Douglas-fir-Ponderosa Pine-Lodgepole Pine Forest and Woodland	SAF 243: Sierra Nevada Mixed Conifer	Tree-dominated	Open tree canopy	100 <= CH < 250	Tr Mediterranean California Dry-Mesic Mixed Conifer Forest and Woodland	Tree	Evergreen open tree canopy	50 <= CC < 60	No	Conifer
KBOINVENAPPLEGATE RUSH_03	139.979	112.298	774.872	10.4883	0.106436	728.41	27.53	14.1175	65	375	55	30	931	0.706328		r	SE	1	1 <= CBD < 2	Succession Class E	0	No Disturbance	NA	Upland Forest	10270	Mediterranean California Dry-Mesic Mixed Conifer Forest and Woodland	116	Ponderosa Pine-Incense Cedar-1	Conifer	106	Tree Cover >= 60 and < 70%	2	Oregon Coastal Range	1000	Mediterranean California Dry-Mesic Mixed Conifer Forest and Woodland	5	Conifer	Conifer-Oak Forest and Woodland	SAF 246: California Black Oak	Tree-dominated	Open tree canopy	250 <= CH < 500	Tr Mediterranean California Lower Montane Conifer Forest and Woodland	Tree	Evergreen open tree canopy	60 <= CC < 70	No	Conifer
KBOINVENAPPLEGATE RUSH_12	837.48	114.038	362.407	7.78111	-0.003608	825.51	24.56	12.6175	45	175	81	15	1298	0.922632		r	W	8	8 <= CBD < 9	Succession Class C	0	No Disturbance	NA	Upland Forest	10270	Mediterranean California Dry-Mesic Mixed Conifer Forest and Woodland	116	Ponderosa Pine-Incense Cedar-1	Conifer	104	Tree Cover >= 40 and < 50%	2	Oregon Coastal Range	1000	Mediterranean California Dry-Mesic Mixed Conifer Forest and Woodland	5	Conifer	Douglas-fir-Ponderosa Pine-Lodgepole Pine Forest and Woodland	SAF 243: Sierra Nevada Mixed Conifer	Tree-dominated	Open tree canopy	100 <= CH < 250	Tr Mediterranean California Dry-Mesic Mixed Conifer Forest and Woodland	Tree	Evergreen open tree canopy	40 <= CC < 50	No	Conifer
KBOINVENAPPLEGATE SALL_06	118.237	108.86	903.153	16.1008	0.174338	1329.12	23.24	9.6	0	0	75	21	1599	0.875412		x	NW	0	Non-Forested	Succession Class A	0	No Disturbance	NA	Upland Forest	10280	Mediterranean California Mesic Mixed Conifer Forest and Woodland	117	Douglas Fir-White Fir-Sugar Pine-1	Conifer	103	Tree Cover >= 30 and < 40%	2	Oregon Coastal Range	1000	Mediterranean California Mesic Mixed Conifer Forest and Woodland	5	Conifer	Douglas-fir-Grand Fir-White Fir Forest and Woodland	SAF 211: White Fir	Tree-dominated	Closed tree canopy	Non-Forested	Tr Mediterranean California Mesic Mixed Conifer Forest and Woodland	Tree	Evergreen closed tree canopy	Non-Forested	No	Conifer
KBOINVENAPPLEGATE SALL_09	17.893	108.965	680.697	16.4433	0.070591	1329.12	23.24	9.6	45	375	67	18	1687	0.665257		r	N	6	6 <= CBD < 7	Succession Class D	0	No Disturbance	NA	Upland Forest	10280	Mediterranean California Mesic Mixed Conifer Forest and Woodland	117	Douglas Fir-White Fir-Sugar Pine-1	Conifer	104	Tree Cover >= 40 and < 50%	2	Oregon Coastal Range	1000	Mediterranean California Mesic Mixed Conifer Forest and Woodland	5	Conifer	Douglas-fir-Grand Fir-White Fir Forest and Woodland	SAF 211: White Fir	Tree-dominated	Closed tree canopy	250 <= CH < 500	Tr Mediterranean California Mesic Mixed Conifer Forest and Woodland	Tree	Evergreen closed tree canopy	40 <= CC < 50	No	Conifer
KBOINVENAPPLEGATE STEA_08	700.865	107.22	2339.16	9.06998	0.196547	687.53	25.69	13.9075	55	175	76	26	898	0.572833		r	E	11	11 <= CBD < 12	Succession Class C	0	No Disturbance	NA	Upland Forest	10270	Mediterranean California Dry-Mesic Mixed Conifer Forest and Woodland	116	Ponderosa Pine-Incense Cedar-1	Conifer	105	Tree Cover >= 50 and < 60%	2	Oregon Coastal Range	1000	Mediterranean California Dry-Mesic Mixed Conifer Forest and Woodland	5	Conifer	Douglas-fir-Ponderosa Pine-Lodgepole Pine Forest and Woodland	SAF 243: Sierra Nevada Mixed Conifer	Tree-dominated	Open tree canopy	100 <= CH < 250	Tr Mediterranean California Dry-Mesic Mixed Conifer Forest and Woodland	Tree	Evergreen open tree canopy	50 <= CC < 60	No	Conifer
KBOINVENAPPLEGATE TUNA_10	300.693	110.284	295.863	10.7205	0.250933	732.69	26.51	14.0125	65	375	67	24	870	0.506001		r	E	12	12 <= CBD < 13	Succession Class E	0	No Disturbance	NA	Upland Forest	10270	Mediterranean California Dry-Mesic Mixed Conifer Forest and Woodland	116	Ponderosa Pine-Incense Cedar-1	Conifer	106	Tree Cover >= 60 and < 70%	2	Oregon Coastal Range	1000	Mediterranean California Dry-Mesic Mixed Conifer Forest and Woodland	5	Conifer	Douglas-fir Forest and Woodland	SAF 229: Pacific Douglas-Fir	Tree-dominated	Closed tree canopy	250 <= CH < 500	Tr North Pacific Dry Douglas-fir(-Madrone) Forest and Woodland	Tree	Evergreen closed tree canopy	60 <= CC < 70	No	Conifer
KBOINVENAPPLEGATE TUNA_15	524.532	110.877	562.023	10.7359	0.56315	713.85	26.79	13.76	0	0	67	18	974	0.941368		n	SW	0	Non-Forested	Succession Class A	0	No Disturbance	NA	Upland Woodland	10270	Mediterranean California Dry-Mesic Mixed Conifer Forest and Woodland	116	Ponderosa Pine-Incense Cedar-1	Conifer	102	Tree Cover >= 20 and < 30%	2	Oregon Coastal Range	1000	Mediterranean California Dry-Mesic Mixed Conifer Forest and Woodland	4	Conifer	Conifer-Oak Forest and Woodland	SAF 246: California Black Oak	Tree-dominated	Open tree canopy	Non-Forested	Tr Mediterranean California Lower Montane Conifer Forest and Woodland	Tree	Evergreen open tree canopy	Non-Forested	No	Conifer
KBOINVENAPPLEGATE WAGB_09	552.575	118.499	1682.25	9.73822	0.786928	1254.94	22.23	8.9525	45	375	76	20	1770	0.988839		m	W	6	6 <= CBD < 7	Succession Class D	0	No Disturbance	NA	Upland Forest	10280	Mediterranean California Mesic Mixed Conifer Forest and Woodland	117	Douglas Fir-White Fir-Sugar Pine-1	Conifer	104	Tree Cover >= 40 and < 50%	2	Oregon Coastal Range	1000	Mediterranean California Mesic Mixed Conifer Forest and Woodland	5	Conifer	Douglas-fir-Grand Fir-White Fir Forest and Woodland	SAF 211: White Fir	Tree-dominated	Closed tree canopy	250 <= CH < 500	Tr Mediterranean California Mesic Mixed Conifer Forest and Woodland	Tree	Evergreen closed tree canopy	40 <= CC < 50	No	Conifer
KBOINVENAPPLEGATE WOLF_02	13.077	107.267	2361.79	9.54363	0.013453	652.94	28.03	15.285	45	175	59	8	716	0.770151		s	SE	8	8 <= CBD < 9	Succession Class C	0	No Disturbance	NA	Upland Woodland	10270	Mediterranean California Dry-Mesic Mixed Conifer Forest and Woodland	116	Ponderosa Pine-Incense Cedar-1	Conifer	104	Tree Cover >= 40 and < 50%	2	Oregon Coastal Range	1000	Mediterranean California Dry-Mesic Mixed Conifer Forest and Woodland	4	Conifer	Douglas-fir-Ponderosa Pine-Lodgepole Pine Forest and Woodland	SAF 243: Sierra Nevada Mixed Conifer	Tree-dominated	Open tree canopy	100 <= CH < 250	Tr Mediterranean California Dry-Mesic Mixed Conifer Forest and Woodland	Tree	Evergreen open tree canopy	40 <= CC < 50	No	Mixed
KBOINVENAPPLEGATE WOLF_07	280.852	107.608	2588.98	9.70188	0.272962	674.29	27.28	14	45	25	68	20	868	0.986444		r	W	1	1 <= CBD < 2	Succession Class A	0	No Disturbance	NA	Upland Forest	10270	Mediterranean California Dry-Mesic Mixed Conifer Forest and Woodland	116	Ponderosa Pine-Incense Cedar-1	Conifer	104	Tree Cover >= 40 and < 50%	2	Oregon Coastal Range	1000	Mediterranean California Dry-Mesic Mixed Conifer Forest and Woodland	5	Conifer	Conifer-Oak Forest and Woodland	SAF 246: California Black Oak	Tree-dominated	Open tree canopy	0 < CH < 50	Tr Mediterranean California Lower Montane Conifer Forest and Woodland	Tree	Evergreen open tree canopy	40 <= CC < 50	No	Conifer
KBOINVENAPPLEGATE YACR_05	136.628	107.873	1772.95	15.5312	0.683135	1232.08	23.57	11.6775	45	375	77	22	1499	0.849902		r	NW	6	6 <= CBD < 7	Succession Class D	0	No Disturbance	NA	Upland Forest	10280	Mediterranean California Mesic Mixed Conifer Forest and Woodland	117	Douglas Fir-White Fir-Sugar Pine-1	Conifer	104	Tree Cover >= 40 and < 50%	2	Oregon Coastal Range	1000	Mediterranean California Mesic Mixed Conifer Forest and Woodland	5	Conifer	Douglas-fir-Grand Fir-White Fir Forest and Woodland	SAF 211: White Fir	Tree-dominated	Closed tree canopy	250 <= CH < 500	Tr Mediterranean California Mesic Mixed Conifer Forest and Woodland	Tree	Evergreen closed tree canopy	40 <= CC < 50	No	Conifer
KBOINVENAPPLEGATE YALE_12	339.777	104.415	484.972	7.26427	0.448768	621.05	29.22	15.3425	15	25	74	11	634	0.872669		s	SW	5	5 <= CBD < 6	Succession Class A	0	No Disturbance	NA	Upland Woodland	10270	Mediterranean California Dry-Mesic Mixed Conifer Forest and Woodland	116	Ponderosa Pine-Incense Cedar-1	Conifer	101	Tree Cover >= 10 and < 20%	2	Oregon Coastal Range	1000	Mediterranean California Dry-Mesic Mixed Conifer Forest and Woodland	4	Conifer	California Mixed Evergreen Forest and Woodland	SAF 234: Douglas-Fir-Tanoak-Pacific Madrone	Tree-dominated	Closed tree canopy	0 < CH < 50	Tr Mediterranean California Mixed Evergreen Forest	Tree	Evergreen closed tree canopy	10 <= CC < 20	No	Mixed
KBOINVENKLMNCRATERLACL01_07	235.588	190.415	1284.42	0.684105	0.691604	966.66	27.24	6.8575	55	175	56	13	2057	0.731699		d	SE	11	11 <= CBD < 12	Succession Class B	0	No Disturbance	NA	Upland Woodland	11670	Rocky Mountain Poor-Site Lodgepole Pine Forest	266	Lodgepole Pine-Kinnikinnick-4	Conifer	105	Tree Cover >= 50 and < 60%	7	Cascade Mountain Range	1000	North Pacific Mountain Hemlock Forest	4	Conifer	Lodgepole Pine Forest and Woodland	SAF 218: Lodgepole Pine	Tree-dominated	Closed tree canopy	100 <= CH < 250	Tr Sierra Nevada Subalpine Lodgepole Pine Forest and Woodland	Tree	Evergreen closed tree canopy	50 <= CC < 60	CRLA	Conifer
KBOINVENKLMNCRATERLACL01_10	245.971	189.783	617.791	0.042426	0.046531	973.17	26.92	6.2725	55	175	35	5	2147	0.711824		m	E	11	11 <= CBD < 12	Succession Class B	0	No Disturbance	NA	Upland Woodland	10320	Mediterranean California Red Fir Forest	121	Red Fir-1	Conifer	105	Tree Cover >= 50 and < 60%	7	Cascade Mountain Range	1000	North Pacific Mountain Hemlock Forest	4	Conifer	Mountain Hemlock Forest and Woodland	SAF 205: Mountain Hemlock	Tree-dominated	Open tree canopy	100 <= CH < 250	Tr Northern California Mesic Subalpine Woodland	Tree	Evergreen open tree canopy	50 <= CC < 60	CRLA	Conifer
KBOINVENKLMNCRATERLACL02_07	892.863	186.02	2239.23	0.6	0.016689	1560.47	25.95	8.5275	55	175	62	6	1801	0.721917		m	E	11	11 <= CBD < 12	Succession Class D	0	No Disturbance	NA	Upland Forest	10412	North Pacific Mountain Hemlock Forest - Xeric	131	Mountain Hemlock-Huckleberry-5	Conifer	105	Tree Cover >= 50 and < 60%	7	Cascade Mountain Range	1000	North Pacific Mountain Hemlock Forest	5	Conifer	Mountain Hemlock Forest and Woodland	SAF 205: Mountain Hemlock	Tree-dominated	Closed tree canopy	100 <= CH < 250	Tr North Pacific Mountain Hemlock Forest	Tree	Evergreen closed tree canopy	50 <= CC < 60	CRLA	Conifer
KBOINVENKLMNCRATERLACL04_03	65.913	177.034	3092.18	0.3	0.303371	1673.24	26.39	9.1425	75	375	54	34	1649	0.328504		m	NE	16	16 <= CBD < 17	Succession Class B	0	No Disturbance	NA	Upland Forest	10320	Mediterranean California Red Fir Forest	121	Red Fir-1	Conifer	107	Tree Cover >= 70 and < 80%	7	Cascade Mountain Range	1000	North Pacific Mountain Hemlock Forest	5	Conifer	Mountain Hemlock Forest and Woodland	SAF 205: Mountain Hemlock	Tree-dominated	Open tree canopy	250 <= CH < 500	Tr Northern California Mesic Subalpine Woodland	Tree	Evergreen open tree canopy	70 <= CC < 80	CRLA	Conifer
KBOINVENKLMNCRATERLACL04_09	123.701	177.225	3139.78	0.492037	0.494733	1679.67	26.33	8.9225	55	375	64	6	1672	0.829371		m	SW	9	9 <= CBD < 10	Succession Class B	0	No Disturbance	NA	Upland Forest	10320	Mediterranean California Red Fir Forest	121	Red Fir-1	Conifer	105	Tree Cover >= 50 and < 60%	7	Cascade Mountain Range	1000	Mediterranean California Red Fir Forest	5	Conifer	Red Fir Forest and Woodland	SAF 207: Red Fir	Tree-dominated	Open tree canopy	250 <= CH < 500	Tr Mediterranean California Red Fir Forest	Tree	Evergreen open tree canopy	50 <= CC < 60	CRLA	Conifer
KBOINVENKLMNCRATERLACL11_02	94.477	195.035	7494.6	5.28017	0.233401	1112.02	27.4	9.22	55	175	51	1	1716	0.775666		m	S	11	11 <= CBD < 12	Succession Class B	0	No Disturbance	NA	Upland Forest	10320	Mediterranean California Red Fir Forest	121	Red Fir-1	Conifer	105	Tree Cover >= 50 and < 60%	7	Cascade Mountain Range	1000	Mediterranean California Red Fir Forest	5	Conifer	Douglas-fir-Ponderosa Pine-Lodgepole Pine Forest and Woodland	SAF 218: Lodgepole Pine	Tree-dominated	Open tree canopy	100 <= CH < 250	Tr North Pacific Wooded Volcanic Flowage	Tree	Evergreen open tree canopy	50 <= CC < 60	CRLA	Conifer
KBOINVENKLMNCRATERLACL14_09	526.148	182.584	919.357	0.408044	0.411069	1662.19	26.04	6.085	0	0	19	3	2079	0.799004		d	W	0	Non-Forested	Barren	0	No Disturbance	NA	Undetermined	31	Barren-Rock/Sand/Clay	31	Barren-Rock/Sand/Clay	Barren-Rock/Sand/Cl*	31	Barren	7	Cascade Mountain Range	31	Barren-Rock/Sand/Clay	0	Barren	Barren	Non-vegetated	Non-vegetated	Non-vegetated	Non-Forested	Bab Barren	Barren	Non-vegetated	Non-Forested	CRLA	Conifer
KBOINVENKLMNCRATERLACL15_08	408.001	176.925	3408.49	3.76198	3.76208	1655.17	26.18	8.415	65	375	56	6	1761	0.837834		m	SW	12	12 <= CBD < 13	Succession Class E	0	No Disturbance	NA	Upland Forest	10412	North Pacific Mountain Hemlock Forest - Xeric	131	Mountain Hemlock-Huckleberry-5	Conifer	106	Tree Cover >= 60 and < 70%	7	Cascade Mountain Range	1000	North Pacific Mountain Hemlock Forest	5	Conifer	Mountain Hemlock Forest and Woodland	SAF 205: Mountain Hemlock	Tree-dominated	Closed tree canopy	250 <= CH < 500	Tr North Pacific Mountain Hemlock Forest	Tree	Evergreen closed tree canopy	60 <= CC < 70	CRLA	Conifer
KBOINVENKLMNCRATERLACL26_03	91.588	186.331	10860.5	0.32311	0.323458	1012.48	29.12	8.9325	15	175	43	6	1670	0.701718		m	E	3	3 <= CBD < 4	Succession Class C	122	Fire	Moderate	Upland Woodland	11670	Rocky Mountain Poor-Site Lodgepole Pine Forest	266	Lodgepole Pine-Kinnikinnick-4	Conifer	101	Tree Cover >= 10 and < 20%	7	Cascade Mountain Range	1000	Mediterranean California Red Fir Forest	4	Conifer	Lodgepole Pine Forest and Woodland	SAF 218: Lodgepole Pine	Tree-dominated	Closed tree canopy	100 <= CH < 250	Tr Sierra Nevada Subalpine Lodgepole Pine Forest and Woodland	Tree	Evergreen closed tree canopy	10 <= CC < 20	CRLA	Conifer
KBOINVENKLMNCRATERLACL28_02	2910.08	180.302	901.418	0.349857	0.358353	1760.15	26.4	5.3575	0	0	0	6	2172	0.747796		m	N	0	Non-Forested	Barren	0	No Disturbance	NA	Undetermined	31	Barren-Rock/Sand/Clay	31	Barren-Rock/Sand/Clay	Barren-Rock/Sand/Cl*	31	Barren	7	Cascade Mountain Range	31	Barren-Rock/Sand/Clay	0	Barren	Barren	Non-vegetated	Non-vegetated	Non-vegetated	Non-Forested	Bab Barren	Barren	Non-vegetated	Non-Forested	CRLA	Conifer
KBOINVENKLMNCRATERLACL28_05	2484.2	179.702	1619.83	0.823772	0.831527	1724.29	26.18	5.965	0	0	0	4	2106	0.807112		i	SW	0	Non-Forested	Barren	0	No Disturbance	NA	Undetermined	31	Barren-Rock/Sand/Clay	31	Barren-Rock/Sand/Clay	Barren-Rock/Sand/Cl*	31	Barren	7	Cascade Mountain Range	31	Barren-Rock/Sand/Clay	0	Barren	Barren	Non-vegetated	Non-vegetated	Non-vegetated	Non-Forested	Bab Barren	Barren	Non-vegetated	Non-Forested	CRLA	Conifer
KBOINVENKLMNCRATERLACRLA_08	975.577	192.248	2846	1.23	1.2435	1142.99	25.12	5.7425	0	0	6	15	2562	0.812127		m	SE	0	Non-Forested	Barren	0	No Disturbance	NA	Undetermined	31	Barren-Rock/Sand/Clay	31	Barren-Rock/Sand/Clay	Barren-Rock/Sand/Cl*	31	Barren	7	Cascade Mountain Range	31	Barren-Rock/Sand/Clay	0	Barren	Barren	Non-vegetated	Non-vegetated	Non-vegetated	Non-Forested	Bab Barren	Barren	Non-vegetated	Non-Forested	CRLA	Conifer
KBOINVENKLMNCRATERLALSTH_05	239.834	179.78	1268.13	0.442945	0.437592	1738.43	26.53	5.655	55	375	0	4	2079	0.782851		m	NW	9	9 <= CBD < 10	Succession Class D	0	No Disturbance	NA	Upland Forest	10412	North Pacific Mountain Hemlock Forest - Xeric	131	Mountain Hemlock-Huckleberry-5	Conifer	105	Tree Cover >= 50 and < 60%	7	Cascade Mountain Range	1000	North Pacific Mountain Hemlock Forest	5	Conifer	Mountain Hemlock Forest and Woodland	SAF 205: Mountain Hemlock	Tree-dominated	Closed tree canopy	250 <= CH < 500	Tr North Pacific Mountain Hemlock Forest	Tree	Evergreen closed tree canopy	50 <= CC < 60	CRLA	Conifer
KBOINVENKLMNLAVABEDSCAN1_12	1302.02	212.802	2916.98	30.9936	30.9835	304.91	30.12	12.57	0	0	23	0	1244	0.759238		ag	SW	0	Non-Forested	Uncharacteristic Exotic Vegetation	112	Fire	Low	Upland Shrub	11250	Inter-Mountain Basins Big Sagebrush Steppe	220	Wyoming Big Sage-Wheatgrass-3	Shrubland	125	Herb Cover >= 50 and < 60%	7	Cascade Mountain Range	1100	Inter-Mountain Basins Big Sagebrush Steppe	3	Exotic Herbaceous	Introduced Annual Grassland	LF 54: Introduced Upland Vegetation - Herbaceous	Herbaceous / Nonvascular-dominated	Herbaceous - grassland	Non-Forested	He Introduced Upland Vegetation-Annual Grassland	Herb	Annual Graminoid/Forb	Non-Forested	LABE	Shrubland
KBOINVENKLMNLAVABEDSCBU1_08	13359.3	215.619	11052.5	29.1365	27.9541	401.16	28.5	13.13	35	175	41	15	1492	0.617588		s	N	6	6 <= CBD < 7	Succession Class B	113	Fire	Low	Upland Forest	10310	California Montane Jeffrey Pine(-Ponderosa Pine) Woodland	120	Jeffrey Pine-1	Conifer	103	Tree Cover >= 30 and < 40%	7	Cascade Mountain Range	1100	Northern Rocky Mountain Ponderosa Pine Woodland and Savanna	5	Conifer	Ponderosa Pine Forest, Woodland and Savanna	SAF 237: Interior Ponderosa Pine	Tree-dominated	Open tree canopy	100 <= CH < 250	Tr Northern Rocky Mountain Ponderosa Pine Woodland and Savanna	Tree	Evergreen open tree canopy	30 <= CC < 40	LABE	Mixed
KBOINVENKLMNLAVABEDSCLDA_02	11641	214.958	10442.9	28.6583	27.7586	390.05	28.73	13.07	0	0	26	6	1472	0.721917		ag	E	0	Non-Forested	Uncharacteristic Exotic Vegetation	113	Fire	Low	Upland Shrub	11250	Inter-Mountain Basins Big Sagebrush Steppe	220	Wyoming Big Sage-Wheatgrass-3	Shrubland	125	Herb Cover >= 50 and < 60%	7	Cascade Mountain Range	1100	Inter-Mountain Basins Big Sagebrush Shrubland	3	Exotic Herbaceous	Introduced Annual Grassland	LF 54: Introduced Upland Vegetation - Herbaceous	Herbaceous / Nonvascular-dominated	Herbaceous - grassland	Non-Forested	He Introduced Upland Vegetation-Annual Grassland	Herb	Annual Graminoid/Forb	Non-Forested	LABE	Shrubland
KBOINVENKLMNLAVABEDSCLDB_09	11710.2	214.158	9614.01	27.8255	26.8948	440.03	28.34	13.01	0	0	26	2	1538	0.742882		ag	E	0	Non-Forested	Uncharacteristic Exotic Vegetation	113	Fire	Low	Upland Shrub	11250	Inter-Mountain Basins Big Sagebrush Steppe	220	Wyoming Big Sage-Wheatgrass-3	Shrubland	125	Herb Cover >= 50 and < 60%	7	Cascade Mountain Range	1100	Inter-Mountain Basins Big Sagebrush Shrubland	3	Exotic Herbaceous	Introduced Annual Grassland	LF 54: Introduced Upland Vegetation - Herbaceous	Herbaceous / Nonvascular-dominated	Herbaceous - grassland	Non-Forested	He Introduced Upland Vegetation-Annual Grassland	Herb	Annual Graminoid/Forb	Non-Forested	LABE	Shrubland
KBOINVENKLMNLAVABEDSCLDC_08	12200.8	213.613	9038.52	27.1948	26.158	440.03	28.2	12.975	0	0	30	0	1549	0.754787		ag	E	0	Non-Forested	Uncharacteristic Exotic Vegetation	113	Fire	Low	Upland Shrub	10170	Columbia Plateau Western Juniper Woodland and Savanna	108	Western Juniper-Low Sage-3	Conifer	125	Herb Cover >= 50 and < 60%	7	Cascade Mountain Range	1000	Columbia Plateau Western Juniper Woodland and Savanna	3	Exotic Herbaceous	Introduced Annual Grassland	LF 54: Introduced Upland Vegetation - Herbaceous	Herbaceous / Nonvascular-dominated	Herbaceous - grassland	Non-Forested	He Introduced Upland Vegetation-Annual Grassland	Herb	Annual Graminoid/Forb	Non-Forested	LABE	Shrubland
KBOINVENKLMNLAVABEDSDEV1_02	2292.24	212.951	3166.85	29.6659	29.6539	303.58	30.18	12.64	0	0	22	1	1263	0.769308		ag	NW	0	Non-Forested	Uncharacteristic Exotic Vegetation	112	Fire	Low	Upland Shrub	10170	Columbia Plateau Western Juniper Woodland and Savanna	108	Western Juniper-Low Sage-3	Conifer	125	Herb Cover >= 50 and < 60%	7	Cascade Mountain Range	1000	Columbia Plateau Western Juniper Woodland and Savanna	3	Exotic Herbaceous	Introduced Annual Grassland	LF 54: Introduced Upland Vegetation - Herbaceous	Herbaceous / Nonvascular-dominated	Herbaceous - grassland	Non-Forested	He Introduced Upland Vegetation-Annual Grassland	Herb	Annual Graminoid/Forb	Non-Forested	LABE	Shrubland
KBOINVENKLMNLAVABEDSDEV1_09	2396.22	212.247	2605.07	28.6935	28.6812	308.69	30.17	12.675	0	0	9	1	1269	0.744852		ag	E	0	Non-Forested	Uncharacteristic Exotic Vegetation	112	Fire	Low	Upland Shrub	10170	Columbia Plateau Western Juniper Woodland and Savanna	108	Western Juniper-Low Sage-3	Conifer	125	Herb Cover >= 50 and < 60%	7	Cascade Mountain Range	1000	Columbia Plateau Western Juniper Woodland and Savanna	3	Exotic Herbaceous	Introduced Annual Grassland	LF 54: Introduced Upland Vegetation - Herbaceous	Herbaceous / Nonvascular-dominated	Herbaceous - grassland	Non-Forested	He Introduced Upland Vegetation-Annual Grassland	Herb	Annual Graminoid/Forb	Non-Forested	LABE	Shrubland
KBOINVENKLMNLAVABEDSDEV2_04	2663.04	213.715	3891.82	31.2535	31.2425	299.62	30.16	12.59	0	0	23	0	1246	0.759409		ag	SE	0	Non-Forested	Uncharacteristic Exotic Vegetation	112	Fire	Low	Upland Shrub	11250	Inter-Mountain Basins Big Sagebrush Steppe	220	Wyoming Big Sage-Wheatgrass-3	Shrubland	125	Herb Cover >= 50 and < 60%	7	Cascade Mountain Range	1100	Inter-Mountain Basins Big Sagebrush Shrubland	3	Exotic Herbaceous	Introduced Annual Grassland	LF 54: Introduced Upland Vegetation - Herbaceous	Herbaceous / Nonvascular-dominated	Herbaceous - grassland	Non-Forested	He Introduced Upland Vegetation-Annual Grassland	Herb	Annual Graminoid/Forb	Non-Forested	LABE	Shrubland
KBOINVENKLMNLAVABEDSHRD1_02	4331.49	213.416	4341.64	29.1051	29.0405	311	30.1	12.705	0	0	19	3	1301	0.714072		ag	NE	0	Non-Forested	Uncharacteristic Exotic Vegetation	112	Fire	Low	Upland Shrub	11250	Inter-Mountain Basins Big Sagebrush Steppe	220	Wyoming Big Sage-Wheatgrass-3	Shrubland	125	Herb Cover >= 50 and < 60%	7	Cascade Mountain Range	1100	Inter-Mountain Basins Big Sagebrush Shrubland	3	Exotic Herbaceous	Introduced Annual Grassland	LF 54: Introduced Upland Vegetation - Herbaceous	Herbaceous / Nonvascular-dominated	Herbaceous - grassland	Non-Forested	He Introduced Upland Vegetation-Annual Grassland	Herb	Annual Graminoid/Forb	Non-Forested	LABE	Shrubland
KBOINVENKLMNLAVABEDSHRD1_12	4390.75	213.082	4221.09	28.6769	28.6089	318.71	29.9	12.7825	0	0	22	3	1320	0.722711		ag	E	0	Non-Forested	Uncharacteristic Exotic Vegetation	112	Fire	Low	Upland Shrub	11250	Inter-Mountain Basins Big Sagebrush Steppe	220	Wyoming Big Sage-Wheatgrass-3	Shrubland	125	Herb Cover >= 50 and < 60%	7	Cascade Mountain Range	1100	Inter-Mountain Basins Big Sagebrush Shrubland	3	Exotic Herbaceous	Introduced Annual Grassland	LF 54: Introduced Upland Vegetation - Herbaceous	Herbaceous / Nonvascular-dominated	Herbaceous - grassland	Non-Forested	He Introduced Upland Vegetation-Annual Grassland	Herb	Annual Graminoid/Forb	Non-Forested	LABE	Shrubland
KBOINVENKLMNLAVABEDSNLB2_01	7966.94	219.776	862.752	37.4067	37.3949	294.88	30.09	12.5575	0	0	21	1	1239	0.779573		ag	S	0	Non-Forested	Uncharacteristic Exotic Vegetation	311	Mechanical Remove	Low	Upland Shrub	10170	Columbia Plateau Western Juniper Woodland and Savanna	108	Western Juniper-Low Sage-3	Conifer	125	Herb Cover >= 50 and < 60%	7	Cascade Mountain Range	1000	Columbia Plateau Western Juniper Woodland and Savanna	3	Exotic Herbaceous	Introduced Annual Grassland	LF 54: Introduced Upland Vegetation - Herbaceous	Herbaceous / Nonvascular-dominated	Herbaceous - grassland	Non-Forested	He Introduced Upland Vegetation-Annual Grassland	Herb	Annual Graminoid/Forb	Non-Forested	LABE	Shrubland
KBOINVENKLMNLAVABEDSNLB3_05	8212.85	219.657	2918.24	36.3262	36.2884	300.15	30.12	12.625	0	0	20	1	1260	0.761274		ag	SE	0	Non-Forested	Succession Class C	0	No Disturbance	NA	Upland Shrub	11250	Inter-Mountain Basins Big Sagebrush Steppe	220	Wyoming Big Sage-Wheatgrass-3	Shrubland	112	Shrub Cover >= 20 and < 30%	7	Cascade Mountain Range	1100	Inter-Mountain Basins Big Sagebrush Shrubland	3	Shrubland	Big Sagebrush Shrubland and Steppe	SRM 403: Wyoming Big Sagebrush	Shrub-dominated	Shrubland	Non-Forested	Sh Inter-Mountain Basins Big Sagebrush Shrubland	Shrub	Evergreen shrubland	Non-Forested	LABE	Shrubland
KBOINVENKLMNLAVABEDSNLB3_10	7675.56	219.021	3059.05	35.6502	35.6133	299.92	30.12	12.6175	0	0	17	3	1260	0.736629		ag	E	0	Non-Forested	Succession Class C	0	No Disturbance	NA	Upland Shrub	11250	Inter-Mountain Basins Big Sagebrush Steppe	220	Wyoming Big Sage-Wheatgrass-3	Shrubland	112	Shrub Cover >= 20 and < 30%	7	Cascade Mountain Range	1100	Inter-Mountain Basins Big Sagebrush Shrubland	3	Shrubland	Big Sagebrush Shrubland and Steppe	SRM 403: Wyoming Big Sagebrush	Shrub-dominated	Shrubland	Non-Forested	Sh Inter-Mountain Basins Big Sagebrush Shrubland	Shrub	Evergreen shrubland	Non-Forested	LABE	Shrubland
KBOINVENKLMNLAVABEDSRAB1_05	3555.91	214.517	4720.94	31.2258	31.2136	301.04	30.2	12.615	0	0	14	0	1256	0.7556		ah	Flat	0	Non-Forested	Uncharacteristic Exotic Vegetation	112	Fire	Low	Upland Shrub	10170	Columbia Plateau Western Juniper Woodland and Savanna	108	Western Juniper-Low Sage-3	Conifer	125	Herb Cover >= 50 and < 60%	7	Cascade Mountain Range	1000	Columbia Plateau Western Juniper Woodland and Savanna	3	Exotic Herbaceous	Introduced Annual Grassland	LF 54: Introduced Upland Vegetation - Herbaceous	Herbaceous / Nonvascular-dominated	Herbaceous - grassland	Non-Forested	He Introduced Upland Vegetation-Annual Grassland	Herb	Annual Graminoid/Forb	Non-Forested	LABE	Shrubland
KBOINVENKLMNLAVABEDSSCRA_11	5835.03	212.304	5105.52	27.3025	27.1499	343.32	29.5	12.925	0	0	19	4	1398	0.765992		ag	NW	0	Non-Forested	Succession Class C	0	No Disturbance	NA	Upland Shrub	11250	Inter-Mountain Basins Big Sagebrush Steppe	220	Wyoming Big Sage-Wheatgrass-3	Shrubland	112	Shrub Cover >= 20 and < 30%	7	Cascade Mountain Range	1100	Inter-Mountain Basins Big Sagebrush Shrubland	3	Shrubland	Big Sagebrush Shrubland and Steppe	SRM 403: Wyoming Big Sagebrush	Shrub-dominated	Shrubland	Non-Forested	Sh Inter-Mountain Basins Big Sagebrush Shrubland	Shrub	Evergreen shrubland	Non-Forested	LABE	Shrubland
KBOINVENKLMNLAVABEDSSEBO_02	13721.2	217.651	13076.8	31.1849	30.0344	349.44	29.58	12.9875	0	0	34	2	1368	0.721958		z	NE	0	Non-Forested	Succession Class B	0	No Disturbance	NA	Upland Shrub	11250	Inter-Mountain Basins Big Sagebrush Steppe	220	Wyoming Big Sage-Wheatgrass-3	Shrubland	111	Shrub Cover >= 10 and < 20%	7	Cascade Mountain Range	1000	Columbia Plateau Western Juniper Woodland and Savanna	3	Shrubland	Big Sagebrush Shrubland and Steppe	SRM 403: Wyoming Big Sagebrush	Shrub-dominated	Shrubland	Non-Forested	Sh Inter-Mountain Basins Big Sagebrush Shrubland	Shrub	Evergreen shrubland	Non-Forested	LABE	Mixed
KBOINVENKLMNLAVABEDSSISA_01	10189.2	216.467	9960.3	30.5426	29.9329	325.84	29.93	12.87	0	0	25	3	1350	0.722711		ag	N	0	Non-Forested	Succession Class B	0	No Disturbance	NA	Upland Shrub	10170	Columbia Plateau Western Juniper Woodland and Savanna	108	Western Juniper-Low Sage-3	Conifer	113	Shrub Cover >= 30 and < 40%	7	Cascade Mountain Range	1000	Columbia Plateau Western Juniper Woodland and Savanna	3	Shrubland	Big Sagebrush Shrubland and Steppe	SRM 403: Wyoming Big Sagebrush	Shrub-dominated	Shrubland	Non-Forested	Sh Inter-Mountain Basins Big Sagebrush Shrubland	Shrub	Evergreen shrubland	Non-Forested	LABE	Shrubland
KBOINVENKLMNLAVABEDSSISA_10	9724.44	216.894	9655.72	31.1271	30.6152	318.75	29.92	12.86	0	0	24	0	1342	0.745235		ah	NE	0	Non-Forested	Succession Class B	0	No Disturbance	NA	Upland Shrub	10170	Columbia Plateau Western Juniper Woodland and Savanna	108	Western Juniper-Low Sage-3	Conifer	113	Shrub Cover >= 30 and < 40%	7	Cascade Mountain Range	1000	Columbia Plateau Western Juniper Woodland and Savanna	3	Shrubland	Big Sagebrush Shrubland and Steppe	SRM 403: Wyoming Big Sagebrush	Shrub-dominated	Shrubland	Non-Forested	Sh Inter-Mountain Basins Big Sagebrush Shrubland	Shrub	Evergreen shrubland	Non-Forested	LABE	Shrubland
KBOINVENKLMNLAVABEDSSISB_06	11181.7	218.649	10836.9	32.733	32.0961	316.88	30.12	12.8675	0	0	24	0	1321	0.750415		ag	NE	0	Non-Forested	Succession Class B	0	No Disturbance	NA	Upland Shrub	10170	Columbia Plateau Western Juniper Woodland and Savanna	108	Western Juniper-Low Sage-3	Conifer	113	Shrub Cover >= 30 and < 40%	7	Cascade Mountain Range	1000	Columbia Plateau Western Juniper Woodland and Savanna	3	Shrubland	Big Sagebrush Shrubland and Steppe	SRM 403: Wyoming Big Sagebrush	Shrub-dominated	Shrubland	Non-Forested	Sh Inter-Mountain Basins Big Sagebrush Shrubland	Shrub	Evergreen shrubland	Non-Forested	LABE	Shrubland
KBOINVENKLMNLAVABEDSTIN1_06	16682.3	220.392	9940.17	33.7613	32.1749	328.18	30.27	12.88	0	0	22	0	1325	0.754787		ag	N	0	Non-Forested	Succession Class C	0	No Disturbance	NA	Upland Shrub	11250	Inter-Mountain Basins Big Sagebrush Steppe	220	Wyoming Big Sage-Wheatgrass-3	Shrubland	112	Shrub Cover >= 20 and < 30%	7	Cascade Mountain Range	1100	Inter-Mountain Basins Big Sagebrush Shrubland	3	Shrubland	Big Sagebrush Shrubland and Steppe	SRM 403: Wyoming Big Sagebrush	Shrub-dominated	Shrubland	Non-Forested	Sh Inter-Mountain Basins Big Sagebrush Shrubland	Shrub	Evergreen shrubland	Non-Forested	No	Shrubland
KBOINVENKLMNLAVABEDSTIN2_03	14439.7	216.289	11573.3	29.7438	28.3949	409.7	28.92	13.0775	45	375	49	11	1456	0.691466		z	N	6	6 <= CBD < 7	Succession Class E	0	No Disturbance	NA	Upland Forest	10310	California Montane Jeffrey Pine(-Ponderosa Pine) Woodland	120	Jeffrey Pine-1	Conifer	104	Tree Cover >= 40 and < 50%	7	Cascade Mountain Range	1100	Northern Rocky Mountain Ponderosa Pine Woodland and Savanna	5	Conifer	Ponderosa Pine Forest, Woodland and Savanna	SAF 237: Interior Ponderosa Pine	Tree-dominated	Open tree canopy	250 <= CH < 500	Tr Northern Rocky Mountain Ponderosa Pine Woodland and Savanna	Tree	Evergreen open tree canopy	40 <= CC < 50	No	Mixed
KBOINVENKLMNLAVABEDSTIN2_06	14322.3	216.188	11034.9	29.5883	28.0964	462.54	28.32	13.0375	45	175	53	6	1502	0.674946		m	NE	8	8 <= CBD < 9	Succession Class C	0	No Disturbance	NA	Upland Forest	10270	Mediterranean California Dry-Mesic Mixed Conifer Forest and Woodland	116	Ponderosa Pine-Incense Cedar-1	Conifer	104	Tree Cover >= 40 and < 50%	7	Cascade Mountain Range	1000	Mediterranean California Dry-Mesic Mixed Conifer Forest and Woodland	5	Conifer	Douglas-fir-Ponderosa Pine-Lodgepole Pine Forest and Woodland	SAF 243: Sierra Nevada Mixed Conifer	Tree-dominated	Open tree canopy	100 <= CH < 250	Tr Mediterranean California Dry-Mesic Mixed Conifer Forest and Woodland	Tree	Evergreen open tree canopy	40 <= CC < 50	No	Conifer
KBOINVENKLMNLAVABEDSWHI1_08	5145.09	208.552	4435.38	23.8802	23.822	355.95	29.4	12.915	0	0	22	2	1420	0.71432		ag	NE	0	Non-Forested	Succession Class C	0	No Disturbance	NA	Upland Shrub	11260	Inter-Mountain Basins Montane Sagebrush Steppe	222	Mountain Sagebrush-Bluebunch Wheatgrass-Idaho Fes*	Shrubland	111	Shrub Cover >= 10 and < 20%	7	Cascade Mountain Range	1100	Inter-Mountain Basins Big Sagebrush Shrubland	3	Shrubland	Big Sagebrush Shrubland and Steppe	SRM 403: Wyoming Big Sagebrush	Shrub-dominated	Shrubland	Non-Forested	Sh Inter-Mountain Basins Big Sagebrush Shrubland	Shrub	Evergreen shrubland	Non-Forested	LABE	Shrubland
KBOINVENKLMNLAVABEDSWLB2_07	2843.56	208.347	2154.85	24.8018	24.7903	320.87	29.89	12.77	0	0	23	1	1352	0.741928		ag	E	0	Non-Forested	Succession Class B	0	No Disturbance	NA	Upland Shrub	10170	Columbia Plateau Western Juniper Woodland and Savanna	108	Western Juniper-Low Sage-3	Conifer	112	Shrub Cover >= 20 and < 30%	7	Cascade Mountain Range	1000	Columbia Plateau Western Juniper Woodland and Savanna	3	Shrubland	Big Sagebrush Shrubland and Steppe	SRM 403: Wyoming Big Sagebrush	Shrub-dominated	Shrubland	Non-Forested	Sh Inter-Mountain Basins Big Sagebrush Shrubland	Shrub	Evergreen shrubland	Non-Forested	LABE	Shrubland
KBOINVENKLMNOREGONCAORC_R3	225.204	67.5408	2013.72	0.417852	0.407962	1651.3	24.17	10.3475	45	375	85	24	1464	0.697576		f	NW	6	6 <= CBD < 7	Succession Class D	0	No Disturbance	NA	Wetland Shrub	10280	Mediterranean California Mesic Mixed Conifer Forest and Woodland	117	Douglas Fir-White Fir-Sugar Pine-1	Conifer	104	Tree Cover >= 40 and < 50%	2	Oregon Coastal Range	1000	Mediterranean California Mesic Mixed Conifer Forest and Woodland	8	Conifer	Red Fir Forest and Woodland	SAF 207: Red Fir	Tree-dominated	Open tree canopy	250 <= CH < 500	Tr Mediterranean California Red Fir Forest	Tree	Evergreen open tree canopy	40 <= CC < 50	ORCA	Mixed
KBOINVENKLMNOREGONCAORC_U1	343.691	67.876	1672.48	0.540833	0.334409	1651.3	24.17	10.3475	45	375	85	30	1592	0.710515		ac	NW	6	6 <= CBD < 7	Succession Class D	0	No Disturbance	NA	Upland Forest	10280	Mediterranean California Mesic Mixed Conifer Forest and Woodland	117	Douglas Fir-White Fir-Sugar Pine-1	Conifer	104	Tree Cover >= 40 and < 50%	2	Oregon Coastal Range	1000	Mediterranean California Mesic Mixed Conifer Forest and Woodland	5	Conifer	Douglas-fir-Grand Fir-White Fir Forest and Woodland	SAF 211: White Fir	Tree-dominated	Closed tree canopy	250 <= CH < 500	Tr Mediterranean California Mesic Mixed Conifer Forest and Woodland	Tree	Evergreen closed tree canopy	40 <= CC < 50	ORCA	Conifer
KBOINVENKLMNOREGONCAORCA_PC01	254.261	68.2205	1514.02	0.630714	0.597982	1656.43	24.1	11.155	45	375	81	21	1531	0.709557		i	NW	6	6 <= CBD < 7	Succession Class D	0	No Disturbance	NA	Upland Forest	10280	Mediterranean California Mesic Mixed Conifer Forest and Woodland	117	Douglas Fir-White Fir-Sugar Pine-1	Conifer	104	Tree Cover >= 40 and < 50%	2	Oregon Coastal Range	1000	Mediterranean California Mesic Mixed Conifer Forest and Woodland	5	Conifer	Douglas-fir-Grand Fir-White Fir Forest and Woodland	SAF 211: White Fir	Tree-dominated	Closed tree canopy	250 <= CH < 500	Tr Mediterranean California Mesic Mixed Conifer Forest and Woodland	Tree	Evergreen closed tree canopy	40 <= CC < 50	No	Conifer
KBOINVENKLMNREDWOODSBAHE_01	1107.39	10.8049	3140.72	4.02313	0.17622	2554.31	20.06	14.115	65	375	78	11	578	0.616271		m	NE	12	12 <= CBD < 13	Succession Class E	0	No Disturbance	NA	Upland Forest	10210	Klamath-Siskiyou Lower Montane Serpentine Mixed Conifer Woodland	112	Douglas Fir-Incense Cedar-1	Conifer	106	Tree Cover >= 60 and < 70%	3	Northern California Coastal Range	1000	Klamath-Siskiyou Lower Montane Serpentine Mixed Conifer Woodland	5	Conifer	Western Red-cedar-Western Hemlock Forest	SAF 231: Port Orford-Cedar	Tree-dominated	Open tree canopy	250 <= CH < 500	Tr Klamath-Siskiyou Lower Montane Serpentine Mixed Conifer Woodland	Tree	Evergreen open tree canopy	60 <= CC < 70	REDW	Conifer
KBOINVENKLMNREDWOODSBAHW_09	900.348	9.3293	4886.7	2.82781	0.180816	2468.38	18.26	13.6225	75	375	91	19	428	0.904391		ac	SE	16	16 <= CBD < 17	Succession Class C	0	No Disturbance	NA	Upland Woodland	10150	California Coastal Redwood Forest	106	Redwood-1	Conifer	107	Tree Cover >= 70 and < 80%	3	Northern California Coastal Range	1000	California Coastal Redwood Forest	4	Conifer	California Mixed Evergreen Forest and Woodland	SAF 234: Douglas-Fir-Tanoak-Pacific Madrone	Tree-dominated	Closed tree canopy	250 <= CH < 500	Tr Mediterranean California Mixed Evergreen Forest	Tree	Evergreen closed tree canopy	70 <= CC < 80	REDW	Conifer
KBOINVENKLMNREDWOODSCOTR_08	1680.74	0.185575	1920.44	1.80424	1.0346	1789.92	11.5	12.5875	75	175	58	20	134	0.919561		ac	W	22	22 <= CBD < 23	Succession Class C	0	No Disturbance	NA	Upland Forest	10150	California Coastal Redwood Forest	106	Redwood-1	Conifer	107	Tree Cover >= 70 and < 80%	3	Northern California Coastal Range	1000	California Coastal Redwood Forest	5	Conifer	Redwood Forest and Woodland	SAF 232: Redwood	Tree-dominated	Open tree canopy	100 <= CH < 250	Tr California Coastal Redwood Forest	Tree	Evergreen open tree canopy	70 <= CC < 80	REDW	Conifer
KBOINVENKLMNREDWOODSCOTR_10	1199.24	0.102993	1425.54	1.36029	1.28616	1798.35	14.08	13.065	35	25	0	28	79	0.754054		ac	NW	9	9 <= CBD < 10	Succession Class A	0	No Disturbance	NA	Upland Forest	10150	California Coastal Redwood Forest	106	Redwood-1	Conifer	103	Tree Cover >= 30 and < 40%	3	Northern California Coastal Range	1000	California Coastal Redwood Forest	5	Conifer	Redwood Forest and Woodland	SAF 232: Redwood	Tree-dominated	Open tree canopy	0 < CH < 50	Tr California Coastal Redwood Forest	Tree	Evergreen open tree canopy	30 <= CC < 40	REDW	Conifer
KBOINVENKLMNREDWOODSKAKL_02	1155.68	2.52246	788.231	0.474342	0.354657	1829.4	12.93	13.035	55	175	93	1	1	0.739753		ab	E	11	11 <= CBD < 12	Uncharacteristic Native Vegetation Cover / Struct*	0	No Disturbance	NA	Wetland Shrub-Herb	11700	Klamath-Siskiyou Xeromorphic Serpentine Savanna and Chaparral	268	Jeffery Pine-Roemers Fescue-Oatgrass-1	Conifer	105	Tree Cover >= 50 and < 60%	3	Northern California Coastal Range	1200	Klamath-Siskiyou Xeromorphic Serpentine Savanna and Chaparral	6	Shrubland	Chaparral	SAF 248: Knobcone Pine	Tree-dominated	Sparse tree canopy	100 <= CH < 250	Tr Klamath-Siskiyou Xeromorphic Serpentine Savanna and Chaparral	Tree	Mixed evergreen-deciduous sparse tree canopy	50 <= CC < 60	REDW	Mixed
KBOINVENKLMNREDWOODSMAJOR_09	360.682	1.05967	852.185	2.8348	0.143548	1565.86	12.65	12.5875	85	500	75	11	47	0.903569		ac	W	22	22 <= CBD < 23	Succession Class C	0	No Disturbance	NA	Upland Forest	10150	California Coastal Redwood Forest	106	Redwood-1	Conifer	108	Tree Cover >= 80 and < 90%	3	Northern California Coastal Range	1000	California Coastal Redwood Forest	5	Conifer	Redwood Forest and Woodland	SAF 232: Redwood	Tree-dominated	Open tree canopy	CH >= 500	Tr California Coastal Redwood Forest	Tree	Evergreen open tree canopy	80 <= CC < 90	REDW	Conifer
KBOINVENKLMNREDWOODSRICH_03	827.637	1.01834	1566.94	2.89154	0.121517	1878.96	15.66	12.5775	95	175	42	10	85	0.837909		ac	SE	42	42 <= CBD < 43	Succession Class C	0	No Disturbance	NA	Upland Forest	10150	California Coastal Redwood Forest	106	Redwood-1	Conifer	109	Tree Cover >= 90 and <= 100%	3	Northern California Coastal Range	1000	California Coastal Redwood Forest	5	Conifer	Redwood Forest and Woodland	SAF 232: Redwood	Tree-dominated	Open tree canopy	100 <= CH < 250	Tr California Coastal Redwood Forest	Tree	Evergreen open tree canopy	90 <= CC <= 100	REDW	Conifer
KBOINVENKLMNREDWOODSRICH_11	384.447	1.4686	1085.4	2.48566	0.093583	1878.96	15.66	12.5775	75	500	76	28	74	0.99691		ab	S	16	16 <= CBD < 17	Succession Class C	0	No Disturbance	NA	Upland Forest	10150	California Coastal Redwood Forest	106	Redwood-1	Conifer	107	Tree Cover >= 70 and < 80%	3	Northern California Coastal Range	1000	California Coastal Redwood Forest	5	Conifer	Redwood Forest and Woodland	SAF 232: Redwood	Tree-dominated	Open tree canopy	CH >= 500	Tr California Coastal Redwood Forest	Tree	Evergreen open tree canopy	70 <= CC < 80	REDW	Mixed
KBOINVENKLMNWHISKEYTARMR_03	287.483	130.497	17.016	1.56605	0.146664	1551.48	29.29	19.7825	0	0	68	15	381	0.860314		z	NW	0	Non-Forested	Uncharacteristic Exotic Vegetation	112	Fire	Low	Upland Forest	11140	California Lower Montane Blue Oak-Foothill Pine Woodland and Savanna	211	Blue Oak-California Foothill Pine-1	Hardwood	125	Herb Cover >= 50 and < 60%	3	Northern California Coastal Range	1100	California Lower Montane Blue Oak-Foothill Pine Woodland and Savanna	5	Exotic Herbaceous	Introduced Annual Grassland	LF 54: Introduced Upland Vegetation - Herbaceous	Herbaceous / Nonvascular-dominated	Herbaceous - grassland	Non-Forested	He California Annual Grassland	Herb	Annual Graminoid/Forb	Non-Forested	WHIS	Mixed
KBOINVENKLMNWHISKEYTARMR_10	1094.55	131.425	819.873	2.52357	0.611909	1621.61	29.23	19.0375	35	175	60	22	455	1.00233		e	S	6	6 <= CBD < 7	Succession Class C	112	Fire	Low	Upland Woodland	11140	California Lower Montane Blue Oak-Foothill Pine Woodland and Savanna	211	Blue Oak-California Foothill Pine-1	Hardwood	103	Tree Cover >= 30 and < 40%	3	Northern California Coastal Range	1100	California Lower Montane Blue Oak-Foothill Pine Woodland and Savanna	4	Conifer-Hardwood	Conifer-Oak Forest and Woodland	SAF 250: Blue Oak-Digger Pine	Tree-dominated	Closed tree canopy	100 <= CH < 250	Tr Pinus sabiniana Woodland Alliance	Tree	Evergreen closed tree canopy	30 <= CC < 40	WHIS	Mixed
KBOINVENKLMNWHISKEYTBOCK_06	213.314	126.56	1143.59	1.45523	0.255981	1481.97	29.58	18.7025	65	175	0	11	510	0.903569		r	S	16	16 <= CBD < 17	Succession Class D	0	No Disturbance	NA	Upland Forest	11140	California Lower Montane Blue Oak-Foothill Pine Woodland and Savanna	211	Blue Oak-California Foothill Pine-1	Hardwood	106	Tree Cover >= 60 and < 70%	3	Northern California Coastal Range	1100	California Lower Montane Blue Oak-Foothill Pine Woodland and Savanna	5	Conifer	Conifer-Oak Forest and Woodland	SAF 250: Blue Oak-Digger Pine	Tree-dominated	Sparse tree canopy	100 <= CH < 250	Tr California Lower Montane Foothill Pine Woodland and Savanna	Tree	Evergreen open tree canopy	60 <= CC < 70	WHIS	Conifer
KBOINVENKLMNWHISKEYTBRCC_01	424.799	129.244	302.708	2.46073	0.073602	1747.79	29.39	19.975	65	175	0	18	411	0.518822		z	NE	16	16 <= CBD < 17	Succession Class B	0	No Disturbance	NA	Upland Forest	10270	Mediterranean California Dry-Mesic Mixed Conifer Forest and Woodland	116	Ponderosa Pine-Incense Cedar-1	Conifer	106	Tree Cover >= 60 and < 70%	3	Northern California Coastal Range	1000	Mediterranean California Dry-Mesic Mixed Conifer Forest and Woodland	5	Conifer	Douglas-fir-Ponderosa Pine-Lodgepole Pine Forest and Woodland	SAF 243: Sierra Nevada Mixed Conifer	Tree-dominated	Open tree canopy	100 <= CH < 250	Tr Mediterranean California Dry-Mesic Mixed Conifer Forest and Woodland	Tree	Evergreen open tree canopy	60 <= CC < 70	WHIS	Mixed
KBOINVENKLMNWHISKEYTBRCC_10	62.05	129.469	456.732	3.03134	0.135926	1797.04	29.46	19.5525	55	175	80	5	413	0.756451		i	SE	11	11 <= CBD < 12	Succession Class C	0	No Disturbance	NA	Upland Forest	11520	California Montane Riparian Systems	249	Black Cottonwood-Arroyo Willow-Madrone-3	Riparian	105	Tree Cover >= 50 and < 60%	3	Northern California Coastal Range	1200	California Montane Riparian Systems	5	Riparian	Western Riparian Woodland and Shrubland	SRM 203: Riparian Woodland	Tree-dominated	Open tree canopy	100 <= CH < 250	Tr California Montane Riparian Systems	Tree	Mixed evergreen-deciduous open tree canopy	50 <= CC < 60	WHIS	Conifer
KBOINVENKLMNWHISKEYTCCRE_02	210.033	123.11	388.006	0.15	0.140182	1236.93	29.61	18.5825	25	175	69	30	488	0.81985		z	SE	1	1 <= CBD < 2	Succession Class D	133	Fire	High	Upland Woodland	10290	Mediterranean California Mixed Oak Woodland	118	Oregon White Oak-Romers Fescue-Oatgrass-1	Hardwood	102	Tree Cover >= 20 and < 30%	3	Northern California Coastal Range	1000	Mediterranean California Mixed Oak Woodland	4	Hardwood	Western Oak Woodland and Savanna	SAF 246: California Black Oak	Tree-dominated	Open tree canopy	100 <= CH < 250	Tr Mediterranean California Mixed Oak Woodland	Tree	Evergreen open tree canopy	20 <= CC < 30	WHIS	Mixed
KBOINVENKLMNWHISKEYTCCRE_08	98.667	123.91	433.383	0.212132	0.011516	1270.3	29.69	19.27	65	175	69	31	431	1.05421		z	W	16	16 <= CBD < 17	Succession Class D	0	No Disturbance	NA	Upland Forest	11140	California Lower Montane Blue Oak-Foothill Pine Woodland and Savanna	211	Blue Oak-California Foothill Pine-1	Hardwood	106	Tree Cover >= 60 and < 70%	3	Northern California Coastal Range	1100	California Lower Montane Blue Oak-Foothill Pine Woodland and Savanna	5	Conifer-Hardwood	Conifer-Oak Forest and Woodland	SAF 250: Blue Oak-Digger Pine	Tree-dominated	Closed tree canopy	100 <= CH < 250	Tr Pinus sabiniana Woodland Alliance	Tree	Evergreen closed tree canopy	60 <= CC < 70	WHIS	Mixed
KBOINVENKLMNWHISKEYTMIBC_06	81.331	128.01	1165.05	4.88226	0.067836	1864.03	29.58	17.74	65	375	76	15	588	0.598406		r	E	12	12 <= CBD < 13	Succession Class E	311	Mechanical Remove	Low	Upland Forest	10270	Mediterranean California Dry-Mesic Mixed Conifer Forest and Woodland	116	Ponderosa Pine-Incense Cedar-1	Conifer	106	Tree Cover >= 60 and < 70%	3	Northern California Coastal Range	1000	Mediterranean California Dry-Mesic Mixed Conifer Forest and Woodland	5	Conifer	Douglas-fir-Ponderosa Pine-Lodgepole Pine Forest and Woodland	SAF 243: Sierra Nevada Mixed Conifer	Tree-dominated	Open tree canopy	250 <= CH < 500	Tr Mediterranean California Dry-Mesic Mixed Conifer Forest and Woodland	Tree	Evergreen open tree canopy	60 <= CC < 70	WHIS	Conifer
KBOINVENKLMNWHISKEYTMICR_04	201.39	123.196	1183.99	1.06066	0.345621	1315.05	29.69	18.815	35	25	81	21	485	0.672095		g	E	1	1 <= CBD < 2	Succession Class A	0	No Disturbance	NA	Upland Forest	10290	Mediterranean California Mixed Oak Woodland	118	Oregon White Oak-Romers Fescue-Oatgrass-1	Hardwood	103	Tree Cover >= 30 and < 40%	3	Northern California Coastal Range	1000	Mediterranean California Mixed Oak Woodland	5	Hardwood	Western Oak Woodland and Savanna	SAF 246: California Black Oak	Tree-dominated	Open tree canopy	0 < CH < 50	Tr Mediterranean California Mixed Oak Woodland	Tree	Evergreen open tree canopy	30 <= CC < 40	WHIS	Conifer
KBOINVENKLMNWHISKEYTNNCR_05	394.837	121.948	3261.64	3.81283	0.320376	1644.84	28.69	16.27	45	175	87	13	904	0.895191		r	SW	1	1 <= CBD < 2	Succession Class C	0	No Disturbance	NA	Upland Woodland	10270	Mediterranean California Dry-Mesic Mixed Conifer Forest and Woodland	116	Ponderosa Pine-Incense Cedar-1	Conifer	104	Tree Cover >= 40 and < 50%	3	Northern California Coastal Range	1000	Mediterranean California Dry-Mesic Mixed Conifer Forest and Woodland	4	Hardwood	Western Oak Woodland and Savanna	SAF 246: California Black Oak	Tree-dominated	Open tree canopy	100 <= CH < 250	Tr Mediterranean California Mixed Oak Woodland	Tree	Evergreen open tree canopy	40 <= CC < 50	WHIS	Conifer
KBOINVENKLMNWHISKEYTNNCR_12	754.993	122.781	3667.3	4.30173	0.997528	1730.59	26.23	16.8225	45	375	68	20	1198	0.912044		q	NW	6	6 <= CBD < 7	Succession Class D	112	Fire	Low	Upland Forest	10270	Mediterranean California Dry-Mesic Mixed Conifer Forest and Woodland	116	Ponderosa Pine-Incense Cedar-1	Conifer	104	Tree Cover >= 40 and < 50%	3	Northern California Coastal Range	1000	Mediterranean California Mesic Mixed Conifer Forest and Woodland	5	Conifer	Douglas-fir-Ponderosa Pine-Lodgepole Pine Forest and Woodland	SAF 243: Sierra Nevada Mixed Conifer	Tree-dominated	Open tree canopy	250 <= CH < 500	Tr Mediterranean California Dry-Mesic Mixed Conifer Forest and Woodland	Tree	Evergreen open tree canopy	40 <= CC < 50	WHIS	Conifer
KBOINVENKLMNWHISKEYTSALT_09	2090.35	135.017	2036.34	3.95022	0.034478	1545.07	29.43	20.445	65	175	74	3	320	0.789151		z	W	16	16 <= CBD < 17	Succession Class C	0	No Disturbance	NA	Upland Forest	11520	California Montane Riparian Systems	249	Black Cottonwood-Arroyo Willow-Madrone-3	Riparian	106	Tree Cover >= 60 and < 70%	3	Northern California Coastal Range	1200	California Montane Riparian Systems	5	Conifer	Conifer-Oak Forest and Woodland	SAF 250: Blue Oak-Digger Pine	Tree-dominated	Sparse tree canopy	100 <= CH < 250	Tr California Lower Montane Foothill Pine Woodland and Savanna	Tree	Evergreen open tree canopy	60 <= CC < 70	WHIS	Mixed
KBOLONGTBBS BARTLE_02	1022.81	188.586	1667.55	2.64307	2.13731	1201.67	30.1	13.4325	35	175	61	0	1214	0.759238		m	SW	6	6 <= CBD < 7	Succession Class C	0	No Disturbance	NA	Upland Woodland	10280	Mediterranean California Mesic Mixed Conifer Forest and Woodland	117	Douglas Fir-White Fir-Sugar Pine-1	Conifer	103	Tree Cover >= 30 and < 40%	7	Cascade Mountain Range	1000	Mediterranean California Mesic Mixed Conifer Forest and Woodland	4	Conifer	Ponderosa Pine Forest, Woodland and Savanna	SAF 237: Interior Ponderosa Pine	Tree-dominated	Open tree canopy	100 <= CH < 250	Tr Northern Rocky Mountain Ponderosa Pine Woodland and Savanna	Tree	Evergreen open tree canopy	30 <= CC < 40	No	Conifer
KBOLONGTBBS BARTLE_17	7512.76	195.832	1593.27	12.6365	4.98503	923.61	28.34	13.4675	65	375	63	0	1397	0.7556		m	Flat	12	12 <= CBD < 13	Succession Class E	0	No Disturbance	NA	Upland Forest	10280	Mediterranean California Mesic Mixed Conifer Forest and Woodland	117	Douglas Fir-White Fir-Sugar Pine-1	Conifer	106	Tree Cover >= 60 and < 70%	7	Cascade Mountain Range	1000	Mediterranean California Mesic Mixed Conifer Forest and Woodland	5	Conifer	Douglas-fir-Grand Fir-White Fir Forest and Woodland	SAF 211: White Fir	Tree-dominated	Closed tree canopy	250 <= CH < 500	Tr Mediterranean California Mesic Mixed Conifer Forest and Woodland	Tree	Evergreen closed tree canopy	60 <= CC < 70	No	Conifer
KBOLONGTBBS BARTLE_33	9631.06	206.357	694.756	22.3578	14.5331	775.6	29.9	14.145	25	175	25	1	1186	0.740061		e	NE	4	4 <= CBD < 5	Succession Class C	0	No Disturbance	NA	Upland Woodland	10310	California Montane Jeffrey Pine(-Ponderosa Pine) Woodland	120	Jeffrey Pine-1	Conifer	102	Tree Cover >= 20 and < 30%	7	Cascade Mountain Range	1000	Mediterranean California Mesic Mixed Conifer Forest and Woodland	4	Conifer	Ponderosa Pine Forest, Woodland and Savanna	SAF 237: Interior Ponderosa Pine	Tree-dominated	Open tree canopy	100 <= CH < 250	Tr Northern Rocky Mountain Ponderosa Pine Woodland and Savanna	Tree	Evergreen open tree canopy	20 <= CC < 30	No	Mixed
KBOLONGTBBS BARTLE_40	8702.03	211.003	568.131	26.9605	18.9231	752.58	30.17	14.135	35	175	63	0	1177	0.7556		s	Flat	6	6 <= CBD < 7	Succession Class C	0	No Disturbance	NA	Upland Forest	11540	Inter-Mountain Basins Montane Riparian Systems	259	Black Cottonwood-Narrowleaf Willow-3	Riparian	103	Tree Cover >= 30 and < 40%	7	Cascade Mountain Range	1200	Inter-Mountain Basins Montane Riparian Systems	5	Riparian	Western Riparian Woodland and Shrubland	SAF 235: Cottonwood-Willow	Tree-dominated	Open tree canopy	100 <= CH < 250	Tr Inter-Mountain Basins Montane Riparian Systems	Tree	Mixed evergreen-deciduous open tree canopy	30 <= CC < 40	No	Mixed
KBOLONGTBBS BARTLE_48	8968.42	214.651	1860.02	30.7323	22.3999	738.33	28.9	13.83	0	0	46	1	1324	0.756697		z	NW	0	Non-Forested	Succession Class A	0	No Disturbance	NA	Upland Forest	10280	Mediterranean California Mesic Mixed Conifer Forest and Woodland	117	Douglas Fir-White Fir-Sugar Pine-1	Conifer	103	Tree Cover >= 30 and < 40%	7	Cascade Mountain Range	1000	Mediterranean California Mesic Mixed Conifer Forest and Woodland	5	Conifer	Douglas-fir-Grand Fir-White Fir Forest and Woodland	SAF 211: White Fir	Tree-dominated	Closed tree canopy	Non-Forested	Tr Mediterranean California Mesic Mixed Conifer Forest and Woodland	Tree	Evergreen closed tree canopy	Non-Forested	No	Mixed
KBOLONGTBBS MCCLOUD_3	1662.32	147.321	807.038	0.067082	0.079566	1097.57	28.38	14.2675	45	175	65	3	1158	0.794021		r	SW	8	8 <= CBD < 9	Succession Class C	0	No Disturbance	NA	Upland Forest	10280	Mediterranean California Mesic Mixed Conifer Forest and Woodland	117	Douglas Fir-White Fir-Sugar Pine-1	Conifer	104	Tree Cover >= 40 and < 50%	7	Cascade Mountain Range	1000	Mediterranean California Mesic Mixed Conifer Forest and Woodland	5	Conifer	California Mixed Evergreen Forest and Woodland	SAF 234: Douglas-Fir-Tanoak-Pacific Madrone	Tree-dominated	Closed tree canopy	100 <= CH < 250	Tr Mediterranean California Mixed Evergreen Forest	Tree	Evergreen closed tree canopy	40 <= CC < 50	No	Conifer
KBOLONGTKLMNCRATERLACR01_05	231.675	172.542	3989.94	3.47081	0.253914	1570.39	26.83	9.63	75	375	81	17	1597	0.566733		l	N	16	16 <= CBD < 17	Succession Class E	0	No Disturbance	NA	Upland Forest	10280	Mediterranean California Mesic Mixed Conifer Forest and Woodland	117	Douglas Fir-White Fir-Sugar Pine-1	Conifer	107	Tree Cover >= 70 and < 80%	7	Cascade Mountain Range	1000	Mediterranean California Mesic Mixed Conifer Forest and Woodland	5	Conifer	Douglas-fir-Grand Fir-White Fir Forest and Woodland	SAF 211: White Fir	Tree-dominated	Closed tree canopy	250 <= CH < 500	Tr Mediterranean California Mesic Mixed Conifer Forest and Woodland	Tree	Evergreen closed tree canopy	70 <= CC < 80	CRLA	Conifer
KBOLONGTKLMNCRATERLACR01_10	532.92	173.011	3686.91	3.54318	0.636298	1632.3	26.77	9.55	75	375	81	10	1612	0.668142		l	N	16	16 <= CBD < 17	Succession Class B	0	No Disturbance	NA	Upland Forest	10320	Mediterranean California Red Fir Forest	121	Red Fir-1	Conifer	107	Tree Cover >= 70 and < 80%	7	Cascade Mountain Range	1000	Mediterranean California Red Fir Forest	5	Conifer	Red Fir Forest and Woodland	SAF 207: Red Fir	Tree-dominated	Open tree canopy	250 <= CH < 500	Tr Mediterranean California Red Fir Forest	Tree	Evergreen open tree canopy	70 <= CC < 80	CRLA	Conifer
KBOLONGTKLMNCRATERLACR03_02	3094.01	183.781	2066.07	3.82838	0.863282	1595.7	26.23	8.27	45	175	38	0	1875	0.749889		m	E	8	8 <= CBD < 9	Succession Class B	0	No Disturbance	NA	Upland Woodland	11670	Rocky Mountain Poor-Site Lodgepole Pine Forest	266	Lodgepole Pine-Kinnikinnick-4	Conifer	104	Tree Cover >= 40 and < 50%	7	Cascade Mountain Range	1100	Sierra Nevada Subalpine Lodgepole Pine Forest and Woodland	4	Conifer	Lodgepole Pine Forest and Woodland	SAF 218: Lodgepole Pine	Tree-dominated	Closed tree canopy	100 <= CH < 250	Tr Sierra Nevada Subalpine Lodgepole Pine Forest and Woodland	Tree	Evergreen closed tree canopy	40 <= CC < 50	CRLA	Conifer
KBOLONGTKLMNCRATERLACR03_07	2751.78	183.603	1506.45	3.602	0.553832	1624.95	25.96	7.9275	45	175	30	1	1875	0.73742		m	NE	8	8 <= CBD < 9	Succession Class B	0	No Disturbance	NA	Upland Woodland	11670	Rocky Mountain Poor-Site Lodgepole Pine Forest	266	Lodgepole Pine-Kinnikinnick-4	Conifer	104	Tree Cover >= 40 and < 50%	7	Cascade Mountain Range	1100	Sierra Nevada Subalpine Lodgepole Pine Forest and Woodland	4	Conifer	Lodgepole Pine Forest and Woodland	SAF 218: Lodgepole Pine	Tree-dominated	Closed tree canopy	100 <= CH < 250	Tr Sierra Nevada Subalpine Lodgepole Pine Forest and Woodland	Tree	Evergreen closed tree canopy	40 <= CC < 50	CRLA	Conifer
KBOLONGTKLMNCRATERLACR04_10	2207.26	174.937	3733.73	5.90444	0.89843	1591.03	26.38	8.1825	65	375	56	5	1802	0.706772		m	N	12	12 <= CBD < 13	Succession Class E	0	No Disturbance	NA	Upland Forest	10412	North Pacific Mountain Hemlock Forest - Xeric	131	Mountain Hemlock-Huckleberry-5	Conifer	106	Tree Cover >= 60 and < 70%	7	Cascade Mountain Range	1000	North Pacific Mountain Hemlock Forest	5	Conifer	Mountain Hemlock Forest and Woodland	SAF 205: Mountain Hemlock	Tree-dominated	Closed tree canopy	250 <= CH < 500	Tr North Pacific Mountain Hemlock Forest	Tree	Evergreen closed tree canopy	60 <= CC < 70	CRLA	Conifer
KBOLONGTKLMNCRATERLACR05_02	741.647	183.346	768.353	0.641327	0.637429	1751.22	25.85	7.1525	55	375	37	7	2008	0.815074		m	NW	9	9 <= CBD < 10	Succession Class D	0	No Disturbance	NA	Upland Forest	10412	North Pacific Mountain Hemlock Forest - Xeric	131	Mountain Hemlock-Huckleberry-5	Conifer	105	Tree Cover >= 50 and < 60%	7	Cascade Mountain Range	1000	North Pacific Mountain Hemlock Forest	5	Conifer	Mountain Hemlock Forest and Woodland	SAF 205: Mountain Hemlock	Tree-dominated	Closed tree canopy	250 <= CH < 500	Tr North Pacific Mountain Hemlock Forest	Tree	Evergreen closed tree canopy	50 <= CC < 60	CRLA	Conifer
KBOLONGTKLMNCRATERLACR07_08	176.774	172.58	1690.67	6.07231	0.395296	1532.63	26.4	8.7075	55	375	65	5	1726	0.817312		k	SW	9	9 <= CBD < 10	Succession Class B	0	No Disturbance	NA	Upland Forest	10320	Mediterranean California Red Fir Forest	121	Red Fir-1	Conifer	105	Tree Cover >= 50 and < 60%	7	Cascade Mountain Range	1000	North Pacific Mountain Hemlock Forest	5	Conifer	Mountain Hemlock Forest and Woodland	SAF 205: Mountain Hemlock	Tree-dominated	Open tree canopy	250 <= CH < 500	Tr Northern California Mesic Subalpine Woodland	Tree	Evergreen open tree canopy	50 <= CC < 60	CRLA	Conifer
KBOLONGTKLMNCRATERLACR08_02	481.245	185.343	10097.5	0.64622	0.644686	1005.98	28.59	8.8	45	375	48	3	1717	0.701462		m	NE	6	6 <= CBD < 7	Succession Class B	0	No Disturbance	NA	Upland Forest	10320	Mediterranean California Red Fir Forest	121	Red Fir-1	Conifer	104	Tree Cover >= 40 and < 50%	7	Cascade Mountain Range	1000	Mediterranean California Red Fir Forest	5	Conifer	Red Fir Forest and Woodland	SAF 207: Red Fir	Tree-dominated	Open tree canopy	250 <= CH < 500	Tr Mediterranean California Red Fir Forest	Tree	Evergreen open tree canopy	40 <= CC < 50	CRLA	Conifer
KBOLONGTKLMNCRATERLACR08_10	377.614	185.821	10501.7	0.618466	0.616172	1014.41	28.86	8.84	35	175	48	2	1683	0.728784		m	E	6	6 <= CBD < 7	Succession Class C	0	No Disturbance	NA	Upland Woodland	11670	Rocky Mountain Poor-Site Lodgepole Pine Forest	266	Lodgepole Pine-Kinnikinnick-4	Conifer	103	Tree Cover >= 30 and < 40%	7	Cascade Mountain Range	1000	Mediterranean California Red Fir Forest	4	Conifer	Lodgepole Pine Forest and Woodland	SAF 218: Lodgepole Pine	Tree-dominated	Closed tree canopy	100 <= CH < 250	Tr Sierra Nevada Subalpine Lodgepole Pine Forest and Woodland	Tree	Evergreen closed tree canopy	30 <= CC < 40	CRLA	Conifer
KBOLONGTKLMNCRATERLACR09_06	683.205	193.747	6648.59	4.32666	0.457796	1136.44	27.16	8.895	55	175	52	1	1765	0.76747		m	SE	11	11 <= CBD < 12	Succession Class B	0	No Disturbance	NA	Upland Forest	10320	Mediterranean California Red Fir Forest	121	Red Fir-1	Conifer	105	Tree Cover >= 50 and < 60%	7	Cascade Mountain Range	1000	Mediterranean California Red Fir Forest	5	Conifer	Douglas-fir-Ponderosa Pine-Lodgepole Pine Forest and Woodland	SAF 218: Lodgepole Pine	Tree-dominated	Open tree canopy	100 <= CH < 250	Tr North Pacific Wooded Volcanic Flowage	Tree	Evergreen open tree canopy	50 <= CC < 60	CRLA	Conifer
KBOLONGTKLMNCRATERLACR09_09	527.028	193.659	6434.25	4.12257	0.680982	1136.44	27.16	8.895	55	175	52	1	1770	0.775666		m	S	11	11 <= CBD < 12	Succession Class B	0	No Disturbance	NA	Upland Forest	10320	Mediterranean California Red Fir Forest	121	Red Fir-1	Conifer	105	Tree Cover >= 50 and < 60%	7	Cascade Mountain Range	1000	Mediterranean California Red Fir Forest	5	Conifer	Red Fir Forest and Woodland	SAF 207: Red Fir	Tree-dominated	Open tree canopy	100 <= CH < 250	Tr Mediterranean California Red Fir Forest	Tree	Evergreen open tree canopy	50 <= CC < 60	CRLA	Conifer
KBOLONGTKLMNCRATERLACR10_02	2607.28	174.783	2756.55	5.32886	0.422745	1611.18	26.19	8.21	55	375	47	1	1800	0.76747		m	NW	9	9 <= CBD < 10	Succession Class B	0	No Disturbance	NA	Upland Forest	10320	Mediterranean California Red Fir Forest	121	Red Fir-1	Conifer	105	Tree Cover >= 50 and < 60%	7	Cascade Mountain Range	1000	North Pacific Mountain Hemlock Forest	5	Conifer	Red Fir Forest and Woodland	SAF 207: Red Fir	Tree-dominated	Open tree canopy	250 <= CH < 500	Tr Mediterranean California Red Fir Forest	Tree	Evergreen open tree canopy	50 <= CC < 60	CRLA	Conifer
KBOLONGTKLMNCRATERLACR11_01	8248.89	182.326	4234.51	1.23329	0.971307	1275.82	27.67	7.89	0	0	54	1	1846	0.74398		m	Flat	0	Non-Forested	Barren	0	No Disturbance	NA	Undetermined	31	Barren-Rock/Sand/Clay	31	Barren-Rock/Sand/Clay	Barren-Rock/Sand/Cl*	31	Barren	7	Cascade Mountain Range	31	Barren-Rock/Sand/Clay	0	Barren	Barren	Non-vegetated	Non-vegetated	Non-vegetated	Non-Forested	Bab Barren	Barren	Non-vegetated	Non-Forested	CRLA	Conifer
KBOLONGTKLMNCRATERLACR11_11	7852.74	182.544	5022.21	1.4151	0.087773	1224.25	27.9	7.985	35	175	43	0	1826	0.767624		m	W	6	6 <= CBD < 7	Succession Class C	0	No Disturbance	NA	Upland Woodland	11670	Rocky Mountain Poor-Site Lodgepole Pine Forest	266	Lodgepole Pine-Kinnikinnick-4	Conifer	103	Tree Cover >= 30 and < 40%	7	Cascade Mountain Range	1100	Sierra Nevada Subalpine Lodgepole Pine Forest and Woodland	4	Conifer	Lodgepole Pine Forest and Woodland	SAF 218: Lodgepole Pine	Tree-dominated	Closed tree canopy	100 <= CH < 250	Tr Sierra Nevada Subalpine Lodgepole Pine Forest and Woodland	Tree	Evergreen closed tree canopy	30 <= CC < 40	CRLA	Conifer
KBOLONGTKLMNCRATERLACR12_03	474.194	185.947	1296.89	0.751798	0.347912	1582.03	26.17	8.1775	55	375	64	6	1808	0.783892		m	SE	9	9 <= CBD < 10	Succession Class B	0	No Disturbance	NA	Upland Forest	10320	Mediterranean California Red Fir Forest	121	Red Fir-1	Conifer	105	Tree Cover >= 50 and < 60%	7	Cascade Mountain Range	1000	North Pacific Mountain Hemlock Forest	5	Conifer	Red Fir Forest and Woodland	SAF 207: Red Fir	Tree-dominated	Open tree canopy	250 <= CH < 500	Tr Mediterranean California Red Fir Forest	Tree	Evergreen open tree canopy	50 <= CC < 60	CRLA	Conifer
KBOLONGTKLMNCRATERLACR12_04	301.256	185.39	753.666	0.42	0.432	1643.59	26.34	8.3675	65	375	64	6	1821	0.831955		m	SW	12	12 <= CBD < 13	Succession Class E	0	No Disturbance	NA	Upland Forest	10412	North Pacific Mountain Hemlock Forest - Xeric	131	Mountain Hemlock-Huckleberry-5	Conifer	106	Tree Cover >= 60 and < 70%	7	Cascade Mountain Range	1000	North Pacific Mountain Hemlock Forest	5	Conifer	Mountain Hemlock Forest and Woodland	SAF 205: Mountain Hemlock	Tree-dominated	Closed tree canopy	250 <= CH < 500	Tr North Pacific Mountain Hemlock Forest	Tree	Evergreen closed tree canopy	60 <= CC < 70	CRLA	Conifer
KBOLONGTKLMNCRATERLACR13_01	1134.27	190.922	2801.81	0.725603	0.678399	1136.35	26.43	7.1175	75	375	52	19	1994	0.555853		m	E	16	16 <= CBD < 17	Succession Class B	0	No Disturbance	NA	Upland Forest	10320	Mediterranean California Red Fir Forest	121	Red Fir-1	Conifer	107	Tree Cover >= 70 and < 80%	7	Cascade Mountain Range	1000	North Pacific Mountain Hemlock Forest	5	Conifer	Mountain Hemlock Forest and Woodland	SAF 205: Mountain Hemlock	Tree-dominated	Open tree canopy	250 <= CH < 500	Tr Northern California Mesic Subalpine Woodland	Tree	Evergreen open tree canopy	70 <= CC < 80	CRLA	Conifer
KBOLONGTKLMNCRATERLACR14_01	2221.63	173.269	2242.63	4.03051	0.103748	1427.91	26.91	8.6425	55	375	56	1	1716	0.760372		m	NW	9	9 <= CBD < 10	Succession Class B	0	No Disturbance	NA	Upland Forest	10320	Mediterranean California Red Fir Forest	121	Red Fir-1	Conifer	105	Tree Cover >= 50 and < 60%	7	Cascade Mountain Range	1000	North Pacific Mountain Hemlock Forest	5	Conifer	Mountain Hemlock Forest and Woodland	SAF 205: Mountain Hemlock	Tree-dominated	Open tree canopy	250 <= CH < 500	Tr Northern California Mesic Subalpine Woodland	Tree	Evergreen open tree canopy	50 <= CC < 60	CRLA	Conifer
KBOLONGTKLMNCRATERLACR15_09	1789.19	174.076	3476.05	5.46041	0.3535	1547.65	26.3	8.415	55	375	59	6	1787	0.71022		m	N	9	9 <= CBD < 10	Succession Class B	0	No Disturbance	NA	Upland Forest	10320	Mediterranean California Red Fir Forest	121	Red Fir-1	Conifer	105	Tree Cover >= 50 and < 60%	7	Cascade Mountain Range	1000	North Pacific Mountain Hemlock Forest	5	Conifer	Mountain Hemlock Forest and Woodland	SAF 205: Mountain Hemlock	Tree-dominated	Open tree canopy	250 <= CH < 500	Tr Northern California Mesic Subalpine Woodland	Tree	Evergreen open tree canopy	50 <= CC < 60	CRLA	Conifer
KBOLONGTKLMNCRATERLACR16_02	703.962	174.362	4942.59	0.494773	0.493072	1597.3	27.03	9.8775	55	375	73	4	1544	0.803123		m	W	9	9 <= CBD < 10	Succession Class B	0	No Disturbance	NA	Upland Forest	10320	Mediterranean California Red Fir Forest	121	Red Fir-1	Conifer	105	Tree Cover >= 50 and < 60%	7	Cascade Mountain Range	1000	Mediterranean California Red Fir Forest	5	Conifer	Red Fir Forest and Woodland	SAF 207: Red Fir	Tree-dominated	Open tree canopy	250 <= CH < 500	Tr Mediterranean California Red Fir Forest	Tree	Evergreen open tree canopy	50 <= CC < 60	CRLA	Conifer
KBOLONGTKLMNCRATERLACR17_04	811.923	183.893	840.329	2.46	0.799692	1697.32	25.99	7.1325	55	375	42	9	1939	0.655129		m	E	9	9 <= CBD < 10	Succession Class D	0	No Disturbance	NA	Upland Forest	10412	North Pacific Mountain Hemlock Forest - Xeric	131	Mountain Hemlock-Huckleberry-5	Conifer	105	Tree Cover >= 50 and < 60%	7	Cascade Mountain Range	1000	North Pacific Mountain Hemlock Forest	5	Conifer	Mountain Hemlock Forest and Woodland	SAF 205: Mountain Hemlock	Tree-dominated	Closed tree canopy	250 <= CH < 500	Tr North Pacific Mountain Hemlock Forest	Tree	Evergreen closed tree canopy	50 <= CC < 60	CRLA	Conifer
KBOLONGTKLMNCRATERLACR17_09	743.611	184.42	1396.89	1.90683	0.8865	1616.55	25.94	7.7975	45	375	57	3	1889	0.76898		m	NW	6	6 <= CBD < 7	Succession Class B	0	No Disturbance	NA	Upland Forest	10320	Mediterranean California Red Fir Forest	121	Red Fir-1	Conifer	104	Tree Cover >= 40 and < 50%	7	Cascade Mountain Range	1000	North Pacific Mountain Hemlock Forest	5	Conifer	Mountain Hemlock Forest and Woodland	SAF 205: Mountain Hemlock	Tree-dominated	Open tree canopy	250 <= CH < 500	Tr Northern California Mesic Subalpine Woodland	Tree	Evergreen open tree canopy	40 <= CC < 50	CRLA	Conifer
KBOLONGTKLMNCRATERLACR18_12	668.264	183.098	2010.26	0.913893	0.924206	1691.13	25.93	6.5425	45	175	35	10	2020	0.869019		m	W	8	8 <= CBD < 9	Succession Class D	0	No Disturbance	NA	Upland Forest	10412	North Pacific Mountain Hemlock Forest - Xeric	131	Mountain Hemlock-Huckleberry-5	Conifer	104	Tree Cover >= 40 and < 50%	7	Cascade Mountain Range	1000	North Pacific Mountain Hemlock Forest	5	Conifer	Mountain Hemlock Forest and Woodland	SAF 205: Mountain Hemlock	Tree-dominated	Closed tree canopy	100 <= CH < 250	Tr North Pacific Mountain Hemlock Forest	Tree	Evergreen closed tree canopy	40 <= CC < 50	CRLA	Conifer
KBOLONGTKLMNCRATERLACR19_01	1860.09	174.636	3488.54	6.21876	0.902599	1591.03	26.38	8.1825	35	175	49	2	1788	0.779899		m	SW	6	6 <= CBD < 7	Succession Class D	0	No Disturbance	NA	Upland Forest	10412	North Pacific Mountain Hemlock Forest - Xeric	131	Mountain Hemlock-Huckleberry-5	Conifer	103	Tree Cover >= 30 and < 40%	7	Cascade Mountain Range	1000	North Pacific Mountain Hemlock Forest	5	Conifer	Mountain Hemlock Forest and Woodland	SAF 205: Mountain Hemlock	Tree-dominated	Closed tree canopy	100 <= CH < 250	Tr North Pacific Mountain Hemlock Forest	Tree	Evergreen closed tree canopy	30 <= CC < 40	CRLA	Conifer
KBOLONGTKLMNCRATERLACR20_04	1852.16	178.154	2487.56	2.43148	2.42636	1674.15	25.98	8.1225	0	0	66	3	1795	0.793445		m	W	0	Non-Forested	Succession Class A	122	Fire	Moderate	Upland Forest	10320	Mediterranean California Red Fir Forest	121	Red Fir-1	Conifer	125	Herb Cover >= 50 and < 60%	7	Cascade Mountain Range	1000	North Pacific Mountain Hemlock Forest	5	Grassland	Grassland	SRM 102: Idaho Fescue	Herbaceous / Nonvascular-dominated	Herbaceous - grassland	Non-Forested	He North Pacific Montane Grassland	Herb	Perennial graminoid grassland	Non-Forested	CRLA	Conifer
KBOLONGTKLMNCRATERLACR20_09	1829.01	178.535	1964.42	2.49	2.47654	1679.95	25.94	7.955	0	0	42	0	1805	0.7556		m	Flat	0	Non-Forested	Succession Class A	112	Fire	Low	Upland Forest	10412	North Pacific Mountain Hemlock Forest - Xeric	131	Mountain Hemlock-Huckleberry-5	Conifer	115	Shrub Cover >= 50 and < 60%	7	Cascade Mountain Range	1000	North Pacific Mountain Hemlock Forest	5	Grassland	Alpine Dwarf-Shrubland, Fell-field and Meadow	SRM 108: Alpine Idaho Fescue	Shrub-dominated	Dwarf-shrubland	Non-Forested	Sh North Pacific Dry and Mesic Alpine Dwarf-Shrubland or Fell-field or Meadow	Shrub	Mixed evergreen-deciduous dwarf-shrubland	Non-Forested	CRLA	Conifer
KBOLONGTKLMNCRATERLACR21_03	1654.98	172.268	1623.63	4.10046	0.541858	1431.17	26.2	8.9075	45	175	64	2	1719	0.73895		m	E	8	8 <= CBD < 9	Succession Class B	0	No Disturbance	NA	Upland Forest	10320	Mediterranean California Red Fir Forest	121	Red Fir-1	Conifer	104	Tree Cover >= 40 and < 50%	7	Cascade Mountain Range	1000	North Pacific Mountain Hemlock Forest	5	Conifer	Mountain Hemlock Forest and Woodland	SAF 205: Mountain Hemlock	Tree-dominated	Open tree canopy	100 <= CH < 250	Tr Northern California Mesic Subalpine Woodland	Tree	Evergreen open tree canopy	40 <= CC < 50	CRLA	Conifer
KBOLONGTKLMNCRATERLACR21_06	1427.14	172.183	1401.76	3.8448	0.35776	1431.17	26.74	8.9275	55	175	64	6	1690	0.711876		m	Flat	11	11 <= CBD < 12	Succession Class B	0	No Disturbance	NA	Upland Forest	10320	Mediterranean California Red Fir Forest	121	Red Fir-1	Conifer	105	Tree Cover >= 50 and < 60%	7	Cascade Mountain Range	1000	Mediterranean California Red Fir Forest	5	Conifer	Red Fir Forest and Woodland	SAF 207: Red Fir	Tree-dominated	Open tree canopy	100 <= CH < 250	Tr Mediterranean California Red Fir Forest	Tree	Evergreen open tree canopy	50 <= CC < 60	CRLA	Conifer
KBOLONGTKLMNCRATERLACR22_01	4963.85	180.926	7786.03	0.6	0.582	1342.63	27.36	7.8775	0	0	52	1	1840	0.76492		m	NW	0	Non-Forested	Barren	0	No Disturbance	NA	Undetermined	31	Barren-Rock/Sand/Clay	31	Barren-Rock/Sand/Clay	Barren-Rock/Sand/Cl*	31	Barren	7	Cascade Mountain Range	31	Barren-Rock/Sand/Clay	0	Barren	Barren	Non-vegetated	Non-vegetated	Non-vegetated	Non-Forested	Bab Barren	Barren	Non-vegetated	Non-Forested	CRLA	Conifer
KBOLONGTKLMNCRATERLACR23_09	4825.81	182.75	8220.45	2.79	0.803981	1220.53	27.45	7.945	65	175	72	8	1948	0.868563		m	W	16	16 <= CBD < 17	Succession Class B	0	No Disturbance	NA	Upland Forest	10320	Mediterranean California Red Fir Forest	121	Red Fir-1	Conifer	106	Tree Cover >= 60 and < 70%	7	Cascade Mountain Range	1000	North Pacific Mountain Hemlock Forest	5	Conifer	Red Fir Forest and Woodland	SAF 207: Red Fir	Tree-dominated	Open tree canopy	100 <= CH < 250	Tr Mediterranean California Red Fir Forest	Tree	Evergreen open tree canopy	60 <= CC < 70	CRLA	Conifer
KBOLONGTKLMNCRATERLACR24_08	5.514	179.013	1855.62	0.742159	0.740558	1690.37	26.32	8.5375	0	0	58	36	1635	0.998233		m	S	0	Non-Forested	Succession Class A	0	No Disturbance	NA	Upland Woodland	11670	Rocky Mountain Poor-Site Lodgepole Pine Forest	266	Lodgepole Pine-Kinnikinnick-4	Conifer	114	Shrub Cover >= 40 and < 50%	7	Cascade Mountain Range	1000	Mediterranean California Red Fir Forest	4	Shrubland	Deciduous Shrubland	LF 41: Deciduous Shrubland	Shrub-dominated	Shrubland	Non-Forested	Sh North Pacific Montane Shrubland	Shrub	Mixed evergreen-deciduous shrubland	Non-Forested	CRLA	Conifer
KBOLONGTKLMNCRATERLACR25_01	5219	178.842	4646.32	1.98726	0.381074	1565.11	26.79	7.4575	45	175	43	1	1906	0.744852		m	N	8	8 <= CBD < 9	Succession Class B	0	No Disturbance	NA	Upland Woodland	11670	Rocky Mountain Poor-Site Lodgepole Pine Forest	266	Lodgepole Pine-Kinnikinnick-4	Conifer	104	Tree Cover >= 40 and < 50%	7	Cascade Mountain Range	1000	North Pacific Mountain Hemlock Forest	4	Conifer	Lodgepole Pine Forest and Woodland	SAF 218: Lodgepole Pine	Tree-dominated	Closed tree canopy	100 <= CH < 250	Tr Sierra Nevada Subalpine Lodgepole Pine Forest and Woodland	Tree	Evergreen closed tree canopy	40 <= CC < 50	CRLA	Conifer
KBOLONGTKLMNCRATERLACR26_11	6153.76	180.054	4093.96	0.787464	0.78927	1472.08	27.01	7.4825	55	175	57	2	1913	0.724345		m	NE	11	11 <= CBD < 12	Succession Class D	0	No Disturbance	NA	Upland Forest	10412	North Pacific Mountain Hemlock Forest - Xeric	131	Mountain Hemlock-Huckleberry-5	Conifer	105	Tree Cover >= 50 and < 60%	7	Cascade Mountain Range	1000	North Pacific Mountain Hemlock Forest	5	Conifer	Mountain Hemlock Forest and Woodland	SAF 205: Mountain Hemlock	Tree-dominated	Closed tree canopy	100 <= CH < 250	Tr North Pacific Mountain Hemlock Forest	Tree	Evergreen closed tree canopy	50 <= CC < 60	CRLA	Conifer
KBOLONGTKLMNCRATERLACR27_08	17.482	169.942	589.375	1.63355	0.56981	1415.15	27.28	9.285	45	375	57	21	1565	0.996529		m	W	6	6 <= CBD < 7	Succession Class B	0	No Disturbance	NA	Upland Forest	10320	Mediterranean California Red Fir Forest	121	Red Fir-1	Conifer	104	Tree Cover >= 40 and < 50%	7	Cascade Mountain Range	1000	Mediterranean California Red Fir Forest	5	Conifer	Red Fir Forest and Woodland	SAF 207: Red Fir	Tree-dominated	Open tree canopy	250 <= CH < 500	Tr Mediterranean California Red Fir Forest	Tree	Evergreen open tree canopy	40 <= CC < 50	CRLA	Conifer
KBOLONGTKLMNCRATERLACR28_03	4842.7	179.505	3728.14	1.2402	0.065081	1549.79	26.62	7.18	45	175	44	1	1934	0.769308		m	NW	8	8 <= CBD < 9	Succession Class B	0	No Disturbance	NA	Upland Forest	11670	Rocky Mountain Poor-Site Lodgepole Pine Forest	266	Lodgepole Pine-Kinnikinnick-4	Conifer	104	Tree Cover >= 40 and < 50%	7	Cascade Mountain Range	1000	North Pacific Mountain Hemlock Forest	5	Conifer	Lodgepole Pine Forest and Woodland	SAF 218: Lodgepole Pine	Tree-dominated	Closed tree canopy	100 <= CH < 250	Tr Sierra Nevada Subalpine Lodgepole Pine Forest and Woodland	Tree	Evergreen closed tree canopy	40 <= CC < 50	CRLA	Conifer
KBOLONGTKLMNCRATERLACR29_06	2478.83	187.823	1787.9	1.14	1.12075	930.4	27.1	8.0725	35	175	52	1	1884	0.74398		m	Flat	6	6 <= CBD < 7	Succession Class C	0	No Disturbance	NA	Upland Woodland	11670	Rocky Mountain Poor-Site Lodgepole Pine Forest	266	Lodgepole Pine-Kinnikinnick-4	Conifer	103	Tree Cover >= 30 and < 40%	7	Cascade Mountain Range	1000	North Pacific Mountain Hemlock Forest	4	Conifer	Lodgepole Pine Forest and Woodland	SAF 218: Lodgepole Pine	Tree-dominated	Closed tree canopy	100 <= CH < 250	Tr Sierra Nevada Subalpine Lodgepole Pine Forest and Woodland	Tree	Evergreen closed tree canopy	30 <= CC < 40	CRLA	Conifer
KBOLONGTKLMNCRATERLACR30_02	3569.14	182.01	8629.86	2.36144	1.93214	1242.94	27.65	8.02	55	375	59	5	1881	0.776826		m	NW	9	9 <= CBD < 10	Succession Class B	0	No Disturbance	NA	Upland Forest	10320	Mediterranean California Red Fir Forest	121	Red Fir-1	Conifer	105	Tree Cover >= 50 and < 60%	7	Cascade Mountain Range	1000	North Pacific Mountain Hemlock Forest	5	Conifer	Red Fir Forest and Woodland	SAF 207: Red Fir	Tree-dominated	Open tree canopy	250 <= CH < 500	Tr Mediterranean California Red Fir Forest	Tree	Evergreen open tree canopy	50 <= CC < 60	CRLA	Conifer
KBOLONGTKLMNCRATERLACR30_10	3714.57	181.85	8688.82	2.1735	1.82131	1232.03	27.98	8.205	65	375	61	3	1869	0.784055		m	NW	12	12 <= CBD < 13	Succession Class E	0	No Disturbance	NA	Upland Forest	10412	North Pacific Mountain Hemlock Forest - Xeric	131	Mountain Hemlock-Huckleberry-5	Conifer	106	Tree Cover >= 60 and < 70%	7	Cascade Mountain Range	1000	North Pacific Mountain Hemlock Forest	5	Conifer	Mountain Hemlock Forest and Woodland	SAF 205: Mountain Hemlock	Tree-dominated	Closed tree canopy	250 <= CH < 500	Tr North Pacific Mountain Hemlock Forest	Tree	Evergreen closed tree canopy	60 <= CC < 70	CRLA	Conifer
KBOLONGTKLMNCRATERLACR31_10	7152.2	181.304	5568.85	0.189737	0.178517	1301.87	27.52	7.8625	0	0	0	0	1822	0.7556		d	Flat	0	Non-Forested	Barren	0	No Disturbance	NA	Undetermined	31	Barren-Rock/Sand/Clay	31	Barren-Rock/Sand/Clay	Barren-Rock/Sand/Cl*	31	Barren	7	Cascade Mountain Range	31	Barren-Rock/Sand/Clay	0	Barren	Barren	Non-vegetated	Non-vegetated	Non-vegetated	Non-Forested	Bab Barren	Barren	Non-vegetated	Non-Forested	CRLA	Conifer
KBOLONGTKLMNCRATERLACR32_03	612.015	190.086	1039.62	0.553173	0.553956	920.71	27.35	6.685	55	175	56	3	2100	0.724677		m	N	11	11 <= CBD < 12	Succession Class D	0	No Disturbance	NA	Upland Woodland	10412	North Pacific Mountain Hemlock Forest - Xeric	131	Mountain Hemlock-Huckleberry-5	Conifer	105	Tree Cover >= 50 and < 60%	7	Cascade Mountain Range	1000	North Pacific Mountain Hemlock Forest	4	Conifer	Mountain Hemlock Forest and Woodland	SAF 205: Mountain Hemlock	Tree-dominated	Closed tree canopy	100 <= CH < 250	Tr North Pacific Mountain Hemlock Forest	Tree	Evergreen closed tree canopy	50 <= CC < 60	CRLA	Conifer
KBOLONGTKLMNCRATERLACR32_12	1199.11	189.851	1196.83	0.84	0.825552	920.71	27.35	6.685	45	175	58	1	2054	0.742575		n	NE	8	8 <= CBD < 9	Succession Class B	0	No Disturbance	NA	Upland Woodland	11670	Rocky Mountain Poor-Site Lodgepole Pine Forest	266	Lodgepole Pine-Kinnikinnick-4	Conifer	104	Tree Cover >= 40 and < 50%	7	Cascade Mountain Range	1000	North Pacific Mountain Hemlock Forest	4	Conifer	Lodgepole Pine Forest and Woodland	SAF 218: Lodgepole Pine	Tree-dominated	Closed tree canopy	100 <= CH < 250	Tr Sierra Nevada Subalpine Lodgepole Pine Forest and Woodland	Tree	Evergreen closed tree canopy	40 <= CC < 50	CRLA	Conifer
KBOLONGTKLMNCRATERLACR33_08	3449.1	179.668	2372.78	0.488365	0.491307	1701.83	26.27	6.0225	0	0	6	4	2057	0.806719		m	W	0	Non-Forested	Succession Class A	0	No Disturbance	NA	Sparsely Vegetated	11780	North Pacific Hypermaritime Western Red-cedar-Western Hemlock Forest	274	Red Cedar-Western Hemlock-5	Conifer	100	Sparse Vegetation Canopy	7	Cascade Mountain Range	1000	North Pacific Mountain Hemlock Forest	1	Sparsely Vegetated	Sparse Vegetation	LF 33: Sparsely Vegetated	No Dominant Lifeform	Sparsely vegetated	Non-Forested	Sps North Pacific Sparsely Vegetated Systems	Sparse	Sparsely vegetated	Non-Forested	CRLA	Conifer
KBOLONGTKLMNCRATERLACR34_06	579.32	189.443	1792.33	0.543323	0.559933	1418.23	25.54	6.24	0	0	10	12	2268	0.682768		m	E	0	Non-Forested	Succession Class A	0	No Disturbance	NA	Sparsely Vegetated	10412	North Pacific Mountain Hemlock Forest - Xeric	131	Mountain Hemlock-Huckleberry-5	Conifer	100	Sparse Vegetation Canopy	7	Cascade Mountain Range	1000	North Pacific Mountain Hemlock Forest	1	Sparsely Vegetated	Sparse Vegetation	LF 33: Sparsely Vegetated	No Dominant Lifeform	Sparsely vegetated	Non-Forested	Sps North Pacific Sparsely Vegetated Systems	Sparse	Sparsely vegetated	Non-Forested	CRLA	Conifer
KBOLONGTKLMNCRATERLACR35_08	1394.2	178.831	2062.09	1.00578	0.998492	1775.5	25.94	5.655	25	175	0	8	2112	0.729929		m	N	4	4 <= CBD < 5	Succession Class D	0	No Disturbance	NA	Upland Woodland	10412	North Pacific Mountain Hemlock Forest - Xeric	131	Mountain Hemlock-Huckleberry-5	Conifer	102	Tree Cover >= 20 and < 30%	7	Cascade Mountain Range	1000	North Pacific Mountain Hemlock Forest	4	Conifer	Mountain Hemlock Forest and Woodland	SAF 205: Mountain Hemlock	Tree-dominated	Closed tree canopy	100 <= CH < 250	Tr North Pacific Mountain Hemlock Forest	Tree	Evergreen closed tree canopy	20 <= CC < 30	CRLA	Conifer
KBOLONGTKLMNLASSEN LV01_01	558.552	210.553	896.339	34.3871	0.93106	2586.49	25.63	9.0725	45	375	14	25	2371	1.02511		d	W	6	6 <= CBD < 7	Succession Class D	0	No Disturbance	NA	Upland Forest	10280	Mediterranean California Mesic Mixed Conifer Forest and Woodland	117	Douglas Fir-White Fir-Sugar Pine-1	Conifer	104	Tree Cover >= 40 and < 50%	6	Sierra Nevada Mountain Range	1000	Mediterranean California Mesic Mixed Conifer Forest and Woodland	5	Conifer	Red Fir Forest and Woodland	SAF 207: Red Fir	Tree-dominated	Open tree canopy	250 <= CH < 500	Tr Mediterranean California Red Fir Forest	Tree	Evergreen open tree canopy	40 <= CC < 50	LAVO	Conifer
KBOLONGTKLMNLASSEN LV01_10	118.467	210.36	1301.66	33.3579	0.177739	2329.76	25.15	9.345	45	375	27	26	2150	0.53374		i	E	6	6 <= CBD < 7	Succession Class E	0	No Disturbance	NA	Upland Woodland	10322	Mediterranean California Red Fir Forest - Southern Sierra	123	Red Fir-Western White Pine-3	Conifer	104	Tree Cover >= 40 and < 50%	6	Sierra Nevada Mountain Range	1000	Mediterranean California Red Fir Forest	4	Conifer	Red Fir Forest and Woodland	SAF 207: Red Fir	Tree-dominated	Open tree canopy	250 <= CH < 500	Tr Mediterranean California Red Fir Forest	Tree	Evergreen open tree canopy	40 <= CC < 50	LAVO	Conifer
KBOLONGTKLMNLASSEN LV02_04	208.761	217.773	480.253	40.2388	0.450193	1974.87	27.49	9.985	35	375	51	9	2072	0.715042		m	E	5	5 <= CBD < 6	Succession Class D	0	No Disturbance	NA	Upland Woodland	10321	Mediterranean California Red Fir Forest - Cascades	122	Red Fir-White Fir-1	Conifer	103	Tree Cover >= 30 and < 40%	6	Sierra Nevada Mountain Range	1000	Mediterranean California Red Fir Forest	4	Conifer	Red Fir Forest and Woodland	SAF 207: Red Fir	Tree-dominated	Open tree canopy	250 <= CH < 500	Tr Mediterranean California Red Fir Forest	Tree	Evergreen open tree canopy	30 <= CC < 40	LAVO	Conifer
KBOLONGTKLMNLASSEN LV03_09	42.442	212.948	260.601	39.1914	1.1646	2828.07	25.8	9.295	35	375	13	15	2301	0.865025		n	SE	5	5 <= CBD < 6	Succession Class D	0	No Disturbance	NA	Upland Forest	10322	Mediterranean California Red Fir Forest - Southern Sierra	123	Red Fir-Western White Pine-3	Conifer	103	Tree Cover >= 30 and < 40%	6	Sierra Nevada Mountain Range	1000	Mediterranean California Red Fir Forest	5	Conifer	Red Fir Forest and Woodland	SAF 207: Red Fir	Tree-dominated	Open tree canopy	250 <= CH < 500	Tr Mediterranean California Red Fir Forest	Tree	Evergreen open tree canopy	30 <= CC < 40	LAVO	Conifer
KBOLONGTKLMNLASSEN LV04_01	121.997	211.475	582.161	38.7909	1.50924	2934.08	25.19	8.9725	35	375	29	13	2247	0.892297		m	SW	5	5 <= CBD < 6	Succession Class D	0	No Disturbance	NA	Upland Woodland	10322	Mediterranean California Red Fir Forest - Southern Sierra	123	Red Fir-Western White Pine-3	Conifer	103	Tree Cover >= 30 and < 40%	6	Sierra Nevada Mountain Range	1000	Mediterranean California Red Fir Forest	4	Conifer	Red Fir Forest and Woodland	SAF 207: Red Fir	Tree-dominated	Open tree canopy	250 <= CH < 500	Tr Mediterranean California Red Fir Forest	Tree	Evergreen open tree canopy	30 <= CC < 40	LAVO	Conifer
KBOLONGTKLMNLASSEN LV05_02	1174.96	224.522	119.623	48.493	2.39833	1800.63	27.55	10.2475	55	375	49	10	2015	0.747871		m	SE	9	9 <= CBD < 10	Succession Class E	0	No Disturbance	NA	Upland Forest	10280	Mediterranean California Mesic Mixed Conifer Forest and Woodland	117	Douglas Fir-White Fir-Sugar Pine-1	Conifer	105	Tree Cover >= 50 and < 60%	6	Sierra Nevada Mountain Range	1000	Mediterranean California Mesic Mixed Conifer Forest and Woodland	5	Conifer	Red Fir Forest and Woodland	SAF 207: Red Fir	Tree-dominated	Open tree canopy	250 <= CH < 500	Tr Mediterranean California Red Fir Forest	Tree	Evergreen open tree canopy	50 <= CC < 60	LAVO	Conifer
KBOLONGTKLMNLASSEN LV05_07	1363.02	224.674	0	49.1293	1.92199	1801.33	27.61	10.2225	0	0	51	1	1998	0.770063		m	SW	0	Non-Forested	Succession Class C	0	No Disturbance	NA	Wetland Herb	10310	California Montane Jeffrey Pine(-Ponderosa Pine) Woodland	120	Jeffrey Pine-1	Conifer	113	Shrub Cover >= 30 and < 40%	6	Sierra Nevada Mountain Range	1000	California Montane Jeffrey Pine(-Ponderosa Pine) Woodland	9	Shrubland	Big Sagebrush Shrubland and Steppe	SRM 402: Mountain Big Sagebrush	Shrub-dominated	Herbaceous - shrub-steppe	Non-Forested	Sh Artemisia tridentata ssp. vaseyana Shrubland Alliance	Shrub	Perennial graminoid steppe	Non-Forested	LAVO	Conifer
KBOLONGTKLMNLASSEN LV06_04	429.872	209.078	676.751	35.4162	0.861471	2673.17	25.48	8.9875	0	0	5	17	2429	0.883149		m	SE	0	Non-Forested	Succession Class A	0	No Disturbance	NA	Wetland Herb	10980	California Montane Woodland and Chaparral	201	Greenleaf Manzanita-Whitethorn Ceanothus-3	Shrubland	118	Shrub Cover >= 80 and < 90%	6	Sierra Nevada Mountain Range	1000	Northern California Mesic Subalpine Woodland	9	Shrubland	Chaparral	SRM 209: Montane Shrubland	Shrub-dominated	Shrubland	Non-Forested	Sh California Montane Woodland and Chaparral	Shrub	Evergreen shrubland	Non-Forested	LAVO	Conifer
KBOLONGTKLMNLASSEN LV07_01	125.685	215.539	698.005	38.0662	1.48834	2003.17	26.76	9.7125	0	0	32	28	2092	0.691801		m	SE	0	Non-Forested	Succession Class C	0	No Disturbance	NA	Upland Shrub	10322	Mediterranean California Red Fir Forest - Southern Sierra	123	Red Fir-Western White Pine-3	Conifer	115	Shrub Cover >= 50 and < 60%	6	Sierra Nevada Mountain Range	1000	Mediterranean California Red Fir Forest	3	Shrubland	Chaparral	SRM 209: Montane Shrubland	Shrub-dominated	Shrubland	Non-Forested	Sh California Montane Woodland and Chaparral	Shrub	Evergreen shrubland	Non-Forested	LAVO	Conifer
KBOLONGTKLMNLASSEN LV09_12	112.912	208.564	852.415	35.8624	0.297875	2532.84	25.85	9.5775	0	0	6	27	2219	1.04454		s	S	0	Non-Forested	Succession Class C	0	No Disturbance	NA	Upland Shrub	10322	Mediterranean California Red Fir Forest - Southern Sierra	123	Red Fir-Western White Pine-3	Conifer	116	Shrub Cover >= 60 and < 70%	6	Sierra Nevada Mountain Range	1000	Mediterranean California Red Fir Forest	3	Shrubland	Chaparral	SRM 209: Montane Shrubland	Shrub-dominated	Shrubland	Non-Forested	Sh California Montane Woodland and Chaparral	Shrub	Evergreen shrubland	Non-Forested	LAVO	Mixed
KBOLONGTKLMNLASSEN LV11_04	293.139	215.471	184.541	40.8683	0.289299	2762.48	25.55	8.9375	35	375	20	21	2297	0.996455		m	S	5	5 <= CBD < 6	Succession Class D	0	No Disturbance	NA	Upland Woodland	10322	Mediterranean California Red Fir Forest - Southern Sierra	123	Red Fir-Western White Pine-3	Conifer	103	Tree Cover >= 30 and < 40%	6	Sierra Nevada Mountain Range	1000	Mediterranean California Red Fir Forest	4	Conifer	Red Fir Forest and Woodland	SAF 207: Red Fir	Tree-dominated	Open tree canopy	250 <= CH < 500	Tr Mediterranean California Red Fir Forest	Tree	Evergreen open tree canopy	30 <= CC < 40	LAVO	Conifer
KBOLONGTKLMNLASSEN LV12_01	82.096	215.519	386.111	42.5787	1.91241	2794.91	26.59	10.01	35	175	22	9	2125	0.633315		n	NE	6	6 <= CBD < 7	Succession Class B	0	No Disturbance	NA	Upland Woodland	10322	Mediterranean California Red Fir Forest - Southern Sierra	123	Red Fir-Western White Pine-3	Conifer	103	Tree Cover >= 30 and < 40%	6	Sierra Nevada Mountain Range	1000	Mediterranean California Red Fir Forest	4	Conifer	Red Fir Forest and Woodland	SAF 207: Red Fir	Tree-dominated	Open tree canopy	100 <= CH < 250	Tr Mediterranean California Red Fir Forest	Tree	Evergreen open tree canopy	30 <= CC < 40	LAVO	Conifer
KBOLONGTKLMNLASSEN LV13_02	107.705	229.031	0	51.8131	2.49752	1453.54	27.75	10.6575	0	0	64	1	1959	0.756697		m	NW	0	Non-Forested	Succession Class C	0	No Disturbance	NA	Wetland Herb	10310	California Montane Jeffrey Pine(-Ponderosa Pine) Woodland	120	Jeffrey Pine-1	Conifer	114	Shrub Cover >= 40 and < 50%	6	Sierra Nevada Mountain Range	1000	Mediterranean California Red Fir Forest	9	Shrubland	Chaparral	SRM 209: Montane Shrubland	Shrub-dominated	Shrubland	Non-Forested	Sh California Montane Woodland and Chaparral	Shrub	Evergreen shrubland	Non-Forested	LAVO	Conifer
KBOLONGTKLMNLASSEN LV14_05	305.64	210.649	224.937	36.344	0.068587	2838.79	24.9	8.3025	25	175	9	35	2409	0.994082		m	SW	4	4 <= CBD < 5	Succession Class C	0	No Disturbance	NA	Upland Woodland	10280	Mediterranean California Mesic Mixed Conifer Forest and Woodland	117	Douglas Fir-White Fir-Sugar Pine-1	Conifer	102	Tree Cover >= 20 and < 30%	6	Sierra Nevada Mountain Range	1000	Mediterranean California Mesic Mixed Conifer Forest and Woodland	4	Conifer	Red Fir Forest and Woodland	SAF 207: Red Fir	Tree-dominated	Open tree canopy	100 <= CH < 250	Tr Mediterranean California Red Fir Forest	Tree	Evergreen open tree canopy	20 <= CC < 30	LAVO	Conifer
KBOLONGTKLMNLASSEN LV15_07	58.852	208.118	757.308	37.4583	0.049101	2592.29	27.09	10.09	35	375	38	18	2035	0.525617		m	NE	5	5 <= CBD < 6	Succession Class D	0	No Disturbance	NA	Wetland Shrub	10321	Mediterranean California Red Fir Forest - Cascades	122	Red Fir-White Fir-1	Conifer	103	Tree Cover >= 30 and < 40%	6	Sierra Nevada Mountain Range	1000	Mediterranean California Red Fir Forest	8	Conifer	Red Fir Forest and Woodland	SAF 207: Red Fir	Tree-dominated	Open tree canopy	250 <= CH < 500	Tr Mediterranean California Red Fir Forest	Tree	Evergreen open tree canopy	30 <= CC < 40	LAVO	Conifer
KBOLONGTKLMNLASSEN LV16_09	103.948	211.719	572.059	39.8968	2.28896	2922.01	25.63	9.91	45	375	18	15	2231	0.665778		m	E	6	6 <= CBD < 7	Succession Class E	0	No Disturbance	NA	Upland Woodland	10322	Mediterranean California Red Fir Forest - Southern Sierra	123	Red Fir-Western White Pine-3	Conifer	104	Tree Cover >= 40 and < 50%	6	Sierra Nevada Mountain Range	1000	Mediterranean California Red Fir Forest	4	Conifer	Red Fir Forest and Woodland	SAF 207: Red Fir	Tree-dominated	Open tree canopy	250 <= CH < 500	Tr Mediterranean California Red Fir Forest	Tree	Evergreen open tree canopy	40 <= CC < 50	LAVO	Conifer
KBOLONGTKLMNLASSEN LV17_02	23.245	219.063	223.031	46.1269	0.481518	1649.06	28.44	11.3975	55	375	66	4	1755	0.78885		m	NW	9	9 <= CBD < 10	Succession Class E	0	No Disturbance	NA	Upland Forest	10280	Mediterranean California Mesic Mixed Conifer Forest and Woodland	117	Douglas Fir-White Fir-Sugar Pine-1	Conifer	105	Tree Cover >= 50 and < 60%	6	Sierra Nevada Mountain Range	1000	Mediterranean California Mesic Mixed Conifer Forest and Woodland	5	Conifer	Douglas-fir-Grand Fir-White Fir Forest and Woodland	SAF 211: White Fir	Tree-dominated	Closed tree canopy	250 <= CH < 500	Tr Mediterranean California Mesic Mixed Conifer Forest and Woodland	Tree	Evergreen closed tree canopy	50 <= CC < 60	LAVO	Conifer
KBOLONGTKLMNLASSEN LV17_08	244.951	218.371	109.774	45.0683	0.890546	1985.64	28.25	11.3725	65	375	64	12	1778	0.905704		l	S	12	12 <= CBD < 13	Succession Class E	0	No Disturbance	NA	Upland Forest	10280	Mediterranean California Mesic Mixed Conifer Forest and Woodland	117	Douglas Fir-White Fir-Sugar Pine-1	Conifer	106	Tree Cover >= 60 and < 70%	6	Sierra Nevada Mountain Range	1000	Mediterranean California Mesic Mixed Conifer Forest and Woodland	5	Conifer	Douglas-fir-Grand Fir-White Fir Forest and Woodland	SAF 211: White Fir	Tree-dominated	Closed tree canopy	250 <= CH < 500	Tr Mediterranean California Mesic Mixed Conifer Forest and Woodland	Tree	Evergreen closed tree canopy	60 <= CC < 70	LAVO	Conifer
KBOLONGTKLMNLASSEN LV18_04	28.232	221.092	1479.86	48.0239	0.140845	1455.51	28.46	11.3625	0	0	56	4	1647	0.812844		i	S	0	Non-Forested	Succession Class B	0	No Disturbance	NA	Wetland Shrub	11540	Inter-Mountain Basins Montane Riparian Systems	259	Black Cottonwood-Narrowleaf Willow-3	Riparian	115	Shrub Cover >= 50 and < 60%	6	Sierra Nevada Mountain Range	1200	Inter-Mountain Basins Montane Riparian Systems	8	Riparian	Western Riparian Woodland and Shrubland	SAF 235: Cottonwood-Willow	Tree-dominated	Open tree canopy	Non-Forested	Tr Inter-Mountain Basins Montane Riparian Systems	Shrub	Mixed evergreen-deciduous shrubland	Non-Forested	LAVO	Conifer
KBOLONGTKLMNLASSEN LV19_02	101.853	208.684	345.65	33.2663	2.07807	2173	25.58	8.875	55	375	31	8	2126	0.825921		i	NW	9	9 <= CBD < 10	Succession Class E	0	No Disturbance	NA	Upland Forest	10322	Mediterranean California Red Fir Forest - Southern Sierra	123	Red Fir-Western White Pine-3	Conifer	105	Tree Cover >= 50 and < 60%	6	Sierra Nevada Mountain Range	1000	Mediterranean California Red Fir Forest	5	Conifer	Red Fir Forest and Woodland	SAF 207: Red Fir	Tree-dominated	Open tree canopy	250 <= CH < 500	Tr Mediterranean California Red Fir Forest	Tree	Evergreen open tree canopy	50 <= CC < 60	LAVO	Conifer
KBOLONGTKLMNLASSEN LV20_02	14.64	210.445	264.96	32.5028	0.026236	1573.23	27.68	9.61	45	175	47	6	2035	0.7671		ac	NW	8	8 <= CBD < 9	Succession Class C	0	No Disturbance	NA	Upland Forest	11520	California Montane Riparian Systems	249	Black Cottonwood-Arroyo Willow-Madrone-3	Riparian	104	Tree Cover >= 40 and < 50%	6	Sierra Nevada Mountain Range	1200	California Montane Riparian Systems	5	Conifer	Douglas-fir-Grand Fir-White Fir Forest and Woodland	SAF 211: White Fir	Tree-dominated	Closed tree canopy	100 <= CH < 250	Tr Mediterranean California Mesic Mixed Conifer Forest and Woodland	Tree	Evergreen closed tree canopy	40 <= CC < 50	LAVO	Conifer
KBOLONGTKLMNLASSEN LV21_03	960.029	214.234	1063.28	36.6868	2.3834	2426.02	25.56	8.84	0	0	20	12	2384	0.660784		m	E	0	Non-Forested	Barren	0	No Disturbance	NA	Undetermined	31	Barren-Rock/Sand/Clay	31	Barren-Rock/Sand/Clay	Barren-Rock/Sand/Cl*	31	Barren	6	Sierra Nevada Mountain Range	31	Barren-Rock/Sand/Clay	0	Barren	Barren	Non-vegetated	Non-vegetated	Non-vegetated	Non-Forested	Bab Barren	Barren	Non-vegetated	Non-Forested	LAVO	Conifer
KBOLONGTKLMNLASSEN LV21_11	75.006	215.99	763.084	37.3808	0.741015	1822.48	27.31	9.735	35	375	39	25	2035	0.666383		h	E	5	5 <= CBD < 6	Succession Class D	0	No Disturbance	NA	Upland Woodland	10322	Mediterranean California Red Fir Forest - Southern Sierra	123	Red Fir-Western White Pine-3	Conifer	103	Tree Cover >= 30 and < 40%	6	Sierra Nevada Mountain Range	1000	Mediterranean California Mesic Mixed Conifer Forest and Woodland	4	Conifer	Red Fir Forest and Woodland	SAF 207: Red Fir	Tree-dominated	Open tree canopy	250 <= CH < 500	Tr Mediterranean California Red Fir Forest	Tree	Evergreen open tree canopy	30 <= CC < 40	LAVO	Conifer
KBOLONGTKLMNLASSEN LV22_02	5.02	216.271	1251.29	37.1331	0.266859	1648.1	27.44	10.145	35	175	52	3	1945	0.75316		g	N	6	6 <= CBD < 7	Succession Class B	0	No Disturbance	NA	Upland Woodland	11520	California Montane Riparian Systems	249	Black Cottonwood-Arroyo Willow-Madrone-3	Riparian	103	Tree Cover >= 30 and < 40%	6	Sierra Nevada Mountain Range	1200	California Montane Riparian Systems	4	Riparian	Western Riparian Woodland and Shrubland	SRM 203: Riparian Woodland	Tree-dominated	Open tree canopy	100 <= CH < 250	Tr California Montane Riparian Systems	Tree	Mixed evergreen-deciduous open tree canopy	30 <= CC < 40	LAVO	Conifer
KBOLONGTKLMNLASSEN LV22_06	65.186	215.78	2032.86	36.2174	0.103188	1568.01	27.96	10.15	55	175	52	3	1899	0.787348		i	W	11	11 <= CBD < 12	Succession Class C	0	No Disturbance	NA	Upland Forest	11520	California Montane Riparian Systems	249	Black Cottonwood-Arroyo Willow-Madrone-3	Riparian	105	Tree Cover >= 50 and < 60%	6	Sierra Nevada Mountain Range	1200	California Montane Riparian Systems	5	Riparian	Western Riparian Woodland and Shrubland	SRM 203: Riparian Woodland	Tree-dominated	Open tree canopy	100 <= CH < 250	Tr California Montane Riparian Systems	Tree	Mixed evergreen-deciduous open tree canopy	50 <= CC < 60	LAVO	Conifer
KBOLONGTKLMNLASSEN LV23_09	231.374	218.098	208.866	43.3556	1.15995	2347.37	27.74	10.225	45	375	61	10	1977	0.611311		e	NE	6	6 <= CBD < 7	Succession Class D	0	No Disturbance	NA	Upland Forest	10280	Mediterranean California Mesic Mixed Conifer Forest and Woodland	117	Douglas Fir-White Fir-Sugar Pine-1	Conifer	104	Tree Cover >= 40 and < 50%	6	Sierra Nevada Mountain Range	1000	Mediterranean California Mesic Mixed Conifer Forest and Woodland	5	Conifer	Red Fir Forest and Woodland	SAF 207: Red Fir	Tree-dominated	Open tree canopy	250 <= CH < 500	Tr Mediterranean California Red Fir Forest	Tree	Evergreen open tree canopy	40 <= CC < 50	LAVO	Mixed
KBOLONGTKLMNLASSEN LV24_07	160.616	218.568	869.625	38.3365	0.009534	1469.88	28.01	10.2525	35	375	60	5	1912	0.77219		l	SE	5	5 <= CBD < 6	Succession Class D	0	No Disturbance	NA	Upland Woodland	10310	California Montane Jeffrey Pine(-Ponderosa Pine) Woodland	120	Jeffrey Pine-1	Conifer	103	Tree Cover >= 30 and < 40%	6	Sierra Nevada Mountain Range	1000	Mediterranean California Mesic Mixed Conifer Forest and Woodland	4	Conifer	Douglas-fir-Grand Fir-White Fir Forest and Woodland	SAF 211: White Fir	Tree-dominated	Closed tree canopy	250 <= CH < 500	Tr Mediterranean California Mesic Mixed Conifer Forest and Woodland	Tree	Evergreen closed tree canopy	30 <= CC < 40	LAVO	Conifer
KBOLONGTKLMNLASSEN LV25_07	6.977	222.365	1369.65	48.1065	1.54544	1635.23	29.07	11.4075	45	175	59	9	1684	0.852607		l	SW	8	8 <= CBD < 9	Succession Class C	0	No Disturbance	NA	Upland Forest	11520	California Montane Riparian Systems	249	Black Cottonwood-Arroyo Willow-Madrone-3	Riparian	104	Tree Cover >= 40 and < 50%	6	Sierra Nevada Mountain Range	1200	California Montane Riparian Systems	5	Conifer	Douglas-fir-Grand Fir-White Fir Forest and Woodland	SAF 211: White Fir	Tree-dominated	Closed tree canopy	100 <= CH < 250	Tr Mediterranean California Mesic Mixed Conifer Forest and Woodland	Tree	Evergreen closed tree canopy	40 <= CC < 50	LAVO	Conifer
KBOLONGTKLMNLAVABEDSLB01_06	11731.1	216.924	11415.7	30.7205	29.8783	335.16	29.92	12.9175	0	0	26	1	1360	0.761274		i	SE	0	Non-Forested	Uncharacteristic Exotic Vegetation	112	Fire	Low	Upland Shrub	10170	Columbia Plateau Western Juniper Woodland and Savanna	108	Western Juniper-Low Sage-3	Conifer	125	Herb Cover >= 50 and < 60%	7	Cascade Mountain Range	1000	Columbia Plateau Western Juniper Woodland and Savanna	3	Exotic Herbaceous	Introduced Annual Grassland	LF 54: Introduced Upland Vegetation - Herbaceous	Herbaceous / Nonvascular-dominated	Herbaceous - grassland	Non-Forested	He Introduced Upland Vegetation-Annual Grassland	Herb	Annual Graminoid/Forb	Non-Forested	LABE	Conifer
KBOLONGTKLMNLAVABEDSLB02_11	8577.09	217.56	8744.78	32.2844	31.9769	313.51	30.17	12.7675	0	0	20	0	1299	0.757518		ag	SE	0	Non-Forested	Succession Class A	0	No Disturbance	NA	Sparsely Vegetated	10270	Mediterranean California Dry-Mesic Mixed Conifer Forest and Woodland	116	Ponderosa Pine-Incense Cedar-1	Conifer	100	Sparse Vegetation Canopy	7	Cascade Mountain Range	1000	Mediterranean California Dry-Mesic Mixed Conifer Forest and Woodland	1	Sparsely Vegetated	Sparse Vegetation	LF 33: Sparsely Vegetated	No Dominant Lifeform	Sparsely vegetated	Non-Forested	Sps Mediterranean California Sparsely Vegetated Systems	Sparse	Sparsely vegetated	Non-Forested	LABE	Shrubland
KBOLONGTKLMNLAVABEDSLB03_03	4035.82	215.123	4142.66	32.1414	32.1296	300.15	30.13	12.6	0	0	15	0	1256	0.7556		ag	Flat	0	Non-Forested	Uncharacteristic Exotic Vegetation	112	Fire	Low	Upland Shrub	10170	Columbia Plateau Western Juniper Woodland and Savanna	108	Western Juniper-Low Sage-3	Conifer	125	Herb Cover >= 50 and < 60%	7	Cascade Mountain Range	1000	Columbia Plateau Western Juniper Woodland and Savanna	3	Exotic Herbaceous	Introduced Annual Grassland	LF 54: Introduced Upland Vegetation - Herbaceous	Herbaceous / Nonvascular-dominated	Herbaceous - grassland	Non-Forested	He Introduced Upland Vegetation-Annual Grassland	Herb	Annual Graminoid/Forb	Non-Forested	LABE	Shrubland
KBOLONGTKLMNLAVABEDSLB03_10	3432.59	214.73	3861.26	32.1897	32.1784	299.9	30.13	12.6	0	0	23	1	1255	0.772708		ag	SW	0	Non-Forested	Uncharacteristic Exotic Vegetation	112	Fire	Low	Upland Shrub	11250	Inter-Mountain Basins Big Sagebrush Steppe	220	Wyoming Big Sage-Wheatgrass-3	Shrubland	125	Herb Cover >= 50 and < 60%	7	Cascade Mountain Range	1100	Inter-Mountain Basins Big Sagebrush Shrubland	3	Exotic Herbaceous	Introduced Annual Grassland	LF 54: Introduced Upland Vegetation - Herbaceous	Herbaceous / Nonvascular-dominated	Herbaceous - grassland	Non-Forested	He Introduced Upland Vegetation-Annual Grassland	Herb	Annual Graminoid/Forb	Non-Forested	LABE	Shrubland
KBOLONGTKLMNLAVABEDSLB04_04	10813.1	216.548	10525.7	30.4885	29.7793	333.45	29.94	12.9	0	0	23	1	1358	0.769683		ag	S	0	Non-Forested	Succession Class B	0	No Disturbance	NA	Upland Shrub	10170	Columbia Plateau Western Juniper Woodland and Savanna	108	Western Juniper-Low Sage-3	Conifer	113	Shrub Cover >= 30 and < 40%	7	Cascade Mountain Range	1000	Columbia Plateau Western Juniper Woodland and Savanna	3	Shrubland	Big Sagebrush Shrubland and Steppe	SRM 403: Wyoming Big Sagebrush	Shrub-dominated	Shrubland	Non-Forested	Sh Inter-Mountain Basins Big Sagebrush Shrubland	Shrub	Evergreen shrubland	Non-Forested	LABE	Shrubland
KBOLONGTKLMNLAVABEDSLB05_06	12057	219.195	11193.2	33.1578	32.4141	316.44	30.15	12.8575	0	0	21	1	1320	0.769308		ag	SE	0	Non-Forested	Succession Class C	0	No Disturbance	NA	Upland Shrub	11250	Inter-Mountain Basins Big Sagebrush Steppe	220	Wyoming Big Sage-Wheatgrass-3	Shrubland	112	Shrub Cover >= 20 and < 30%	7	Cascade Mountain Range	1100	Inter-Mountain Basins Big Sagebrush Shrubland	3	Shrubland	Big Sagebrush Shrubland and Steppe	SRM 403: Wyoming Big Sagebrush	Shrub-dominated	Shrubland	Non-Forested	Sh Inter-Mountain Basins Big Sagebrush Shrubland	Shrub	Evergreen shrubland	Non-Forested	LABE	Shrubland
KBOLONGTKLMNLAVABEDSLB05_11	12288	219.724	10679.3	33.6997	32.9615	314.43	30.29	12.8325	0	0	21	0	1318	0.749889		ag	E	0	Non-Forested	Succession Class D	0	No Disturbance	NA	Upland Shrub	11250	Inter-Mountain Basins Big Sagebrush Steppe	220	Wyoming Big Sage-Wheatgrass-3	Shrubland	113	Shrub Cover >= 30 and < 40%	7	Cascade Mountain Range	1100	Inter-Mountain Basins Big Sagebrush Shrubland	3	Shrubland	Big Sagebrush Shrubland and Steppe	SRM 403: Wyoming Big Sagebrush	Shrub-dominated	Shrubland	Non-Forested	Sh Inter-Mountain Basins Big Sagebrush Shrubland	Shrub	Evergreen shrubland	Non-Forested	LABE	Shrubland
KBOLONGTKLMNLAVABEDSLB06_03	8440.28	218.499	7073.27	33.6855	33.49	305.91	30.21	12.69	0	0	13	3	1279	0.778006		ag	NW	0	Non-Forested	Non-burnable Urban	0	No Disturbance	NA	Undetermined	10170	Columbia Plateau Western Juniper Woodland and Savanna	108	Western Juniper-Low Sage-3	Conifer	25	Developed-Roads	7	Cascade Mountain Range	1000	Columbia Plateau Western Juniper Woodland and Savanna	0	Developed-Roads	Developed-Roads	No Dominant Lifeform	No Dominant Lifeform	No Dominant Lifeform	Non-Forested	Bau Developed-Roads	Developed	Developed	Non-Forested	LABE	Shrubland
KBOLONGTKLMNLAVABEDSLB07_04	5578.75	217.141	2249.38	34.4183	34.4064	298.67	30.1	12.5925	0	0	17	1	1252	0.779573		ag	S	0	Non-Forested	Uncharacteristic Exotic Vegetation	112	Fire	Low	Upland Shrub	11250	Inter-Mountain Basins Big Sagebrush Steppe	220	Wyoming Big Sage-Wheatgrass-3	Shrubland	125	Herb Cover >= 50 and < 60%	7	Cascade Mountain Range	1100	Inter-Mountain Basins Big Sagebrush Shrubland	3	Exotic Herbaceous	Introduced Annual Grassland	LF 54: Introduced Upland Vegetation - Herbaceous	Herbaceous / Nonvascular-dominated	Herbaceous - grassland	Non-Forested	He Introduced Upland Vegetation-Annual Grassland	Herb	Annual Graminoid/Forb	Non-Forested	LABE	Shrubland
KBOLONGTKLMNLAVABEDSLB07_11	5275.33	216.965	1822.83	34.4787	34.4671	299.11	30.1	12.59	0	0	21	2	1250	0.744743		ag	N	0	Non-Forested	Uncharacteristic Exotic Vegetation	112	Fire	Low	Upland Shrub	11250	Inter-Mountain Basins Big Sagebrush Steppe	220	Wyoming Big Sage-Wheatgrass-3	Shrubland	125	Herb Cover >= 50 and < 60%	7	Cascade Mountain Range	1100	Inter-Mountain Basins Big Sagebrush Shrubland	3	Exotic Herbaceous	Introduced Annual Grassland	LF 54: Introduced Upland Vegetation - Herbaceous	Herbaceous / Nonvascular-dominated	Herbaceous - grassland	Non-Forested	He Introduced Upland Vegetation-Annual Grassland	Herb	Annual Graminoid/Forb	Non-Forested	LABE	Shrubland
KBOLONGTKLMNLAVABEDSLB07_12	5523.98	217.211	1757.32	34.6857	34.6741	298.67	30.1	12.5925	0	0	21	3	1246	0.736629		ag	E	0	Non-Forested	Uncharacteristic Exotic Vegetation	112	Fire	Low	Upland Shrub	11250	Inter-Mountain Basins Big Sagebrush Steppe	220	Wyoming Big Sage-Wheatgrass-3	Shrubland	125	Herb Cover >= 50 and < 60%	7	Cascade Mountain Range	1100	Inter-Mountain Basins Big Sagebrush Shrubland	3	Exotic Herbaceous	Introduced Annual Grassland	LF 54: Introduced Upland Vegetation - Herbaceous	Herbaceous / Nonvascular-dominated	Herbaceous - grassland	Non-Forested	He Introduced Upland Vegetation-Annual Grassland	Herb	Annual Graminoid/Forb	Non-Forested	LABE	Shrubland
KBOLONGTKLMNLAVABEDSLB08_01	7237.2	211.61	6472.42	26.1292	25.8457	385.16	28.86	13.02	0	0	23	1	1465	0.73742		ag	NE	0	Non-Forested	Succession Class C	0	No Disturbance	NA	Upland Shrub	11250	Inter-Mountain Basins Big Sagebrush Steppe	220	Wyoming Big Sage-Wheatgrass-3	Shrubland	112	Shrub Cover >= 20 and < 30%	7	Cascade Mountain Range	1100	Inter-Mountain Basins Big Sagebrush Shrubland	3	Shrubland	Big Sagebrush Shrubland and Steppe	SRM 403: Wyoming Big Sagebrush	Shrub-dominated	Shrubland	Non-Forested	Sh Inter-Mountain Basins Big Sagebrush Shrubland	Shrub	Evergreen shrubland	Non-Forested	LABE	Shrubland
KBOLONGTKLMNLAVABEDSLB10_10	7422.61	216.327	7654.48	31.2067	30.9766	316.33	29.94	12.79	0	0	12	3	1315	0.746547		ag	N	0	Non-Forested	Succession Class D	0	No Disturbance	NA	Upland Shrub	11250	Inter-Mountain Basins Big Sagebrush Steppe	220	Wyoming Big Sage-Wheatgrass-3	Shrubland	113	Shrub Cover >= 30 and < 40%	7	Cascade Mountain Range	1100	Inter-Mountain Basins Big Sagebrush Shrubland	3	Shrubland	Big Sagebrush Shrubland and Steppe	SRM 403: Wyoming Big Sagebrush	Shrub-dominated	Shrubland	Non-Forested	Sh Inter-Mountain Basins Big Sagebrush Shrubland	Shrub	Evergreen shrubland	Non-Forested	LABE	Shrubland
KBOLONGTKLMNLAVABEDSLB11_07	10282.8	212.115	7700.95	25.9508	25.2296	468.98	28.4	12.6975	0	0	24	1	1571	0.73742		ag	NE	0	Non-Forested	Succession Class A	112	Fire	Low	Sparsely Vegetated	10280	Mediterranean California Mesic Mixed Conifer Forest and Woodland	117	Douglas Fir-White Fir-Sugar Pine-1	Conifer	100	Sparse Vegetation Canopy	7	Cascade Mountain Range	1000	Mediterranean California Mesic Mixed Conifer Forest and Woodland	1	Sparsely Vegetated	Sparse Vegetation	LF 33: Sparsely Vegetated	No Dominant Lifeform	Sparsely vegetated	Non-Forested	Sps Inter-Mountain Basins Sparsely Vegetated Systems	Sparse	Sparsely vegetated	Non-Forested	LABE	Shrubland
KBOLONGTKLMNLAVABEDSLB12_07	8261.49	220.513	1106.6	37.8493	37.8371	296.14	30.1	12.5875	0	0	21	2	1242	0.763907		ah	SE	0	Non-Forested	Uncharacteristic Exotic Vegetation	311	Mechanical Remove	Low	Upland Shrub	10170	Columbia Plateau Western Juniper Woodland and Savanna	108	Western Juniper-Low Sage-3	Conifer	125	Herb Cover >= 50 and < 60%	7	Cascade Mountain Range	1000	Columbia Plateau Western Juniper Woodland and Savanna	3	Exotic Herbaceous	Introduced Annual Grassland	LF 54: Introduced Upland Vegetation - Herbaceous	Herbaceous / Nonvascular-dominated	Herbaceous - grassland	Non-Forested	He Introduced Upland Vegetation-Annual Grassland	Herb	Annual Graminoid/Forb	Non-Forested	LABE	Shrubland
KBOLONGTKLMNLAVABEDSLB13_02	3115.63	211.933	2757.32	28.0216	27.9949	313.08	30	12.73	0	0	18	1	1307	0.74398		ag	Flat	0	Non-Forested	Uncharacteristic Exotic Vegetation	112	Fire	Low	Upland Shrub	11250	Inter-Mountain Basins Big Sagebrush Steppe	220	Wyoming Big Sage-Wheatgrass-3	Shrubland	125	Herb Cover >= 50 and < 60%	7	Cascade Mountain Range	1100	Inter-Mountain Basins Big Sagebrush Shrubland	3	Exotic Herbaceous	Introduced Annual Grassland	LF 54: Introduced Upland Vegetation - Herbaceous	Herbaceous / Nonvascular-dominated	Herbaceous - grassland	Non-Forested	He Introduced Upland Vegetation-Annual Grassland	Herb	Annual Graminoid/Forb	Non-Forested	LABE	Shrubland
KBOLONGTKLMNLAVABEDSLB14_12	3940.37	213.849	4351.37	29.8124	29.7656	305.91	30.17	12.6925	0	0	22	1	1277	0.74398		ag	Flat	0	Non-Forested	Uncharacteristic Exotic Vegetation	112	Fire	Low	Upland Shrub	10170	Columbia Plateau Western Juniper Woodland and Savanna	108	Western Juniper-Low Sage-3	Conifer	125	Herb Cover >= 50 and < 60%	7	Cascade Mountain Range	1000	Columbia Plateau Western Juniper Woodland and Savanna	3	Exotic Herbaceous	Introduced Annual Grassland	LF 54: Introduced Upland Vegetation - Herbaceous	Herbaceous / Nonvascular-dominated	Herbaceous - grassland	Non-Forested	He Introduced Upland Vegetation-Annual Grassland	Herb	Annual Graminoid/Forb	Non-Forested	LABE	Shrubland
KBOLONGTKLMNLAVABEDSLB15_04	8605.01	219.4	5113.11	35.1569	35.0448	302.84	30.16	12.6525	0	0	17	2	1266	0.783394		ag	S	0	Non-Forested	Succession Class C	0	No Disturbance	NA	Upland Shrub	11250	Inter-Mountain Basins Big Sagebrush Steppe	220	Wyoming Big Sage-Wheatgrass-3	Shrubland	112	Shrub Cover >= 20 and < 30%	7	Cascade Mountain Range	1100	Inter-Mountain Basins Big Sagebrush Shrubland	3	Shrubland	Big Sagebrush Shrubland and Steppe	SRM 403: Wyoming Big Sagebrush	Shrub-dominated	Shrubland	Non-Forested	Sh Inter-Mountain Basins Big Sagebrush Shrubland	Shrub	Evergreen shrubland	Non-Forested	LABE	Shrubland
KBOLONGTKLMNLAVABEDSLB16_12	8753.89	220.1	3129.44	36.5785	36.5265	299.02	30.13	12.6375	0	0	20	1	1258	0.742575		ag	NE	0	Non-Forested	Succession Class C	0	No Disturbance	NA	Upland Shrub	11250	Inter-Mountain Basins Big Sagebrush Steppe	220	Wyoming Big Sage-Wheatgrass-3	Shrubland	112	Shrub Cover >= 20 and < 30%	7	Cascade Mountain Range	1100	Inter-Mountain Basins Big Sagebrush Shrubland	3	Shrubland	Big Sagebrush Shrubland and Steppe	SRM 403: Wyoming Big Sagebrush	Shrub-dominated	Shrubland	Non-Forested	Sh Inter-Mountain Basins Big Sagebrush Shrubland	Shrub	Evergreen shrubland	Non-Forested	LABE	Shrubland
KBOLONGTKLMNLAVABEDSLB17_02	10729.8	213.508	9065.44	27.3	26.5191	435.32	28.28	13.08	0	0	31	3	1512	0.789151		z	S	0	Non-Forested	Succession Class B	0	No Disturbance	NA	Upland Shrub	10170	Columbia Plateau Western Juniper Woodland and Savanna	108	Western Juniper-Low Sage-3	Conifer	112	Shrub Cover >= 20 and < 30%	7	Cascade Mountain Range	1000	Columbia Plateau Western Juniper Woodland and Savanna	3	Shrubland	Low Sagebrush Shrubland and Steppe	SRM 406: Low Sagebrush	Shrub-dominated	Herbaceous - shrub-steppe	Non-Forested	Sh Columbia Plateau Low Sagebrush Steppe	Shrub	Perennial graminoid steppe	Non-Forested	LABE	Mixed
KBOLONGTKLMNLAVABEDSLB17_10	10530.9	214.067	9695.02	27.9319	27.2001	384.31	28.72	13.07	0	0	26	2	1477	0.775388		ag	SE	0	Non-Forested	Succession Class C	0	No Disturbance	NA	Upland Shrub	11250	Inter-Mountain Basins Big Sagebrush Steppe	220	Wyoming Big Sage-Wheatgrass-3	Shrubland	112	Shrub Cover >= 20 and < 30%	7	Cascade Mountain Range	1100	Inter-Mountain Basins Big Sagebrush Shrubland	3	Shrubland	Big Sagebrush Shrubland and Steppe	SRM 403: Wyoming Big Sagebrush	Shrub-dominated	Shrubland	Non-Forested	Sh Inter-Mountain Basins Big Sagebrush Shrubland	Shrub	Evergreen shrubland	Non-Forested	LABE	Shrubland
KBOLONGTKLMNLAVABEDSLB18_07	7369.24	211.051	6599.47	25.5115	25.22	390.53	28.83	13.02	0	0	27	1	1475	0.750855		ag	N	0	Non-Forested	Barren	112	Fire	Low	Undetermined	31	Barren-Rock/Sand/Clay	31	Barren-Rock/Sand/Clay	Barren-Rock/Sand/Cl*	31	Barren	7	Cascade Mountain Range	31	Barren-Rock/Sand/Clay	0	Barren	Barren	Non-vegetated	Non-vegetated	Non-vegetated	Non-Forested	Bab Barren	Barren	Non-vegetated	Non-Forested	LABE	Shrubland
[truncated: 1,387 more rows]
